# Supplementary material for: Reassessment of Species Diversity of the Subfamily Denticollinae (Coleoptera: Elateridae) through DNA Barcoding
Source: PLoS One. 2016 Feb 5;11(2):e0148602. doi: 10.1371/journal.pone.0148602 (PMC4744053; doi:10.1371/journal.pone.0148602)
Supplement: S1 File — (FAS) [file pone.0148602.s001.fas]

>3485_Berninelsonius_hyperboreus_Russia
AACACTATACTTCATCTTCGGAGCATGATCAGGGATACTAGGAACATCTTTAAGACTATTAATCCGTGCAGAATTAGGAAACCCAGGATCACTAATTGGGAATGATCAAATTTACAACGTTATTGTTACAGCTCACGCCTTCATTATAATTTTCTTCATAGTAATGCCTATTATAATTGGAGGATTCGGAAACTGATTAGTTCCACTAATATTAGGAGCTCCTGATATAGCATTCCCTCGAATAAATAACATAAGATTCTGATTCTTACCCCCATCTCTTTCCCTTCTCCTAATAAGAAGAATTGTTGAAAATGGTGCAGGAACCGGATGAACTGTATACCCCCCTCTTTCAGCTAATATTGCACACAGAGGATCATCAGTTGATCTAGCAATTTTCAGGCTACATCTAGCCGGGATTTCTTCAATTCTAGGTGCAGTAAATTTCATTTCAACTGTTATTAACATACGCTCAACAGGAATCACATTTGATCGCATACCACTATTCGTATGAGCTGTAGCAATTACAGCCCTTCTTCTACTCTTGTCCCTACCAGTATTAGCTGGTGCAATTACTATACTACTTACAGATCGAAATTTAAATACATCATTCTTCGACCCAGCAGGGGGAGGAGACCCTATCCTATACCAACACCTATTC
>3486_Berninelsonius_hyperboreus_Russia
AACACTATACTTCATCTTCGGAGCATGATCAGGGATACTAGGAACATCTTTAAGACTATTAATCCGTGCAGAATTAGGAAACCCAGGATCACTAATTGGGAATGATCAAATTTACAACGTTATTGTTACAGCTCACGCCTTCATTATAATTTTCTTCATAGTAATGCCTATTATAATTGGAGGATTCGGAAACTGATTAGTTCCACTAATATTAGGAGCTCCTGATATAGCATTCCCTCGAATAAATAACATAAGATTCTGATTCTTACCCCCATCTCTTTCCCTTCTCCTAATAAGAAGAATTGTTGAAAATGGTGCAGGAACCGGATGAACTGTATACCCCCCTCTTTCAGCTAATATTGCACACAGAGGATCATCAGTTGATCTAGCAATTTTCAGGCTACATCTAGCCGGGATTTCTTCAATTCTAGGTGCAGTAAATTTCATTTCAACTGTTATTAACATACGCTCAACAGGAATCACATTTGATCGCATACCACTATTCGTATGAGCTGTAGCAATTACAGCCCTTCTTCTACTCCTGTCCCTACCAGTATTAGCTGGTGCAATTACTATACTACTTACAGATCGAAATTTAAATACATCATTCTTCGACCCAGCAGGGGGAGGAGACCCTATCCTATACCAACACCTATTC
>3487_Berninelsonius_hyperboreus_Russia
AACACTATACTTCATCTTCGGAGCATGATCAGGGATACTAGGAACATCTTTAAGACTATTAATCCGTGCAGAATTAGGAAACCCAGGATCACTAATTGGGAATGATCAAATTTACAATGTTATTGTTACAGCTCACGCCTTCATTATAATTTTCTTCATAGTAATGCCTATTATAATTGGAGGATTCGGAAACTGATTAGTTCCACTAATATTAGGAGCTCCTGATATAGCATTCCCTCGAATAAATAACATAAGATTCTGATTCTTACCCCCATCTCTTTCCCTTCTCCTAATAAGAAGAATTGTTGAAAATGGTGCAGGAACCGGATGAACTGTATACCCCCCTCTTTCAGCTAATATTGCACACAGAGGATCATCAGTTGATCTAGCAATTTTCAGGCTACATCTAGCCGGGATTTCTTCAATTCTAGGTGCAGTAAATTTCATTTCAACTGTTATTAACATACGCTCAACAGGAATCACATTTGATCGCATACCACTATTCGTATGAGCTGTAGCAATTACAGCCCTTCTTCTACTCTTGTCCCTACCAGTATTAGCTGGTGCAATTACTATACTACTTACAGATCGAAATTTAAATACATCATTCTTCGACCCAGCAGGGGGAGGAGACCCTATCCTATACCAACACCTATTC
>3489_Hypnoidus_narymensis_Kirgizstan
AACCCTTTACTTCCTATTTGGAGCCTGATCAGGTATACTAGGGACATCTTTAAGTCTTCTAATCCGTGCAGAACTCGGAAACCCTGGGTCTCTAATCGGAAATGATCAAATCTACAATGTAATTGTAACAGCCCATGCTTTCATTATAATTTTCTTCATAGTTATACCAATCATAATTGGAGGATTTGGAAATTGATTAGTACCTTTAATACTAGGAGCTCCTGATATAGCATTCCCCCGAATAAACAACATAAGATTCTGATTCTTGCCACCATCCTTAAGTCTACTTCTTATAAGAAGAATTGTAGAAAACGGAGCAGGAACCGGATGAACAGTGTACCCCCCTCTATCAGCCAATATTGCTCATAGAGGATCATCTGTTGATTTAGCAATTTTCAGTTTACATCTAGCTGGTATCTCATCAATTCTAGGAGCAGTAAATTTTATTTCTACCGTAATCAATATACGATCAACAGGAATCACCTTTGATCGTATACCTTTATTCGTTTGAGCTGTTGCAATTACTGCACTACTTCTGCTCCTTTCACTTCCAGTATTAGCAGGAGCAATCACTATACTACTCACAGACCGAAATTTAAACACATCCTTTTTTGATCCTGCAGGAGGAGGAGACCCAATCCTATATCAACACTTATTC
>3490_Hypnoidus_narymensis_Kirgizstan
AACCCTTTACTTCCTATTTGGAGCCTGATCAGGTATACTAGGGACATCTTTAAGTCTTCTAATCCGCGCAGAACTCGGAAACCCTGGGTCTCTAATCGGAAATGATCAAATCTACAATGTAATTGTAACAGCCCATGCTTTCATTATAATTTTCTTCATAGTTATACCAATCATAATTGGAGGATTTGGAAATTGATTAGTACCTTTAATACTAGGAGCTCCTGATATAGCATTCCCCCGAATAAACAACATAAGATTCTGATTCTTGCCACCATCTTTAAGTCTACTTCTTATAAGAAGAATTGTAGAAAACGGAGCAGGAACCGGATGAACAGTGTACCCCCCTCTATCAGCCAATATTGCTCATAGAGGATCATCTGTTGATTTAGCAATTTTCAGTTTACATCTAGCTGGTATCTCATCAATTCTAGGAGCAGTAAATTTTATTTCTACCGTAATCAATATACGATCAACAGGAATCACCTTTGATCGTATACCTTTATTCGTTTGAGCTGTTGCAATTACTGCACTACTTCTGCTCCTTTCACTTCCAGTATTAGCAGGAGCAATCACTATACTACTCACAGACCGAAATTTAAACACATCCTTTTTTGATCCTGCAGGAGGAGGAGACCCAATCCTATATCAACACTTATTC
>3202_Homotechnes_motchulskyi_Yeongwol_GW
AACCCTTTATTTTCTATTCGGGGCCTGATCAGGTATACTAGGAACATCTCTAAGATTACTAATTCGTGCAGAACTAGGAAACCCAGGATCATTAATTGGAAATGACCAAATCTATAATGTAATTGTCACAGCTCATGCATTTATTATAATTTTCTTCATAGTTATACCAATCATAATCGGGGGATTTGGAAACTGATTAGTCCCCCTTATACTAGGAGCCCCAGATATAGCTTTCCCTCGAATAAATAACATAAGATTTTGATTTTTACCCCCATCTCTTTCTCTTCTTCTGATAAGAAGAATTGTTGAAAATGGAGCAGGAACAGGATGAACTGTTTATCCCCCTCTATCAGCTAATATTGCTCATAGAGGATCCTCAGTTGATTTAGCAATTTTTAGATTACATTTAGCAGGAATTTCCTCTATTCTTGGTGCAGTAAACTTTATTTCTACCGTTATTAACATACGATCAACAGGAATTACATTTGATCGTATACCTCTATTTGTGTGAGCTGTAGCAATTACTGCTCTTCTTCTACTTTTATCACTTCCAGTTCTTGCAGGAGCAATTACAATACTTCTCACAGATCGAAATCTAAACACATCATTCTTTGACCCGGCAGGAGGAGGAGATCCAATTTTATATCAACATTTATTC
>793_Limonius_minutus_Europe
AACTTTATATTTTTTATTTGGAGCATGGGCAGGTATACTAGGCACATCTCTTAGACTTATGATTCGAGCCGAATTGGGTAATCCAGGCTCATTGATTGGCAATGACCAAATTTATAATGTTATTGTCACGGCTCATGCTTTTATTATAATTTTTTTTATAGTTATACCAATCATAATTGGAGGTTTTGGTAATTGATTAGTTCCACTAATACTAGGAGCACCTGATATAGCATTTCCTCGAATAAATAACATAAGTTTTTGGTTTCTTCCACCTTCATTATCTTTACTTTTAATAAGAAGAATTGTTGAAAATGGAGCAGGAACAGGATGAACCGTTTATCCCCCTTTATCTGCCAATATTGCTCATAGAGGATCTTCTGTAGATCTTGCAATTTTTAGTTTACATTTAGCTGGTATTTCATCAATTTTAGGAGCTGTAAATTTTATTTCAACAGTTATTAATATACGATCAGTAGGAATTACTTTTGATCGAATACCTTTATTTGTATGAGCCGTAGCTATTACTGCTTTACTACTTCTTTTATCTTTACCTGTATTAGCAGGAGCTATTACAATATTAGGTACAGACCGAAACTTAA-----------------------------------------------------------
>867_Limonius_scutellaris_Hongcheon_GW
AACTTTATATTTCTTGTTTGGAGCATGAGCAGGAATATTAGGCACATCTCTCAGACTATTAATTCGAGCCGAACTAGGAAATCCAGGCTCATTAATCGGTAACGATCAAATTTATAATGTAATTGTTACAGCACACGCTTTTATTATAATTTTCTTTATAGTTATACCAATTATAATTGGAGGATTTGGAAATTGATTAGTTCCTCTAATATTAGGAGCACCTGATATAGCATTCCCTCGTATAAATAATATAAGATTTTGATTTTTACCCCCCTCATTATCTTTATTGTTAATAAGAAGAATTGTTGAAAACGGTGCAGGTACAGGATGAACTGTTTATCCACCTTTATCAGCAAACATTGCTCATAGAGGATCTTCTGTTGATCTTGCAATTTTTAGTTTACATTTGGCAGGTATTTCTTCAATTTTAGGTGCTGTAAATTTTATTTCAACAGTTATTAATATACGATCAGTAGGAATTACTTTTGATCGTATACCTTTATTTGTCTGAGCTGTAGCTATTACAGCCTTATTGCTTTTATTATCTTTACCTGTATTAGCAGGAGCTATTACAATATTACTTACAGATCGAAATTTAAATACTTCATTTTTTGATCCTGCTGGAGGAGGAGATCCTATTTTATACCAACATCTATTT
>2362_Limonius_scutellaris_Is_Soyado_GG
AACTTTATATTTCTTGTTTGGAGCATGAGCAGGAATATTAGGCACATCTCTCAGACTATTAATTCGAGCCGAACTAGGAAATCCAGGCTCATTAATCGGTAACGATCAAATTTATAATGTGATTGTTACAGCACACGCTTTTATTATAATTTTCTTTATAGTTATACCAATTATAATTGGAGGATTTGGAAATTGATTAGTTCCTCTAATATTAGGAGCACCTGATATAGCATTCCCTCGTATAAATAATATAAGATTTTGATTTTTACCCCCCTCATTATCTTTATTGTTAATAAGAAGAATTGTTGAAAACGGTGCAGGTACAGGATGAACTGTTTATCCACCTTTATCAGCAAACATTGCTCATAGAGGATCTTCTGTTGATCTTGCAATTTTTAGTTTACATTTGGCAGGTATTTCTTCAATTTTAGGTGCTGTAAATTTTATTTCAACAGTTATTAATATACGATCAGTAGGAATTACTTTTGATCGTATACCTTTATTTGTCTGAGCTGTAGCTATTACAGCCTTATTGCTTTTATTATCTTTACCTGTATTAGCAGGAGCTATTACAATATTACTTACAGATCGAAATTTAAATACTTCATTTTTTGATCCTGCTGGAGGAGGAGATCCTATTTTATACCAACATCTATTT
>2366_Limonius_scutellaris_Is_Soyado_GG
AACTTTATATTTCTTGTTTGGAGCATGAGCAGGAATATTAGGCACATCTCTCAGACTATTAATTCGAGCCGAACTAGGAAATCCAGGCTCATTAATCGGTAACGATCAAATTTATAATGTGATTGTTACAGCACACGCTTTTATTATAATTTTCTTTATAGTTATACCAATTATAATTGGAGGATTTGGAAATTGATTAGTTCCTCTAATATTAGGAGCACCTGATATAGCATTCCCTCGTATAAATAATATAAGATTTTGATTTTTACCCCCCTCATTATCTTTATTGTTAATAAGAAGAATTGTTGAAAACGGTGCAGGTACAGGATGAACTGTTTATCCACCTTTATCAGCAAACATTGCTCATAGAGGATCTTCTGTTGATCTTGCAATTTTTAGTTTACATTTGGCAGGTATTTCTTCAATTTTAGGTGCTGTAAATTTTATTTCAACAGTTATTAATATACGATCAGTAGGAATTACTTTTGATCGTATACCTTTATTTGTCTGAGCTGTAGCTATTACAGCCTTATTGCTTTTATTATCTTTACCTGTATTAGCAGGAGCTATTACAATATTACTTACAGATCGAAATTTAAATACTTCATTTTTTGATCCTGCTGGAGGAGGAGATCCTATTTTATACCAACATCTATTT
>2617_Limonius_scutellaris_Mt_Gyeryong_Gongju_CN
AACTTTATATTTCTTGTTTGGAGCATGAGCAGGAATATTAGGCACATCTCTCAGACTATTAATTCGAGCCGAACTAGGAAATCCAGGCTCATTAATCGGTAACGATCAAATTTATAATGTAATTGTTACAGCACACGCTTTTATTATAATTTTCTTTATAGTTATACCAATTATAATTGGAGGATTTGGAAATTGATTAGTTCCTCTAATATTAGGAGCACCTGATATAGCATTCCCTCGTATAAATAATATAAGATTTTGATTTTTACCCCCCTCATTATCTTTATTGTTAATAAGAAGAATTGTTGAAAACGGTGCAGGTACAGGATGAACTGTTTATCCACCTTTATCAGCAAACATTGCTCATAGAGGATCTTCTGTTGATCTTGCAATTTTTAGTTTACATTTGGCAGGTATTTCTTCAATTTTAGGTGCTGTAAATTTTATTTCAACAGTTATTAATATACGATCAGTAGGAATTACTTTTGATCGTATACCTTTATTTGTCTGAGCTGTAGCTATTACAGCCTTATTGCTTTTATTATCTTTACCTGTATTAGCAGGAGCTATTACAATATTACTTACAGATCGAAATTTAAATACTTCATTTTTTGATCCTGCTGGAGGAGGAGATCCTATTTTATACCAACATCTATTT
>2638_Limonius_scutellaris_Bonghwa_CB
AACTTTATATTTCTTGTTTGGAGCATGAGCAGGAATATTAGGCACATCTCTCAGACTATTAATTCGAGCCGAACTAGGAAATCCAGGCTCATTAATCGGTAACGATCAAATTTATAATGTAATTGTTACAGCACACGCTTTTATTATAATTTTCTTTATAGTTATACCAATTATAATTGGAGGATTTGGAAATTGATTAGTTCCTCTAATATTAGGAGCACCTGATATAGCATTCCCTCGTATAAATAATATAAGATTTTGATTTTTACCCCCCTCATTATCTTTATTGTTAATAAGAAGAATTGTTGAAAACGGTGCAGGTACAGGATGAACTGTTTATCCACCTTTATCAGCAAACATTGCTCATAGAGGATCTTCTGTTGATCTTGCAATTTTTAGTTTACATTTGGCAGGTATTTCTTCAATTTTAGGTGCTGTAAATTTTATTTCAACAGTTATTAATATACGATCAGTAGGAATTACTTTTGATCGTATACCTTTATTTGTATGAGCTGTAGCTATTACAGCCTTATTGCTTTTATTATCTTTACCTGTATTAGCAGGAGCTATTACAATATTACTTACAGATCGAAATTTAAATACTTCATTTTTTGATCCTGCTGGAGGAGGAGATCCTATTTTATACCAACATCTATTT
>2778_Limonius_scutellaris_Jeaechon_CB
AACTTTATATTTCTTGTTTGGAGCATGAGCAGGAATATTAGGCACATCTCTCAGACTATTAATTCGAGCCGAACTAGGAAATCCAGGCTCATTAATCGGTAACGATCAAATTTATAATGTGATTGTTACAGCACACGCTTTTATTATAATTTTCTTTATAGTTATACCAATTATAATTGGAGGATTTGGAAATTGATTAGTTCCTCTAATATTAGGAGCACCTGATATAGCATTCCCTCGTATAAATAACATAAGATTTTGATTTTTACCCCCCTCATTATCTTTATTGTTAATAAGAAGAATTGTTGAAAACGGTGCAGGTACAGGATGAACTGTTTATCCACCTTTATCAGCAAACATTGCTCATAGAGGATCTTCTGTTGATCTTGCAATTTTTAGTTTACATTTGGCAGGTATTTCTTCAATTTTAGGTGCTGTAAATTTTATTTCAACAGTTATTAATATACGATCAGTAGGAATTACTTTTGATCGTATACCTTTATTTGTCTGAGCTGTAGCTATTACAGCCTTATTGCTTTTATTATCTTTACCTGTATTAGCAGGAGCTATTACAATATTACTTACAGATCGAAATTTAAATACTTCATTTTTTGATCCTGCTGGAGGAGGAGATCCTATTTTATATCAACATCTATTT
>2398_Limonius_scutellaris_Primorsky_Russia
AACTTTATATTTCTTGTTTGGAGCATGAGCAGGAATACTAGGTACATCTCTCAGACTATTAATTCGAGCCGAACTAGGAAATCCAGGCTCATTAATCGGTAACGATCAAATTTATAATGTAATTGTTACAGCACACGCTTTTATTATAATTTTCTTTATAGTTATACCAATTATAATTGGAGGATTTGGAAATTGATTAGTTCCTCTAATATTAGGAGCACCTGATATAGCATTCCCTCGTATAAATAATATAAGATTTTGATTTTTACCCCCCTCATTATCTTTATTGTTAATAAGAAGAATTGTTGAAAACGGTGCAGGTACAGGATGAACTGTTTATCCACCTTTATCAGCAAACATTGCTCATAGAGGATCTTCTGTTGATCTTGCAATTTTTAGTTTACATTTGGCAGGTATTTCTTCAATTTTAGGTGCTGTAAATTTTATTTCAACAGTTATTAATATACGATCAGTAGGAATTACTTTTGATCGTATACCTTTATTTGTCTGAGCTGTAGCTATTACAGCCTTATTGCTTTTATTATCTTTACCTGTATTAGCAGGAGCTATTACAATATTACTTACAGATCGAAATTTAAATACTTCATTTTTTGATCCTGCTGGAGGAGGAGATCCTATTTTATACCAACATCTATTT
>2564_Limonius_scutellaris_Primorsky_Russia
AACTTTATATTTCTTGTTTGGAGCATGAGCAGGAATACTAGGTACATCTCTCAGACTATTAATTCGAGCCGAACTAGGAAATCCAGGCTCATTAATCGGTAACGATCAAATTTATAATGTAATTGTTACAGCACACGCTTTTATTATAATTTTCTTTATAGTTATACCAATTATAATTGGAGGATTTGGAAATTGATTAGTTCCTCTAATATTAGGAGCACCTGATATAGCATTCCCTCGTATAAATAATATAAGATTTTGATTTTTACCCCCCTCATTATCTTTATTGTTAATAAGAAGAATTGTTGAAAACGGTGCAGGTACAGGATGAACTGTTTATCCACCTTTATCAGCAAACATTGCTCATAGAGGATCTTCTGTTGATCTTGCAATTTTTAGTTTACATTTGGCAGGTATTTCTTCAATTTTAGGTGCTGTAAATTTTATTTCAACAGTTATTAATATACGATCAGTAGGAATTACTTTTGATCGTATACCTTTATTTGTCTGAGCTGTAGCTATTACAGCCTTATTGCTTTTATTATCTTTACCTGTATTAGCAGGAGCTATTACAATATTACTTACAGATCGAAATTTAAATACTTCATTTTTTGATCCTGCTGGAGGAGGAGATCCTATTTTATACCAACATCTATT-
>2606_Cidonotus_koltzei_Sakhalin_Russia
AACTCTATATTTCCTATTCGGTGCTTGAGCCGGTATATTAGGAACATCCTTAAGACTTCTAATTCGAGCTGAACTAGGAAACCCCGGCTCTTTAATTGGAAATGATCAAATCTACAATGTAATTGTAACAGCCCATGCTTTTATCATAATTTTCTTCATAGTAATACCTATCATAATTGGTGGTTTTGGTAACTGGCTTGTCCCTCTAATATTAGGAGCTCCTGATATAGCCTTCCCACGAATAAACAACATAAGATTCTGATTTTTACCACCATCATTATCCCTCCTTCTAATAAGAAGAATTGTAGAAAATGGAGCAGGAACAGGATGAACTGTTTACCCGCCTCTTTCAGCCAACATTGCGCATAGAGGATCCTCAGTGGACCTCGCCATTTTTAGTCTGCACCTTGCTGGTATCTCATCCATTTTAGGTGCAGTAAACTTCATTTCAACAGTAATTAACATACGATCAACAGGAATCACCTTTGATCGAATGCCTCTATTCGTTTGGGCCGTAGTAATTACAGCTCTTCTTCTACTCTTATCTTTGCCTGTACTAGCAGGAGCAATTACAATACTATTAACAGATCGAAATTTAAATACCTCTTTCTTTGACCCTGCAGGAGGAGGAGACCCAATCCTATACCAACATTTATTT
>2607_Cidonotus_koltzei_Sakhalin_Russia
AACTCTATATTTCCTATTCGGTGCTTGAGCCGGAATATTAGGAACATCCTTAAGACTTCTAATTCGAGCTGAACTAGGGAACCCCGGCTCTTTAATTGGAAATGATCAAATCTACAATGTAATTGTAACAGCCCATGCTTTTATCATAATTTTCTTCATAGTAATGCCTATCATAATTGGTGGTTTTGGTAACTGGCTTGTCCCTCTAATATTGGGAGCTCCTGATATAGCCTTCCCACGAATAAATAACATAAGATTCTGATTTTTACCACCATCATTATCCCTACTTTTAATAAGAAGAATTGTAGAAAATGGAGCAGGAACGGGATGAACTGTTTACCCGCCTCTTTCAGCCAACATTGCACACAGAGGATCCTCAGTAGACCTCGCCATTTTTAGTCTGCACCTTGCTGGTATCTCATCCATTTTAGGTGCAGTAAACTTCATTTCAACAGTAATTAACATACGATCAACAGGAATTACCTTTGATCGAATACCTCTATTCGTTTGGGCCGTAGTAATTACAGCTCTTCTTCTGCTCTTATCTTTGCCTGTACTAGCAGGAGCAATTACAATACTATTAACAGATCGAAATTTAAATACCTCTTTCTTTGACCCTGCGGGGGGAGGAGACCCAATCCTATACCAACATTTATTT
>792_Pheletes_quercus_Europe
----------------------------------------GGCACATCTCTCAGACTATTAATCCGAGCAGAACTCGGAAATCCGGGGACTTTAATTGGCAATGACCAAATCTACAATGTTATTGTCACAGCCCACGCATTCATTATAATTTTCTTTATAGTTATACCCATCATAATTGGGGGATTCGGAAATTGACTTGTACCTTTAATACTAGGAGCCCCAGATATGGCATTTCCACGTATAAATAATATAAGATTCTGGTTCCTGCCCCCTTCTCTATCCCTCCTGTTAATAAGAAGTATTGTTGAAAATGGAGCAGGAACTGGTTGAACTGTTTACCCCCCACTCTCTGCCAATATTGCCCATAGAGGATCATCTGTCGATCTAGCTATTTTCAGACTACACTTAGCAGGAATTTCCTCAATTTTAGGCGCAGTAAACTTCATTTCAACAGTGATTAACATACGA---------------------------------------------------------------------------------------------------------------------------------------------------------------------------------------------
>395_Limoniscus_kraazi_Hadong_GN
AACTCTATACTTCCTATTTGGAGCATGAGCCGGTATACTAGGTACCTCCTTAAGACTACTGATCCGAACTGAATTAGGAAACCCCGGTTCCTTAATTGGAAACGACCAAATCTACAACGTAATTGTAACAGCCCATGCTTTTGTAATAATTTTTTTCATAGTAATACCAATTATAATTGGAGGATTCGGAAATTGATTAGTCCCCTTAATATTAGGAGCTCCTGATATAGCTTTCCCACGAATAAACAACATAAGATTCTGGTTCTTACCTCCTTCCCTATCCCTACTTCTAATAAGAAGAATTGTAGAGAATGGTGCAGGAACAGGCTGAACTGTTTACCCTCCCCTATCAGCCAATATTGCCCATAGAGGTTCATCTGTGGATCTTGCAATCTTCAGACTACATTTAGCTGGAATCTCGTCAATCCTAGGTGCAGTAAATTTTATCTCAACCGTAATTAACATACGATCAACAGGAATCACTTTTGATCGAATACCTCTATTTGTATGAGCAGTAGCCATCACAGCTCTACTTCTTCTCCTCTCTCTACCAGTATTAGCAGGTGCTATCACAATATTATTAACAGACCGAAATCTCAACACCTCATTCTTTGACCCAGCAGGAGGAGGTGACCCTATTTTATACCAACATCTATTT
>823_Limoniscus_kraazi_Uiwang_GG
AACTCTATACTTCCTATTTGGAGCATGAGCCGGTATACTAGGTACCTCCTTAAGACTACTGATCCGAACTGAATTAGGAAACCCCGGTTCCTTAATTGGAAACGACCAAATCTACAACGTAATTGTAACAGCCCATGCTTTTGTAATAATTTTTTTCATAGTAATACCAATTATAATTGGAGGATTCGGAAATTGGTTAGTCCCCTTAATATTAGGAGCTCCTGATATAGCTTTCCCACGAATAAACAACATAAGATTCTGGTTCTTACCTCCTTCCCTATCCCTACTCCTAATAAGAAGAATTGTAGAGAATGGTGCAGGAACAGGCTGAACTGTTTACCCTCCCCTATCAGCCAATATTGCCCATAGAGGTTCATCTGTGGATCTTGCAATCTTCAGACTACATTTAGCTGGAATCTCGTCAATCCTAGGTGCAGTAAATTTTATCTCAACCGTAATTAACATACGATCAACAGGAATCACTTTTGATCGAATACCTCTATTTGTATGAGCAGTAGCCATCACAGCTCTACTTCTTCTCCTCTCCCTACCAGTATTAGCAGGTGCTATCACAATATTATTAACAGACCGAAATCTCAACACTTCATTCTTTGATCCAGCAGGAGGAGGTGATCCTATTTTATACCAACATCTATTT
>1045_Limimoniscus_kraazi_Mt_Gyebang_GW
AACTCTATACTTCCTATTTGGAGCATGAGCCGGTATACTAGGTACCTCCTTAAGACTACTGATCCGAACTGAATTAGGAAACCCCGGTTCCTTAATTGGAAACGACCAAATCTACAACGTAATTGTAACAGCCCATGCTTTTGTAATAATTTTTTTCATAGTAATACCAATTATAATTGGAGGATTCGGAAATTGGTTAGTCCCCTTAATATTAGGAGCTCCTGATATAGCTTTCCCACGAATAAACAACATAAGATTCTGGTTCTTACCTCCTTCCCTATCCCTACTCCTAATAAGAAGAATTGTAGAGAATGGTGCAGGAACAGGCTGAACTGTTTACCCTCCCCTATCAGCCAATATTGCCCATAGAGGTTCATCTGTGGATCTTGCAATCTTCAGACTACATTTAGCTGGAATCTCGTCAATCCTAGGTGCAGTAAATTTTATCTCAACCGTAATTAACATACGATCAACAGGAATCACTTTTGATCGAATACCTCTATTTGTATGAGCAGTAGCCATCACAGCTCTACTTCTTCTCCTATCTCTACCAGTATTAGCAGGTGCTATCACAATATTATTAACAGACCGAAATCTTAACACTTCATTCTTTGATCCAGCAGGAGGAGGTGATCCTATTTTATACCAACATCTATTT
>1150_Limoniscus_kraazi_JJ
AACTCTATACTTCCTATTTGGAGCATGAGCCGGTATACTAGGTACCTCCTTAAGACTACTGATCCGAACTGAATTAGGAAACCCCGGTTCCTTAATTGGAAACGACCAAATCTACAACGTAATTGTAACAGCCCATGCTTTTGTAATAATTTTTTTCATAGTAATACCAATCATGATTGGGGGATTCGGAAATTGGTTAGTCCCCTTAATATTAGGAGCTCCTGATATAGCTTTCCCACGAATAAACAACATAAGATTCTGGTTCTTACCTCCTTCCCTATCCCTACTCCTAATAAGAAGAATTGTAGAGAATGGTGCAGGAACAGGCTGAACTGTTTACCCTCCCCTATCAGCCAATATTGCCCATAGAGGTTCATCTGTAGATCTTGCAATCTTCAGACTACATTTAGCTGGGATCTCATCAATCCTAGGTGCAGTAAATTTTATCTCAACCGTAATTAACATACGATCAACAGGAATCACTTTTGATCGAATACCTCTATTTGTATGAGCAGTCGCCATCACAGCTCTACTTCTTCTCCTCTCTCTCCCAGTATTAGCAGGTGCTATCACAATATTATTAACGGACCGAAATCTCAACACTTCATTCTTTGATCCAGCAGGAGGAGGTGACCCTATTTTATACCAACATCTATTT
>1152_Linomiscus_kraazi_Suwon_GG
AACTCTATACTTCCTATTTGGAGCATGAGCCGGTATACTAGGTACCTCCTTAAGACTACTGATCCGAACTGAATTAGGAAACCCCGGTTCCTTAATTGGAAACGACCAAATCTACAACGTAATTGTAACAGCCCATGCTTTTGTAATAATTTTTTTCATAGTAATACCAATTATAATTGGAGGATTCGGAAATTGGTTAGTCCCCTTAATATTAGGAGCTCCTGATATAGCTTTCCCACGAATAAACAACATAAGATTCTGGTTCTTACCTCCTTCCCTATCCCTACTCCTAATAAGAAGAATTGTAGAGAATGGTGCAGGAACAGGCTGAACTGTTTACCCTCCCCTATCAGCCAATATTGCCCATAGAGGTTCATCTGTGGATCTTGCAATCTTCAGACTACATTTAGCTGGAATCTCGTCAATCCTAGGTGCAGTAAATTTTATCTCAACCGTAATTAACATACGATCAACAGGAATCACTTTTGATCGAATACCTCTGTTTGTATGAGCAGTAGCCATCACAGCTCTACTTCTTCTCCTCTCTCTACCAGTATTAGCAGGTGCTATCACAATATTATTAACAGACCGAAATCTTAACACTTCATTCTTTGATCCAGCAGGAGGAGGTGACCCTATTTTATACCAACATCTATTT
>1154_Limoniscus_kraazi_Gapyeong_GG
AACTCTATACTTCCTATTTGGAGCATGAGCCGGTATACTAGGTACCTCCTTAAGACTACTGATCCGAACTGAATTAGGAAACCCCGGTTCCTTAATTGGAAACGACCAAATCTACAACGTAATTGTAACAGCCCATGCTTTTGTAATAATTTTTTTCATAGTAATACCAATTATAATTGGAGGATTCGGAAATTGGTTAGTCCCCTTAATATTAGGAGCTCCTGATATAGCTTTCCCACGAATAAACAACATAAGATTCTGGTTCTTACCTCCTTCCCTATCCCTACTCCTAATAAGAAGAATTGTAGAGAATGGTGCAGGAACAGGCTGAACTGTTTACCCTCCCCTGTCAGCCAATATTGCCCATAGAGGTTCATCTGTGGATCTTGCAATTTTCAGACTACATTTAGCTGGAATCTCGTCAATCCTAGGTGCAGTAAATTTTATCTCAACCGTAATTAACATACGATCAACAGGAATCACTTTTGATCGAATACCTCTATTTGTATGAGCAGTAGCCATCACAGCTCTACTTCTTCTCCTCTCTCTACCAGTATTAGCAGGTGCTATCACAATATTATTAACAGACCGAAATCTCAACACTTCATTCTTTGATCCAGCCGGAGGAGGTGATCCTATTTTATACCAACATCTATTT
>1155_Limoniscus_kraazi_Suwon_GG
AACTCTATACTTCCTATTTGGAGCATGAGCCGGTATACTAGGTACCTCCTTAAGACTACTGATCCGAACTGAATTAGGAAACCCCGGTTCCTTAATTGGAAACGACCAAATCTACAACGTAATTGTAACAGCCCATGCTTTTGTAATAATTTTTTTCATAGTAATACCAATTATAATTGGAGGATTCGGAAATTGGTTAGTCCCCTTAATATTAGGAGCTCCTGATATAGCTTTCCCACGAATAAACAATATAAGATTCTGGTTCTTACCTCCTTCCCTATCCCTACTCCTAATAAGAAGAATTGTAGAAAATGGTGCAGGAACAGGCTGAACTGTTTACCCTCCCCTATCAGCCAATATTGCCCATAGAGGTTCATCTGTGGATCTTGCAATCTTCAGACTACATTTAGCTGGAATCTCATCAATCCTAGGTGCAGTAAATTTTATCTCAACCGTAATTAACATACGATCAACAGGAATCACTTTTGATCGAATACCTCTGTTTGTATGAGCAGTAGCCATCACAGCTCTACTTCTTCTCCTCTCTCTACCAGTATTAGCAGGTGCTATCACAATATTATTAACAGACCGAAATCTCAACACTTCATTCTTTGATCCAGCAGGAGGAGGTGACCCTATTTTATACCAACATCTATTT
>1159_Limoniscus_kraazi_Muju_CB
AACTCTATACTTCCTATTTGGAGCATGAGCCGGTATACTAGGTACCTCCTTAAGACTACTGATCCGAACTGAATTAGGAAACCCCGGTTCCTTAATTGGAAACGACCAAATCTACAACGTAATTGTAACAGCCCATGCTTTCGTAATAATTTTTTTCATAGTAATACCAATCATAATTGGAGGATTCGGAAATTGATTAGTCCCCTTAATATTAGGAGCTCCTGATATAGCTTTCCCACGAATAAACAACATAAGATTCTGGTTCTTACCTCCTTCCCTATCCCTACTCCTAATAAGAAGAATTGTAGAGAATGGTGCAGGAACAGGCTGAACTGTTTACCCTCCCCTATCAGCCAATATTGCCCATAGAGGTTCATCTGTGGATCTTGCAATCTTCAGACTACATTTAGCTGGAATCTCGTCAATTCTAGGTGCAGTAAATTTCATCTCAACCGTAATTAACATACGATCAACAGGAATCACTTTTGATCGAATACCTCTATTTGTATGAGCAGTAGCCATCACAGCTCTACTTCTTCTCCTCTCTCTCCCAGTATTAGCAGGTGCTATCACAATATTATTAACGGACCGAAATCTTAACACTTCATTCTTTGATCCAGCAGGAGGAGGTGATCCTATTTTATACCAACATCTATTT
>1160_Limoniscus_kraazi_Muju_CB
AACTCTATACTTCCTATTTGGAGCATGAGCCGGTATACTAGGTACCTCCTTAAGACTACTGATCCGAACTGAATTAGGAAACCCCGGTTCCTTAATTGGAAACGACCAAATCTACAACGTAATTGTAACAGCCCATGCTTTTGTAATAATTTTTTTCATAGTAATACCAATTATAATTGGAGGATTCGGAAATTGGTTAGTCCCCTTAATATTAGGAGCTCCTGATATAGCTTTCCCACGAATAAACAACATAAGATTCTGGTTCTTACCTCCTTCCCTATCCCTACTCCTAATAAGAAGAATTGTAGAGAATGGTGCAGGAACAGGTTGAACTGTTTACCCTCCCCTATCAGCCAATATTGCCCATAGAGGTTCATCTGTGGATCTTGCAATCTTCAGACTACATTTAGCTGGAATCTCGTCAATCCTAGGTGCAGTAAATTTTATCTCAACCGTAATTAACATACGATCAACAGGAATCACTTTTGATCGAATACCTCTATTTGTATGAGCAGTAGCCATCACAGCTCTACTTCTTCTCCTCTCTCTACCAGTATTAGCAGGTGCTATCACAATATTATTAACAGACCGAAATCTTAACACTTCATTCTTTGATCCAGCAGGAGGAGGTGACCCTATTTTATACCAACATCTATTT
>2553_Limoniscus_kraazi_Jinju_GN
AACTCTATACTTCCTATTTGGAGCATGAGCCGGTATACTAGGTACCTCCTTAAGACTACTGATCCGAACTGAATTAGGAAACCCCGGTTCCTTAATTGGAAACGACCAAATCTACAACGTAATTGTAACAGCCCATGCTTTTGTAATAATTTTTTTCATAGTAATACCAATTATAATTGGAGGATTCGGAAATTGATTAGTCCCCTTAATATTAGGAGCTCCTGATATAGCTTTCCCACGAATAAACAACATAAGATTCTGGTTCTTACCTCCTTCCCTATCCCTACTTCTAATAAGAAGAATTGTAGAGAATGGTGCAGGAACAGGCTGAACTGTTTACCCTCCCCTATCAGCCAATATTGCCCATAGAGGTTCATCTGTGGATCTTGCAATCTTCAGTCTACATTTAGCTGGAATCTCGTCAATCCTAGGTGCAGTAAATTTTATCTCAACCGTAATTAACATACGATCAACAGGAATCACTTTTGATCGAATACCTCTATTTGTATGAGCAGTAGCCATCACAGCTCTACTTCTTCTCCTCTCTCTACCAGTATTAGCAGGTGCTATCACAATATTATTAACAGACCGAAATCTCAACACCTCATTCTTTGACCCAGCAGGAGGAGGTGACCCTATTTTATACCAACATCTATTT
>2786_Limoniscus_kraazi_Jeongsun_GW
AACTCTATACTTCCTATTTGGAGCATGAGCCGGTATACTAGGTACCTCCTTAAGACTACTGATCCGAACTGAATTAGGAAACCCCGGTTCCTTAATTGGAAACGACCAAATCTACAACGTAATTGTAACAGCCCATGCTTTTGTAATAATTTTTTTCATAGTAATACCAATTATAATTGGAGGATTCGGAAATTGGTTAGTCCCCTTAATATTAGGAGCTCCTGATATAGCTTTCCCACGAATAAACAACATAAGATTCTGGTTCTTACCTCCTTCCCTATCCCTACTCCTAATAAGAAGAATTGTAGAGAATGGTGCAGGAACAGGTTGAACTGTTTACCCTCCCCTATCAGCCAATATTGCCCATAGAGGTTCATCTGTGGATCTTGCAATCTTCAGACTACATTTAGCTGGAATCTCATCAATCCTAGGTGCAGTAAATTTTATCTCAACCGTAATTAACATACGATCAACAGGAATCACTTTTGATCGAATACCTCTATTTGTATGAGCAGTAGCCATCACAGCTCTACTTCTTCTCCTCTCTCTACCAGTATTAGCAGGTGCTATCACAATATTATTAACAGACCGAAATCTTAACACTTCATTCTTTGATCCAGCAGGAGGAGGTGATCCTATTTTATATCAACATCTATTT
>2901_Limoniscus_kraazi_Mt_Bukhan_Seoul_GG
AACTCTATACTTCCTATTTGGAGCATGAGCCGGTATACTAGGTACCTCCTTAAGACTACTGATCCGAACTGAATTAGGAAACCCCGGTTCCTTAATTGGAAACGACCAAATCTACAACGTAATTGTAACAGCCCATGCTTTTGTAATAATTTTTTTCATAGTAATACCAATTATAATTGGAGGATTCGGAAATTGGTTAGTCCCCTTAATATTAGGAGCTCCTGATATAGCTTTCCCACGAATAAACAACATAAGATTCTGGTTCTTACCTCCTTCCCTATCCCTACTCCTAATAAGAAGAATTGTAGAGAATGGTGCAGGAACAGGCTGAACTGTTTACCCTCCCCTATCAGCCAATATTGCCCATAGAGGTTCATCTGTGGATCTTGCAATCTTCAGACTACATTTAGCTGGAATCTCGTCAATCCTAGGTGCAGTAAATTTTATCTCAACCGTGATTAACATACGATCAACAGGAATCACTTTTGATCGAATACCTCTATTTGTATGAGCAGTAGCCATCACAGCTCTTCTTCTTCTCCTCTCTCTACCAGTATTAGCAGGTGCTATCACAATATTATTAACAGACCGAAATCTCAACACTTCATTCTTTGATCCAGCAGGAGGAGGTGATCCTATTTTATACCAACATCTGTTT
>2394_Limoniscus_kraazi_Primosky_Russia
AACTCTATACTTCCTATTTGGGGCATGAGCCGGTATACTAGGTACCTCCTTAAGACTACTGATCCGAACTGAATTAGGAAACCCCGGTTCCTTAATTGGAAACGACCAAATCTACAACGTAATTGTAACAGCCCATGCTTTTGTAATAATTTTTTTCATAGTAATACCAATTATAATTGGAGGATTCGGAAATTGGTTAGTCCCCTTAATATTAGGAGCTCCTGATATAGCTTTCCCACGAATAAACAACATAAGATTCTGGTTCTTACCTCCTTCCCTATCCCTACTCCTAATAAGAAGAATTGTAGAGAATGGTGCAGGAACAGGCTGAACTGTCTACCCTCCCCTATCAGCCAATATTGCCCATAGAGGTTCATCTGTGGATCTTGCAATCTTCAGACTACATTTAGCTGGAATCTCGTCAATCCTAGGTGCAGTAAATTTTATCTCAACCGTAATTAACATACGATCAACAGGAATCACTTTTGATCGAATACCTCTATTTGTATGAGCAGTAGCCATCACAGCTCTACTTCTTCTCCTCTCTCTACCAGTATTAGCAGGTGCTATCACAATATTATTAACAGACCGAAATCTCAACACTTCATTCTTTGATCCAGCAGGAGGAGGTGATCCTATTTTATACCAACATCTATTT
>3517_Athous_subfuscus_Russia
AACACTTTACTTCCTTTTTGGAGCCTGAGCTGGAATACTCGGAACTTCATTAAGACTATTGATTCGGGCCGAATTAGGAAACCCAGGTTCTCTAATTGGCAATGATCAAATCTACAATGTTATTGTCACAGCCCATGCTTTTATCATAATTTTCTTTATAGTTATACCTATCATAATTGGGGGATTCGGAAACTGACTAGTACCCCTAATACTCGGAGCTCCTGACATAGCATTTCCCCGAATAAACAACATAAGATTCTGATTCTTACCCCCGTCACTTTCCCTCTTGCTAATAAGAAGAATTGTTGAAAATGGTGCTGGTACGGGATGAACCGTTTATCCCCCCCTATCAGCTAACATTGCTCATAGAGGTTCATCTGTTGATCTAGCTATTTTTAGTCTTCACTTAGCAGGAATTTCATCAATTCTTGGAGCAGTAAATTTTATTTCTACAGTAATTAATATACGATCAACTGGAATTACCTTTGACCGAATACCCCTATTTGTATGAGCTGTGGCAATTACAGCCCTATTACTTCTACTTTCACTACCAGTCCTAGCTGGAGCTATTACAATATTATTAACAGACCGAAATCTAAATACATCCTTCTTTGACCCAGCAGGTGGGGGAGACCCCATCTTGTATCAACACTTATTC
>Athous_bicolor_Austria_HM542059
--------------------------------------------------------------------------------------------------------------------------------------------------------------------------------------------------------------------------------------------------------------------------------------------------------------------------------------------CTGTTTACCCGCCATTATCAGCCAATATTGCTCATAGAGGATCATCAGTTGATCTTGCAATCTTTAGACTACACTTAGCAGGAATCTCATCAATTCTTGGAGCAGTAAATTTTATTTCAACCGTAATTAATATACGATCAACAGGAATTACATTTGATCGATTACCATTATTTGTGTGAGCCGTAGTCATTACAGCTCTCCTCCTACTTCTTTCCCTACCAGTACTTGCAGGAGCTATCACAATATTATTAACAGATCGAAATTTAAATACATCTTTCTTTGACCCAGCAGGAGGAGGTGACCCCATCCTATACCAACACCTATTC
>Athous_haemorrhoidalis_France_GU434037
AACCCTTTACTTCCTTTTTGGAGCCTGAGCAGGAATGCTTGGAACTTCATTAAGACTACTAATCCGAGCAGAACTAGGAAACCCTGGATCTCTAATTGGAAATGATCAAATTTACAATGTTATTGTCACAGCTCATGCTTTCATTATAATTTTCTTTATAGTAATGCCTATTATAATCGGAGGATTCGGAAACTGACTAGTCCCCCTTATACTAGGAGCACCAGATATAGCCTTCCCTCGAATAAACAACATAAGATTCTGGTTCTTACCACCATCACTATCACTTCTTCTAATAAGAAGAATCGTAGAAAACGGAGCAGGAACTGGATGAACCGTCTACCCACCCTTATCAGCCAATATTGCCCATAGAGGATCATCTGTCGATCTAGCTATTTTCAGACTACATTTAGCTGGAATTTCATCAATTCTTGGAGCAGTAAACTTCATTTCAACAGTAATTAATATACGATCAACCGGAATTACATTCGACCGAATACCATTATTTGTATGAGCAGTAGTAATCACTGCACTCCTCCTACTCCTATCTCTACCCGTCCTAGCAGGTGCTATCACAATATTATTAACGGATCGAAATCTAAATACATCATTCTTCGACCCAGCAGGTGGAGGTGACCCAATCCTTTACCAACACTTATTC
>Athous_haemorrhoidalis_Poland_JF781274
-------------------------------GGAATGCTTGGAACTTCATTAAGACTACTAATCCGAGCAGAACTAGGAAACCCTGGATCTCTAATTGGAAATGATCAAATTTACAATGTTATTGTCACAGCTCATGCTTTCATTATAATTTTCTTTATAGTAATGCCTATTATAATCGGAGGATTCGGAAACTGACTAGTCCCCCTTATACTAGGAGCACCAGATATAGCCTTCCCTCGAATAAACAACATAAGATTCTGGTTCTTACCACCATCACTATCACTTCTTCTAATAAGAAGAATCGTAGAAAACGGAGCAGGAACTGGATGAACCGTCTACCCACCCTTATCAGCCAATATTGCCCATAGAGGATCATCTGTCGATCTAGCTATTTTCAGACTACATTTAGCTGGAATTTCATCAATTCTTGGAGCAGTAAACTTCATTTCAACAGTAATTAATATACGATCAACCGGAATTACATTCGACCGAATACCATTATTTGTATGAGCAGTAGTAATCACTGCACTCCTCCTACTCCTATCTCTACCCGTCCTAGCAGGTGCTATCACAATATTATTAACGGATCGAAATCTAAATACATCATTCTTCGA-------------------------------------------
>Athous_haemorrhoidalis_Poland_JF781273
-------------------------------GGAATGCTTGGAACTTCATTAAGACTACTAATCCGAGCAGAACTAGGAAACCCTGGATCTCTAATTGGAAATGATCAAATTTACAATGTTATTGTCACAGCTCATGCTTTCATTATAATTTTCTTTATAGTAATGCCTATTATAATCGGAGGATTCGGAAACTGACTAGTCCCCCTTATACTAGGAGCACCAGATATAGCCTTCCCTCGAATAAACAACATAAGATTCTGGTTCTTACCACCATCACTATCACTTCTTCTAATAAGAAGAATCGTAGAAAACGGAGCAGGAACTGGATGAACCGTCTACCCACCCTTATCAGCCAATATTGCCCATAGAGGATCATCTGTCGATCTAGCTATTTTCAGACTACATTTAGCTGGAATTTCATCAATTCTTGGAGCAGTAAACTTCATTTCAACAGTAATTAATATACGATCAACCGGAATTACATTCGACCGAATACCATTATTTGTATGAGCAGTAGTAATCACTGCACTCCTCCTACTCCTATCTCTACCTGTCCTAGCAGGTGCTATCACAATATTATTAACGGATCGAAATCTAAATACATCATTCTTCGA-------------------------------------------
>Athous_puncticollis_France_GU434041
AACACTTTACTTCCTTTTTGGAGCCTGGGCAGGAATGCTTGGAACTTCATTAAGACTATTAATCCGAGCAGAACTAGGAAACCCTGGATCCCTAATTGGAAATGATCAAATTTATAATGTTATTGTTACAGCCCATGCTTTCATTATAATCTTCTTTATAGTTATACCTATCATAATTGGTGGATTCGGAAACTGATTAGTCCCCTTAATACTAGGAGCCCCAGACATAGCATTCCCACGAATAAATAACATAAGATTCTGATTCYTACCCCCATCCCTCTCCCTYCTACTAATAAGAAGAATCGTTGAAAATGGAGCAGGAACTGGATGAACAGTCTACCCACCATTATCAGCCAACATTGCCCACAGAGGMTCATCTGTCGATCTAGCYATTTTCAGTCTACACCTAGCTGGAATCTCCTCAATTCTAGGAGCAGTAAATTTYATTTCAACAGTAATTAATATACGATCAACAGGAATCACTTTCGATCGAATACCATTATTTGTATGAGCGGTAGTAATCACYGCACTTCTTCTACTTCTATCACTTCCTGTACTAGCAGGTGCCATTACAATACTATTAACAGATCGAAACCTAAACACATCGTTCTTCGA-------------------------------------------
>Athous_puncticollis_france_GU434038
AACACTTTACTTCCTTTTTGGAGCCTGGGCAGGAATGCTTGGAACTTCATTAAGACTATTAATCCGAGCAGAACTAGGAAACCCTGGATCCCTAATTGGAAATGATCAAATTTATAATGTTATTGTTACAGCCCATGCTTTCATTATAATCTTCTTTATAGTTATACCTATCATAATTGGTGGATTCGGAAACTGATTAGTCCCCCTAATGCTAGGAGCCCCAGACATAGCATTCCCACGAATAAATAACATGAGATTCTGATTCTTACCCCCATCCCTCTCCCTTCTACTAATAAGAAGAATTGTTGAAAATGGTGCAGGAACTGGATGAACAGTCTACCCCCCATTATCAGCCAACATTGCCCAYAGAGGGTCATCTGTCGATCTAGCCATTTTCAGTCTACACCTAGCTGGAATCTCCTCAATTCTAGGAGCAGTAAATTTCATTTCAACAGTAATTAATATACGATCAACAGGAATCACTTTCGATCGAATACCATTATTTGTATGAGCAGTAGTAATCACCGCACTTCTTCTACTTCTATCACTTCCTGTACTAGCAGGTGCCATTACAATACTATTAACAGATCGAAACCTAAACACATCGTTCTTCGA-------------------------------------------
>Athous_puncticollis_France_GU434039
AACACTTTACTTCCTTTTTGGAGCCTGGGCAGGAATGCTTGGAACTTCATTAAGACTATTAATCCGAGCAGAACTAGGAAACCCTGGATCCCTAATTGGAAATGATCAAATTTATAATGTTATTGTTACAGCCCATGCTTTCATTATAATCTTCTTTATAGTTATACCCATCATAATTGGTGGATTCGGAAACTGATTAGTACCCTTAATACTAGGAGCCCCAGACATAGCATTCCCACGAATAAATAACATAAGATTCTGATTCCTACCCCCATCCCTTTCCCTCCTACTAATAAGGAGAATCGTTGAAAACGGAGCAGGAACCGGATGAACAGTCTACCCACCATTATCAGCCAACATTGCCCACAGAGGCTCATCTGTCGATCTAGCTATTTTCAGTCTACACCTAGCTGGAATCTCCTCAATTCTAGGAGCAGTAAATTTTATTTCAACAGTAATTAATATACGATCAACAGGAATCACTTTCGATCGAATACCATTATTTGTATGAGCAGTAGTAATCACTGCACTTCTTCTACTTATATCACTTCCTGTACTAGCAGGCGCCATTACAATACTATTAACAGATCGAAACCTAAACACATCGTTCTTCGA-------------------------------------------
>Athous_puncticollis_France_GU434042
-----------------------------------------GAACTTCATTAAGACTATTAATCCGAGCAGAACTAGGAAACCCTGGATCCCTAATTGGAAATGATCAAATTTATAATGTTATTGTTACAGCCCATGCTTTCATTATAATCTTCTTTATAGTTATACCCATCATAATTGGTGGATTCGGAAACTGATTAGTACCCTTAATACTAGGAGCCCCAGACATAGCATTCCCACGAATAAATAACATAAGATTCTGATTCCTACCCCCATCCCTTTCCCTCCTACTAATAAGGAGAATCGTTGAAAACGGAGCAGGAACCGGATGAACAGTCTACCCACCATTATCAGCCAACATTGCCCACAGAGGCTCATCTGTCGATCTAGCTATTTTCAGTCTACACCTAGCTGGAATCTCCTCAATTCTAGGAGCAGTAAATTTTATTTCAACAGTAATTAATATACGATCAACAGGAATCACTTTCGATCGAATACCATTATTTGTATGAGCAGTAGT-------------------------------------------------------------------------------------------------------------------------------------------
>Athous_vittatus_France_GU434040
AACACTTTATTTCCTTTTTGGAGCCTGAGCAGGAATGCTTGGAACTTCATTGAGACTATTAATCCGAGCAGAACTAGGTAACCCTGGATCTCTAATTGGAAATGATCAAATCTACAATGTCATTGTAACAGCCCACGCTTTCATTATAATTTTCTTCATAGTTATGCCTATCATAATTGGAGGATTTGGAAACTGATTAGTACCCCTTATACTAGGAGCTCCAGACATAGCATTCCCCCGAATAAACAATATAAGATTCTGATTCTTACCTCCATCTCTTTCCCTTCTACTAATAAGAAGAATTGTAGAAAATGGGGCAGGAACCGGATGAACCGTCTATCCACCTCTATCAGCCAATATTGCCCACAGAGGGTCATCCGTTGACTTAGCAATCTTCAGCCTACACCTGGCTGGAATCTCATCAATCCTTGGTGCAGTAAATTTTATCTCAACCGTAATCAATATACGATCAACCGGAATTACATTTGACCGAATACCTCTATTTGTATGGGCAGTAGTAATCACCGCACTACTACTTCTTCTATCATTACCTGTACTAGCAGGAGCAATTACAATACTACTAACAGACCGAAACCTAAATACATCATTCTT----------------------------------------------
>Athous_vittatus_France_GU434036
AACACTTTATTTCCTTTTTGGAGCCTGAGCAGGAATGCTTGGAACTTCATTGAGACTATTAATCCGAGCAGAACTAGGTAACCCTGGATCTCTAATTGGAAATGATCAAATCTACAATGTCATTGTAACAGCCCACGCTTTCATTATAATTTTCTTCATAGTTATGCCTATCATAATTGGAGGATTTGGAAACTGATTAGTACCCCTTATACTAGGAGCTCCAGACATAGCATTCCCCCGAATAAAYAATATAAGATTCTGATTCTTACCTCCATCTCTTTCCCTTCTACTAATAAGAAGAATTGTAGAAAATGGGGCAGGAACCGGATGAACCGTCTATCCACCTCTATCAGCCAATATTGCCCACAGAGGGTCATCCGTTGACTTAGCAATCTTCAGCCTACACCTGGCTGGAATCTCATCAATCCTTGGTGCAGTAAATTTTATCTCAACCGTAATCAATATACGATCAACCGGAATTACATTTGACCGAATACCTCTATTTGTATGGGCAGTAGTAATCACCGCACTACTACTTCTTCTATCATTACCTGTACTAGCAGGAGCAATTACAATACTACTAACAGACCGAAACCTAAATACATCATTCTT----------------------------------------------
>Athous_vittatus_France_GU434043
--------------------------------------------CTTCATTGAGACTATTAATCCGAGCAGAACTAGGTAACCCTGGATCTCTAATTGGAAATGATCAAATCTACAATGTCATTGTAACAGCCCACGCTTTCATTATAATTTTCTTCATAGTTATGCCTATCATAATTGGAGGATTTGGAAACTGATTAGTACCCCTTATACTAGGAGCTCCAGACATAGCATTCCCCCGAATAAACAATATAAGATTCTGATTCTTACCTCCATCTCTTTCCCTTCTACTAATAAGAAGAATTGTAGAAAATGGGGCAGGAACCGGATGAACCGTCTATCCACCTCTATCAGCCAATATTGCCCACAGAGGGTCATCCGTTGACTTAGCAATCTTCAGCCTACACCTGGCTGGAATCTCATCAATCCTTGGTGCAGTAAATTTTATCTCAACCGTAATCAATATACGATCAACCGGAATTACATTTGACCGAATACCTCTATTTGTATGGGCAGTAGTAATCACCGCACTACTACTTCTTCTATCATTACCTGTACTAGCAGGAGCAATTACAATACTACTAACAGACCGAAACCTAAATACATCATTCTT----------------------------------------------
>Athous_vittatus_Poland_JF781275
-------------------------------GGAATGCTTGGAACTTCACTAAGACTATTAATCCGAGCAGAACTAGGAAACCCTGGATCTTTAATTGGAAACGACCAAATTTATAACGTTATCGTCACAGCTCATGCTTTCATTATAATTTTCTTCATGGTTATACCTATTATAATTGGTGGATTCGGAAACTGATTAATCCCACTCATACTAGGAGCACCAGACATAGCATTCCCACGAATAAACAACATAAGATTCTGATTTCTACCTCCATCACTCTCCCTCCTTCTAATAAGAAGAATTGTTGAAAACGGAGCAGGAACTGGTTGAACAGTATACCCGCCTCTATCAGCTAACATTGCCCACAGAGGATCATCTGTTGACCTGGCCATTTTCAGACTACACCTGGCCGGAATCTCCTCAATTCTAGGAGCAGTAAATTTTATTTCAACAGTAATTAATATACGATCAACAGGAATCACATTTGATCGAATACCCCTATTCGTATGAGCCGTAGTAATTACTGCACTTCTACTTCTTCTATCACTACCTGTCCTAGCAGGAGCTATTACAATGTTATTAACAGATCGAAATCTAAATACATCATTCTTCGA-------------------------------------------
>229_Hemicrepidius_coreanus_JJ
AACACTTTACTTTTTATTTGGAGCCTGATCAGGAATATTAGGTACTTCACTTAGACTTCTAATCCGTGCAGAACTTGGAAACCCCGGCTCACTAATTGGGAAtGACCAAATTTATAATGTTATTGTTACAGCTCATGCCTTTATCATAATTTTCTTTATAGTAATACCAATTATAATTGGAGGATTCGGTAACTGATTAGTCCCCTTAATACTAGGAGCCCCTGATATAGCCTTCCCTCGAATAAACAATATAAGATTCTGGTTTCTCCCTCCCTCTTTATCACTTTTACTAATAAGAAGAATTGTAGAAAATGGGGCAGGAACAGGCTGAACAGTTTACCCTCCTCTTTCGGCTAATATTGCTCATAGAGGATCCTCTGTAGACCTAGCAATTTTCAGTTTACACCTAGCCGGGATCTCCTCAATTCTAGGCGCAGTAAATTTTATTTCCACAGTAATTAATATACGATCAACCGGAATCACATTTGACCGAATACCTTTATTTGTATGAGCGGTAGCCATCACAGCTCTTTTACTTCTACTGTCCCTCCCTGTTCTTGCAGGAGCCATCACTATACTTCTAACTGACCGAAATCTAAATACCTCTTTCTTTGACCCAGCAGGTGGTGGAGACCCAATTCTTTACCAACACTTATTC
>230_Hemicrepidius_coreanus_JJ
AACACTTTACTTTTTATTTGGAGCCTGATCAGGAATATTAGGTACTTCACTTAGACTTCTAATCCGTGCAGAACTTGGAAACCCCGGCTCACTAATTGGGAATGACCAAATTTATAATGTTATTGTTACAGCTCATGCCTTTATCATAATTTTCTTTATAGTAATACCAATTATAATTGGAGGATTCGGTAACTGATTAGTCCCCTTAATACTAGGAGCCCCTGATATAGCCTTCCCTCGAATAAACAATATAAGATTCTGGTTTCTCCCTCCCTCTTTATCACTTTTACTAATAAGAAGAATTGTAGAAAATGGGGCAGGAACAGGCTGAACAGTTTACCCTCCTCTTTCGGCTAATATTGCTCATAGAGGATCCTCTGTAGACCTAGCAATTTTCAGTTTACACCTAGCCGGGATCTCCTCAATTCTAGGTGCAGTAAATTTTATTTCCACAGTAATTAATATACGATCAACCGGAATCACATTTGACCGAATACCTTTATTTGTATGAGCGGTAGCCATCACAGCTCTTTTACTTCTACTGTCCCTCCCTGTTCTTGCAGGAGCCATCACTATACTTCTAACTGACCGAAATCTAAATACCTCTTTCTTTGACCCAGCAGGTGGTGGAGACCCAATTCTTTACCAACACTTATTC
>231_Hemicrepidius_coreanus_JJ
AACACTTTACTTTTTATTTGGAGCCTGATCAGGAATATTAGGTACTTCACTTAGACTTCTAATCCGTGCAGAACTTGGAAACCCCGGCTCACTAATTGGGAATGACCAAATTTATAATGTTATTGTTACAGCTCATGCCTTTATCATAATTTTCTTTATAGTAATACCAATTATAATTGGAGGATTCGGTAACTGATTAGTCCCCTTAATACTAGGAGCCCCTGATATAGCCTTCCCTCGAATAAACAATATAAGATTCTGGTTTCTCCCTCCCTCTTTATCACTTTTACTAATAAGAAGAATTGTAGAAAATGGGGCAGGAACAGGCTGAACAGTTTACCCTCCTCTTTCGGCTAATATTGCTCATAGAGGATCCTCTGTAGACCTAGCAATTTTCAGTTTACACCTAGCCGGGATCTCCTCAATTCTAGGCGCAGTAAATTTTATTTCCACAGTAATTAATATACGATCGACCGGAATCACATTTGACCGAATACCTTTATTTGTATGAGCGGTAGCCATCACAGCTCTTTTACTTCTACTGTCCCTCCCTGTTCTTGCAGGAGCCATCACTATACTTCTAACTGACCGAAATCTAAATACCTCTTTCTTTGACCCAGCAGGTGGTGGAGACCCAATTCTTTACCAACACTTATTC
>232_Hemicrepidius_coreanus_JJ
AACACTTTACTTTTTATTTGGAGCCTGATCAGGAATATTAGGTACTTCACTTAGACTTCTAATCCGTGCAGAACTTGGAAACCCCGGCTCACTAATTGGGAATGACCAAATTTATAATGTTATTGTTACAGCTCAtGCCTTTATCATAATTTTCTTTATAGTAATACCAATTATAATTGGAGGATTCGGTAACTGATTAGTCCCCTTAATACTAGGAGCCCCTGATATAGCCTTCCCTCGAATAAACAATATAAGATTCTGGTTTCTCCCTCCCTCTTTATCACTTTTACTAATAAGAAGAATTGTAGAAAATGGGGCAGGAACAGGCTGAACAGTTTACCCTCCTCTTTCGGCTAATATTGCTCATAGAGGATCCTCTGTAGACCTAGCAATTTTCAGTTTACACCTAGCCGGGATCTCCTCAATTCTAGGTGCAGTAAATTTTATTTCCACAGTAATTAATATACGATCAACCGGAATCACATTTGACCGAATACCTTTATTTGTATGAGCGGTAGCCATCACAGCTCTTTTACTTCTACTGTCCCTCCCTGTTCTTGCAGGAGCCATCACTATACTTCTAACTGACCGAAATCTAAATACCTCTTTCTTTGACCCAGCAGGTGGTGGAGACCCAATTCTTTACCAACACTTATTC
>233_Hemicrepidius_coreanus_JJ
AACACTTTACTTTTTATTTGGAGCCTGATCAGGAATATTAGGTACTTCACTTAGACTTCTAATCCGTGCAGAACTTGGAAACCCCGGCTCACTAATTGGGAATGACCAAATTTATAATGTTATTGTTACAGCTCATGCCTTTATCATAATTTTCTTTATAGTAATACCAATTATAATTGGAGGATTCGGTAACTGATTAGTCCCCTTAATACTAGGAGCCCCTGATATAGCCTTCCCTCGAATAAACAATATAAGATTCTGGTTTCTCCCTCCCTCTTTATCACTTTTACTAATAAGAAGAATTGTAGAAAATGGGGCAGGAACAGGCTGAACAGTTTACCCTCCTCTTTCGGCTAATATTGCTCATAGAGGATCCTCTGTAGACCTAGCAATTTTCAGTTTACACCTAGCCGGGATCTCCTCAATTCTAGGCGCAGTAAATTTTATTTCCACAGTAATTAATATACGATCGACCGGAATCACATTTGACCGAATACCTTTATTTGTATGAGCGGTAGCCATCACAGCTCTTTTACTTCTACTGTCCCTCCCTGTTCTTGCAGGAGCCATCACTATACTTCTAACTGACCGAAATCTAAATACCTCTTTCTTTGACCCAGCAGGTGGTGGAGACCCAATTCTTTACCAACACTTATTC
>235_Hemicrepidius_coreanus_JJ
AACACTTTACTTTTTATTTGGAGCCTGATCAGGAATATTAGGTACTTCACTTAGACTTCTAATCCGTGCAGAACTTGGAAACCCCGGCTCACTAATTGGGAATGACCAAATTTATAATGTTATTGTTACAGCTCATGCCTTTATCATAATTTTCTTTATAGTAATACCAATTATAATTGGAGGATTCGGTAACTGATTAGTCCCCTTAATACTAGGAGCCCCTGATATAGCCTTCCCTCGAATAAACAATATAAGATTCTGGTTTCTCCCTCCCTCTTTATCACTTTTACTAATAAGAAGAATTGTAGAAAATGGGGCAGGAACAGGCTGAACAGTTTACCCTCCTCTTTCGGCTAATATTGCTCATAGAGGATCCTCTGTAGACCTAGCAATTTTCAGTTTACACCTAGCCGGGATCTCCTCAATTCTAGGTGCAGTAAATTTTATTTCCACAGTAATTAATATACGATCAACCGGAATCACATTTGACCGAATACCTTTATTTGTATGAGCGGTAGCCATCACAGCTCTTTTACTTCTACTGTCCCTCCCTGTTCTTGCAGGAGCCATCACTATACTTCTAACTGACCGAAATCTAAATACCTCTTTCTTTGACCCAGCAGGTGGTGGAGACCCAATTCTTTACCAACACTTATTC
>236_Hemicrepidius_coreanus_JJ
AACACTTTACTTTTTATTTGGAGCCTGATCAGGAATATTAGGTACTTCACTTAGACTTCTAATCCGTGCAGAACTTGGAAACCCCGGCTCACTAATTGGGAATGACCAAATTTATAATGTTATTGTTACAGCTCATGCCTTTATCATAATTTTCTTTATAGTAATACCAATTATAATTGGAGGATTCGGTAACTGATTAGTCCCCTTAATACTAGGAGCCCCTGATATAGCCTTCCCTCGAATAAACAATATAAGATTCTGGTTTCTCCCTCCCTCTTTATCACTTTTACTAATAAGAAGAATTGTAGAAAATGGGGCAGGAACAGGCTGAACAGTTTACCCTCCTCTTTCGGCTAATATTGCTCATAGAGGATCCTCTGTAGACCTAGCAATTTTCAGTTTACACCTAGCCGGGATCTCCTCAATTCTAGGCGCAGTAAATTTTATTTCCACAGTAATTAATATACGATCAACCGGAATCACATTTGACCGAATACCTTTATTTGTATGAGCGGTAGCCATCACAGCTCTTTTACTTCTACTGTCCCTCCCTGTTCTTGCAGGAGCCATCACTATACTTCTAACTGACCGAAATCTAAATACCTCTTTCTTTGACCCAGCAGGTGGTGGAGACCCAATTCTTTACCAACACTTATTC
>238_Hemicrepidius_coreanus_JJ
AACACTTTACTTTTTATTTGGAGCCTGATCAGGAATATTAGGTACTTCACTTAGACTTCTAATCCGTGCAGAACTTGGAAACCCCGGCTCACTAATTGGGAATGACCAAATTTATAATGTTATTGTTACAGCTCAtGCCTTTATCATAATTTTCTTTATAGTAATACCAATTATAATTGGAGGATTCGGTAACTGATTAGTCCCCTTAATACTAGGAGCCCCTGATATAGCCTTCCCTCGAATAAACAATATAAGATTCTGGTTTCTCCCTCCCTCTTTATCACTTTTACTAATAAGAAGAATTGTAGAAAATGGAGCAGGAACAGGCTGAACAGTTTACCCTCCTCTTTCGGCTAATATTGCTCATAGAGGATCCTCTGTAGACCTAGCAATTTTCAGTTTACACCTAGCCGGGATCTCCTCAATTCTAGGCGCAGTAAATTTTATTTCCACAGTAATTAATATACGATCAACCGGAATCACATTTGACCGAATACCTTTATTTGTGTGAGCGGTAGCCATCACAGCTCTTTTACTTCTACTGTCCCTCCCTGTTCTTGCAGGAGCCATCACTATACTTCTAACTGACCGAAATCTAAATACCTCTTTCTTTGACCCAGCAGGTGGTGGAGACCCAATTCTTTACCAACACTTATTC
>240_Hemicrepidius_coreanus_JJ
AACACTTTACTTTTTATTTGGAGCCTGATCAGGAATATTAGGTACTTCACTTAGACTTCTAATCCGTGCAGAACTTGGAAACCCCGGCTCACTAATTGGGAACGACCAAATTTATAATGTTATTGTTACAGCTCATGCCTTTATCATAATTTTCTTTATAGTAATACCAATTATAATTGGAGGATTCGGTAACTGATTAGTCCCCTTAATACTAGGAGCCCCTGATATAGCCTTCCCTCGAATAAACAATATAAGATTCTGGTTTCTCCCTCCCTCTTTATCACTTTTACTAATAAGAAGAATTGTAGAAAATGGGGCAGGAACAGGCTGAACAGTTTACCCTCCTCTTTCGGCTAATATTGCTCATAGAGGATCCTCTGTAGACCTAGCAATTTTCAGTTTACACCTAGCCGGGATCTCCTCAATTCTAGGCGCAGTAAATTTTATTTCCACAGTAATTAATATACGATCAACCGGAATCACATTTGACCGAATACCTTTATTTGTATGAGCGGTAGCCATCACAGCTCTTTTACTTCTACTGTCCCTCCCTGTTCTTGCAGGAGCCATCACTATACTTCTAACTGACCGAAATCTAAATACCTCTTTCTTTGACCCAGCAGGTGGTGGAGACCCAATTCTTTACCAACACTTATTC
>244_Hemicrepidius_coreanus_JJ
AACACTTTACTTTTTATTTGGAGCCTGATCAGGAATATTAGGTACTTCACTTAGACTTCTAATCCGTGCAGAACTTGGAAACCCCGGCTCACTAATTGGGAATGACCAAATTTATAATGTTATTGTTACAGCTCATGCCTTTATCATAATTTTCTTTATAGTAATACCAATTATAATTGGGGGATTCGGTAACTGATTAGTCCCCTTAATACTAGGAGCCCCTGATATAGCCTTCCCTCGAATAAACAATATAAGATTCTGGTTTCTCCCTCCCTCTTTATCACTTTTACTAATAAGAAGAATTGTAGAAAATGGGGCAGGAACAGGCTGAACAGTTTACCCTCCTCTTTCGGCTAATATTGCTCATAGAGGATCCTCTGTAGACCTAGCAATTTTCAGTTTACACCTAGCCGGGATCTCCTCAATTCTAGGCGCAGTAAATTTTATTTCCACAGTAATTAATATACGATCAACCGGAATCACATTTGATCGAATACCTTTATTTGTATGAGCGGTAGCCATCACAGCTCTTTTACTTCTACTGTCCCTCCCTGTTCTTGCAGGAGCCATCACTATACTTTTAACTGACCGAAATCTAAATACCTCTTTCTTTGACCCAGCAGGTGGTGGAGACCCAATTCTTTACCAACACTTATTC
>246_Hemicrepidius_coreanus_JJ
AACACTTTACTTTTTATTTGGAGCCTGATCAGGAATATTAGGTACTTCACTTAGACTTCTAATCCGTGCAGAACTTGGAAACCCCGGCTCACTAATTGGGAATGACCAAATTTATAATGTTATTGTTACAGCTCATGCCTTTATCATAATTTTCTTTATAGTAATACCAATTATAATTGGAGGATTCGGTAACTGATTAGTCCCCTTAATACTAGGAGCCCCTGATATAGCCTTCCCTCGAATAAACAATATAAGATTCTGGTTTCTCCCTCCCTCTTTATCACTTTTACTAATAAGAAGAATTGTAGAAAATGGGGCAGGAACAGGCTGAACAGTTTACCCTCCTCTTTCGGCTAATATTGCTCATAGAGGATCCTCTGTAGACCTAGCAATTTTCAGTTTACACCTAGCCGGGATCTCCTCAATTCTAGGCGCAGTAAATTTTATTTCCACAGTAATTAATATACGATCAACCGGAATCACATTTGACCGAATACCTTTATTTGTATGAGCGGTAGCCATCACAGCTCTTTTACTTCTACTGTCCCTCCCTGTTCTTGCAGGAGCCATCACTATACTTCTAACTGACCGAAATCTAAATACCTCTTTCTTTGACCCAGCAGGTGGTGGAGACCCAATTCTTTACCAACACTTATTC
>248_Hemicrepidius_coreanus_JJ
AACACTTTACTTTTTATTTGGAGCCTGATCAGGAATATTAGGTACTTCACTTAGACTTCTAATCCGTGCAGAACTTGGAAACCCCGGCTCACTAATTGGGAATGACCAAATTTATAATGTTATTGTTACAGCTCATGCCTTTATCATAATTTTCTTTATAGTAATACCAATTATAATTGGAGGATTCGGTAACTGATTAGTCCCCTTAATACTAGGAGCCCCTGATATAGCCTTCCCTCGAATAAACAATATAAGATTCTGGTTTCTCCCTCCCTCTTTATCACTTTTACTAATAAGAAGAATTGTAGAAAATGGGGCAGGAACAGGCTGAACAGTTTACCCTCCTCTTTCGGCTAATATTGCTCATAGAGGATCCTCTGTAGACCTAGCAATTTTCAGTTTACACCTAGCCGGGATCTCCTCAATTCTAGGCGCAGTAAATTTTATTTCCACAGTAATTAATATACGATCAACCGGAATCACATTTGACCGAATACCTTTATTTGTATGAGCGGTAGCCATCACAGCTCTTTTACTTCTACTGTCCCTCCCTGTTCTTGCAGGAGCCATCACTATACTTCTAACTGACCGAAATCTAAATACCTCTTTCTTTGACCCAGCAGGTGGTGGAGACCCAATTCTTTACCAACACTTATTC
>1046_Hemicrepidius_coreanus_Seoguipo_JJ
AACACTTTACTTTTTATTTGGAGCCTGATCAGGAaTATTAGGTACTTCACTTAGACTTCTAATCCGTGCAGAACTTGGAAACCCCGGCTCACTAATTGGGAATGACCAAATTTATAATGTTATTGTTACAGCTCATGCCTTTATCATAATTTTCTTTATAGTAATACCAATTATAATTGGAGGATTCGGTAACTGATTAGTCCCCTTAATACTAGGAGCCCCTGATATAGCCTTCCCTCGAATAAACAATATAAGATTCTGGTTTCTCCCTCCCTCTTTATCACTTTTACTAATAAGAAGAATTGTAGAAAATGGAGCAGGAACAGGCTGAACAGTTTACCCTCCTCTTTCGGCTAATATTGCTCATAGAGGATCCTCTGTAGACCTAGCAATTTTCAGTTTACACCTAGCCGGGATCTCCTCAATTCTAGGCGCAGTAAATTTTATTTCCACAGTAATTAATATACGATCAACCGGAATCACATTTGACCGAATACCTTTATTTGTATGAGCGGTAGCCATCACAGCTCTTTTACTTCTACTGTCCCTCCCTGTTCTTGCAGGAGCCATCACTATACTTCTAACTGACCGAAATCTAAATACCTCTTTCTTTGACCCAGCGGGTGGTGGAGACCCAATTCTTTACCAACACTTATTC
>1047_Hemicrepidius_coreanus_seoguipo_JJ
AACACTTTACTTTTTATTTGGAGCCTGATCAGGAATATTAGGTACTTCACTTAGACTTCTAATCCGTGCAGAACTTGGAAACCCCGGCTCACTAATTGGGAATGACCAAATTTATAATGTTATTGTTACAGCTCATGCCTTTATCATAATTTTCTTTATAGTAATACCAATTATAATTGGAGGATTCGGTAACTGATTAGTCCCCTTAATACTAGGAGCCCCTGATATAGCCTTCCCTCGAATAAACAATATAAGATTCTGGTTTCTCCCTCCCTCTTTATCACTTTTACTAATAAGAAGAATTGTAGAAAATGGGGCAGGAACAGGCTGAACAGTTTACCCTCCTCTTTCGGCTAATATTGCTCATAGAGGATCCTCTGTAGACCTAGCAATTTTCAGTTTACACCTAGCCGGGATCTCCTCAATTCTAGGCGCAGTAAATTTTATTTCCACAGTAATTAATATACGATCAACCGGAATCACATTTGACCGAATACCTTTATTTGTATGAGCGGTAGCCATCACAGCTCTTTTACTTCTACTGTCCCTCCCTGTTCTTGCAGGAGCCATCACTATACTTCTAACTGACCGAAATCTAAATACCTCTTTCTTTGACCCAGCAGGTGGTGGAGACCCAATTCTTTACCAACACTTATTC
>1048_Hemicrepidius_coreanus_Seogipo_JJ
AACACTTTACTTTTTATTTGGAGCCTGATCAGGAATATTAGGTACTTCACTTAGACTTCTAATCCGTGCAGAACTTGGAAACCCCGGCTCACTAATTGGGAATGACCAAATTTATAATGTTATTGTTACAGCTCATGCCTTTATCATAATTTTCTTTATAGTAATACCAATTATAATTGGGGGATTCGGTAACTGATTAGTCCCCTTAATACTAGGAGCCCCTGATATAGCCTTCCCTCGAATAAACAATATAAGATTCTGGTTTCTCCCTCCCTCTTTATCACTTTTACTAATAAGAAGAATTGTAGAAAATGGGGCAGGAACAGGCTGAACAGTTTACCCTCCTCTTTCGGCTAATATTGCTCATAGAGGATCCTCTGTAGACCTAGCAATTTTCAGTTTACACCTAGCCGGGATCTCCTCAATTCTAGGCGCAGTAAATTTTATTTCCACAGTAATTAATATACGATCAACCGGAATCACATTTGACCGAATACCTTTATTTGTATGAGCGGTAGCCATCACAGCTCTTTTACTTCTACTGTCCCTCCCTGTTCTTGCAGGAGCCATCACTATACTTCTAACTGACCGAAATCTAAATACCTCTTTCTTTGACCCAGCAGGTGGTGGAGACCCAATTCTTTACCAACACTTATTC
>1056_Hemicrepidius_coreanus_Yeongsil_JJ
AACACTTTACTTTTTATTTGGAGCCTGATCAGGAATATTAGGTACTTCACTTAGACTTCTAATCCGTGCAGAACTTGGAAACCCCGGCTCACTAATTGGGAATGACCAAATTTATAATGTTATTGTTACAGCTCATGCCTTTATCATAATTTTCTTTATAGTAATACCAATTATAATTGGAGGATTCGGTAACTGATTAGTCCCCTTAATACTAGGAGCCCCTGATATAGCCTTCCCTCGAATAAACAATATAAGATTCTGGTTTCTCCCTCCCTCTTTATCACTTTTACTAATAAGAAGAATTGTAGAAAATGGGGCAGGAACAGGCTGAACAGTTTACCCTCCTCTTTCGGCTAATATTGCTCATAGAGGATCCTCTGTAGACCTAGCAATTTTCAGTTTACACCTAGCCGGGATCTCCTCAATTCTAGGCGCAGTAAATTTTATTTCCACAGTAATTAATATACGATCAACCGGAATCACATTTGACCGAATACCTTTATTTGTATGAGCGGTAGCCATCACAGCTCTTTTACTTCTACTGTCCCTCCCTGTTCTTGCAGGAGCCATCACTATACTTCTAACTGACCGAAACCTAAATACCTCTTTCTTTGACCCAGCAGGTGGTGGAGACCCAATTCTTTACCAACACTTATTC
>1075_Hemicrepidius_coreanus_Yeongdong_JJ
AACACTTTACTTTTTATTTGGAGCCTGATCAGGAaTATTAGGTACTTCACTTAGACTTCTAATCCGTGCAGAACTTGGAAACCCCGGCTCACTAATTGGGAATGACCAAATTTATAATGTTATTGTTACAGCTCATGCCTTTATCATAATTTTCTTTATAGTAATACCAATTATAATTGGAGGATTCGGTAACTGATTAGTCCCCTTAATACTAGGAGCCCCTGATATAGCCTTCCCTCGAATAAACAATATAAGATTCTGGTTTCTCCCTCCCTCTTTATCACTTTTACTAATAAGAAGAATTGTAGAAAATGGGGCAGGAACAGGCTGAACAGTGTACCCTCCTCTTTCGGCTAATATTGCTCATAGAGGATCCTCTGTAGACCTAGCAATTTTCAGTTTACACCTAGCCGGGATCTCCTCAATTCTAGGCGCAGTAAATTTTATTTCCACAGTAATTAATATACGATCAACCGGAATCACATTTGACCGAATACCTTTATTTGTATGAGCAGTAGCCATCACAGCTCTTTTACTTCTACTGTCCCTCCCTGTTCTTGCAGGAGCCATCACTATACTTCTAACTGACCGAAATCTAAATACCTCTTTCTTTGACCCAGCAGGTGGTGGAGACCCAATTCTTTACCAACACTTATTC
>1076_Hemicrepidius_coreanus_Yeongdong_JJ
AACACTTTACTTTTTATTTGGAGCCTGATCAGGAATATTAGGTACTTCACTTAGACTTCTAATCCGTGCAGAACTTGGAAACCCCGGCTCACTAATTGGGAATGACCAAATTTATAATGTTATTGTTACAGCTCATGCCTTTATCATAATTTTCTTTATAGTAATACCAATTATAATTGGAGGATTCGGTAACTGATTAGTCCCCTTAATACTAGGAGCCCCTGATATAGCCTTCCCTCGAATAAACAATATAAGATTCTGGTTTCTCCCTCCCTCTTTATCACTTTTACTAATAAGAAGAATTGTAGAAAATGGGGCAGGAACAGGCTGAACAGTTTACCCTCCTCTTTCAGCTAATATTGCTCATAGAGGATCCTCTGTAGACCTAGCAATTTTCAGTTTACACCTAGCCGGGATCTCCTCAATTCTAGGCGCAGTAAATTTTATTTCCACAGTAATTAATATACGATCGACCGGAATCACATTTGACCGAATACCTTTATTTGTATGAGCGGTAGCCATCACAGCTCTTTTACTTCTACTGTCCCTCCCTGTTCTTGCAGGAGCCATCACTATACTTCTAACTGACCGAAATCTAAATACCTCTTTCTTTGACCCAGCAGGTGGTGGAGACCCAATTCTTTACCAACACTTATTC
>1077_Hemicrepidius_coreanus_Yeongdong_JJ
AACACTTTACTTTTTATTTGGAGCCTGATCAGGAaTATTAGGTACTTCACTTAGACTTCTAATCCGTGCAGAACTTGGAAACCCCGGCTCACTAATTGGGAATGACCAAATTTATAATGTTATTGTTACAGCTCATGCCTTTATCATAATTTTCTTTATAGTAATACCAATTATAATTGGAGGATTCGGTAACTGATTAGTCCCCTTAATACTAGGAGCCCCTGATATAGCCTTCCCTCGAATAAACAATATAAGATTCTGGTTTCTCCCTCCCTCTTTATCACTTTTACTAATAAGAAGAATTGTAGAAAATGGGGCAGGAACAGGCTGAACAGTTTACCCTCCTCTTTCGGCTAATATTGCTCATAGAGGATCCTCTGTAGACCTAGCAATTTTCAGTTTACACCTAGCCGGGATCTCCTCAATTCTAGGCGCAGTAAATTTTATTTCCACAGTAATTAATATACGATCAACCGGAATCACATTTGACCGAATACCTTTATTTGTATGAGCGGTAGCCATCACAGCTCTTTTACTTCTACTGTCCCTCCCTGTTCTTGCAGGAGCCATCACTATACTTCTAACTGACCGAAATCTAAATACCTCTTTCTTTGACCCAGCAGGTGGTGGAGACCCAATTCTTTACCAACACTTATTC
>1078_Hemicrepidius_coreanus_Yeongdong_JJ
AACACTTTACTTTTTATTTGGAGCCTGATCAGGAaTATTAGGTACTTCACTTAGACTTCTAATCCGTGCAGAACTTGGAAACCCCGGCTCACTAATTGGGAATGACCAAATTTATAATGTTATTGTTACAGCTCATGCCTTTATCATAATTTTCTTTATAGTAATACCAATTATAATTGGAGGATTCGGTAACTGATTAGTCCCCTTAATACTAGGAGCCCCTGATATAGCCTTCCCTCGAATAAACAATATAAGATTCTGGTTTCTCCCTCCCTCTTTATCACTTTTACTAATAAGAAGAATTGTAGAAAATGGGGCAGGAACAGGCTGAACAGTGTACCCTCCTCTTTCGGCTAATATTGCTCATAGAGGATCCTCTGTAGACCTAGCAATTTTCAGTTTACACCTAGCCGGGATCTCCTCAATTCTAGGCGCAGTAAATTTTATTTCCACAGTAATTAATATACGATCAACCGGAATCACATTTGACCGAATACCTTTATTTGTATGAGCAGTAGCCATCACAGCTCTTTTACTTCTACTGTCCCTCCCTGTTCTTGCAGGAGCCATCACTATACTTCTAACTGACCGAAATCTAAATACCTCTTTCTTTGACCCAGCAGGTGGTGGAGACCCAATTCTTTACCAACACTTATTC
>1079_Hemicrepidius_coreanus_Yeongdong_JJ
AACACTTTACTTTTTATTTGGAGCCTGATCAGGAATATTAGGTACTTCACTTAGACTTCTAATCCGTGCAGAACTTGGAAACCCCGGCTCACTAATTGGGAATGACCAAATTTATAATGTTATTGTTACAGCTCATGCCTTTATCATAATTTTCTTTATAGTAATACCAATTATAATTGGAGGATTCGGTAACTGATTAGTCCCCTTAATACTAGGAGCCCCTGATATAGCCTTCCCTCGAATAAACAATATAAGATTCTGGTTTCTCCCTCCCTCTTTATCACTTTTACTAATAAGAAGAATTGTAGAAAATGGGGCAGGAACAGGCTGAACAGTTTACCCTCCTCTTTCGGCTAATATTGCTCATAGAGGATCCTCTGTAGACCTAGCAATTTTCAGTTTACACCTAGCCGGGATCTCCTCAATTCTAGGCGCAGTAAATTTTATTTCCACAGTAATTAATATACGATCAACCGGAATCACATTTGACCGAATACCTTTATTTGTATGAGCGGTAGCCATCACAGCTCTTTTACTTCTACTGTCCCTCCCTGTTCTTGCAGGAGCCATCACTATACTTCTAACTGACCGAAATCTAAATACCTCTTTCTTTGACCCAGCAGGTGGTGGAGACCCAATTCTTTACCAACACTTATTC
>1080_Hemicrepidius_coreanus_Yeongdong_JJ
AACACTTTACTTTTTATTTGGAGCCTGATCAGGAATATTAGGTACTTCACTTAGACTTCTAATCCGTGCAGAACTTGGAAACCCCGGCTCACTAATTGGGAATGACCAAATTTATAATGTTATTGTTACAGCTCATGCCTTTATCATAATTTTCTTTATAGTAATACCAATTATAATTGGAGGATTCGGTAACTGATTAGTCCCCTTAATACTAGGAGCCCCTGATATAGCCTTCCCTCGAATAAACAATATAAGATTCTGGTTTCTCCCTCCCTCTTTATCACTTTTACTAATAAGAAGAATTGTAGAAAATGGGGCAGGAACAGGCTGAACAGTTTACCCTCCTCTTTCGGCTAATATTGCTCATAGAGGATCCTCTGTAGACCTAGCAATTTTCAGTTTACACCTAGCCGGGATCTCCTCAATTCTAGGCGCAGTAAATTTTATTTCCACAGTAATTAATATACGATCAACCGGAATCACATTTGACCGAATACCTTTATTTGTATGAGCGGTAGCCATCACAGCTCTTTTACTTCTACTGTCCCTCCCTGTTCTTGCAGGAGCCATCACTATACTTCTAACTGACCGAAATCTAAATACCTCTTTCTTTGACCCAGCAGGTGGTGGAGACCCAATTCTTTACCAACACTTATTC
>1081_Hemicrepidius_coreanus_Yeongdong_JJ
AACACTTTACTTTTTATTTGGAGCCTGATCAGGAATATTAGGTACTTCACTTAGACTTCTAATCCGTGCAGAACTTGGAAACCCCGGCTCACTAATTGGGAATGACCAAATTTATAATGTTATTGTTACAGCTCATGCCTTTATCATAATTTTCTTTATAGTAATACCAATTATAATTGGAGGATTCGGTAACTGATTAGTCCCCTTAATACTAGGAGCCCCTGATATAGCCTTCCCTCGAATAAACAATATAAGATTCTGGTTTCTCCCTCCCTCTTTATCACTTTTACTAATAAGAAGAATTGTAGAAAATGGGGCAGGAACAGGCTGAACAGTTTACCCTCCTCTTTCGGCTAATATTGCTCATAGAGGATCCTCTGTAGACCTAGCAATTTTCAGTTTACACCTAGCCGGGATCTCCTCAATTCTAGGCGCAGTAAATTTTATTTCCACAGTAATTAATATACGATCAACCGGAATCACATTTGACCGAATACCTTTATTTGTATGAGCGGTAGCCATCACAGCTCTTTTACTTCTACTGTCCCTCCCTGTTCTTGCAGGAGCCATCACTATACTTCTAACTGACCGAAATCTAAATACCTCTTTCTTTGACCCAGCAGGTGGTGGAGACCCAATTCTTTACCAACACTTATTC
>1082_Hemicrepidius_coreanus_Yeongdong_JJ
AACACTTTACTTTTTATTTGGAGCCTGATCAGGAaTATTAGGTACTTCACTTAGACTTCTAATCCGTGCAGAACTTGGAAACCCCGGCTCACTAATTGGGAATGACCAAATTTATAATGTTATTGTTACAGCTCATGCCTTTATCATAATTTTCTTTATAGTAATACCAATTATAATTGGAGGATTCGGTAACTGATTAGTCCCCTTAATACTAGGAGCCCCTGATATAGCCTTCCCTCGAATAAACAATATAAGATTCTGGTTTCTCCCTCCCTCTTTATCACTTTTACTAATAAGAAGAATTGTAGAAAATGGGGCAGGAACAGGCTGAACAGTTTACCCTCCTCTTTCGGCTAATATTGCTCATAGAGGATCCTCTGTAGACCTAGCAATTTTCAGTTTACACCTAGCCGGGATCTCCTCAATTCTAGGCGCAGTAAATTTTATTTCCACAGTAATTAATATACGATCAACCGGAATCACATTTGACCGAATACCTTTATTTGTATGAGCGGTAGCCATCACAGCTCTTTTACTTCTACTGTCCCTCCCTGTTCTTGCAGGAGCCATCACTATACTTCTAACTGACCGAAATCTAAATACCTCTTTCTTTGACCCAGCAGGTGGTGGAGACCCAATTCTTTACCAACACTTATTC
>1083_Hemicrepidius_coreanus_Yeongdong_JJ
AACACTTTACTTTTTATTTGGAGCCTGATCAGGAATATTAGGTACTTCACTTAGACTTCTAATCCGTGCAGAACTTGGAAACCCCGGCTCACTAATTGGGAATGACCAAATTTATAATGTTATTGTTACAGCTCATGCCTTTATCATAATTTTCTTTATAGTAATACCAATTATAATTGGAGGATTCGGTAACTGATTAGTCCCCTTAATACTAGGAGCCCCTGATATAGCCTTCCCTCGAATAAACAATATAAGATTCTGGTTTCTCCCTCCCTCTTTATCACTTTTACTAATAAGAAGAATTGTAGAAAATGGGGCAGGAACAGGCTGAACAGTTTACCCTCCTCTTTCGGCTAATATTGCTCATAGAGGATCCTCTGTAGACCTAGCAATTTTCAGTTTACACCTAGCCGGGATCTCCTCAATTCTAGGCGCAGTAAATTTTATTTCCACAGTAATTAATATACGATCAACCGGAATCACATTTGACCGAATACCTTTATTTGTATGAGCGGTAGCCATCACAGCTCTTTTACTTCTACTGTCCCTCCCTGTTCTTGCAGGAGCCATCACTATACTTCTAACTGACCGAAATCTAAATACCTCTTTCTTTGACCCAGCAGGTGGTGGAGACCCAATTCTTTACCAACACTTATTC
>1084_Hemicrepidius_coreanus_Yeongdong_JJ
AACACTTTACTTTTTATTTGGAGCCTGATCAGGAaTATTAGGTACTTCACTTAGACTTCTAATCCGTGCAGAACTTGGAAACCCCGGCTCACTAATTGGGAATGACCAAATTTATAATGTTATTGTTACAGCTCATGCCTTTATCATAATTTTCTTTATAGTAATACCAATTATAATTGGAGGATTCGGTAACTGATTAGTCCCCTTAATACTAGGAGCCCCTGATATAGCCTTCCCTCGAATAAACAATATAAGATTCTGGTTTCTCCCTCCCTCTTTATCACTTTTACTAATAAGAAGAATTGTAGAAAATGGGGCAGGAACAGGCTGAACAGTTTACCCTCCTCTTTCGGCTAATATTGCTCATAGAGGATCCTCTGTAGACCTAGCAATTTTCAGTTTACACCTAGCCGGGATCTCCTCAATTCTAGGCGCAGTAAATTTTATTTCCACAGTAATTAATATACGATCAACCGGAATCACATTTGACCGAATACCTTTATTTGTATGAGCGGTAGCCATCACAGCTCTTTTACTTCTACTGTCCCTCCCTGTTCTTGCAGGAGCCATCACTATACTTCTAACTGACCGAAATCTAAATACCTCTTTCTTTGACCCAGCAGGTGGTGGAGACCCAATTCTTTACCAACACTTATTC
>1085_Hemicrepidius_coreanus_Yeongdong_JJ
AACACTTTACTTTTTATTTGGAGCCTGATCAGGAATATTAGGTACTTCACTTAGACTTCTAATCCGTGCAGAACTTGGAAACCCCGGCTCACTAATTGGGAATGACCAAATTTATAATGTTATTGTTACAGCTCATGCCTTTATCATAATTTTCTTTATAGTAATACCAATTATAATTGGAGGATTCGGTAACTGATTAGTCCCCTTAATACTAGGAGCCCCTGATATAGCCTTCCCTCGAATAAACAATATAAGATTCTGGTTTCTCCCTCCCTCTTTATCACTTTTACTAATAAGAAGAATTGTAGAAAATGGGGCAGGAACAGGCTGAACAGTGTACCCTCCTCTTTCGGCTAATATTGCTCATAGAGGATCCTCTGTAGACCTAGCAATTTTCAGTTTACACCTAGCCGGGATCTCCTCAATTCTAGGCGCAGTAAATTTTATTTCCACAGTAATTAATATACGATCAACCGGAATCACATTTGACCGAATACCTTTATTTGTATGAGCAGTAGCCATCACAGCTCTTTTACTTCTACTGTCCCTCCCTGTTCTTGCAGGAGCCATCACTATACTTCTAACTGACCGAAATCTAAATACCTCTTTCTTTGACCCAGCAGGTGGTGGAGACCCAATTCTTTACCAACACTTATTC
>1086_Hemicrepidius_coreanus_Yeongdong_JJ
AACACTTTACTTTTTATTTGGAGCCTGATCAGGAATATTAGGTACTTCACTTAGACTTCTAATCCGTGCAGAACTTGGAAACCCCGGCTCACTAATTGGGAATGACCAAATTTATAATGTTATTGTTACAGCTCATGCCTTTATCATAATTTTCTTTATAGTAATACCAATTATAATTGGAGGATTCGGTAACTGATTAGTCCCCTTAATACTAGGAGCCCCTGATATAGCCTTCCCTCGAATAAACAATATAAGATTCTGGTTTCTCCCTCCCTCTTTATCACTTTTACTAATAAGAAGAATTGTAGAAAATGGGGCAGGAACAGGCTGAACAGTTTACCCTCCTCTTTCGGCTAATATTGCTCATAGAGGATCCTCTGTAGACCTAGCAATTTTCAGTTTACACCTAGCCGGGATCTCCTCAATTCTAGGCGCAGTAAATTTTATTTCTACAGTAATTAATATACGATCAACCGGAATCACATTTGACCGAATACCTTTATTTGTATGAGCAGTAGCCATCACAGCTCTTTTACTTCTACTGTCCCTCCCTGTTCTTGCAGGAGCCATCACTATACTTCTAACTGACCGAAATCTAAATACCTCTTTCTTTGACCCAGCAGGTGGTGGAGACCCAATTCTTTACCAACACTTATTC
>1087_Hemicrepidius_coreanus_Yeongdong_JJ
AACACTTTACTTTTTATTTGGAGCCTGATCAGGAATATTAGGTACTTCACTTAGACTTCTAATCCGTGCAGAACTTGGAAACCCCGGCTCACTAATTGGGAATGACCAAATTTATAATGTTATTGTTACAGCTCATGCCTTTATCATAATTTTCTTTATAGTAATACCAATTATAATTGGAGGATTCGGTAACTGATTAGTCCCCTTAATACTAGGAGCCCCTGATATAGCCTTCCCTCGAATAAACAATATAAGATTCTGGTTTCTCCCTCCCTCTTTATCACTTTTACTAATAAGAAGAATTGTAGAAAATGGGGCAGGAACAGGCTGAACAGTGTACCCTCCTCTTTCGGCTAATATTGCTCATAGAGGATCCTCTGTAGACCTAGCAATTTTCAGTTTACACCTAGCCGGGATCTCCTCAATTCTAGGCGCAGTAAATTTTATTTCCACAGTAATTAATATACGATCAACCGGAATCACATTTGACCGAATACCTTTATTTGTATGAGCAGTAGCCATCACAGCTCTTTTACTTCTACTGTCCCTCCCTGTTCTTGCAGGAGCCATCACTATACTTCTAACTGACCGAAATCTAAATACCTCTTTCTTTGACCCAGCAGGTGGTGGAGACCCAATTCTTTACCAACACTTATTC
>1088_Hemicrepidius_coreanus_Yeongdong_JJ
AACACTTTACTTTTTATTTGGAGCCTGATCAGGAaTATTAGGTACTTCACTTAGACTTCTAATCCGTGCAGAACTTGGAAACCCCGGCTCACTAATTGGGAATGACCAAATTTATAATGTTATTGTTACAGCTCATGCCTTTATCATAATTTTCTTTATAGTAATACCAATTATAATTGGAGGATTCGGTAACTGATTAGTCCCCTTAATACTAGGAGCCCCTGATATAGCCTTCCCTCGAATAAACAATATAAGATTCTGGTTTCTCCCTCCCTCTTTATCACTTTTACTAATAAGAAGAATTGTAGAAAATGGGGCAGGAACAGGCTGAACAGTTTACCCTCCTCTTTCGGCTAACATTGCTCATAGAGGATCCTCTGTAGACCTAGCAATTTTCAGTTTACACCTAGCCGGGATCTCCTCAATTCTAGGCGCAGTAAATTTTATTTCCACAGTAATTAATATACGATCAACCGGAATCACATTTGACCGAATACCTTTATTTGTATGAGCGGTAGCCATCACAGCTCTTTTACTTCTACTGTCCCTCCCTGTTCTTGCAGGAGCCATCACTATACTTCTAACTGACCGAAATCTAAATACCTCTTTCTTTGACCCAGCAGGTGGTGGAGACCCAATTCTTTACCAACACTTATTC
>1089_Hemicrepidius_coreanus_Yeongdong_JJ
AACACTTTACTTTTTATTTGGAGCCTGATCAGGAaTATTAGGTACTTCACTTAGACTTCTAATCCGTGCAGAACTTGGAAACCCCGGCTCACTAATTGGGAATGACCAAATTTATAATGTTATTGTTACAGCTCATGCCTTTATCATAATTTTCTTTATAGTAATACCAATTATAATTGGAGGATTTGGTAACTGATTAGTCCCCTTAATACTAGGAGCCCCTGATATAGCCTTCCCTCGAATAAACAATATAAGATTCTGGTTTCTCCCCCCCTCTTTATCACTTTTACTAATAAGAAGAATTGTAGAAAATGGGGCAGGAACAGGCTGAACAGTTTACCCTCCTCTTTCGGCTAATATTGCTCATAGAGGATCCTCTGTAGACCTAGCAATTTTCAGTTTACACCTAGCCGGGATCTCCTCAATTCTAGGCGCAGTAAATTTTATTTCCACAGTAATTAATATACGATCAACCGGAATCACATTTGACCGAATACCTTTATTTGTATGAGCGGTAGCCATCACAGCTCTTTTACTTCTACTGTCCCTCCCTGTTCTTGCAGGAGCCATCACTATACTTCTAACTGACCGAAATCTAAATACCTCTTTCTTTGACCCAGCAGGTGGTGGAGACCCAATTCTTTACCAACACTTATTC
>1090_Hemicrepidius_coreanus_Yeongdong_JJ
AACACTTTACTTTTTATTTGGAGCCTGATCAGGAATATTAGGTACTTCACTTAGACTTCTAATCCGTGCAGAACTTGGAAACCCCGGCTCACTAATTGGGAATGACCAAATTTATAATGTTATTGTTACAGCTCATGCCTTTATCATAATTTTCTTTATAGTAATACCAATTATAATTGGAGGATTCGGTAACTGATTAGTCCCCTTAATACTAGGAGCCCCTGATATAGCCTTCCCTCGAATAAACAATATAAGATTCTGGTTTCTCCCTCCCTCTTTATCACTTTTACTAATAAGAAGAATTGTAGAAAATGGGGCAGGAACAGGCTGAACAGTTTACCCTCCTCTTTCGGCTAATATTGCTCATAGAGGATCCTCTGTAGACCTAGCAATTTTCAGTTTACACCTAGCCGGGATCTCCTCAATTCTAGGCGCAGTAAATTTTATTTCCACAGTAATTAATATACGATCAACCGGAATCACATTTGACCGAATACCTTTATTTGTATGAGCGGTAGCCATCACAGCTCTTTTACTTCTACTGTCCCTCCCTGTTCTTGCAGGAGCCATCACTATACTTCTAACTGACCGAAATCTAAATACCTCTTTCTTTGACCCAGCAGGTGGTGGAGACCCAATTCTTTACCAACACTTATTC
>1091_Hemicrepidius_coreanus_Yeongdong_JJ
AACACTTTACTTTTTATTTGGAGCCTGATCAGGAATATTAGGTACTTCACTTAGACTTCTAATCCGTGCAGAACTTGGAAACCCCGGCTCACTAATTGGGAATGACCAAATTTATAATGTTATTGTTACAGCTCATGCCTTTATCATAATTTTCTTTATAGTAATACCAATTATAATTGGAGGATTCGGTAACTGATTAGTCCCCTTAATACTAGGAGCCCCTGATATAGCCTTCCCTCGAATAAACAACATAAGATTCTGGTTTCTCCCTCCCTCTTTATCACTTTTACTAATAAGAAGAATTGTAGAAAATGGGGCAGGAACAGGCTGAACAGTTTACCCTCCTCTTTCAGCTAATATTGCTCATAGAGGATCCTCTGTAGACCTAGCAATTTTCAGTTTACACCTAGCCGGGATCTCCTCAATTCTAGGCGCAGTAAATTTTATTTCCACAGTAATTAATATACGATCAACCGGAATCACATTTGACCGAATACCTTTATTTGTATGAGCGGTAGCCATCACAGCTCTTTTACTTCTACTGTCCCTCCCTGTTCTTGCAGGAGCCATCACTATACTTCTAACTGACCGAAATCTAAATACCTCTTTCTTTGACCCAGCAGGTGGTGGAGACCCAATTCTTTACCAACACTTATTC
>1092_Hemicrepidius_coreanus_Yeongdong_JJ
AACACTTTACTTTTTATTTGGAGCCTGATCAGGAaTATTAGGTACTTCACTTAGACTTCTAATCCGTGCAGAACTTGGAAACCCCGGCTCACTAATTGGGAATGACCAAATTTATAATGTTATTGTTACAGCTCATGCCTTTATCATAATTTTCTTTATAGTAATACCAATTATAATTGGAGGATTCGGTAACTGATTAGTCCCCTTAATACTAGGAGCCCCTGATATAGCCTTCCCTCGAATAAACAATATAAGATTCTGGTTTCTCCCTCCCTCTTTATCACTTTTACTAATAAGAAGAATTGTAGAAAATGGGGCAGGAACAGGCTGAACAGTTTACCCTCCTCTTTCGGCTAATATTGCTCATAGAGGATCCTCTGTAGACCTAGCAATTTTCAGTTTACACCTAGCCGGGATCTCCTCAATTCTAGGCGCAGTAAATTTTATTTCCACAGTAATTAATATACGATCAACCGGAATCACATTTGACCGAATACCTTTATTTGTATGAGCGGTAGCCATCACAGCTCTTTTACTTCTTCTGTCCCTCCCTGTTCTTGCAGGAGCCATCACTATACTTCTAACTGACCGAAATCTAAATACCTCTTTCTTTGACCCAGCAGGTGGTGGAGACCCAATTCTTTACCAACACTTATTC
>1093_Hemicrepidius_coreanus_Yeongdong_JJ
AACACTTTACTTTTTATTTGGAGCCTGATCAGGAATATTAGGTACTTCACTTAGACTTCTAATCCGTGCAGAACTTGGAAACCCCGGCTCACTAATTGGGAATGACCAAATTTATAATGTTATTGTTACAGCTCATGCCTTTATCATAATTTTCTTTATAGTAATACCAATTATAATTGGAGGATTCGGTAACTGATTAGTCCCCTTAATACTAGGAGCCCCTGATATAGCCTTCCCTCGAATAAACAATATAAGATTCTGGTTTCTCCCTCCCTCTTTATCACTTTTACTAATAAGAAGAATTGTAGAAAATGGGGCAGGAACAGGCTGAACAGTTTACCCTCCTCTTTCGGCTAATATTGCTCATAGAGGATCCTCTGTAGACCTAGCAATTTTCAGTTTACACCTAGCCGGGATCTCCTCAATTCTAGGCGCAGTAAATTTTATTTCCACAGTAATTAATATACGATCGACCGGAATCACATTTGACCGAATACCTTTATTTGTATGAGCGGTAGCCATCACAGCTCTTTTACTTCTACTGTCCCTCCCTGTTCTTGCAGGAGCCATCACTATACTTCTAACTGACCGAAATCTAAATACCTCTTTCTTTGACCCAGCAGGTGGTGGAGACCCAATTCTTTACCAACACTTATTC
>2722_Hemicrepidius_coreanus_Seoquipo_JJ
AACACTTTACTTTTTATTTGGAGCCTGATCAGGAATATTAGGTACTTCACTTAGACTTCTAATCCGTGCAGAACTTGGAAACCCCGGCTCACTAATTGGGAATGACCAAATTTATAATGTTATTGTTACAGCTCATGCCTTTATCATAATTTTCTTTATAGTAATACCAATTATAATTGGAGGATTCGGTAACTGATTAGTCCCCTTAATACTAGGAGCCCCTGATATAGCCTTCCCTCGAATAAACAATATAAGATTCTGGTTTCTCCCTCCCTCTTTATCACTTTTACTAATAAGAAGAATTGTAGAAAATGGGGCAGGAACAGGCTGAACAGTTTACCCTCCTCTTTCGGCTAATATTGCTCATAGAGGATCCTCTGTAGACCTAGCAATTTTCAGTTTACACCTAGCCGGGATCTCCTCAATTCTAGGCGCAGTAAATTTTATTTCCACAGTAATTAATATACGATCAACCGGAATCACATTTGACCGAATACCTTTATTTGTATGAGCGGTAGCCATCACAGCTCTTTTACTTCTACTGTCCCTCCCTGTTCTTGCAGGAGCCATCACTATACTTCTAACTGACCGAAATCTAAATACCTCTTTCTTTGACCCAGCAGGTGGTGGAGACCCAATTCTTTACCAACACTTATTC
>2734_Hemicrepidius_coreanus_Gwaneumsa_JJ
AACACTTTACTTTTTATTTGGAGCCTGATCAGGAATATTAGGTACTTCACTTAGACTTCTAATCCGTGCAGAACTTGGAAACCCCGGCTCACTAATTGGGAATGACCAAATTTATAATGTTATTGTTACAGCTCATGCCTTTATCATAATTTTCTTTATAGTAATACCAATTATAATTGGAGGATTCGGTAACTGATTAGTCCCCTTAATACTAGGAGCCCCTGATATAGCCTTCCCTCGAATAAACAATATAAGATTCTGGTTTCTCCCTCCCTCTTTATCACTTTTACTAATAAGAAGAATTGTAGAAAATGGGGCAGGAACAGGCTGAACAGTTTACCCTCCTCTTTCGGCTAATATTGCTCATAGAGGATCCTCTGTAGACCTAGCAATTTTCAGTTTACACCTAGCCGGGATCTCCTCAATTCTAGGCGCAGTAAATTTTATTTCCACAGTAATTAATATACGATCGACCGGAATCACATTTGACCGAATACCTTTATTTGTATGAGCGGTAGCCATCACAGCTCTTTTACTTCTACTGTCCCTCCCTGTTCTTGCAGGAGCCATCACTATACTTCTAACTGACCGAAATCTAAATACCTCTTTCTTTGACCCAGCAGGTGGTGGAGACCCAATTCTTTACCAACACTTATTC
>2735_Hemicrepidius_coreanus_Gwaneumsa_JJ
AACACTTTACTTTTTATTTGGAGCCTGATCAGGAATATTAGGTACTTCACTTAGACTTCTAATCCGTGCAGAACTTGGAAACCCCGGCTCACTAATTGGGAATGACCAAATTTATAATGTTATTGTTACAGCTCATGCCTTTATCATAATTTTCTTTATAGTAATACCAATTATAATTGGAGGATTCGGTAACTGATTAGTCCCCTTAATACTAGGAGCCCCTGATATAGCCTTCCCTCGAATAAACAATATAAGATTCTGGTTTCTCCCTCCCTCTTTATCACTTTTACTAATAAGAAGAATTGTAGAAAATGGGGCAGGAACAGGCTGAACAGTTTACCCTCCTCTTTCGGCTAATATTGCTCATAGAGGATCCTCTGTAGACCTAGCAATTTTCAGTTTACACCTAGCCGGGATCTCCTCAATTCTAGGCGCAGTAAATTTTATTTCCACAGTAATTAATATACGATCAACCGGAATCACATTTGACCGAATACCTCTATTTGTATGAGCAGTAGCCATCACAGCTCTTTTACTTCTACTGTCCCTCCCTGTTCTTGCAGGAGCCATCACTATACTTCTAACTGACCGAAATCTAAATACCTCTTTCTTTGACCCAGCAGGTGGTGGAGACCCAATTCTTTACCAACACTTATTC
>2736_Hemicrepidius_coreanus_Gwaneumsa_JJ
AACACTTTACTTTTTATTTGGAGCCTGATCAGGAATATTAGGTACTTCACTTAGACTTCTAATCCGTGCAGAACTTGGAAACCCCGGCTCACTAATTGGGAATGACCAAATTTATAATGTTATTGTTACAGCTCATGCCTTTATCATAATTTTCTTTATAGTAATACCAATTATAATTGGAGGATTCGGTAACTGATTAGTCCCCTTAATACTAGGAGCCCCTGATATAGCCTTCCCTCGAATAAACAATATAAGATTCTGGTTTCTCCCTCCCTCTTTATCACTTTTACTAATAAGAAGAATTGTAGAAAATGGGGCAGGAACAGGCTGAACAGTTTACCCTCCTCTTTCGGCTAATATTGCTCATAGAGGATCCTCTGTAGACCTAGCAATTTTCAGTTTACACCTAGCCGGGATCTCCTCAATTCTAGGCGCAGTAAATTTTATTTCCACAGTAATTAATATACGATCAACCGGAATCACATTTGACCGAATACCTTTATTTGTATGAGCGGTAGCCATCACAGCTCTTTTACTTCTACTGTCCCTCCCTGTTCTTGCAGGAGCCATCACTATACTTCTAACTGACCGAAATCTAAATACCTCTTTCTTTGACCCAGCAGGTGGTGGAGACCCAATTCTTTACCAACACTTATTC
>2756_Hemicrepidius_coreanus_Dongbaekpark_JJ
AACACTTTACTTTTTATTTGGAGCCTGATCAGGAATATTAGGTACTTCACTTAGACTTCTAATCCGTGCAGAACTTGGAAACCCCGGCTCACTAATTGGGAATGACCAAATTTATAATGTTATTGTTACAGCTCATGCCTTTATCATAATTTTCTTTATAGTAATACCAATTATAATTGGAGGATTCGGTAACTGATTAGTCCCCTTAATACTAGGAGCCCCTGATATAGCCTTCCCTCGAATAAACAATATAAGATTCTGGTTTCTCCCTCCCTCTTTATCACTTTTACTAATAAGAAGAATTGTAGAAAATGGGGCAGGAACAGGCTGAACAGTTTACCCTCCTCTTTCGGCTAATATTGCTCATAGAGGATCCTCTGTAGACCTAGCAATTTTCAGTTTACACCTAGCCGGGATCTCCTCAATTCTAGGCGCAGTAAATTTTATTTCCACAGTAATTAATATACGATCAACCGGAATCACATTTGACCGAATACCTTTATTTGTATGAGCGGTAGCCATCACAGCTCTTTTACTTCTACTGTCCCTCCCTGTTCTTGCAGGAGCCATCACTATACTTCTAACTGACCGAAATCTAAATACCTCTTTCTTTGACCCAGCAGGTGGTGGAGACCCAATTCTTTACCAACACTTATTC
>2757_Hemicrepidius_coreanus_Dongbaekpark_JJ
AACACTTTACTTTTTATTTGGAGCCTGATCAGGAATATTAGGTACTTCACTTAGACTTCTAATCCGTGCAGAACTTGGAAACCCCGGCTCACTAATTGGGAATGACCAAATTTATAATGTTATTGTTACAGCTCATGCCTTTATCATAATTTTCTTTATAGTAATACCAATTATAATTGGGGGATTCGGTAACTGATTAGTCCCCTTAATACTAGGAGCCCCTGATATAGCCTTCCCTCGAATAAACAATATAAGATTCTGGTTTCTCCCTCCCTCTTTATCACTTTTACTAATAAGAAGAATTGTAGAAAATGGGGCAGGAACAGGCTGAACAGTTTACCCCCCTCTTTCGGCTAATATTGCTCATAGAGGATCCTCTGTAGACCTAGCAATTTTCAGTTTACACCTAGCCGGGATCTCCTCAATTCTAGGCGCAGTAAATTTTATTTCCACAGTAATTAATATACGATCAACCGGAATCACATTTGACCGAATACCTTTATTTGTATGAGCGGTAGCCATCACAGCTCTTTTACTTCTACTGTCCCTCCCTGTTCTTGCAGGAGCCATCACTATACTTCTAACTGACCGAAATCTAAATACCTCTTTCTTTGACCCAGCAGGTGGTGGAGACCCAATTCTTTACCAACACTTATTC
>2758_Hemicrepidius_coreanus_Dongbaekpark_JJ
AACACTTTACTTTTTATTTGGAGCCTGATCAGGAATATTAGGTACTTCACTTAGACTTCTAATCCGTGCAGAACTTGGAAACCCCGGCTCACTAATTGGGAATGACCAAATTTATAATGTTATTGTTACAGCTCATGCCTTTATCATAATTTTCTTTATAGTAATACCAATTATAATTGGGGGATTCGGTAACTGGTTAGTCCCCTTAATACTAGGGGCCCCTGATATAGCCTTCCCTCGAATAAACAATATAAGATTCTGGTTTCTCCCTCCCTCTTTATCACTTTTACTAATAAGAAGAATTGTAGAAAATGGGGCAGGAACAGGCTGAACAGTTTACCCCCCTCTTTCGGCTAATATTGCTCATAGAGGGTCCTCTGTAGACCTAGCAATTTTCAGTTTACACCTAGCCGGGATCTCCTCAATTCTAGGCGCAGTAAATTTTATTTCCACAGTAATTAATATACGATCAACCGGAATCACATTTGACCGAATACCTTTATTTGTATGAGCGGTAGCCATCACAGCTCTTTTACTTCTACTGTCCCTCCCTGTTCTTGCAGGAGCCATCACTATACTTCTAACTGACCGAAATCTAAATACCTCTTTCTTTGACCCAGCAGGTGGTGGAGACCCAATTCTTTACCAACACTTATTC
>2759_Hemicrepidius_coreanus_Dongbaekpark_JJ
AACACTTTACTTTTTATTTGGAGCCTGATCAGGAATATTAGGTACTTCACTTAGACTTCTAATCCGTGCAGAACTTGGAAACCCCGGCTCACTAATTGGGAATGACCAAATTTATAATGTTATTGTTACAGCTCATGCCTTTATCATAATTTTCTTTATAGTAATACCAATTATAATTGGGGGATTCGGTAACTGGTTAGTCCCCTTAATACTAGGAGCCCCTGATATAGCCTTCCCTCGAATAAACAATATAAGATTCTGGTTTCTCCCTCCCTCTTTATCACTTTTACTAATAAGAAGAATTGTAGAAAATGGGGCAGGAACAGGCTGAACAGTTTACCCCCCTCTTTCGGCTAATATTGCTCATAGAGGGTCCTCTGTAGACCTAGCAATTTTCAGTTTACACCTAGCCGGGATCTCCTCAATTCTAGGCGCAGTAAATTTTATTTCCACAGTAATTAATATACGATCAACCGGAATCACATTTGACCGAATACCTTTATTTGTATGAGCGGTAGCCATCACAGCTCTTTTACTTCTACTGTCCCTCCCTGTTCTTGCAGGAGCCATCACTATACTTCTAACTGACCGAAATCTAAATACCTCTTTCTTTGACCCAGCAGGTGGTGGAGACCCAATTCTTTACCAACACTTATTC
>2760_Hemicrepidius_coreanus_Dongbaekpark_JJ
AACACTTTACTTTTTATTTGGAGCCTGATCAGGAATATTAGGTACTTCACTTAGACTTCTAATCCGTGCAGAACTTGGAAACCCCGGCTCACTAATTGGGAATGACCAAATTTATAATGTTATTGTTACAGCTCATGCCTTTATCATAATTTTCTTTATAGTAATACCAATTATAATTGGGGGATTCGGTAACTGGTTAGTCCCCTTAATACTAGGAGCCCCTGATATAGCCTTCCCTCGAATAAACAATATAAGATTCTGGTTTCTCCCTCCCTCTTTATCACTTTTACTAATAAGAAGAATTGTAGAAAATGGAGCAGGAACAGGCTGAACAGTTTACCCCCCTCTTTCGGCTAATATTGCTCATAGAGGATCCTCTGTAGACCTAGCAATTTTCAGTTTACACCTAGCCGGGATCTCCTCAATTCTAGGCGCAGTAAATTTTATTTCCACAGTAATTAATATACGATCAACCGGAATCACATTTGACCGAATACCTTTATTTGTATGAGCGGTAGCCATCACAGCTCTTTTACTTCTACTGTCCCTCCCTGTTCTTGCAGGAGCCATCACTATACTTCTAACTGACCGAAATCTAAATACCTCTTTCTTTGACCCAGCAGGTGGTGGAGACCCAATTCTTTACCAACACTTATTC
>2761_Hemicrepidius_coreanus_Dongbaekpark_JJ
AACACTTTACTTTTTATTTGGAGCCTGATCAGGAATATTAGGTACTTCACTTAGACTTCTAATCCGTGCAGAACTTGGAAACCCCGGCTCACTAATTGGGAATGACCAAATTTATAATGTTATTGTTACAGCTCATGCCTTTATCATAATTTTCTTTATAGTAATACCAATTATAATTGGAGGATTCGGTAACTGATTAGTCCCCTTAATACTAGGAGCCCCTGATATAGCCTTCCCTCGAATAAACAATATAAGATTCTGGTTTCTCCCTCCCTCTTTATCACTTTTACTAATAAGAAGAATTGTAGAAAATGGGGCAGGAACAGGCTGAACAGTTTACCCTCCTCTTTCGGCTAATATTGCTCATAGAGGATCCTCTGTAGACCTAGCAATTTTCAGTTTACACCTAGCCGGGATCTCCTCAATTCTAGGCGCAGTAAATTTTATTTCCACAGTAATTAATATACGATCAACCGGAATCACATTTGACCGAATACCTTTATTTGTATGAGCGGTAGCCATCACAGCTCTTTTACTTCTACTGTCCCTCCCTGTTCTTGCAGGAGCCATCACTATACTTCTAACTGACCGAAATCTAAATACCTCTTTCTTTGACCCAGCAGGTGGTGGAGACCCAATTCTTTACCAACACTTATTC
>2764_Hemicrepidius_coreanus_Dongbaekpark_JJ
AACACTTTACTTTTTATTTGGAGCCTGATCAGGAATATTAGGTACTTCACTTAGACTTCTAATCCGCGCAGAACTTGGAAACCCCGGCTCACTAATTGGGAATGACCAAATTTATAATGTTATTGTTACAGCTCATGCCTTTATCATAATTTTCTTTATAGTAATACCAATTATAATTGGAGGATTCGGTAACTGATTAGTCCCCTTAATACTAGGAGCCCCTGATATAGCCTTCCCTCGAATAAACAATATAAGATTCTGGTTTCTCCCTCCCTCTTTATCACTTTTACTAATAAGAAGAATTGTAGAAAATGGAGCAGGAACAGGCTGAACAGTTTACCCTCCTCTTTCGGCTAATATTGCTCATAGAGGATCCTCTGTAGACCTAGCAATTTTCAGTTTACACCTAGCCGGGATCTCCTCAATTCTAGGCGCAGTAAATTTTATTTCCACAGTAATTAATATACGATCAACCGGAATCACATTTGACCGAATACCTTTATTTGTATGAGCGGTAGCCATCACAGCTCTTTTACTTCTACTGTCCCTCCCTGTCCTTGCAGGAGCCATCACTATACTTCTAACTGACCGAAATCTAAATACCTCTTTCTTTGACCCAGCCGGTGGTGGAGACCCAATTCTTTACCAACACTTATTC
>2765_Hemicrepidius_coreanus_Dongbaekpark_JJ
AACACTTTACTTTTTATTTGGAGCCTGATCAGGAATATTAGGTACTTCACTTAGACTTCTAATCCGTGCAGAACTTGGAAACCCCGGCTCACTAATTGGGAATGACCAAATTTATAATGTTATTGTTACAGCTCATGCCTTTATCATAATTTTCTTTATAGTAATACCAATTATAATTGGAGGATTCGGTAACTGGTTAGTCCCCTTAATACTAGGAGCCCCTGATATAGCCTTCCCTCGAATAAACAATATAAGATTCTGGTTTCTCCCTCCCTCTTTATCACTTTTACTAATAAGAAGAATTGTAGAAAATGGGGCAGGAACAGGCTGAACAGTTTACCCCCCTCTTTCGGCTAATATTGCTCATAGAGGGTCCTCTGTAGACCTAGCAATTTTCAGTTTACACCTAGCCGGGATCTCCTCAATTCTAGGCGCAGTAAATTTTATTTCCACAGTAATTAATATACGATCAACCGGAATCACATTTGACCGAATACCTTTATTTGTATGAGCGGTAGCCATCACAGCTCTTTTACTTCTACTGTCCCTCCCTGTTCTTGCAGGAGCCATCACTATACTTCTAACTGACCGAAATCTAAATACCTCTTTCTTTGACCCAGCAGGTGGTGGAGACCCAATTCTTTACCAACACTTATTC
>2766_Hemicrepidius_coreanus_Dongbaekpark_JJ
AACACTTTACTTTTTATTTGGAGCCTGATCAGGAATATTAGGTACTTCACTTAGACTTCTAATCCGTGCAGAACTTGGAAACCCCGGCTCACTAATTGGGAATGACCAAATTTATAATGTTATTGTTACAGCTCATGCCTTTATCATAATTTTCTTTATAGTAATACCAATTATAATTGGAGGATTCGGTAACTGATTAGTCCCCTTAATACTAGGAGCCCCTGATATAGCCTTCCCTCGAATAAACAATATAAGATTCTGGTTTCTCCCTCCCTCTTTATCACTTTTACTAATAAGAAGAATTGTAGAAAATGGGGCAGGAACAGGCTGAACAGTTTACCCTCCTCTTTCGGCTAATATTGCTCATAGAGGATCCTCTGTAGACCTAGCAATTTTCAGTTTACACCTAGCCGGGATCTCCTCAATTCTAGGCGCAGTAAATTTTATTTCCACAGTAATTAATATACGATCAACCGGAATCACATTTGACCGAATACCTTTATTTGTATGAGCGGTAGCCATCACAGCTCTTTTACTTCTACTGTCCCTCCCTGTTCTTGCAGGAGCCATCACTATACTTCTAACTGACCGAAATCTAAATACCTCTTTCTTTGACCCAGCAGGTGGTGGAGACCCAATTCTTTACCAACACTTATTC
>2767_Hemicrepidius_coreanus_Dongbaekpark_JJ
AACACTTTACTTTTTATTTGGAGCCTGATCAGGAATATTAGGTACTTCACTTAGACTTCTAATCCGTGCAGAACTTGGAAACCCCGGCTCACTAATTGGGAATGACCAAATTTATAATGTTATTGTTACAGCTCATGCCTTTATCATAATTTTCTTTATAGTAATACCAATTATAATTGGAGGATTCGGTAACTGATTAGTCCCCTTAATACTAGGAGCCCCTGATATAGCCTTCCCTCGAATAAACAATATAAGATTCTGGTTTCTCCCTCCCTCTTTATCACTTTTACTAATAAGAAGAATTGTAGAAAATGGGGCAGGAACAGGCTGAACAGTTTACCCTCCTCTTTCGGCTAATATTGCTCATAGAGGATCCTCTGTAGACCTAGCAATTTTCAGTTTACACCTAGCCGGGATCTCCTCAATTCTAGGCGCAGTAAATTTTATTTCCACAGTAATTAATATACGATCAACCGGAATCACATTTGACCGAATACCTTTATTTGTATGAGCGGTAGCCATCACAGCTCTTTTACTTCTACTGTCCCTCCCTGTTCTTGCAGGAGCCATCACTATACTTCTAACTGACCGAAATCTAAATACCTCTTTCTTTGACCCAGCAGGTGGTGGAGACCCAATTCTTTACCAACACTTATTC
>2768_Hemicrepidius_coreanus_Dongbaekpark_JJ
AACACTTTACTTTTTATTTGGAGCCTGATCAGGAATATTAGGTACTTCACTTAGACTTCTAATCCGTGCAGAACTTGGAAACCCCGGCTCACTAATTGGGAATGACCAAATTTATAATGTTATTGTTACAGCTCATGCCTTTATCATAATTTTCTTTATAGTAATACCAATTATAATTGGAGGATTCGGTAACTGATTAGTCCCCTTAATACTAGGAGCCCCTGATATAGCCTTCCCTCGAATAAACAATATAAGATTCTGGTTTCTCCCTCCCTCTTTATCACTTTTACTAATAAGAAGAATTGTAGAAAATGGGGCAGGAACAGGCTGAACAGTTTACCCTCCTCTTTCGGCTAATATTGCTCATAGAGGATCCTCTGTAGACCTAGCAATTTTCAGTTTACACCTAGCCGGGATCTCCTCAATTCTAGGCGCAGTAAATTTTATTTCCACAGTAATTAATATACGATCAACCGGAATCACATTTGACCGAATACCTTTATTTGTATGAGCGGTAGCCATCACAGCTCTTTTACTTCTACTGTCCCTCCCTGTTCTTGCAGGAGCCATCACTATACTTCTAACTGACCGAAATCTAAATACCTCTTTCTTTGACCCAGCAGGTGGTGGAGACCCAATTCTTTACCAACACTTATTC
>2769_Hemicrepidius_coreanus_Dongbaekpark_JJ
AACACTTTACTTTTTATTTGGAGCCTGATCAGGAATATTAGGTACTTCACTTAGACTTCTAATCCGTGCAGAACTTGGAAACCCCGGCTCACTAATTGGGAATGACCAAATTTATAATGTTATTGTTACAGCTCATGCCTTTATCATAATTTTCTTCATAGTAATACCAATTATAATTGGAGGATTCGGTAACTGATTAGTCCCCTTAATACTAGGAGCCCCTGATATAGCCTTCCCTCGAATAAACAATATAAGATTCTGGTTTCTCCCTCCCTCTTTATCACTTTTACTAATAAGAAGAATTGTAGAAAATGGGGCAGGAACAGGCTGAACAGTTTACCCTCCTCTTTCGGCTAATATTGCTCATAGAGGGTCCTCTGTAGACCTAGCAATTTTCAGTTTACACCTAGCCGGGATCTCCTCAATTCTAGGCGCAGTAAATTTTATTTCCACAGTAATTAATATACGATCAACCGGAATCACATTTGACCGAATACCTTTATTTGTATGAGCGGTAGCCATCACAGCTCTTTTACTTCTACTGTCCCTCCCTGTTCTTGCAGGAGCCATCACTATACTTCTAACTGACCGAAATCTAAATACCTCTTTCTTTGACCCAGCAGGTGGTGGAGACCCAATTCTTTACCAACACTTATTC
>2770_Hemicrepidius_coreanus_Dongbaekpark_JJ
AACACTTTACTTTTTATTTGGAGCCTGATCAGGAATATTAGGTACTTCACTTAGACTTCTAATCCGTGCAGAACTTGGAAACCCCGGCTCACTAATTGGGAATGACCAAATTTATAATGTTATTGTTACAGCTCATGCCTTTATCATAATTTTCTTTATAGTAATACCAATTATAATTGGAGGATTCGGTAACTGATTAGTCCCCTTAATACTAGGAGCCCCTGATATAGCCTTCCCTCGAATAAACAATATAAGATTCTGGTTTCTCCCTCCCTCTTTATCACTTTTACTAATAAGAAGAATTGTAGAAAATGGAGCAGGAACAGGCTGAACAGTTTACCCTCCTCTTTCGGCTAATATTGCTCATAGAGGATCCTCTGTAGACCTAGCAATTTTCAGTTTACACCTAGCCGGGATCTCCTCAATTCTAGGCGCAGTAAATTTTATTTCCACAGTAATTAATATACGATCAACCGGAATCACATTTGACCGAATACCTTTATTTGTATGAGCGGTAGCCATCACAGCTCTTTTACTTCTACTGTCCCTCCCTGTTCTTGCAGGAGCCATCACTATACTTCTAACTGACCGAAATCTAAATACCTCTTTCTTTGACCCAGCAGGTGGTGGAGACCCAATTCTTTACCAACACTTATTC
>2771_Hemicrepidius_coreanus_Dongbaekpark_JJ
AACACTTTACTTTTTATTTGGAGCCTGATCAGGAATATTAGGTACTTCACTTAGACTTCTAATCCGTGCAGAACTTGGAAACCCCGGCTCACTAATTGGGAATGACCAAATTTATAATGTTATTGTTACAGCTCATGCCTTTATCATAATTTTCTTTATAGTAATACCAATTATAATTGGAGGATTCGGTAACTGATTAGTCCCCTTAATACTAGGAGCCCCTGATATAGCCTTCCCTCGAATAAACAATATAAGATTCTGGTTTCTCCCTCCCTCTTTATCACTTTTACTAATAAGAAGAATTGTAGAAAATGGGGCAGGAACAGGCTGAACAGTTTACCCTCCTCTTTCGGCTAATATTGCTCATAGAGGATCCTCTGTAGACCTAGCAATTTTCAGTTTACACCTAGCCGGGATCTCCTCAATTCTAGGCGCAGTAAATTTTATTTCCACAGTAATTAATATACGATCAACCGGAATCACATTTGACCGAATACCTTTATTTGTATGAGCGGTAGCCATCACAGCTCTTTTACTTCTACTGTCCCTCCCTGTTCTTGCAGGAGCCATCACTATACTTCTAACTGACCGAAATCTAAATACCTCTTTCTTTGACCCAGCAGGTGGTGGAGACCCAATTCTTTACCAACACTTATTC
>2772_Hemicrepidius_coreanus_Dongbaekpark_JJ
AACACTTTACTTTTTATTTGGAGCCTGATCAGGAATATTAGGTACTTCACTTAGACTTCTAATCCGTGCAGAACTTGGAAACCCCGGCTCACTAATTGGGAATGACCAAATTTATAATGTTATTGTTACAGCTCATGCCTTTATCATAATTTTCTTCATAGTAATACCAATTATAATTGGAGGATTCGGTAACTGATTAGTCCCCTTAATACTAGGAGCCCCTGATATAGCCTTCCCTCGAATAAACAATATAAGATTCTGGTTTCTCCCTCCCTCTTTATCACTTTTACTAATAAGAAGAATTGTAGAAAATGGAGCAGGAACAGGCTGAACAGTTTACCCTCCTCTTTCGGCTAATATTGCTCATAGAGGGTCCTCTGTAGACCTAGCAATTTTCAGTTTACACCTAGCCGGGATCTCCTCAATTCTAGGCGCAGTAAATTTTATTTCCACAGTAATTAATATACGATCAACCGGAATCACATTTGACCGAATACCTTTATTTGTATGAGCGGTAGCCATCACAGCTCTTTTACTTCTACTGTCCCTCCCTGTTCTTGCAGGAGCCATCACTATACTTCTAACTGACCGAAATCTAAATACCTCTTTCTTTGACCCAGCAGGTGGTGGAGACCCAATTCTTTACCAACACTTATTC
>2773_Hemicrepidius_coreanus_Dongbaekpark_JJ
AACACTTTACTTTTTATTTGGAGCCTGATCAGGAATATTAGGTACTTCACTTAGACTTCTAATCCGTGCAGAACTTGGAAACCCCGGCTCACTAATTGGGAATGACCAAATTTATAATGTTATTGTTACAGCTCATGCCTTTATCATAATTTTCTTTATAGTAATACCAATTATAATTGGAGGATTCGGTAACTGGTTAGTCCCCTTAATACTAGGAGCCCCTGATATAGCCTTCCCTCGAATAAACAATATAAGATTCTGGTTTCTCCCTCCCTCTTTATCACTTTTACTAATAAGAAGAATTGTAGAAAATGGGGCAGGAACAGGCTGAACAGTTTACCCCCCTCTTTCGGCTAATATTGCTCATAGAGGGTCCTCTGTAGACCTAGCAATTTTCAGTTTACACCTAGCCGGGATCTCCTCAATTCTAGGCGCAGTAAATTTTATTTCCACAGTAATTAATATACGATCAACCGGAATCACATTTGACCGAATACCTTTATTTGTATGAGCGGTAGCCATCACAGCTCTTTTACTTCTACTGTCCCTCCCTGTTCTTGCAGGAGCCATCACTATACTTCTAACTGACCGAAATCTAAATACCTCTTTCTTTGACCCAGCAGGTGGTGGAGACCCAATTCTTTACCAACACTTATTC
>3429_Hemicrepidius_coreanus_JJ
AACACTTTACTTTTTATTTGGAGCCTGATCAGGAATATTAGGTACTTCACTTAGACTTCTAATCCGTGCAGAACTTGGAAACCCCGGCTCACTAATTGGGAATGACCAAATTTATAATGTTATTGTTACAGCTCATGCCTTTATCATAATTTTCTTTATAGTAATACCAATTATAATTGGAGGATTCGGTAACTGATTAGTCCCCTTAATACTAGGAGCCCCTGATATAGCCTTCCCTCGAATAAACAATATAAGATTCTGGTTTCTCCCTCCCTCTTTATCACTTTTACTAATAAGAAGAATTGTAGAAAATGGGGCAGGAACAGGCTGAACAGTTTACCCTCCTCTTTCGGCTAATATTGCTCATAGAGGATCCTCTGTAGACCTAGCAATTTTCAGTTTACACCTAGCCGGGATCTCCTCAATTCTAGGCGCAGTAAATTTTATTTCCACAGTAATTAATATACGATCAACCGGAATCACATTTGACCGAATACCTTTATTTGTATGAGCGGTAGCCATCACAGCTCTTTTACTTCTACTGTCCCTCCCTGTTCTTGCAGGAGCCATCACTATACTTCTAACTGACCGAAACCTAAATACCTCTTTCTTTGACCCAGCAGGTGGTGGAGACCCAATTCTTTACCAACACTTATTC
>3430_Hemicrepidius_coreanus_JJ
AACACTTTACTTTTTATTTGGAGCCTGATCAGGAATATTAGGTACTTCACTTAGACTTCTAATCCGTGCAGAACTTGGAAACCCCGGCTCACTAATTGGGAATGACCAAATTTATAATGTTATTGTTACAGCTCATGCCTTTATCATAATTTTCTTTATAGTAATACCAATTATAATTGGAGGATTCGGTAACTGATTAGTCCCCTTAATACTAGGAGCCCCTGATATAGCCTTCCCTCGAATAAACAATATAAGATTCTGGTTTCTCCCTCCCTCTTTATCACTTTTACTAATAAGAAGAATTGTAGAAAATGGGGCAGGAACAGGCTGAACAGTTTACCCTCCTCTTTCGGCTAATATTGCTCATAGAGGATCCTCTGTAGACCTAGCAATTTTCAGTTTACACCTAGCCGGGATCTCCTCAATTCTAGGCGCAGTAAATTTTATTTCCACAGTAATTAATATACGATCAACCGGAATCACATTTGACCGAATACCTTTATTTGTATGAGCGGTAGCCATCACAGCTCTTTTACTTCTACTGTCCCTCCCTGTTCTTGCAGGAGCCATCACTATACTTCTAACTGACCGAAATCTAAATACCTCTTTCTTTGACCCAGCAGGTGGTGGAGACCCAATTCTTTACCAACACTTATTC
>173_Hemicrepidius_coreanus_Is_Chuja_JJ
AACACTTTACTTTTTATTTGGAGCCTGATCAGGAATATTAGGTACTTCACTTAGACTTCTAATCCGTGCAGAACTTGGAAACCCCGGCTCACTAATTGGGAATGACCAAATTTATAATGTTATTGTTACAGCTCAGGCCTTTATCATAATTTTCTTTATAGTAATACCAATTATAATTGGGGGATTTGGTAACTGATTAGTCCCCTTAATACTAGGAGCCCCTGATATAGCCTTCCCTCGAATAAACAATATAAGATTCTGGTTTCTCCCCCCCTCTTTATCACTTTTACTAATAAGAAGAATTGTAGAAAATGGGGCAGGAACAGGCTGAACAGTTTACCCTCCTCTTTCGGCTAATATTGCTCATAGAGGGTCCTCTGTAGACCTAGCAATTTTTAGTTTACACCTAGCTGGGATCTCCTCAATTCTAGGCGCAGTAAATTTTATTTCCACAGTAATTAATATACGATCAACCGGAATCACATTTGACCGAATACCTTTATTTGTATGAGCAGTAGCCATCACAGCTCTTTTGCTTCTACTGTCCCTCCCTGTTCTTGCAGGAGCTATCACTATACTTCTAACTGACCGAAACCTAAATACCTCTTTCTTTGACCCAGCAGGTGGTGGGGACCCAATTCTTTATCAACACTTATTC
>174_Hemicrepidius_coreanus_Is_Chuja_JJ
AACACTTTACTTTTTATTTGGAGCCTGATCAGGAATATTAGGTACTTCACTTAGACTTCTAATCCGTGCAGAACTTGGAAACCCCGGCTCACTAATTGGGAATGACCAAATTTATAATGTTATTGTTACAGCTCATGCCTTTATCATAATTTTCTTTATAGTAATACCAATTATAATTGGGGGATTTGGTAACTGATTAGTCCCCTTAATACTAGGAGCCCCTGATATAGCCTTCCCTCGAATAAACAATATAAGATTCTGGTTTCTCCCCCCCTCTTTATCACTTTTACTAATAAGAAGAATTGTAGAAAATGGTGCAGGAACAGGCTGAACAGTTTACCCTCCTCTTTCGGCTAATATTGCTCATAGAGGGTCCTCTGTAGACCTAGCAATTTTTAGTTTACACCTAGCTGGGATCTCCTCAATTCTAGGCGCAGTAAATTTTATTTCCACAGTAATTAATATACGATCAACCGGAATCACATTTGACCGAATACCTTTATTTGTATGAGCAGTAGCCATCACAGCTCTTTTGCTTCTACTGTCCCTCCCTGTTCTTGCAGGAGCTATCACTATACTTCTAACTGACCGAAACCTAAATACCTCTTTCTTTGACCCAGCAGGTGGTGGGGACCCAATTCTTTATCAACACTTATTC
>175_Hemicrepidius_coreanus_Is_Chuja_JJ
AACACTTTACTTTTTATTTGGAGCCTGATCAGGAATATTAGGTACTTCACTTAGACTTCTAATCCGTGCAGAACTTGGAAACCCCGGCTCACTAATTGGGAATGACCAAATTTATAATGTTATTGTTACAGCTCATGCCTTTATCATAATTTTCTTTATAGTAATACCAATTATAATTGGGGGATTTGGTAACTGATTAGTCCCCTTAATACTAGGAGCCCCTGATATAGCCTTCCCTCGAATAAACAATATAAGATTCTGGTTTCTCCCCCCCTCTTTATCACTTTTACTAATAAGAAGAATTGTAGAAAATGGTGCAGGAACAGGCTGAACAGTTTACCCTCCTCTTTCGGCTAATATTGCTCATAGAGGGTCCTCTGTAGACCTAGCAATTTTTAGTTTACACCTAGCTGGGATCTCCTCAATTCTAGGCGCAGTAAATTTTATTTCCACAGTAATTAATATACGATCAACCGGAATCACATTTGACCGAATACCTTTATTTGTATGAGCAGTAGCCATCACAGCTCTTTTGCTTCTACTGTCCCTCCCTGTTCTTGCAGGAGCTATCACTATACTTCTAACTGACCGAAACCTAAATACCTCTTTCTTTGACCCAGCAGGTGGTGGGGACCCAATTCTTTATCAACACTTATTC
>3310_Hemicrepidius_sp_1_Youngpyeong_GW
AACACTTTACTTTTTATTTGGAGCCTGATCAGGAATATTAGGTACTTCACTTAGACTTCTAATCCGTGCAGAACTTGGAAACCCCGGCTCACTAATTGGGAATGACCAAATTTATAATGTTATTGTCACAGCTCATGCCTTTATCATAATTTTCTTTATAGTAATACCAATTATAATTGGGGGATTTGGTAACTGGTTAGTTCCCTTAATACTAGGAGCCCCTGATATAGCCTTCCCTCGAATAAACAATATAAGATTCTGGTTTCTTCCCCCCTCTTTATCACTTTTACTAATAAGAAGAATTGTAGAAAATGGCGCAGGAACAGGTTGAACAGTTTACCCTCCTCTTTCGGCTAATATTGCCCATAGAGGATCCTCTGTAGACCTAGCAATTTTCAGTTTACACCTAGCTGGGATCTCTTCAATTCTAGGTGCAGTAAATTTTATTTCCACAGTAATTAATATGCGATCAACCGGAATCACATTTGACCGGATACCTTTATTTGTATGAGCAGTAGCCATCACAGCTCTTTTGCTTCTGCTGTCTCTCCCTGTCCTTGCAGGAGCTATCACTATACTTCTAACTGACCGAAATCTAAATACCTCTTTCTTTGACCCAGCAGGTGGTGGAGACCCAATTCTTTACCAACATTTATTC
>1050_Hemicrepidius_hallaensis_stat_nov_Yeongsil_JJ
AACACTTTACTTTTTATTTGGAGCCtGATCAGGAATATTGGGCACTTCACTTAGACTTCTAATTCGTGCAGAACTTGGAAACCCCGGCTCACTGATTGGGAATGACCAAATTTATAACGTTATTGTTACAGCTCATGCCTTTATTATGATTTTCTTTATAGTAATACCAATTATAATTGGAGGATTCGGTAACTGATTAGTTCCCCTAATACTAGGAGCCCCTGATATAGCCTTCCCCCGAATAAACAATATAAGATTCTGATTTCTTCCTCCCTCTTTATCACTTTTACTAATAAGAAGAATTGTAGAAAATGGTGCAGGAACAGGTTGAACAGTTTACCCGCCTCTTTCAGCTAATATTGCCCACAGAGGATCCTCTGTAGACCTAGCAATTTTCAGTTTACACCTAGCTGGGATCTCTTCAATTCTAGGTGCAGTAAATTTTATTTCCACAGTAATTAATATACGATCAACCGGAATCACATTTGACCGAATACCTTTATTTGTATGAGCAGTAGCCATTACAGCCCTTTTGCTGCTACTATCTCTCCCTGTACTTGCAGGAGCTATCACTATACTTCTAACTGACCGAAATCTAAATACCTCTTTCTTTGACCCAGCAGGCGGTGGAGACCCAATCCTTTATCAACATTTATTC
>1051_Hemicrepidius_hallaensis_stat_nov_Yeongsil_JJ
AACACTTTACTTTTTATTTGGAGCCTGATCAGGAATATTGGGCACTTCACTTAGACTTCTAATTCGTGCAGAACTTGGAAACCCCGGCTCACTGATTGGGAATGACCAAATTTATAATGTTATTGTTACAGCTCATGCCTTTATTATGATTTTCTTTATAGTGATACCAATTATAATTGGAGGATTCGGTAACTGATTAGTTCCCCTAATACTAGGAGCCCCTGATATAGCCTTCCCCCGAATAAACAATATAAGATTCTGATTTCTTCCTCCCTCTTTATCACTTTTACTAATAAGAAGAATTGTAGAAAATGGTGCAGGAACAGGTTGAACAGTTTACCCACCTCTTTCAGCTAATATTGCCCACAGAGGATCCTCTGTAGACCTAGCAATTTTCAGTTTACACCTAGCTGGGATCTCTTCAATTCTAGGTGCAGTAAATTTTATTTCCACAGTAATTAATATACGATCAACCGGAATCACATTTGACCGAATACCTTTATTTGTATGAGCAGTAGCCATTACAGCCCTTTTGCTGCTTCTATCTCTCCCTGTCCTTGCAGGAGCTATCACTATACTTCTAACTGACCGAAATCTAAATACCTCTTTCTTTGACCCAGCAGGTGGTGGAGACCCAATCCTTTATCAACATTTATTC
>1052_Hemicrepidius_hallaensis_stat_nov_Yeongsil_JJ
AACACTTTACTTTTTATTTGGAGCCTGATCAGGAATATTGGGCACTTCACTTAGACTTCTAATTCGTGCAGAACTTGGAAACCCCGGCTCACTGATTGGGAATGACCAAATTTATAATGTTATTGTTACAGCTCATGCCTTTATTATGATTTTCTTTATAGTGATACCAATTATAATTGGAGGATTCGGTAACTGATTAGTTCCCCTAATACTAGGAGCCCCTGATATAGCCTTCCCCCGAATAAACAATATAAGATTCTGATTTCTTCCTCCCTCTTTATCACTTTTACTAATAAGAAGAATTGTAGAAAATGGTGCAGGAACAGGTTGAACAGTTTACCCACCTCTTTCAGCTAATATTGCCCACAGAGGATCCTCTGTAGACCTAGCAATTTTCAGTTTACACCTAGCTGGGATCTCTTCAATTCTAGGTGCAGTAAATTTTATTTCCACAGTAATTAATATACGATCAACCGGAATCACATTTGACCGAATACCTTTATTTGTATGAGCAGTAGCCATTACAGCCCTTTTGCTGCTTCTATCTCTCCCTGTCCTTGCAGGAGCTATCACTATACTTCTAACTGACCGAAATCTAAATACCTCTTTCTTTGACCCAGCAGGTGGTGGAGACCCAATCCTTTATCAACATTTATTC
>1053_Hemicrepidius_hallaensis_stat_nov_Yeongsil_JJ
AACACTTTACTTTTTATTTGGAGCCTGATCAGGAATATTGGGCACTTCACTTAGACTTCTAATTCGTGCAGAACTTGGAAACCCCGGCTCACTGATTGGGAATGACCAAATTTATAATGTTATTGTTACAGCTCATGCCTTTATTATGATTTTCTTTATAGTAATACCAATTATAATTGGAGGATTCGGTAACTGGTTAGTTCCCCTAATACTAGGAGCCCCTGATATAGCCTTCCCCCGAATAAACAATATAAGATTCTGATTTCTTCCTCCCTCTTTATCACTTTTACTAATAAGAAGAATTGTAGAAAATGGTGCAGGAACAGGTTGAACAGTTTACCCGCCTCTTTCAGCTAATATTGCCCACAGAGGATCCTCTGTAGACCTAGCAATTTTCAGTTTACACCTAGCTGGGATCTCTTCAATTCTAGGTGCAGTAAATTTTATTTCCACAGTAATTAATATACGATCAACCGGAATCACATTTGACCGAATACCTTTATTTGTATGAGCAGTAGCCATTACAGCCCTTTTGCTGCTATTATCTCTCCCTGTACTTGCAGGAGCTATCACTATACTTCTAACTGACCGAAATCTAAATACCTCTTTCTTTGACCCAGCAGGCGGTGGAGACCCAATCCTTTATCAACATTTATTC
>1054_Hemicrepidius_hallaensis_stat_nov_Yeongsil_JJ
AACACTTTACTTTTTATTTGGAGCCTGATCAGGAaTATTGGGCACTTCACTTAGACTTCTAATTCGTGCAGAACTTGGAAACCCCGGCTCACTGATTGGGAATGACCAAATTTATAATGTTATTGTTACAGCTCATGCCTTTATTATGATTTTCTTTATAGTAATACCAATTATAATTGGAGGATTCGGTAACTGATTAGTTCCCCTAATACTAGGAGCCCCTGATATAGCCTTCCCCCGAATAAACAATATAAGATTCTGATTTCTTCCTCCCTCTTTATCACTTTTACTAATAAGAAGAATTGTAGAAAATGGTGCAGGAACAGGTTGAACAGTTTACCCGCCTCTTTCAGCTAATATTGCCCACAGAGGATCCTCTGTAGACCTAGCAATTTTCAGTTTACACCTAGCTGGGATCTCTTCAATTCTAGGTGCAGTAAATTTTATTTCCACAGTAATTAATATACGATCAACCGGAATCACATTTGACCGAATACCTTTATTTGTATGAGCAGTAGCCATTACAGCCCTTTTGCTGCTACTATCTCTCCCTGTACTTGCAGGAGCTATCACTATACTTCTAACTGACCGAAATCTAAATACCTCTTTCTTTGACCCAGCAGGCGGTGGAGACCCAATCCTTTATCAACATTTATTC
>1055_Hemicrepidius_hallaensis_stat_nov_Yeongsil_JJ
AACACTTTACTTTTTATTTGGAGCCTGATCAGGAATATTGGGCACTTCACTTAGACTTCTAATTCGTGCAGAACTTGGAAACCCCGGCTCACTGATTGGGAATGACCAAATTTATAATGTTATTGTTACAGCTCATGCCTTTATTATGATTTTCTTTATAGTAATACCAATTATAATTGGAGGATTCGGTAACTGATTAGTTCCCCTAATACTAGGAGCCCCTGATATAGCCTTCCCCCGAATAAACAATATAAGATTCTGATTTCTTCCTCCCTCTTTATCACTTTTACTAATAAGAAGAATTGTAGAAAATGGTGCAGGAACAGGTTGAACAGTTTACCCGCCTCTTTCAGCTAATATTGCCCACAGAGGATCCTCTGTAGACCTAGCAATTTTCAGTTTACACCTAGCTGGGATCTCTTCAATTCTAGGTGCAGTAAATTTTATTTCCACAGTAATTAATATACGATCAACCGGAATCACATTTGACCGAATACCTTTATTTGTATGAGCAGTAGCCATTACAGCCCTTTTGCTGCTACTATCTCTCCCTGTACTTGCAGGAGCTATCACTATACTTCTAACTGACCGAAATCTAAATACCTCTTTCTTTGACCCAGCAGGCGGTGGAGACCCAATCCTTTATCAACATTTATTC
>1057_Hemicrepidius_hallaensis_stat_nov_Yeongsil_JJ
AACACTTTACTTTTTATTTGGAGCCTGATCAGGAATATTGGGCACTTCACTTAGACTTCTAATTCGTGCAGAACTTGGAAACCCCGGCTCACTGATTGGGAATGACCAAATTTATAATGTTATTGTTACAGCTCATGCCTTTATTATGATTTTCTTTATAGTAATACCAATTATAATTGGAGGATTCGGTAACTGATTAGTTCCCCTAATACTAGGAGCCCCTGATATAGCCTTCCCCCGAATAAACAATATAAGATTCTGATTTCTTCCTCCCTCTTTATCACTTTTACTAATAAGAAGAATTGTAGAAAATGGTGCAGGAACAGGTTGAACAGTTTACCCGCCTCTTTCAGCTAATATTGCCCACAGAGGATCCTCTGTAGACCTAGCAATTTTCAGTTTACACCTAGCTGGGATCTCTTCAATTCTAGGTGCAGTAAATTTTATTTCCACAGTAATTAATATACGATCAACCGGAATCACATTTGACCGAATACCTTTATTTGTATGAGCAGTAGCCATTACAGCCCTTTTGCTGCTACTATCTCTCCCTGTACTTGCAGGAGCTATCACTATACTTCTAACTGACCGAAATCTAAATACCTCTTTCTTTGACCCAGCAGGCGGTGGAGACCCAATCCTTTATCAACATTTATTC
>1102_Hemicrepidius_hallaensis_stat_nov_Seongpanak_JJ
AACACTTTACTTTTTATTTGGAGCCTGATCAGGAATATTGGGCACTTCACTTAGACTTCTAATTCGTGCAGAACTTGGAAACCCCGGCTCACTGATTGGGAATGACCAAATTTATAATGTTATTGTTACAGCTCATGCCTTTATTATGATTTTCTTTATAGTAATACCAATTATAATTGGAGGATTCGGTAACTGATTAGTTCCCCTAATACTAGGAGCCCCTGATATAGCCTTCCCCCGAATAAACAATATAAGATTCTGATTTCTTCCTCCCTCTTTATCACTTTTACTAATAAGAAGAATTGTAGAAAATGGTGCAGGAACAGGTTGAACAGTTTACCCGCCTCTTTCAGCTAATATTGCCCACAGAGGATCCTCTGTAGACCTAGCAATTTTCAGTTTACACCTAGCTGGGATCTCTTCAATTCTAGGTGCAGTAAATTTTATTTCCACAGTAATTAATATACGATCAACCGGAATCACATTTGACCGGATACCTTTATTTGTATGAGCAGTAGCCATTACAGCCCTTTTGCTGCTACTATCTCTCCCTGTCCTTGCAGGAGCTATCACTATACTTCTAACTGACCGAAATCTAAATACCTCTTTCTTTGACCCAGCAGGTGGTGGAGACCCAATCCTTTATCAACATTTATTC
>1103_Hemicrepidius_hallaensis_stat_nov_Seongpanak_JJ
AACACTTTACTTTTTATTTGGAGCCTGATCAGGAaTATTGGGCACTTCACTTAGACTCCTAATTCGTGCAGAACTTGGAAACCCCGGCTCACTGATTGGGAATGACCAAATTTATAATGTTATTGTTACAGCTCATGCCTTTATTATGATTTTCTTTATAGTAATACCAATTATAATTGGAGGATTCGGTAACTGATTAGTTCCCCTAATACTAGGAGCCCCTGATATAGCCTTCCCCCGAATAAACAATATAAGATTCTGATTTCTTCCTCCCTCTTTATCACTTTTACTAATAAGAAGAATTGTAGAAAATGGTGCAGGAACAGGTTGAACAGTTTACCCGCCTCTTTCAGCTAATATTGCCCACAGAGGATCCTCTGTAGACCTAGCAATTTTCAGTTTACACCTAGCTGGGATCTCTTCAATTCTAGGTGCAGTAAATTTTATTTCCACAGTAATTAATATACGATCAACCGGAATCACATTTGACCGGATACCTTTATTTGTATGAGCAGTAGCCATTACAGCCCTTTTGCTGCTACTATCTCTCCCTGTCCTTGCAGGAGCTATCACTATACTTCTAACTGACCGAAATCTAAATACCTCTTTCTTTGACCCAGCAGGTGGTGGAGACCCAATCCTTTATCAACATTTATTC
>1104_Hemicrepidius_hallaensis_stat_nov_Seongpanak_JJ
AACACTTTACTTTTTATTTGGAGCCTGATCAGGAATATTGGGCACTTCACTTAGACTTCTAATTCGTGCGGAACTTGGAAACCCCGGCTCACTGATTGGGAATGACCAAATTTATAATGTTATTGTTACAGCTCATGCCTTTATTATGATTTTCTTTATAGTGATACCAATTATAATTGGGGGATTCGGGAACTGATTAGTTCCCCTAATACTAGGAGCCCCTGATATAGCCTTCCCCCGAATAAACAATATAAGATTCTGATTTCTTCCTCCCTCTTTATCACTTTTACTAATAAGAAGAATTGTAGAAAATGGTGCAGGAACAGGTTGAACAGTTTACCCACCTCTTTCAGCTAATATTGCCCACAGAGGATCCTCTGTAGACCTAGCAATTTTCAGTTTACACCTAGCTGGGATCTCTTCAATTCTAGGTGCAGTAAATTTTATTTCCACAGTAATTAATATACGATCAACCGGAATCACATTTGACCGGATGCCTTTATTTGTATGAGCAGTAGCCATTACAGCCCTTTTGCTGCTACTATCTCTCCCTGTCCTTGCAGGAGCTATCACTATACTTCTAACTGACCGAAATCTAAATACCTCTTTCTTTGACCCAGCAGGTGGTGGAGACCCAATCCTTTATCAACATTTATTC
>1037_Hemicrepidius_sp_2_Mt_Gyebang_GW
AACACTTTACTTTTTATTTGGAGCCTGATCAGGAATATTGGGTACTTCACTTAGACTTCTAATCCGTGCAGAACTTGGAAACCCCGGCTCACTAATTGGAAATGACCAAATTTATAATGTTATTGTTACAGCTCATGCCTTTATTATAATTTTCTTTATAGTAATACCAATTATAATTGGGGGATTCGGTAACTGATTAGTCCCCTTAATACTAGGAGCTCCTGATATAGCCTTCCCCCGAATAAACAATATAAGATTCTGATTTCTTCCCCCCTCTTTATCACTTTTACTAATAAGAAGAATTGTAGAAAATGGCGCAGGAACAGGTTGAACAGTTTACCCTCCTCTGTCAGCTAATATTGCCCATAGAGGATCCTCTGTAGACCTGGCAATTTTCAGTTTACACCTAGCTGGAATCTCTTCAATTCTAGGTGCAGTAAATTTTATTTCCACAGTAATTAATATACGGTCAACCGGAATCACATTTGACCGAATACCCTTATTTGTATGAGCAGTAGCCATTACAGCTCTTTTGCTCCTTCTATCTCTCCCCGTCCTTGCAGGAGCTATCACTATACTTTTAACTGACCGAAATCTAAATACCTCTTTCTTTGACCCAGCAGGCGGTGGAGACCCAATCCTTTATCAACATTTATTC
>1038_Hemicrepidius_sp_2_Mt_Gyebang_GW
AACACTTTACTTTTTATTTGGAGCCTGATCAGGAATATTGGGTACTTCACTTAGACTTCTAATCCGTGCAGAACTTGGAAACCCCGGCTCACTAATTGGAAATGACCAAATTTATAATGTTATTGTTACAGCTCATGCCTTTATTATAATTTTCTTTATAGTAATACCAATTATAATTGGGGGATTCGGTAACTGATTAGTCCCCTTAATACTAGGAGCTCCTGATATAGCCTTCCCCCGAATAAACAATATAAGATTCTGATTTCTTCCCCCCTCTTTATCACTTTTACTAATAAGAAGAATTGTAGAAAATGGCGCAGGAACAGGTTGAACAGTTTACCCTCCTCTGTCAGCTAATATTGCCCATAGAGGATCCTCTGTAGACCTGGCAATTTTCAGTTTACACCTAGCTGGAATCTCTTCAATTCTAGGTGCAGTAAATTTTATTTCCACAGTAATTAATATACGGTCAACCGGAATCACATTTGACCGAATACCCTTATTTGTATGAGCAGTAGCCATTACAGCTCTTTTGCTCCTTCTATCTCTCCCCGTCCTTGCAGGAGCTATCACTATACTTTTAACTGACCGAAATCTAAATACCTCTTTCTTTGACCCAGCAGGCGGTGGAGACCCAATCCTTTATCAACATTTATTC
>1039_Hemicrepidius_sp_2_Mt_Gyebang_GW
AACACTTTACTTTTTATTTGGAGCCTGATCAGGAATATTGGGTACTTCACTTAGACTTCTAATCCGTGCAGAACTTGGAAACCCCGGCTCACTAATTGGAAATGACCAAATTTATAATGTTATTGTTACAGCTCATGCCTTTATTATAATTTTCTTTATAGTAATACCAATTATAATTGGGGGATTCGGTAACTGATTAGTCCCCTTAATACTAGGAGCTCCTGATATAGCCTTCCCCCGAATAAACAATATAAGATTCTGATTTCTTCCCCCCTCTTTATCACTTTTACTAATAAGAAGAATTGTAGAAAATGGCGCAGGAACAGGTTGAACAGTTTACCCTCCTCTGTCAGCTAATATTGCCCATAGAGGATCCTCTGTAGACCTGGCAATTTTCAGTTTACACCTAGCTGGAATCTCTTCAATTCTAGGTGCAGTAAATTTTATTTCCACAGTAATTAATATACGGTCAACCGGAATCACATTTGACCGAATACCCTTATTTGTATGAGCAGTAGCCATTACAGCTCTTTTGCTCCTTCTATCTCTCCCCGTCCTTGCAGGAGCTATCACTATACTTTTAACTGACCGAAATCTAAATACCTCTTTCTTTGACCCAGCAGGCGGTGGAGACCCAATCCTTTATCAACATTTATTC
>2828_Hemicredpdius_sp_2_Mt_Seolak_Sockcho_GW
AACACTTTACTTTTTATTTGGAGCCTGATCAGGAATATTGGGTACTTCACTTAGACTTCTAATCCGTGCAGAACTTGGGAACCCCGGCTCACTAATTGGAAATGACCAAATTTATAATGTTATTGTTACAGCTCATGCCTTTATTATAATTTTCTTTATAGTAATACCGATTATAATTGGGGGATTCGGTAACTGATTAGTCCCCTTAATACTAGGAGCTCCCGATATAGCCTTCCCCCGAATAAACAATATAAGATTCTGGTTTCTTCCTCCCTCTTTATCACTTTTACTAATAAGAAGAATTGTAGAAAATGGTGCAGGAACAGGCTGAACAGTTTACCCCCCTCTGTCAGCTAATATTGCCCATAGAGGATCCTCTGTAGACCTAGCAATTTTCAGTTTACACCTAGCTGGAATCTCTTCAATTCTAGGTGCAGTAAATTTCATTTCCACAGTAATTAATATACGATCAACCGGAATCACATTTGACCGAATACCTTTATTTGTATGAGCAGTAGCCATTACAGCTCTTTTGCTTCTTCTATCTCTCCCTGTCCTTGCAGGAGCTATCACTATACTTTTAACTGACCGAAATCTAAATACCTCTTTCTTTGACCCAGCAGGTGGTGGAGACCCAATCCTTTATCAACATTTATTC
>2825_Hemicrepidius_sp_2_Mt_seolak_Sockcho_GW
AACACTTTACTTTTTATTTGGAGCCTGATCAGGAATATTGGGTACTTCACTTAGACTTCTAATCCGTGCAGAACTTGGAAACCCCGGCTCACTAATTGGAAATGACCAAATTTATAATGTTATTGTTACAGCTCATGCCTTTATTATAATTTTCTTTATAGTAATACCGATTATAATTGGGGGATTCGGTAACTGGTTAGTCCCCTTAATACTAGGAGCTCCTGATATAGCCTTCCCTCGAATAAACAATATAAGATTCTGATTTCTTCCTCCCTCTTTATCACTTTTACTAATAAGAAGAATTGTAGAAAATGGTGCAGGAACAGGTTGAACAGTTTACCCCCCTCTGTCAGCTAATATTGCCCATAGAGGATCCTCTGTAGACCTAGCAATTTTCAGTTTACACCTAGCTGGAATCTCTTCAATTCTAGGTGCAGTAAATTTTATTTCCACAGTAATTAATATACGATCAACCGGAATCACATTTGACCGAATACCTTTATTTGTATGAGCAGTAGCCATTACAGCTCTTCTGCTTCTTCTATCTCTCCCTGTCCTTGCAGGAGCTATCACTATACTTTTAACTGACCGAAATCTAAATACCTCTTTCTTTGACCCAGCAGGTGGTGGAGACCCAATCCTTTATCAACATTTATTC
>2826_Hemicrepidius_sp_2_Mt_Seolak_Sockcho_GW
AACACTTTACTTTTTATTTGGAGCCTGATCAGGAATATTGGGTACTTCACTTAGACTTCTAATCCGTGCAGAACTTGGAAACCCCGGCTCACTAATTGGAAATGACCAAATTTATAATGTTATTGTTACAGCTCATGCCTTTATTATAATTTTCTTTATAGTAATACCGATTATAATTGGGGGATTCGGTAACTGGTTAGTCCCCTTAATACTAGGAGCTCCTGATATAGCCTTCCCTCGAATAAACAATATAAGATTCTGATTTCTTCCTCCCTCTTTATCACTTTTACTAATAAGAAGAATTGTAGAAAATGGTGCAGGAACAGGTTGAACAGTTTACCCCCCTCTGTCAGCTAATATTGCCCATAGAGGATCCTCTGTAGACCTAGCAATTTTCAGTTTACACCTAGCTGGAATCTCTTCAATTCTAGGTGCAGTAAATTTTATTTCCACAGTAATTAATATACGATCAACCGGAATCACATTTGACCGAATACCTTTATTTGTATGAGCAGTAGCCATTACAGCTCTTCTGCTTCTTCTATCTCTCCCTGTCCTTGCAGGAGCTATCACTATACTTTTAACTGACCGAAATCTAAATACCTCTTTCTTTGACCCAGCAGGTGGTGGAGACCCAATCCTTTATCAACATTTATTC
>2827_Hemicrepidius_sp_2_Mt_Seolak_Sockcho_GW
AACACTTTACTTTTTATTTGGAGCCTGATCAGGAATATTGGGTACTTCACTTAGACTTCTAATCCGTGCAGAACTTGGAAACCCCGGCTCACTAATTGGAAATGACCAAATTTATAATGTTATTGTTACAGCTCATGCCTTTATTATAATTTTCTTTATAGTAATACCGATTATAATTGGGGGATTCGGTAACTGGTTAGTCCCCTTAATACTAGGAGCTCCTGATATAGCCTTCCCTCGAATAAACAATATAAGATTCTGATTTCTTCCTCCCTCTTTATCACTTTTACTAATAAGAAGAATTGTAGAAAATGGTGCAGGAACAGGTTGAACAGTTTACCCCCCTCTGTCAGCTAATATTGCCCATAGAGGATCCTCTGTAGACCTAGCAATTTTCAGTTTACACCTAGCTGGAATCTCTTCAATTCTAGGTGCAGTAAATTTTATTTCCACAGTAATTAATATACGATCAACCGGAATCACATTTGACCGAATACCTTTATTTGTATGAGCAGTAGCCATTACAGCTCTTCTGCTTCTTCTATCTCTCCCTGTCCTTGCAGGAGCTATCACTATACTTTTAACTGACCGAAATCTAAATACCTCTTTCTTTGACCCAGCAGGTGGTGGAGACCCAATCCTTTATCAACATTTATTC
>2397_Hemicrepidius_oblongus_Primorsky_Russia
AACACTTTACTTTTTATTTGGAGCCTGATCAGGAATATTAGGTACTTCACTTAGACTCCTAATCCGCGCAGAGCTTGGAAACCCTGGCTCACTAATTGGGAATGACCAAATTTATAATGTTATTGTTACAGCTCATGCCTTTATCATAATTTTCTTTATAGTAATACCAATTATAATTGGGGGATTTGGTAACTGATTAGTTCCCTTAATGCTAGGAGCCCCTGATATAGCCTTCCCTCGAATAAACAATATAAGATTCTGGTTTCTTCCCCCCTCTTTATCACTTTTACTAATAAGAAGAATCGTTGAAAACGGGGCAGGAACAGGTTGAACAGTTTACCCTCCTCTTTCGGCTAATATTGCCCATAGAGGGTCCTCTGTAGACCTAGCAATTTTCAGTTTACACCTAGCTGGGATCTCTTCAATTCTAGGCGCAGTAAATTTTATTTCCACAGTAATTAATATACGATCAACCGGAATCACATTTGACCGAATACCCCTATTTGTATGAGCAGTGGCCATCACGGCTCTTTTACTTCTGCTGTCTCTCCCTGTCCTTGCAGGAGCTATCACTATACTTCTAACTGACCGAAATCTAAATACCTCTTTCTTTGACCCAGCAGGCGGTGGAGACCCAATTCTTTACCAACATTTATTC
>955_Hemicrepidius_oblongus_Anyang_GG
AACACTCTACTTTTTATTTGGAGCCTGATCAGGAATATTAGGTACTTCACTTAGACTTCTAATCCGTGCAGAACTTGGAAACCCCGGCTCACTAATTGGGAATGACCAAATTTATAATGTTATTGTTACAGCTCATGCCTTTATCATAATTTTCTTTATAGTAATACCAATTATAATTGGGGGATTTGGTAACTGATTAGTCCCCTTAATACTAGGGGCCCCTGATATGGCCTTCCCTCGAATAAACAATATAAGATTCTGATTTCTTCCCCCCTCTTTATCACTTTTACTAATAAGAAGAATTGTAGAAAATGGGGCAGGAACAGGTTGAACAGTTTACCCACCTCTTTCAGCTAATATTGCCCATAGAGGATCCTCTGTAGACCTAGCAATTTTCAGTTTACACCTAGCTGGAATCTCTTCAATTCTAGGTGCAGTAAATTTTATTTCCACAGTTATTAATATACGATCAACTGGGATCACATTTGACCGAATACCTTTATTTGTATGAGCAGTAGCCATTACAGCTCTTTTACTTCTACTATCTCTCCCTGTCCTTGCAGGAGCTATCACTATACTTCTAACTGACCGAAATCTAAATACCTCTTTCTTTGACCCAGCAGGTGGTGGAGATCCAATTCTTTACCAACATTTATTC
>963_Hemicrepidius_oblongus_Anyang_GG
----------TTTTTATTTGGAGCCTGATCAGGAATATTAGGTACTTCACTTAGACTTCTAATCCGTGCAGAACTTGGAAACCCCGGCTCACTAATTGGGAATGACCAAATTTATAATGTTATTGTTACAGCTCATGCCTTTATCATAATTTTCTTTATAGTAATACCAATTATAATTGGGGGATTTGGTAACTGATTAGTCCCCTTAATACTAGGGGCCCCTGATATGGCCTTCCCTCGAATAAACAATATAAGATTCTGATTTCTTCCCCCCTCTTTATCACTTTTACTAATAAGAAGAATTGTAGAAAATGGGGCAGGAACAGGTTGAACAGTTTACCCACCTCTTTCAGCTAATATTGCCCATAGAGGATCCTCTGTAGACCTAGCAATTTTCAGTTTACACCTAGCTGGAATCTCTTCAATTCTAGGTGCAGTAAATTTTATTTCCACAGTTATTAATATACGATCAACTGGGATCACATTTGACCGAATACCTTTATTTGTATGAGCAGTAGCCATTACAGCTCTTTTACTTCTACTATCTCTCCCTGTCCTTGCAGGAGCTATCACTATACTTCTAACTGACCGAAATCTAAATACCTCTTTCTTTGACCCAGCAGGTGGTGGAGATCCAATTCTTTACCAACATTTATTC
>3219_Hemicrepidius_oblongus_Chuncheon_GW
AACACTTTACTTTTTATTTGGAGCCTGATCAGGAATATTAGGTACTTCACTTAGACTTCTAATCCGTGCAGAACTTGGAAACCCCGGCTCACTAATTGGGAATGACCAAATTTATAATGTTATTGTTACAGCTCATGCCTTTATCATAATTTTCTTTATAGTAATACCAATTATAATTGGGGGATTTGGTAACTGATTAGTTCCCTTAATACTAGGAGCCCCTGATATGGCCTTCCCTCGAATAAACAATATAAGATTCTGATTTCTTCCCCCCTCTTTATCACTTTTACTAATAAGAAGAATTGTAGAAAATGGTGCAGGAACAGGTTGAACAGTTTACCCACCTCTTTCGGCTAATATTGCCCATAGAGGATCCTCTGTAGACCTAGCAATTTTCAGTTTACACCTAGCTGGAATCTCTTCAATTCTAGGTGCAGTAAATTTTATTTCCACAGTTATTAATATACGATCAACTGGGATCACATTTGACCGAATACCTTTATTTGTATGGGCAGTAGCCATTACAGCTCTTTTACTTCTGCTATCTCTCCCTGTCCTTGCAGGAGCTATCACTATACTTCTAACTGACCGAAATCTAAATACCTCTTTCTTTGATCCAGCAGGTGGTGGAGACCCAATTCTTTACCAACATTTATTC
>3220_Hemirepidius_oblongus_Chuncheon_GW
AACACTTTACTTTTTATTTGGAGCCTGATCAGGAATATTAGGTACTTCACTTAGACTTCTAATCCGTGCAGAACTTGGAAACCCCGGCTCACTAATTGGGAATGACCAAATTTATAATGTTATTGTTACAGCTCATGCCTTTATCATAATTTTCTTTATAGTAATACCAATTATAATTGGGGGATTTGGTAACTGATTAGTTCCCTTAATACTAGGAGCCCCTGATATGGCCTTCCCTCGAATAAACAATATAAGATTCTGATTTCTTCCCCCCTCTTTATCACTTTTACTAATAAGAAGAATTGTAGAAAATGGTGCAGGAACAGGTTGAACAGTTTACCCACCTCTTTCGGCTAATATTGCCCATAGAGGATCCTCTGTAGACCTAGCAATTTTCAGTTTACACCTAGCTGGAATCTCTTCAATTCTAGGTGCAGTAAATTTTATTTCCACAGTTATTAATATACGATCAACTGGGATCACATTTGACCGAATACCTTTATTTGTATGGGCAGTAGCCATTACAGCTCTTTTACTTCTGCTATCTCTCCCTGTCCTTGCAGGAGCTATCACTATACTTCTAACTGACCGAAATCTAAATACCTCTTTCTTTGATCCAGCAGGTGGTGGGGACCCAATTCTTTACCAACATCTATTC
>2713_Hemicrepidius_oblongus_Mt_Odae_GW
AACACTTTACTTTTTATTTGGAGCCTGATCAGGAATATTAGGTACTTCACTTAGACTTCTAATCCGTGCAGAACTTGGAAACCCCGGCTCACTAATTGGGAATGACCAAATTTATAATGTTATTGTTACAGCTCATGCCTTTATCATAATTTTCTTTATAGTAATACCAATTATAATCGGGGGATTTGGTAACTGATTAGTTCCCTTAATACTAGGAGCCCCTGATATGGCCTTCCCTCGAATAAACAATATAAGATTCTGATTTCTTCCTCCCTCTTTATCACTTTTACTAATAAGAAGAATTGTAGAAAATGGTGCAGGAACAGGTTGAACAGTTTACCCACCTCTTTCGGCTAATATTGCCCATAGAGGATCCTCTGTAGACCTAGCAATTTTCAGTTTACACCTAGCTGGAATCTCTTCAATTCTAGGTGCAGTAAATTTTATTTCCACAGTTATTAATATACGATCAACTGGGATCACATTTGACCGAATACCTTTATTTGTATGAGCAGTAGCCATTACAGCTCTTTTACTTCTTCTATCTCTCCCTGTCCTTGCAGGAGCTATCACTATACTTCTAACTGACCGAAATCTAAATACCTCTTTCTTTGATCCAGCAGGTGGTGGAGACCCAATTCTTTACCAACATTTATTC
>891_Hemicrepidius_oblongus_Yanggu_GW
AACACTTTACTTTTTATTTGGAGCCTGATCAGGAATATTAGGAACTTCACTTAGACTTCTAATCCGCGCAGAACTTGGAAACCCCGGCTCACTAATTGGGAATGACCAAATTTATAATGTTATTGTTACAGCTCATGCCTTTATCATAATTTTCTTTATAGTGATACCAATTATAATTGGGGGATTTGGTAACTGATTAGTTCCCTTAATACTAGGAGCCCCTGATATAGCCTTCCCTCGAATAAACAATATAAGATTCTGATTTCTTCCTCCCTCTTTATCACTTTTACTAATAAGAAGAATTGTAGAAAATGGTGCAGGAACAGGTTGAACAGTTTACCCACCTCTTTCGGCTAATATTGCCCATAGAGGATCCTCTGTAGACCTAGCAATTTTCAGTTTACACCTAGCTGGAATCTCTTCAATTCTAGGTGCAGTAAATTTTATTTCCACAGTTATCAATATACGATCAACTGGAATCACATTTGACCGAATACCTTTATTTGTATGAGCAGTAGCCATTACAGCTCTTTTACTTCTGCTATCTCTCCCTGTCCTTGCAGGAGCTATCACTATACTTCTAACTGACCGAAATCTAAATACCTCTTTCTTTGATCCAGCAGGTGGTGGAGACCCTATTCTTTACCAACATTTATTC
>3218_Hemicrepidius_oblongus_Chuncheon_GW
AACACTTTACTTTTTATTTGGAGCCTGATCAGGAATATTAGGAACTTCACTTAGACTTCTAATCCGCGCAGAACTTGGAAACCCCGGCTCACTAATTGGGAATGACCAAATTTATAATGTTATTGTTACAGCTCATGCCTTTATCATAATTTTCTTTATAGTGATACCAATTATAATTGGGGGCTTTGGTAACTGATTAGTTCCCTTAATACTAGGAGCCCCTGATATAGCCTTCCCTCGAATAAACAATATAAGATTCTGATTTCTTCCTCCCTCTTTATCACTTTTACTAATAAGAAGAATTGTAGAAAATGGGGCAGGAACAGGTTGAACAGTTTACCCACCTCTTTCGGCTAATATTGCCCATAGAGGATCCTCTGTAGACCTAGCAATTTTCAGTTTACACCTAGCTGGAATCTCTTCAATTCTAGGTGCAGTAAATTTTATTTCCACAGTTATCAATATACGATCAACTGGAATCACATTTGACCGAATACCTTTATTTGTATGAGCAGTAGCCATTACAGCTCTTTTACTTCTGCTATCTCTCCCTGTCCTTGCAGGAGCTATCACTATACTTCTAACTGACCGAAATCTAAATACCTCTTTCTTTGATCCAGCAGGTGGTGGAGACCCTATTCTTTACCAACATTTATTC
>952_Hemicrepidius_oblongus_Anyang_GG
AACGCTTTACTTTTTATTTGGAGCCTGATCAGGAATATTAGGAACTTCACTTAGACTTCTAATCCGTGCAGAACTTGGAAACCCCGGCTCACTAATTGGGAATGACCAAATTTATAATGTTATTGTTACAGCTCATGCCTTTATCATAATTTTCTTTATAGTGATACCAATTATAATTGGGGGATTTGGTAACTGATTAGTTCCCTTAATACTAGGAGCCCCTGATATGGCCTTCCCTCGAATAAACAATATAAGATTCTGATTTCTTCCTCCCTCTTTATCACTTTTACTAATAAGAAGAATTGTAGAAAATGGCGCAGGAACAGGTTGAACAGTTTACCCACCTCTTTCGGCTAATATTGCCCATAGAGGATCCTCTGTAGACCTAGCAATTTTCAGTTTACACCTAGCTGGAATCTCTTCAATTCTAGGTGCGGTAAATTTTATTTCCACAGTTATTAATATACGATCAACTGGAATCACATTTGACCGAATACCTTTATTTGTATGAGCAGTAGCCATTACAGCTCTTTTACTTCTGCTATCTCTCCCTGTCCTTGCAGGAGCTATCACTATACTTCTAACTGACCGAAATCTAAATACCTCTTTCTTTGATCCAGCAGGTGGTGGAGACCCTATTCTTTACCAACATTTATTC
>1036_Hemicrepidius_oblongus_Mt_Gyebang_GW
AACACTTTACTTTTTATTTGGAGCCTGATCAGGAATATTAGGAACTTCACTTAGACTTCTAATCCGTGCAGAACTTGGAAACCCCGGCTCACTAATTGGGAATGACCAAATTTATAATGTTATTGTTACAGCTCATGCCTTTATCATAATTTTCTTTATAGTGATACCAATTATAATTGGGGGATTTGGCAACTGATTAGTTCCCTTAATACTAGGAGCCCCTGATATGGCCTTCCCTCGAATAAACAATATAAGATTCTGATTTCTTCCTCCCTCTTTATCACTTTTACTAATAAGAAGAATTGTAGAAAATGGTGCAGGAACAGGTTGAACAGTTTACCCACCTCTTTCGGCTAATATTGCCCATAGAGGATCCTCTGTAGACCTAGCAATTTTCAGTTTACACCTAGCTGGAATCTCTTCAATTCTAGGTGCAGTAAATTTTATTTCCACAGTTATTAATATACGATCAACTGGAATCACATTTGACCGAATACCTTTATTTGTATGAGCAGTAGCCATTACAGCTCTTTTACTTCTACTATCTCTCCCTGTCCTTGCAGGAGCTATCACTATACTTCTAACTGACCGAAATCTAAATACCTCTTTCTTTGATCCAGCAGGTGGTGGAGACCCTATTCTTTACCAACATTTATTC
>2855_Hemicrepidius_oblongus_Misiryeong_Injae_GW
AACACTTTACTTTTTATTTGGAGCCTGATCAGGAATATTAGGAACTTCACTTAGACTTCTAATCCGTGCAGAACTTGGAAACCCCGGCTCACTAATTGGGAATGACCAAATTTATAATGTTATTGTTACAGCTCATGCCTTTATCATAATTTTCTTTATAGTGATACCAATTATAATTGGGGGATTTGGTAACTGATTAGTTCCCTTAATACTAGGAGCCCCTGATATAGCCTTCCCTCGAATAAACAATATAAGATTCTGGTTTCTTCCTCCCTCTTTATCACTTTTACTAATAAGAAGAATTGTAGAAAATGGTGCAGGAACAGGCTGAACAGTTTACCCACCTCTTTCGGCTAATATTGCCCATAGAGGATCCTCTGTAGACCTAGCAATTTTCAGTTTACACCTAGCTGGAATCTCTTCAATTCTAGGTGCAGTAAATTTTATTTCCACAGTTATTAATATACGATCAACTGGAATCACATTTGACCGAATACCTTTATTTGTATGAGCAGTAGCCATTACAGCTCTTTTACTTCTGCTATCTCTCCCTGTCCTTGCAGGAGCTATCACTATACTTCTAACTGACCGAAATCTAAATACCTCTTTCTTTGATCCAGCAGGTGGTGGAGACCCTATTCTTTACCAACATTTATTC
>2875_Hemicrepidius_oblongus_Mt_Bukhan_Seoul
AACACTTTACTTTTTATTTGGAGCCTGATCAGGAATATTAGGAACTTCACTTAGACTTCTAATCCGTGCAGAACTTGGAAACCCCGGCTCACTAATTGGGAATGACCAAATTTATAATGTTATTGTTACAGCTCATGCCTTTATCATAATTTTCTTTATAGTGATACCAATTATAATTGGGGGATTTGGTAACTGATTAGTTCCCTTAATACTAGGAGCCCCTGATATAGCCTTCCCTCGAATAAACAATATAAGATTCTGGTTTCTTCCTCCCTCTTTATCACTTTTACTAATAAGAAGAATTGTAGAAAATGGTGCAGGAACAGGCTGAACAGTTTACCCGCCTCTTTCAGCTAATATTGCCCATAGAGGATCCTCTGTAGACCTAGCAATTTTCAGTTTACACCTAGCTGGAATCTCTTCAATTCTAGGTGCAGTAAATTTTATTTCCACAGTTATTAATATACGATCAACTGGAATCACATTTGACCGAATACCTTTATTTGTATGAGCAGTAGCCATTACAGCTCTTTTACTTCTGCTATCTCTCCCTGTCCTTGCAGGAGCTATCACTATACTTCTAACTGACCGAAATCTAAATACCTCTTTCTTTGATCCAGCAGGTGGTGGAGACCCTATTCTTTACCAACATTTATTC
>2808_Hemicrepidius_oblongus_Namyangju_GG
AACACTTTACTTTTTATTTGGAGCCTGATCAGGAATATTAGGAACTTCACTTAGACTTCTAATCCGTGCAGAACTTGGAAACCCCGGCTCACTAATTGGGAATGACCAAATTTATAATGTTATTGTTACAGCTCATGCCTTTATCATAATTTTCTTTATAGTGATACCAATTATAATTGGGGGATTTGGTAACTGATTAGTTCCCTTAATACTAGGAGCCCCTGATATAGCCTTCCCTCGAATAAACAATATAAGATTCTGGTTTCTTCCCCCCTCTTTATCACTTTTACTAATAAGAAGAATTGTAGAAAATGGTGCAGGAACAGGCTGAACAGTTTACCCGCCTCTTTCGGCTAATATTGCCCATAGAGGATCCTCTGTAGACCTAGCAATTTTCAGTTTACACCTAGCTGGAATCTCTTCAATTCTAGGTGCAGTAAATTTTATTTCCACAGTTATTAATATACGATCAACTGGAATCACATTTGACCGAATACCTTTATTTGTATGAGCAGTAGCCATTACAGCTCTTTTACTTCTGCTATCTCTCCCTGTCCTTGCAGGAGCTATCACTATACTTCTAACTGACCGAAATCTAAATACCTCTTTCTTTGATCCAGCAGGTGGTGGAGACCCTATTCTTTACCAACATTTATTC
>2854_Hemicrepidius_oblongus_Misiryeong_Injae_GW
AACACTTTACTTTTTATTTGGAGCCTGATCAGGAATATTAGGAACTTCACTTAGACTTCTAATCCGTGCAGAACTTGGAAACCCCGGCTCACTAATTGGGAATGACCAAATTTATAATGTTATTGTTACAGCTCATGCCTTTATCATAATTTTCTTTATAGTGATACCAATTATAATTGGGGGATTTGGTAACTGATTAGTTCCCTTAATACTAGGAGCCCCTGATATAGCCTTCCCTCGAATAAACAATATAAGATTCTGGTTTCTTCCTCCCTCTTTATCACTTTTACTAATAAGAAGAATTGTAGAAAATGGTGCAGGAACAGGCTGAACAGTTTACCCGCCTCTTTCGGCTAATATTGCCCATAGAGGATCCTCTGTAGACCTAGCAATTTTCAGTTTACACCTAGCTGGAATCTCTTCAATTCTAGGTGCAGTAAATTTTATTTCCACAGTTATTAATATACGATCAACTGGAATCACATTTGACCGAATACCTTTATTTGTATGAGCAGTAGCCATTACAGCTCTTTTACTTCTGCTATCTCTCCCTGTCCTTGCAGGAGCTATCACTATACTTCTAACTGACCGAAATCTAAATACCTCTTTCTTTGATCCAGCAGGTGGTGGAGACCCTATTCTTTACCAACATTTATTC
>2856_Hemicrepidius_oblongus_Misiryeong_Injae_GW
AACACTTTACTTTTTATTTGGAGCCTGATCAGGAATATTAGGAACTTCACTTAGACTTCTAATCCGTGCAGAACTTGGAAACCCCGGCTCACTAATTGGGAATGACCAAATTTATAATGTTATTGTTACAGCTCATGCCTTTATCATAATTTTCTTTATAGTGATACCAATTATAATTGGGGGATTTGGTAACTGATTAGTTCCCTTAATACTAGGAGCCCCTGATATAGCCTTCCCTCGAATAAACAATATAAGATTCTGGTTTCTTCCTCCCTCTTTATCACTTTTACTAATAAGAAGAATTGTAGAAAATGGTGCAGGAACAGGCTGAACAGTTTACCCGCCTCTTTCGGCTAATATTGCCCATAGAGGATCCTCTGTAGACCTAGCAATTTTCAGTTTACACCTAGCTGGAATCTCTTCAATTCTAGGTGCAGTAAATTTTATTTCCACAGTTATTAATATACGATCAACTGGAATCACATTTGACCGAATACCTTTATTTGTATGAGCAGTAGCCATTACAGCTCTTTTACTTCTGCTATCTCTCCCTGTCCTTGCAGGAGCTATCACTATACTTCTAACTGACCGAAATCTAAATACCTCTTTCTTTGATCCAGCAGGTGGTGGAGACCCTATTCTTTACCAACATTTATTC
>2863_Hemicrepidius_oblongus_Jeongreung_Seoul
AACACTTTACTTTTTATTTGGAGCCTGATCAGGAATATTAGGAACTTCACTTAGACTTCTAATCCGTGCAGAACTTGGAAACCCCGGCTCACTAATTGGGAATGACCAAATTTATAATGTTATTGTTACAGCTCATGCCTTTATCATAATTTTCTTTATAGTGATACCAATTATAATTGGGGGATTTGGTAACTGATTAGTTCCCTTAATACTAGGAGCCCCTGATATAGCCTTCCCTCGAATAAACAATATAAGATTCTGGTTTCTTCCTCCCTCTTTATCACTTTTACTAATAAGAAGAATTGTAGAAAATGGTGCAGGAACAGGCTGAACAGTTTACCCGCCTCTTTCGGCTAATATTGCCCATAGAGGATCCTCTGTAGACCTAGCAATTTTCAGTTTACACCTAGCTGGAATCTCTTCAATTCTAGGTGCAGTAAATTTTATTTCCACAGTTATTAATATACGATCAACTGGAATCACATTTGACCGAATACCTTTATTTGTATGAGCAGTAGCCATTACAGCTCTTTTACTTCTGCTATCTCTCCCTGTCCTTGCAGGAGCTATCACTATACTTCTAACTGACCGAAATCTAAATACCTCTTTCTTTGATCCAGCAGGTGGTGGAGACCCTATTCTTTACCAACATTTATTC
>2864_Hemicrepidius_oblongus_Jeongreung_Seoul
AACACTTTACTTTTTATTTGGAGCCTGATCAGGAATATTAGGAACTTCACTTAGACTTCTAATCCGTGCAGAACTTGGAAACCCCGGCTCACTAATTGGGAATGACCAAATTTATAATGTTATTGTTACAGCTCATGCCTTTATCATAATTTTCTTTATAGTGATACCAATTATAATTGGGGGATTTGGTAACTGATTAGTTCCCTTAATACTAGGAGCCCCTGATATAGCCTTCCCTCGAATAAACAATATAAGATTCTGGTTTCTTCCTCCCTCTTTATCACTTTTACTAATAAGAAGAATTGTAGAAAATGGTGCAGGAACAGGCTGAACAGTTTACCCGCCTCTTTCGGCTAATATTGCCCATAGAGGATCCTCTGTAGACCTAGCAATTTTCAGTTTACACCTAGCTGGAATCTCTTCAATTCTAGGTGCAGTAAATTTTATTTCCACAGTTATTAATATACGATCAACTGGAATCACATTTGACCGAATACCTTTATTTGTATGAGCAGTAGCCATTACAGCTCTTTTACTTCTGCTATCTCTCCCTGTCCTTGCAGGAGCTATCACTATACTTCTAACTGACCGAAATCTAAATACCTCTTTCTTTGATCCAGCAGGTGGTGGAGACCCTATTCTTTACCAACATTTATTC
>2871_Hemicrepidius_oblongus_Mt_Bukhan_Seoul
AACACTTTACTTTTTATTTGGAGCCTGATCAGGAATATTAGGAACTTCACTTAGACTTCTAATCCGTGCAGAACTTGGAAACCCCGGCTCACTAATTGGGAATGACCAAATTTATAATGTTATTGTTACAGCTCATGCCTTTATCATAATTTTCTTTATAGTGATACCAATTATAATTGGGGGATTTGGTAACTGATTAGTTCCCTTAATACTAGGGGCCCCTGATATAGCCTTCCCTCGAATAAACAATATAAGATTCTGGTTTCTTCCTCCCTCTTTATCACTTTTACTAATAAGAAGAATTGTAGAAAATGGTGCAGGAACAGGCTGAACAGTTTACCCGCCTCTTTCGGCTAATATTGCCCATAGAGGATCCTCTGTAGACCTAGCAATTTTCAGTTTACACCTAGCTGGAATCTCTTCAATTCTAGGTGCAGTAAATTTTATTTCCACAGTTATTAATATACGATCAACTGGAATCACATTTGACCGAATACCTTTATTTGTATGAGCAGTAGCCATTACAGCTCTTTTACTTCTGCTATCTCTCCCTGTCCTTGCAGGAGCTATCACTATACTTCTAACTGACCGAAATCTAAATACCTCTTTCTTTGATCCAGCAGGTGGTGGAGACCCTATTCTTTACCAACATTTATTC
>2891_Hemicrepidius_oblongus_Mt_Bukhan_Seoul
AACACTTTACTTTTTATTTGGAGCCTGATCAGGAATATTAGGAACTTCACTTAGACTTCTAATCCGTGCAGAACTTGGAAACCCCGGCTCACTAATTGGGAATGACCAAATTTATAATGTTATTGTTACAGCTCATGCCTTTATCATAATTTTCTTTATAGTGATACCAATTATAATTGGGGGATTTGGTAACTGATTAGTTCCCTTAATACTAGGAGCCCCTGATATAGCCTTCCCTCGAATAAACAATATAAGATTCTGGTTTCTTCCTCCCTCTTTATCACTTTTACTAATAAGAAGAATTGTAGAAAATGGTGCAGGAACAGGCTGAACAGTTTACCCGCCTCTTTCGGCTAATATTGCCCATAGAGGATCCTCTGTAGACCTAGCAATTTTCAGTTTACACCTAGCTGGAATCTCTTCAATTCTAGGTGCAGTAAATTTTATTTCCACAGTTATTAATATACGATCAACTGGAATCACATTTGACCGAATACCTTTATTTGTATGAGCAGTAGCCATTACAGCTCTTTTACTTCTGCTATCTCTCCCTGTCCTTGCAGGAGCTATCACTATACTTCTAACTGACCGAAATCTAAATACCTCTTTCTTTGATCCAGCAGGTGGTGGAGACCCTATTCTTTACCAACATTTATTC
>2395_Hemicrepidius_oblongus_Primorsky_Russia
-------------------------------------------------------------------------------------------------------------------------------------------------------------------------------------------------------------------------------------------------------------------------------------------------------------ATCGTTGAAAACGGTGCAGGAACAGGTTGAACAGTTTACCCACCTCTTTCGGCTAATATCGCCCATAGAGGATCCTCTGTAGACCTAGCAATTTTCAGTTTACACCTAGCTGGAATCTCTTCAATTCTAGGTGCAGTAAATTTTATTTCCACAGTTATTAATATACGATCAACTGGAATCACATTTGACCGAATACCTTTATTTGTATGAGCAGTAGCCATTACAGCTCTTTTACTTCTGCTATCTCTCCCTGTCCTTGCAGGAGCTATCACTATACTTCTAACTGACCGAAATCTAAATACCTCTTTCTTTGATCCAGCAGGTGGTGGAGACCCTATCCTTTACCAACATTTATTC
>2396_Hemicrepidius_oblongus_Primorsky_Russia
-------------------------------------------------------------------------------------------------------------------------------------------------------------------------------------------------------------------------------------------------------------------------------------------------------------ATCGTTGAAAACGGTGCAGGAACAGGTTGAACAGTTTACCCACCTCTTTCGGCTAATATCGCCCATAGAGGATCCTCTGTAGACCTAGCAATTTTCAGTTTACACCTAGCTGGAATCTCTTCAATTCTAGGTGCAGTAAATTTTATTTCCACAGTTATTAATATACGATCAACTGGAATCACATTTGACCGAATACCTTTATTTGTATGAGCAGTAGCCATTACAGCTCTTTTACTTCTGCTATCTCTCCCTGTCCTTGCAGGAGCTATCACTATACTTCTAACTGACCGAAATCTAAATACCTCTTTCTTTGATCCAGCAGGTGGTGGAGACCCTATCCTTTACCAACATTTATTC
>2524_Hemicrepidius_sinuatus_sinuatus_Tokyo_Honshu_Japan
AACACTATACTTTTTATTCGGAGCCTGATCAGGGATATTAGGAACTTCGCTAAGACTATTAATCCGTGCAGAACTTGGAAATCCCGGCTCACTTATTGGGAATGACCAAATTTATAATGTTATTGTTACAGCTCATGCCTTTATCATAATTTTCTTTATAGTTATACCAATTATAATTGGAGGATTCGGTAACTGATTAGTCCCTCTAATACTAGGAGCCCCTGATATAGCTTTCCCTCGAATAAACAATATAAGATTCTGATTCCTACCTCCCTCTCTTTCACTTTTACTAATAAGAAGAATTGTAGAAAATGGTGCAGGAACAGGATGAACAGTTTACCCTCCTCTTTCGGCTAATATTGCCCATAGAGGATCCTCTGTAGACCTAGCAATTTTCAGTTTACACCTAGCTGGTATCTCTTCAATTTTAGGGGCAGTAAATTTTATTTCTACGGTAATTAATATACGATCAACCGGAATCACATTTGACCGAATACCTTTATTTGTATGAGCAGTAGCTATTACAGCCCTTCTCCTTCTTCTTTCTCTTCCTGTCCTTGCAGGAGCTATCACAATACTTCTTACTGACCGAAACTTAAACACCTCTTTCTTTGATCCAGCAGGTGGTGGAGATCCTATTCTTTATCAACACTTATTT
>206_Hemicrepidius_seccesus_seccessus_Japan
AACACTATACTTTTTATTCGGAGCCTGATCAGGAATATTAGGAACTTCGCTAAGACTATTAATCCGTGCAGAACTTGGGAACCCCGGCTCACTTATTGGGAATGACCAAATTTATAATGTTATTGTTACAGCTCATGCCTTTATCATAATTTTCTTTATAGTTATGCCAATTATAATTGGGGGATTTGGTAACTGATTAGTCCCTCTAATACTAGGGGCCCCTGATATAGCTTTCCCTCGAATAAACAATATAAGATTCTGATTCCTACCCCCTTCTCTTTCACTTTTACTAATAAGAAGAATTGTAGAAAACGGTGCAGGAACAGGATGAACAGTTTATCCTCCTCTTTCGGCTAATATTGCCCATAGAGGATCCTCTGTAGACCTAGCAATTTTCAGTCTACATCTAGCTGGTATCTCTTCAATTCTAGGAGCGGTAAATTTTATTTCTACGGTAATTAATATACGATCAACCGGAATCACGTTTGACCGAATACCTTTATTTGTATGAGCAGTAGCTATCACAGCCCTTCTACTTCTCCTTTCTCTTCCTGTCCTTGCAGGAGCTATCACAATACTTCTTACTGATCGAAACTTGAATACCTCTTTCTTTGACCCAGCAGGTGGCGGAGACCCCATTCTTTACCAACACTTATTT
>2520_Hemicrepidius_seccessus_seccessus_Japan
AACACTATACTTTTTATTCGGAGCCTGATCAGGAATATTAGGAACTTCGCTAAGACTATTAATCCGTGCAGAACTTGGGAACCCCGGCTCACTTATTGGGAATGACCAAATTTATAATGTTATTGTTACAGCTCATGCCTTTATCATAATTTTCTTTATAGTTATGCCAATTATAATTGGGGGATTTGGTAACTGATTAGTCCCTCTAATACTAGGGGCCCCTGATATAGCTTTCCCTCGAATAAACAATATAAGATTCTGATTCCTACCCCCTTCTCTTTCACTTTTACTAATAAGAAGAATTGTAGAAAACGGTGCAGGAACAGGATGAACAGTTTATCCTCCTCTTTCGGCTAATATTGCCCATAGAGGATCCTCTGTAGACCTAGCAATTTTCAGTCTACATCTAGCTGGTATCTCTTCAATTCTAGGAGCGGTAAATTTTATTTCTACGGTAATTAATATACGATCAACCGGAATCACGTTTGACCGAATACCTTTATTTGTATGAGCAGTAGCTATCACAGCCCTTCTACTTCTCCTTTCTCTTCCTGTCCTTGCAGGAGCTATCACAATACTTCTTACTGATCGAAACTTGAATACCTCTTTCTTTGACCCAGCAGGTGGCGGAGACCCCATTCTTTACCAACACTTATTT
>2521_Hemicrepidius_seccessus_seccessus_Japan
AACACTATACTTTTTATTCGGAGCCTGATCAGGAaTATTAGGAACTTCGCTAAGACTATTAATCCGTGCAGAACTTGGGAACCCCGGCTCACTTATTGGGAATGACCAAATTTATAATGTTATTGTTACAGCTCATGCCTTTATCATAATTTTCTTTATAGTTATGCCAATTATAATTGGGGGATTTGGTAACTGATTAGTCCCTCTAATACTAGGGGCCCCTGATATAGCTTTCCCTCGAATAAACAATATAAGATTCTGATTCCTACCCCCTTCTCTTTCACTTTTACTAATAAGAAGAATTGTAGAAAACGGTGCAGGAACAGGATGAACAGTTTATCCTCCTCTTTCGGCTAATATTGCCCATAGAGGATCCTCTGTAGACCTAGCAATTTTCAGTCTACATCTAGCTGGTATCTCTTCAATTCTAGGAGCGGTAAATTTTATTTCTACGGTAATTAATATACGATCAACCGGAATCACGTTTGACCGAATACCTTTATTTGTATGAGCAGTAGCTATCACAGCCCTTCTACTTCTCCTTTCTCTTCCTGTCCTTGCAGGAGCTATCACAATACTTCTTACTGATCGAAACTTGAATACCTCTTTCTTTGACCCAGCAGGTGGCGGAGACCCCATTCTTTACCAACACTTATTT
>2522_Hemicrepidius_seccessus_seccessus_Japan
AACACTATACTTTTTATTCGGAGCCTGATCAGGAATATTAGGAACTTCGCTAAGACTATTAATCCGTGCAGAACTTGGGAACCCCGGCTCACTTATTGGGAATGACCAAATTTATAATGTTATTGTTACAGCTCATGCCTTTATCATAATTTTCTTTATAGTTATGCCAATTATAATTGGGGGATTTGGTAACTGATTAGTCCCTCTAATACTAGGGGCCCCTGATATAGCTTTCCCTCGAATAAACAATATAAGATTCTGATTCCTACCCCCTTCTCTTTCACTTTTACTAATAAgAAgAATTGTAgAAAACGGTGCAGGAACAGGATGAACAGTTTATCCTCCTCTTTCGGCTAATATTGCCCATAgAGGATCCTCTGTAgACCTAGCAATTTTCAGTCTACATCTAGCTGGTATCTCTTCAATTCTAGGAGCGGTAAATTTTATTTCTACGGTAATTAATATACGATCAACCGGAATCACGTTTGACCGAATACCTTTATTTGTATGAGCAGTAGCTATCACAGCCCTTCTACTTCTCCTTTCTCTTCCTGTCCTTGCAGGAGCTATCACAATACTTCTTACTGATCGAAACTTGAATACCTCTTTCTTTGACCCAGCAGGTGGCGGAGACCCCATTCTTTACCAACACTTATTT
>2523_Hemicrepidius_seccessu_seccessus_Nagano_Honshu_Japan
AACACTATACTTTTTATTCGGAGCCTGATCAGGAATATTAGGAACTTCGCTAAGACTATTAATCCGTGCAGAACTTGGAAACCCCGGCTCACTTATTGGGAATGACCAAATTTATAATGTTATTGTTACAGCTCATGCCTTTATCATAATTTTCTTTATAGTTATGCCAATTATAATTGGGGGATTCGGTAACTGATTAGTCCCTCTAATACTAGGGGCCCCTGATATAGCTTTCCCTCGAATAAACAATATAAGATTCTGATTCCTACCCCCTTCTCTTTCACTTTTACTAATAAGAAGAATTGTAGAAAACGGCGCAGGAACAGGATGAACAGTTTATCCTCCTCTTTCGGCTAATATTGCCCATAGAGGATCCTCTGTAGACCTAGCAATTTTCAGTCTACATCTAGCTGGTATCTCTTCAATTCTAGGAGCGGTAAATTTTATTTCTACGGTAATTAATATACGATCAACCGGAATCACGTTTGACCGAATACCTTTATTTGTATGAGCAGTAGCTATCACAGCCCTTCTACTTCTCCTTTCTCTTCCTGTCCTTGCAGGAGCTATCACAATACTTCTTACTGATCGAAACTTGAATACCTCTTTCTTTGACCCAGCAGGTGGTGGAGACCCCATTCTTTACCAACACTTATTT
>2525_Hemicrepidius_seccessus_seccessus_Gifu_Honshu_Japan
AACACTATACTTTTTATTCGGAGCCTGATCAGGAATATTAGGAACTTCGCTAAGACTATTAATCCGTGCAGAACTTGGAAACCCCGGCTCACTTATTGGGAATGACCAAATTTATAATGTTATTGTTACAGCTCATGCCTTTATCATAATTTTCTTTATAGTTATGCCAATCATAATTGGGGGATTCGGTAACTGATTAGTTCCTCTAATACTAGGGGCCCCTGATATAGCTTTCCCTCGAATAAACAATATAAGATTCTGATTCCTACCCCCTTCTCTTTCACTTTTACTAATAAGAAGAATTGTAGAAAACGGCGCAGGAACAGGATGAACAGTTTATCCTCCTCTCTCGGCTAATATTGCCCATAGAGGATCCTCTGTAGACCTAGCAATTTTCAGCCTACATCTAGCTGGTATCTCTTCAATTCTAGGGGCGGTAAATTTTATTTCTACGGTAATTAATATACGATCAACCGGAATCACGTTTGACCGAATACCTTTATTTGTATGAGCAGTAGCTATCACAGCCCTTCTACTTCTCCTTTCTCTTCCTGTCCTTGCAGGAGCTATCACAATACTTCTTACTGATCGAAACTTGAATACCTCTTTCTTTGACCCAGCAGGTGGTGGAGACCCCATTCTTTACCAACACTTATTT
>1131_Hemicrepidius_seccessus_seccessus_Ibaraki_Honshu_Japan
AACACTATACTTTTTATTCGGAGCCTGATCAGGAATATTAGGAACTTCGCTAAGACTATTAATCCGTGCAGAACTTGGAAACCCCGGCTCACTTATTGGGAATGACCAAATTTATAATGTTATTGTTACAGCTCATGCCTTTATCATAATTTTCTTTATAGTTATGCCAATTATAATTGGGGGATTCGGTAACTGATTAGTCCCTCTAATACTAGGGGCCCCTGATATAGCTTTCCCTCGAATAAACAATATAAGATTCTGATTCCTACCTCCTTCTCTTTCACTTTTACTAATAAGAAGAATTGTAGAAAACGGCGCAGGAACAGGATGAACAGTTTATCCTCCTCTTTCGGCTAATATTGCCCATAGAGGATCCTCTGTAGACCTAGCAATTTTCAGTCTGCATCTAGCTGGTATCTCTTCAATTCTAGGAGCGGTAAATTTTATTTCTACGGTAATTAATATACGATCAACCGGAATCACGTTTGATCGAATACCTTTATTTGTATGAGCAGTAGCTATCACAGCCCTTCTACTTCTCCTTTCTCTTCCTGTCCTTGCAGGAGCTATCACAATACTTCTTACTGATCGTAACTTGAATACCTCTTTCTTTGACCCAGCAGGTGGTGGAGACCCCATTCTTTACCAACACTTATTT
>1132_Hemicrepidius_seccessus_seccessus_Ibaraki_Honshu_Japan
AACACTATACTTTTTATTCGGAGCCTGATCAGGAATATTAGGAACTTCGCTAAGACTATTAATCCGTGCAGAACTTGGAAACCCCGGCTCACTTATTGGGAATGACCAAATTTATAATGTTATTGTTACAGCTCATGCCTTTATCATAATTTTCTTTATAGTTATGCCAATTATAATTGGGGGATTCGGTAACTGATTAGTCCCTCTAATACTAGGGGCCCCTGATATAGCTTTCCCTCGAATAAACAATATAAGATTCTGATTCCTACCTCCTTCTCTTTCACTTTTACTAATAAGAAGAATTGTAGAAAACGGTGCAGGAACAGGATGAACAGTTTATCCTCCTCTCTCGGCTAATATTGCCCATAGAGGATCCTCTGTAGACCTGGCAATTTTCAGTCTGCATCTAGCTGGTATCTCTTCAATTCTAGGAGCGGTAAATTTTATTTCTACGGTAATTAATATACGATCAACCGGAATCACGTTTGACCGAATACCTTTATTTGTATGAGCAGTAGCTATCACAGCCCTTCTACTTCTCCTTTCTCTTCCTGTCCTTGCAGGAGCTATCACAATACTTCTTACTGATCGAAACTTGAATACCTCTTTCTTTGACCCAGCAGGTGGTGGAGACCCCATTCTTTACCAACACTTATTT
>3077_Hemicrepidius_seccessus_Ibaraki_Honshu_Japan
AACACTATACTTTATCTTCGGAGCCTGATCAGGAATATTAGGAACTTCGCTAAGACTATTAATCCGCGCAGAACTTGGAAATCCCGGATCACTTATTGGGAATGACCAAATTTATAATGTTATTGTTACAGCTCATGCCTTTATCATAATTTTCTTTATAGTTATGCCAATTATAATTGGAGGATTCGGTAACTGATTAGTCCCTCTAATACTAGGGGCCCCTGATATAGCTTTCCCTCGAATAAACAATATAAGATTCTGATTCCTACCCCCTTCCCTTTCACTTTTACTAATAAGAAGAATTGTAGAAAACGGCGCAGGAACAGGATGAACAGTTTATCCTCCTCTTTCGGCTAATATTGCCCATAGAGGGTCCTCTGTAGACCTAGCAATTTTCAGTTTACATCTAGCTGGTATCTCTTCAATTCTAGGAGCGGTAAATTTCATTTCTACGGTAATTAACATACGATCAACCGGAATCACATTTGACCGAATACCTTTATTTGTATGAGCAGTAGCTATCACAGCCCTTCTACTTCTTCTTTCTCTTCCTGTCCTTGCAGGAGCTATCACAATACTTCTTACTGATCGAAACTTGAACACCTCTTTCTTTGATCCAGCAGGTGGTGGAGACCCCATTCTTTACCAACACTTATTT
>3078_Hemicrepidius_seccessus_Ibaraki_Honshu_Japan
AACACTATACTTTATCTTCGGAGCCTGATCAGGAATATTAGGAACTTCGCTAAGACTATTAATCCGCGCAGAACTTGGGAATCCCGGATCACTTATTGGGAATGACCAAATTTATAATGTTATTGTTACAGCTCATGCCTTTATCATAATTTTCTTTATAGTTATGCCAATTATAATTGGAGGATTCGGTAACTGATTAGTCCCTCTAATACTAGGGGCCCCTGATATAGCTTTCCCTCGAATAAACAATATAAGATTCTGATTCCTACCCCCTTCCCTTTCACTTTTACTAATAAGAAGAATTGTAGAAAACGGCGCAGGAACAGGATGAACAGTTTATCCTCCTCTTTCGGCTAATATTGCCCATAGAGGGTCCTCTGTAGACCTAGCAATTTTCAGTTTACATCTAGCTGGTATCTCTTCAATTCTAGGAGCGGTAAATTTCATTTCTACGGTAATTAACATACGATCAACCGGAATCACATTTGACCGAATACCTTTATTTGTATGAGCAGTAGCTATCACAGCCCTTCTACTTCTTCTTTCTCTTCCTGTCCTTGCAGGAGCTATCACAATACTTCTTACTGATCGAAACTTGAACACCTCTTTCTTTGATCCAGCAGGTGGTGGAGACCCCATTCTTTACCAACACTTATTT
>1133_Hemicrepidius_desertor_desertor_Ibaraki_Honshu_Japan
AACACTCTACTTCCTTTTTGGAGCATGAGCAGGGATATTAGGTACCTCCTTAAGCCTATTAATTCGTGCAGAACTTGGTAATCCAGGATCACTAATTGGAAATGACCAAATTTACAACGTAATTGTCACAGCCCACGCCTTCATCATAATTTTTTTCATAGTTATGCCAATTATAATTGGAGGGTTTGGTAATTGACTTGTTCCCCTAATATTAGGAGCTCCAGACATAGCATTCCCTCGAATAAATAACATAAGATTCTGGTTTCTACCCCCCTCTCTATCACTTTTACTGATAAGAAGAATTGTAGAAAATGGGGCCGGAACAGGATGAACTGTTTACCCTCCTCTTTCAGCAAATATTGCCCATAGAGGGTCTTCTGTAGATCTAGCTATTTTTAGATTACATTTAGCAGGAATTTCTTCAATTCTAGGGGCTGTAAATTTTATCTCAACAGTAATTAATATACGATCAACTGGAATTACATTTGATCGAATACCCTTGTTTGTATGAGCTGTAGCTATTACAGCCCTCCTGCTTCTTCTGTCTCTCCCGGTTCTTGCAGGAGCAATTACTATACTTTTAACTGATCGAAACTTAAACACTTCATTCTTTGACCCTGCAGGTGGAGGTGACCCGATTCTTTATCAACACTTATTT
>1138_Hemicrepidius_desertor_desertor_Mt_Fuji_Honshu_Japan
AACACTCTACTTCCTTTTTGGAGCATGAGCAGGAATATTAGGTACCTCCTTAAGCCTATTAATTCGTGCAGAACTTGGTAATCCAGGATCACTAATTGGAAATGACCAAATTTACAACGTAATTGTCACAGCCCACGCCTTCATCATAATTTTTTTCATAGTTATGCCAATTATAATTGGAGGGTTTGGTAATTGACTTGTTCCCCTAATATTAGGAGCTCCAGACATAGCATTCCCTCGAATAAATAACATAAGATTCTGGTTTCTACCCCCCTCTCTATCACTTTTACTGATAAGAAGAATTGTAGAAAATGGGGCCGGAACAGGATGAACTGTTTACCCTCCTCTTTCAGCAAATATTGCCCATAGAGGGTCTTCTGTAGATCTAGCTATTTTTAGATTACATTTAGCAGGAATTTCTTCAATTCTAGGGGCTGTAAATTTTATCTCAACAGTAATTAATATACGATCAACTGGAATTACATTTGATCGAATACCCTTGTTTGTATGAGCTGTAGCTATTACAGCCCTCCTACTTCTTCTGTCTCTCCCGGTTCTTGCAGGAGCAATTACTATACTTTTAACTGATCGAAACTTAAACACTTCATTCTTTGACCCTGCAGGTGGAGGTGACCCGATTCTTTATCAACACTTATTT
>Hemicrepidius_niger_Austria_HM542060
----------------------------------------GGAACTTCTTTAAGCCTACTAATCCGAGCAGAACTTGGTAACCCAGGGTCACTAATTGGGAATGACCAAATTTATAATGTTATTGTTACAGCCCATGCCTTTATCATAATTTTCTTTATAGTTATACCAATTATAATTGGAGGATTTGGCAACTGATTAGTCCCTCTAATACTAGGAGCCCCAGATATAGCCTTTCCCCGAATAAACAATATAAGATTCTGATTTTTGCCCCCTTCTCTATCCCTTTTATTAATAAGAAGAATTGTAGAAAACGGTGCAGGGACAGGCTGAACAGTGTACCCCCCACTATCAGCAAACATTGCCCACAGAGGGTCTTCTGTAGACCTGGCTATTTTTAGGCTACACTTGGCAGGAATTTCATCAATTCTAGGTGCTGTAAACTTCATCTCAACAGTAATCAACATACGATCAACCGGAATCACATTTGATCGTATACCCCTATTTGTATGAGCAGTGGCTATTACAGCCCTTTTACTTCTCTTGTCTCTACCAGTTCTAGCAGGAGCCATCACTATACTTTTAACTGACCGAAATTTAAATACGTCATTTTTTGACCCAGCTGGAGGCGGTGACCCCATCCTTTACCAACACCTATTT
>Hemicrepidius_memnonius_Ontario_Canada_AY165705
-------------------GGAGCATGAGCAGGAATGCTAGGAACTTCATTAAGACTATTAATTCGAGCAGAACTTGGTAATCCAGGATCACTTATTGGAAATGACCAAATCTACAATGTCATTGTAACAGCTCATGCTTTTATCATAATTTTCTTTATAGTAATACCAATTATAATTGGAGGATTCGGAAATTGATTAGTTCCCCTAATACTAGGAGCTCCAGATATGGCTTTCCCTCGAATAAATAATATAAGATTTTGGTTTCTACCTCCTTCCCTCTCTCTGTTACTAATAAGAAGAATTGTAGAAAATGGTGCAGGAACAGGATGAACTGTTTACCCACCTCTATCAGCAAATATTGCCCATAGAGGTTCCTCAGTAGATCTTGCTATTTTTAGACTACACCTAGCAGGGATCTCATCAATTCTAGGAGCTGTAAACTTTATTTCTACAGTAATTAATATACGATCAACCGGAATTACATTTGATCGGATACCTTTATTTGTATGAGCTGTTGTTATTACAGCCCTTCTATTACTTTTATCTCTTCCTGTTCTTGCAGGAGCAATCACTATACTTTTAACAGATCGAAATCTAAATACTTCATTCTTTGACCCTGCAGGAGGAGGAGATCCTATTCTA---------------
>3292_Miwacrepidius_rubriventris_Gapyeong_GG_KF442243
AACACTATACTTTTTATTTGGAGCCTGATCAGGAATATTAGGAACTTCTCTAAGCCTTCTAATCCGTGCCGAACTTGGAAACCCTGGTTCACTAATCGGGAATGACCAAATTTATAATGTTATCGTTACAGCTCATGCCTTCATCATAATTTTCTTTATAGTTATGCCAATTATAATTGGGGGATTCGGAAACTGATTAGTCCCTTTAATACTAGGAGCCCCTGACATAGCCTTCCCTCGTATAAACAACATAAGATTTTGATTTCTTCCTCCGTCGCTCTCACTTCTTCTAATAAGAAGAATTGTAGAAAATGGTGCAGGAACAGGCTGAACAGTCTATCCTCCCCTTTCAGCTAATATTGCTCACAGAGGGTCCTCCGTAGACCTAGCCATTTTCAGTTTACATCTAGCCGGAATCTCCTCAATTCTAGGAGCAGTAAATTTTATCTCTACAGTAATTAATATACGATCAACCGGAATCACATTTGACCGCATGCCTTTATTTGTATGAGCAGTAGCTATCACAGCTCTTTTACTTCTCCTGTCACTTCCTGTCCTTGCAGGAGCTATCACGATACTTCTAACTGACCGAAATTTAAACACCTCATTCTTTGACCCGGCAGGAGGTGGGGACCCCATTCTCTACCAACACTTATTT
>3442_Miwacrepidius_rubriventris_Jeongseon_GW_KF442244
AACACTATACTTTTTATTTGGAGCCTGATCAGGAATATTAGGAACTTCTCTAAGCCTTCTAATCCGTGCCGAACTTGGAAACCCTGGTTCACTAATCGGGAATGACCAAATTTATAATGTTATCGTTACAGCTCATGCCTTCATCATAATTTTCTTTATAGTTATGCCAATTATAATTGGGGGATTCGGAAACTGATTAGTCCCTTTAATACTAGGAGCCCCTGACATAGCCTTCCCTCGTATAAACAACATAAGATTTTGATTTCTTCCTCCGTCGCTCTCACTTCTTCTAATAAGAAGAATTGTAGAAAATGGTGCAGGAACAGGCTGAACAGTCTATCCTCCCCTTTCAGCTAATATTGCTCACAGAGGGTCCTCCGTAGACCTAGCCATTTTCAGTTTACATCTAGCCGGAATCTCCTCAATTCTAGGAGCAGTAAATTTTATCTCTACAGTAATTAATATACGATCAACCGGAATCACATTTGACCGCATGCCTTTATTTGTATGAGCAGTAGCTATCACAGCTCTTTTACTTCTCCTGTCACTTCCTGTCCTTGCAGGAGCTATCACGATACTTCTAACTGACCGAAATTTAAACACCTCATTCTTTGACCCAGCAGGAGGTGGAGACCCCATTCTCTACCAACACTTATTT
>3443_Miwacrepidius_rubriventris_Jeongseon_GW_KF442245
AACACTATACTTTTTATTTGGAGCCTGATCAGGAATATTAGGAACTTCTCTAAGCCTTCTAATCCGTGCCGAACTTGGAAACCCTGGTTCACTAATCGGGAATGACCAAATTTATAATGTTATCGTTACAGCTCATGCCTTCATCATAATTTTCTTTATAGTTATGCCAATTATAATTGGGGGATTCGGAAACTGATTAGTCCCTTTAATACTAGGAGCCCCTGACATAGCCTTCCCTCGTATAAACAACATAAGATTTTGATTTCTTCCTCCGTCGCTCTCACTTCTTCTAATAAGAAGAATTGTAGAAAATGGTGCAGGAACAGGCTGAACAGTCTATCCTCCCCTTTCAGCTAATATTGCTCACAGAGGGTCCTCCGTAGACCTAGCCATTTTCAGTTTACATCTAGCCGGAATCTCCTCAATTCTAGGAGCAGTAAATTTTATCTCTACAGTAATTAATATACGATCAACCGGAATCACATTTGACCGCATGCCTTTATTTGTATGAGCAGTAGCTATCACAGCTCTTTTACTTCTCCTGTCACTTCCTGTCCTTGCAGGAGCTATCACGATACTTCTAACTGACCGAAATTTAAACACCTCATTCTTTGACCCAGCAGGAGGTGGGGACCCCATTCTCTACCAACACTTATTT
>3650_Miwacrepidius_subcyaneus_Honshu_Japan_KF442247
----------------------GCCTGATCAGGAATATTAGGTACTTCTTTAAGCCTTCTAATCCGTGCAGAACTTGGGAATCCCGGTTCACTAATTGGGAACGACCAAATTTATAATGTTATCGTTACAGCTCATGCTTTCATCATAATTTTCTTTATAGTTATACCAATCATGATTGGGGGGTTCGGAAACTGACTAGTTCCTTTAATACTAGGAGCCCCTGATATAGCCTTCCCTCG----------------------------------------------------------------------------------------------------------------------------------------------------------------------------------------------------------------------------------------------------------------------------------------------------------------------------------------------------------------------------------------------------------------------------------
>3682_Miwacrepidius_subcyaneus_Honshu_Japan_KF442246
AACACTATACTTTTTATTTGGAGCCTGATCAGGAATATTAGGTACTTCTTTAAGCCTTCTAATCCGTGCAGAACTTGGGAATCCCGGTTCACTAATTGGGAACGACCAAATTTATAATGTTATCGTTACAGCTCATGCTTTCATCATAATTTTCTTTATAGTTATACCAATCATGATTGGGGGGTTCGGAAACTGACTAGTTCCTTTAATACTAGGAGCCCCTGATATAGCCTTCCCTCGTATAAACAATATAAGATTTTGATTTCTTCCCCCATCCCTTTCACTTCTTCTAATAAGAAGAATCGTTGAAAATGGTGCAGGAACAGGTTGAACAGTTTACCCTCCCCTCTCAGCCAATATTGCCCACAGAGGGTCCTCCGTAGACCTAGCGATTTTCAGTTTACACCTAGCCGGAATCTCCTCAATTCTGGGAGCAGTAAATTTTATCTCAACAGTAATTAATATACGATCAACTGGAATCACATTTGATCGGATACCTTTATTTGTATGAGCAGTAGCCATTACAGCTCTTTTGCTTCTCTTGTCTCTTCCTGTGCTTGCAGGAGCTATCACAATACTTCTAACTGACCGAAATTTAAAC---------------------------------------------------------
>2581_Yukara_inornatus_Sakhalin_Russia
AACACTCTACTTCCTTTTTGGAGCATGAGCAGGAATATTAGGAACTTCGTTAAGCCTATTAATTCGAGCAGAACTTGGTAACCCAGGGTCACTAATTGGGAATGACCAAATTTATAATGTTATTGTAACAGCCCACGCCTTTATCATAATTTTCTTTATAGTAATACCAATCATAATTGGAGGATTCGGTAATTGATTAGTACCTCTAATATTAGGAGCCCCAGATATAGCCTTCCCTCGAATAAACAACATGAGATTTTGATTTCTTCCTCCCTCTCTTTCCCTCCTTCTAATAAGAAGAATTGTAGAAAACGGAGCAGGAACAGGATGAACTGTTTATCCACCTTTATCAGCAAATATTGCACATAGAGGATCTTCAGTAGATTTAGCCATTTTTAGTTTACATTTGGCAGGAATTTCCTCAATTTTAGGAGCAGTAAACTTTATTTCAACAGTGATTAACATACGATCAACTGGAATTACATTTGATCGAATACCTCTATTCGTTTGAGCTGTAGTAATCACGGCTCTACTCCTCTTACTTTCATTACCTGTCCTTGCTGGAGCTATCACTATACTCCTAACTGACCGAAATCTAAACACTTCATTTTTTGACCCTGCAGGAGGAGGTGACCCAATTCTATACCAGCATTTATTT
>2584_Yukara_inornatus_Sakhalin_Russia
AACACTCTACTTCCTTTTTGGAGCATGAGCAGGAATATTAGGAACTTCGTTAAGCCTATTAATTCGAGCAGAACTTGGTAACCCAGGGTCACTAATTGGGAATGACCAAATTTATAATGTTATTGTAACAGCCCACGCCTTTATCATAATTTTCTTTATAGTAATACCAATCATAATTGGAGGATTCGGTAATTGATTAGTACCTCTAATATTAGGAGCCCCAGATATAGCCTTCCCTCGAATAAACAACATGAGATTTTGATTTCTTCCTCCCTCTCTTTCCCTCCTTCTAATAAGAAGAATTGTAGAAAACGGAGCAGGAACAGGATGAACTGTTTATCCACCTTTATCAGCAAATATTGCACATAGAGGATCTTCAGTAGATTTAGCCATTTTTAGTTTACATTTGGCAGGAATTTCCTCAATTTTAGGAGCAGTAAACTTTATTTCAACAGTGATTAACATACGATCAACTGGAATTACATTTGATCGAATACCTCTATTCGTTTGAGCTGTAGTAATCACGGCTCTACTCCTCTTACTTTCATTACCTGTCCTTGCTGGAGCTATCACTATACTCCTAACTGATCGAAATCTAAACACTTCATTTTTTGACCCTGCAGGAGGAGGTGACCCAATTCTATACCAGCATTTATTT
>2587_Yukara_inornatus_Sakhalin_Russia
AACACTCTACTTCCTTTTTGGAGCATGAGCAGGAATATTAGGAACTTCGTTAAGCCTATTAATTCGAGCAGAACTTGGTAACCCAGGGTCACTAATTGGGAATGACCAAATTTATAATGTTATTGTAACAGCCCACGCCTTTATCATAATTTTCTTTATAGTAATACCAATCATAATTGGAGGATTCGGTAATTGATTAGTACCTCTAATATTAGGAGCCCCAGATATAGCCTTCCCTCGAATAAACAACATGAGATTTTGATTTCTTCCTCCCTCTCTTTCCCTCCTTCTAATAAGAAGAATTGTAGAAAACGGAGCAGGAACAGGATGAACTGTTTATCCACCTTTATCAGCAAATATTGCACATAGAGGATCTTCAGTAGATTTAGCCATTTTTAGTTTACATTTGGCAGGAATTTCCTCAATTTTAGGAGCAGTAAACTTTATTTCAACAGTGATTAACATACGATCAACTGGAATTACATTTGATCGAATACCTCTATTCGTTTGAGCTGTAGTAATCACGGCTCTACTCCTCTTACTTTCATTACCTGTCCTTGCTGGAGCTATCACTATACTCCTAACTGACCGAAATCTAAACACTTCATTTTTTGACCCTGCAGGAGGAGGTGACCCAATTCTATACCAGCATTTATTT
>2588_Yukara_inornatus_Sakhalin_Russia
AACACTCTACTTCCTTTTTGGAGCATGAGCAGGAATATTAGGAACTTCATTAAGCCTATTAATTCGAGCAGAACTTGGTAACCCAGGGTCACTAATTGGGAATGACCAAATTTATAATGTTATTGTAACAGCCCACGCCTTTATCATAATTTTCTTTATAGTAATACCAATCATAATTGGAGGATTCGGTAATTGATTAGTACCTCTAATATTAGGAGCCCCAGATATAGCCTTCCCTCGAATAAACAACATGAGATTTTGATTTCTTCCTCCCTCTCTTTCCCTCCTTCTAATAAGAAGAATTGTAGAAAACGGAGCAGGAACAGGATGAACTGTTTATCCACCTTTATCAGCAAATATTGCACATAGAGGATCTTCAGTAGATTTAGCCATTTTTAGTTTACATTTGGCAGGAATTTCCTCAATTTTAGGAGCAGTAAACTTTATTTCAACAGTGATTAACATACGATCAACTGGAATTACATTTGATCGAATACCTCTATTCGTTTGAGCTGTAGTAATCACGGCTCTACTCCTCTTACTTTCATTACCTGTCCTTGCTGGAGCTATCACTATACTCCTAACTGATCGAAATCTAAACACTTCATTTTTTGACCCTGCAGGAGGAGGTGACCCAATTCTATACCAGCATTTATTT
>2590_Yukara_inornatus_Sakhalin_Russia
AACACTCTACTTCCTTTTTGGAGCATGAGCAGGAATATTAGGAACTTCGTTAAGCCTATTAATTCGAGCAGAACTTGGTAACCCAGGGTCACTAATTGGGAATGACCAAATTTATAATGTTATTGTAACAGCCCACGCCTTTATCATAATTTTCTTTATAGTAATACCAATCATAATTGGAGGATTCGGTAATTGATTAGTACCTCTAATATTAGGAGCCCCAGATATAGCCTTCCCTCGAATAAACAACATGAGATTTTGATTTCTTCCTCCCTCTCTTTCCCTCCTTCTAATAAGAAGAATTGTAGAAAACGGAGCAGGAACAGGATGAACTGTTTATCCACCTTTATCAGCAAATATTGCACATAGAGGATCTTCAGTAGATTTAGCCATTTTTAGTTTACATTTGGCAGGAATTTCCTCAATTTTAGGAGCAGTAAACTTTATTTCAACAGTGATTAACATACGATCAACTGGAATTACATTTGATCGAATACCTCTATTCGTTTGAGCTGTAGTAATCACGGCTCTACTCCTCTTACTTTCATTACCTGTCCTTGCTGGAGCTATCACTATACTCCTAACTGATCGAAATCTAAACACTTCATTTTTTGACCCTGCAGGAGGAGGTGACCCAATTCTATACCAGCATTTATTT
>2591_Yukara_inornatus_Sahkalin_Russia
AACACTCTACTTCCTTTTTGGAGCATGAGCAGGAATATTAGGAACTTCGTTAAGCCTATTAATTCGAGCAGAACTTGGTAACCCAGGGTCACTAATTGGGAATGACCAAATTTATAATGTTATTGTAACAGCCCACGCCTTTATCATAATTTTCTTTATAGTAATACCAATCATAATTGGAGGATTCGGTAATTGATTAGTACCTCTAATATTAGGAGCCCCAGATATAGCCTTCCCTCGAATAAACAACATGAGATTTTGATTTCTTCCTCCCTCTCTTTCCCTCCTTCTAATAAGAAGAATTGTAGAAAACGGAGCAGGAACAGGATGAACTGTTTATCCACCTTTATCAGCAAATATTGCACATAGAGGATCTTCAGTAGATTTAGCCATTTTTAGTTTACATTTGGCAGGAATTTCCTCAATTTTAGGAGCAGTAAACTTTATTTCAACAGTGATTAACATACGATCAACTGGAATTACATTTGATCGAATACCTCTATTCGTTTGAGCTGTAGTAATCACGGCTCTACTCCTCTTACTTTCATTACCTGTCCTTGCTGGAGCTATCACTATACTCCTAACTGACCGAAATCTAAACACTTCATTTTTTGACCCTGCAGGAGGAGGTGACCCAATTCTATACCAGCATTTATTT
>2592_Yukara_inornatus_Sahkalin_Russia
AACACTCTACTTCCTTTTTGGAGCATGAGCAGGAATATTAGGAACTTCGTTAAGCCTATTAATTCGAGCAGAACTTGGTAACCCAGGGTCACTAATTGGGAATGACCAAATTTATAATGTTATTGTAACAGCCCACGCCTTTATCATAATTTTCTTTATAGTAATACCAATCATAATTGGAGGATTCGGTAATTGATTAGTACCTCTAATATTAGGAGCCCCAGATATAGCCTTCCCTCGAATAAACAACATGAGATTTTGATTTCTTCCTCCCTCTCTTTCCCTCCTTCTAATAAGAAGAATTGTAGAAAACGGAGCAGGAACAGGATGAACTGTTTATCCACCTTTATCAGCAAATATTGCACATAGAGGATCTTCAGTAGATTTAGCCATTTTTAGTTTACATTTGGCAGGAATTTCCTCAATTTTAGGAGCAGTAAACTTTATTTCAACAGTGATTAACATACGATCAACTGGAATTACATTTGATCGAATACCTCTATTCGTTTGAGCTGTAGTAATCACGGCTCTACTCCTCTTACTTTCATTACCTGTCCTTGCTGGAGCTATCACTATACTCCTAACTGACCGAAATCTAAACACTTCATTTTTTGACCCTGCAGGAGGAGGTGACCCAATTCTATACCAGCATTTATTT
>2593_Yukara_inornatus_Sahkalin_Russia
AACACTCTACTTCCTTTTTGGAGCATGAGCAGGAATATTAGGAACTTCGTTAAGCCTATTAATTCGAGCAGAACTTGGTAACCCAGGGTCACTAATTGGGAATGACCAAATTTATAATGTTATTGTAACAGCCCACGCCTTTATCATAATTTTCTTTATAGTAATACCAATCATAATTGGAGGATTCGGTAATTGATTAGTACCTCTAATATTAGGAGCCCCAGATATAGCCTTCCCTCGAATAAACAACATGAGATTTTGATTTCTTCCTCCCTCTCTTTCCCTCCTTCTAATAAGAAGAATTGTAGAAAACGGAGCAGGAACAGGATGAACTGTTTATCCACCTTTATCAGCAAATATTGCACATAGAGGATCTTCAGTAGATTTAGCCATTTTTAGTTTACATTTGGCAGGAATTTCCTCAATTTTAGGAGCAGTAAACTTTATTTCAACAGTGATTAACATACGATCAACTGGAATTACATTTGATCGAATACCTCTATTCGTTTGAGCTGTAGTAATCACGGCTCTACTCCTCTTACTTTCATTACCTGTCCTTGCTGGAGCTATCACTATACTCCTAACTGACCGAAATCTAAACACTTCATTTTTTGACCCTGCAGGAGGAGGTGACCCAATTCTATACCAGCATTTATTT
>2594_Yukara_inornatus_Sahkalin_Russia
AACACTCTACTTCCTTTTTGGAGCATGAGCAGGAATATTAGGAACTTCGTTAAGCCTATTAATTCGAGCAGAACTTGGTAACCCAGGGTCACTAATTGGGAATGACCAAATTTATAATGTTATTGTAACAGCCCACGCCTTTATCATAATTTTCTTTATAGTAATACCAATCATAATTGGAGGATTCGGTAATTGATTAGTACCTCTAATATTAGGAGCCCCAGATATAGCCTTCCCTCGAATAAACAACATGAGATTTTGATTTCTTCCTCCCTCTCTTTCCCTCCTTCTAATAAGAAGAATTGTAGAAAACGGAGCAGGAACAGGATGAACTGTTTATCCACCTTTATCAGCAAATATTGCACATAGAGGATCTTCAGTAGATTTAGCCATTTTTAGTTTACATTTGGCAGGAATTTCCTCAATTTTAGGAGCAGTAAACTTTATTTCAACAGTGATTAACATACGATCAACTGGAATTACATTTGATCGAATACCTCTATTCGTTTGAGCTGTAGTAATCACGGCTCTACTCCTCTTACTTTCATTACCTGTCCTTGCTGGAGCTATCACTATACTCCTAACTGACCGAAATCTAAACACTTCATTTTTTGACCCTGCAGGAGGAGGTGACCCAATTCTATACCAGCATTTATTT
>2595_Yukara_inornatus_Sakhalin_Russia
AACACTCTACTTCCTTTTTGGAGCATGAGCAGGAATATTAGGAACTTCGTTAAGCCTATTAATTCGAGCAGAACTTGGTAACCCAGGGTCACTAATTGGGAATGACCAAATTTATAATGTTATTGTAACAGCCCACGCCTTTATCATAATTTTCTTTATAGTAATACCAATCATAATTGGAGGATTCGGTAATTGATTAGTACCTCTAATATTAGGAGCCCCAGATATAGCCTTCCCTCGAATAAACAACATGAGATTTTGATTTCTTCCTCCCTCTCTTTCCCTCCTTCTAATAAGAAGAATTGTAGAAAACGGAGCAGGAACAGGATGAACTGTTTATCCACCTTTATCAGCAAATATTGCACATAGAGGATCTTCAGTAGATTTAGCCATTTTTAGTTTACATTTGGCAGGAATTTCCTCAATTTTAGGAGCAGTAAACTTTATTTCAACAGTGATTAACATACGATCAACTGGAATTACATTTGATCGAATACCTCTATTCGTTTGAGCTGTAGTAATCACGGCTCTACTCCTCTTACTTTCATTACCTGTCCTTGCTGGAGCTATCACTATACTCCTAACTGACCGAAATCTAAACACTTCATTTTTTGACCCTGCAGGAGGAGGTGACCCAATTCTATACCAGCATTTATTT
>2597_Yukara_inornatus_Sakhalin_Russia
AACACTCTACTTCCTTTTTGGAGCATGAGCAGGAATATTAGGAACTTCGTTAAGCCTATTAATTCGAGCAGAACTTGGTAACCCAGGGTCACTAATTGGGAATGACCAAATTTATAATGTTATTGTAACAGCCCACGCCTTTATCATAATTTTCTTTATAGTAATACCAATCATAATTGGAGGATTCGGTAATTGATTAGTACCTCTAATATTAGGAGCCCCAGATATAGCCTTCCCTCGAATAAACAACATGAGATTTTGATTTCTTCCTCCCTCTCTTTCCCTCCTTCTAATAAGAAGAATTGTAGAAAACGGAGCAGGAACAGGATGAACTGTTTATCCACCTTTATCAGCAAATATTGCACATAGAGGATCTTCAGTAGATTTAGCCATTTTTAGTTTACATTTGGCAGGAATTTCCTCAATTTTAGGAGCAGTAAACTTTATTTCAACAGTGATTAACATACGATCAACTGGAATTACATTTGATCGAATACCTCTATTCGTTTGAGCTGTAGTAATCACGGCTCTACTCCTCTTACTTTCATTACCTGTCCTTGCTGGAGCTATCACTATACTCCTAACTGACCGAAATCTAAACACTTCATTTTTTGACCCTGCAGGAGGAGGTGACCCAATTCTATACCAGCATTTATTT
>2598_Yukara_inornatus_Sakhalin_Russia
AACACTCTACTTCCTTTTTGGAGCATGAGCAGGAATATTAGGAACTTCGTTAAGCCTATTAATTCGAGCAGAACTTGGTAACCCAGGGTCACTAATTGGGAATGACCAAATTTATAATGTTATTGTAACAGCCCACGCCTTTATCATAATTTTCTTTATAGTAATACCAATCATAATTGGAGGATTCGGTAATTGATTAGTACCTCTAATATTAGGAGCCCCAGATATAGCCTTCCCTCGAATAAACAACATGAGATTTTGATTTCTTCCTCCCTCTCTTTCCCTCCTTCTAATAAGAAGAATTGTAGAAAACGGAGCAGGAACAGGATGAACTGTTTATCCACCTTTATCAGCAAATATTGCACATAGAGGATCTTCAGTAGATTTAGCCATTTTTAGTTTACATTTGGCAGGAATTTCCTCAATTTTAGGAGCAGTAAACTTTATTTCAACAGTGATTAACATACGATCAACTGGAATTACATTTGATCGAATACCTCTATTCGTTTGAGCTGTAGTAATCACGGCTCTACTCCTCTTACTTTCATTACCTGTCCTTGCTGGAGCTATCACTATACTCCTAACTGACCGAAATCTAAACACTTCATTTTTTGACCCTGCAGGAGGAGGTGACCCAATTCTATACCAGCATTTATTT
>2599_Yukara_inornatus_Sakhalin_Russia
AACACTCTACTTCCTTTTTGGAGCATGAGCAGGAATATTAGGAACTTCGTTAAGCCTATTAATTCGAGCAGAACTTGGTAACCCAGGGTCACTAATTGGGAATGACCAAATTTATAATGTTATTGTAACAGCCCACGCCTTTATCATAATTTTCTTTATAGTAATACCAATCATAATTGGAGGATTCGGTAATTGATTAGTACCTCTAATATTAGGAGCCCCAGATATAGCCTTCCCTCGAATAAACAACATGAGATTTTGATTTCTTCCTCCCTCTCTTTCCCTCCTTCTAATAAGAAGAATTGTAGAAAACGGAGCAGGAACAGGATGAACTGTTTATCCACCTTTATCAGCAAATATTGCACATAGAGGATCTTCAGTAGATTTAGCCATTTTTAGTTTACATTTGGCAGGAATTTCCTCAATTTTAGGAGCAGTAAACTTTATTTCAACAGTGATTAACATACGATCAACTGGAATTACATTTGATCGAATACCTCTATTCGTTTGAGCTGTAGTAATCACGGCTCTACTCCTCTTACTTTCATTACCTGTCCTTGCTGGAGCTATCACTATACTCCTAACTGACCGAAATCTAAACACTTCATTTTTTGACCCTGCAGGAGGAGGTGACCCAATTCTATACCAGCATTTATTT
>2600_Yukara_inornatus_Sakhalin_Russia
AACACTCTACTTCCTTTTTGGAGCATGAGCAGGAATATTAGGAACTTCGTTAAGCCTATTAATTCGAGCAGAACTTGGTAACCCAGGGTCACTAATTGGGAATGACCAAATTTATAATGTTATTGTAACAGCCCACGCCTTTATCATAATTTTCTTTATAGTAATACCAATCATAATTGGAGGATTCGGTAATTGATTAGTACCTCTAATATTAGGAGCCCCAGATATAGCCTTCCCTCGAATAAACAACATGAGATTTTGATTTCTTCCTCCCTCTCTTTCCCTCCTTCTAATAAGAAGAATTGTAGAAAACGGAGCAGGAACAGGATGAACTGTTTATCCACCTTTATCAGCAAATATTGCACATAGAGGATCTTCAGTAGATTTAGCCATTTTTAGTTTACATTTGGCAGGAATTTCCTCAATTTTAGGAGCAGTAAACTTTATTTCAACAGTGATTAACATACGATCAACTGGAATTACATTTGATCGAATACCTCTATTCGTTTGAGCTGTAGTAATCACGGCTCTACTCCTCTTACTTTCATTACCTGTCCTTGCTGGAGCTATCACTATACTCCTAACTGACCGAAATCTAAACACTTCATTTTTTGACCCTGCAGGAGGAGGTGACCCAATTCTATACCAGCATTTATTT
>2601_Yukara_inornatus_Sakhalin_Russia
AACACTCTACTTCCTTTTTGGAGCATGAGCAGGAATATTAGGAACTTCGTTAAGCCTATTAATTCGAGCAGAACTTGGTAACCCAGGGTCACTAATTGGGAATGACCAAATTTATAATGTTATTGTAACAGCCCACGCCTTTATCATAATTTTCTTTATAGTAATACCAATCATAATTGGAGGATTCGGTAATTGATTAGTACCTCTAATATTAGGAGCCCCAGATATAGCCTTCCCTCGAATAAACAACATGAGATTTTGATTTCTTCCTCCCTCTCTTTCCCTCCTTCTAATAAGAAGAATTGTAGAAAACGGAGCAGGAACAGGATGAACTGTTTATCCACCTTTATCAGCAAATATTGCACATAGAGGATCTTCAGTAGATTTAGCCATTTTTAGTTTACATTTGGCAGGAATTTCCTCAATTTTAGGAGCAGTAAACTTTATTTCAACAGTGATTAACATACGATCAACTGGAATTACATTTGATCGAATACCTCTATTCGTTTGAGCTGTAGTAATCACGGCTCTACTCCTCTTACTTTCATTACCTGTCCTTGCTGGAGCTATCACTATACTCCTAACTGACCGAAATCTAAACACTTCATTTTTTGACCCTGCAGGAGGAGGTGACCCAATTCTATACCAGCATTTATTT
>2604_Yukara_inornatus_Sakhalin_Russia
AACACTCTACTTCCTTTTTGGAGCATGAGCAGGAATATTAGGAACTTCGTTAAGCCTATTAATTCGAGCAGAACTTGGTAACCCAGGGTCACTAATTGGGAATGACCAAATTTATAATGTTATTGTAACAGCCCACGCCTTTATCATAATTTTCTTTATAGTAATACCAATCATAATTGGAGGATTCGGTAATTGATTAGTACCTCTAATATTAGGAGCCCCAGATATAGCCTTCCCTCGAATAAACAACATGAGATTTTGATTTCTTCCTCCCTCTCTTTCCCTCCTTCTAATAAGAAGAATTGTAGAAAACGGAGCAGGAACAGGATGAACTGTTTATCCACCTTTATCAGCAAATATTGCACATAGAGGATCTTCAGTAGATTTAGCCATTTTTAGTTTACATTTGGCAGGAATTTCCTCAATTTTAGGAGCAGTAAACTTTATTTCAACAGTGATTAACATACGATCAACTGGAATTACATTTGATCGAATACCTCTATTCGTTTGAGCTGTAGTAATCACGGCTCTACTCCTCTTACTTTCATTACCTGTCCTTGCTGGAGCTATCACTATACTCCTAACTGACCGAAATCTAAACACTTCATTTTTTGACCCTGCAGGAGGAGGTGACCCAATTCTATACCAGCATTTATTT
>2605_Yukara_inornatus_Sakhalin_Russia
AACACTCTACTTCCTTTTTGGAGCATGAGCAGGAATATTAGGAACTTCGTTAAGCCTATTAATTCGAGCAGAACTTGGTAACCCAGGGTCACTAATTGGGAATGACCAAATTTACAATGTTATTGTAACAGCCCACGCCTTTATCATAATTTTCTTTATAGTAATACCAATCATAATTGGAGGATTCGGTAATTGATTAGTACCTCTAATATTAGGAGCCCCAGATATAGCCTTTCCTCGAATAAACAACATGAGATTCTGATTTCTTCCCCCCTCTCTTTCCCTCCTTCTAATAAGAAGAATTGTAGAAAACGGAGCAGGAACAGGATGAACTGTTTATCCACCTTTATCAGCAAATATTGCACATAGAGGATCTTCAGTAGATTTAGCCATTTTTAGTTTACATTTGGCAGGAATTTCCTCAATTTTAGGAGCTGTAAACTTTATTTCAACAGTGATTAATATACGATCAACTGGAATTACATTTGATCGAATACCTCTATTCGTTTGAGCTGTAGTAATCACGGCTCTACTCCTCTTACTTTCATTACCTGTCCTTGCTGGAGCTATCACTATACTCCTAACCGATCGAAATCTAAACACTTCATTTTTTGACCCTGCAGGAGGAGGTGACCCAATTCTATACCAACATTTATTT
>2568_Yukara_inornatus_Sakhalin_Russia
AACACTCTACTTCCTTTTTGGAGCATGAGCAGGAATATTAGGAACTTCGTTAAGCCTATTAATTCGAGCAGAACTTGGTAACCCAGGGTCACTAATTGGGAATGACCAAATTTATAATGTTATTGTAACAGCCCACGCCTTTATCATAATTTTCTTTATAGTAATACCAATCATAATTGGAGGATTCGGTAATTGATTAGTACCTCTAATATTAGGAGCCCCAGATATAGCCTTCCCTCGAATAAACAACATGAGATTTTGATTTCTTCCTCCCTCTCTTTCCCTCCTTCTAATAAGAAGAATTGTAGAAAACGGAGCAGGAACAGGATGAACTGTTTATCCACCTTTATCAGCAAATATTGCACATAGAGGATCTTCAGTAGATTTAGCCATTTTTAGTTTACATTTGGCAGGAATTTCCTCAATTTTAGGAGCAGTAAACTTTATTTCAACAGTGATTAACATACGATCAACTGGAATTACATTTGATCGAATACCTCTATTCGTTTGAGCTGTAGTAATCACGGCTCTACTCCTCTTACTTTCATTACCTGTCCTTGCTGGAGCTATCACTATACTCCTAACTGACCGAAATCTAAACACTTCATTTTTTGACCCTGCAGGAGGAGGTGACCCAATTCTATACCAGCATTTATTT
>2569_Yukara_inornatus_Sakhalin_Russia
AACACTCTACTTCCTTTTTGGAGCATGAGCAGGAaTATTAGGAACTTCGTTAAGCCTATTAATTCGAGCAGAACTTGGTAACCCAGGGTCACTAATTGGGAATGACCAAATTTATAATGTTATTGTAACAGCCCACGCCTTTATCATAATTTTCTTTATAGTAATACCAATCATAATTGGAGGATTCGGTAATTGATTAGTACCTCTAATATTAGGAGCCCCAGATATAGCCTTCCCTCGAATAAACAACATGAGATTTTGATTTCTTCCTCCCTCTCTTTCCCTCCTTCTAATAAGAAGAATTGTAGAAAACGGAGCAGGAACAGGATGAACTGTTTATCCACCTTTATCAGCAAATATTGCACATAGAGGATCTTCAGTAGATTTAGCCATTTTTAGTTTACATTTGGCAGGAATTTCCTCAATTTTAGGAGCAGTAAACTTTATTTCAACAGTGATTAACATACGATCAACTGGAATTACATTTGATCGAATACCTCTATTCGTTTGAGCTGTAGTAATCACGGCTCTACTCCTCTTACTTTCATTACCTGTCCTTGCTGGAGCTATCACTATACTCCTAACTGACCGAAATCTAAACACTTCATTTTTTGACCCTGCAGGAGGAGGTGACCCAATTCTATACCAGCATTTATTT
>2570_Yukara_inornatus_Sakhalin_Russia
AACACTCTACTTCCTTTTTGGAGCATGAGCAGGAATATTAGGAACTTCGTTAAGCCTATTAATTCGAGCAGAACTTGGTAACCCAGGGTCACTAATTGGGAATGACCAAATTTATAATGTTATTGTAACAGCCCACGCCTTTATCATAATTTTCTTTATAGTAATACCAATCATAATTGGAGGATTCGGTAATTGATTAGTACCTCTAATATTAGGAGCCCCAGATATAGCCTTCCCTCGAATAAACAACATGAGATTTTGATTTCTTCCTCCCTCTCTTTCCCTCCTTCTAATAAGAAGAATTGTAGAAAACGGAGCAGGAACAGGATGAACTGTTTATCCACCTTTATCAGCAAATATTGCACATAGAGGATCTTCAGTAGATTTAGCCATTTTTAGTTTACATTTGGCAGGAATTTCCTCAATTTTAGGAGCAGTAAACTTTATTTCAACAGTGATTAACATACGATCAACTGGAATTACATTTGATCGAATACCTCTATTCGTTTGAGCTGTAGTAATCACGGCTCTACTCCTCTTACTTTCATTACCTGTCCTTGCTGGAGCTATCACTATACTCCTAACTGAtCGAAATCTAAACACTTCATTTTTTGACCCTGCAGGAGGAGGTGACCCAATTCTATACCAGCATTTATTT
>1035_Denticollini_gen_and_sp_1_Mt_Gyebang_GW
AACTCTTTATTTTCTTTTTGGAGCCTGAGCAGGTATGCTAGGAACCTCTTTAAGACTGTTAATCCGAGCCGAATTAGGAAATCCTGGATCCCTAATTGGTAATGACCAAATTTACAACGTTATTGTCACAGCCCACGCTTTCATTATAATTTTCTTCATAGTTATACCAATTATAATTGGAGGATTCGGAAACTGACTAGTACCATTAATACTAGGGGCACCAGATATAGCATTTCCTCGAATAAACAATATAAGTTTTTGGTTTCTTCCTCCTTCTCTATCCCTCTTATTAATAAGAAGAATTGTTGAAAATGGAGCAGGAACAGGTTGAACAGTTTATCCACCTCTTTCAGCTAACATTGCCCATAGAGGTTCATCTGTAGATTTAGCAATTTTTAGTTTACACTTAGCTGGAATTTCCTCAATTTTAGGAGCTGTAAATTTTATTTCAACAGTAATTAATATGCGATCAACAGGAATTACATTTGATCGAATACCATTATTTGTATGAGCTGTAGTAATTACAGCCCTTCTCCTTCTCCTATCATTACCTGTTCTAGCGGGAGCAATCACTATGCTATTAACAGATCGAAATCTAAACACATCATTTTTTGACCCTGCAGGTGGAGGAGACCCAATTCTATACCAACATCTATTC
>3336_Denticollini_gen_and_sp_1_Mt_Jiri_GN
CACTCTTTATTTTCTTTTTGGAGCCTGAGCAGGTATGCTAGGAACCTCTTTAAGACTGTTAATCCGAGCCGAATTAGGAAATCCTGGATCCCTAATTGGTAATGACCAAATTTACAACGTTATTGTCACAGCCCACGCTTTCATTATAATTTTCTTCATAGTTATACCAATTATAATTGGAGGATTCGGAAACTGACTAGTACCATTAATACTAGGGGCACCAGATATAGCATTTCCTCGAATAAACAATATAAGTTTTTGGTTTCTTCCTCCTTCTCTATCCCTCTTATTAATAAGAAGAATTGTTGAAAATGGAGCAGGAACAGGTTGAACAGTTTATCCACCTCTTTCAGCTAACATTGCCCATAGAGGTTCATCTGTAGATTTAGCAATTTTTAGTTTACACTTAGCTGGAATTTCCTCAATTTTAGGAGCTGTAAATTTTATTTCAACAGTAATTAATATGCGATCAACAGGAATTACATTTGATCGAATACCATTATTTGTATGAGCTGTAGTAATTACAGCCCTTCTCCTTCTCCTATCATTACCTGTTTTAGCGGGAGCAATCACTATGCTATTAACAGATCGAAATCTAAACACATCATTTTTTGACCCTGCAGGTGGAGGAGACCCAATTCTATACCAACATCTATTC
>3337_Denticollini_gen_and_sp_1_Mt_Jiri_GN
CACTCTTTATTTTCTTTTTGGAGCCTGAGCAGGTATGCTAGGAACCTCTTTAAGACTGTTAATCCGAGCCGAATTAGGAAATCCTGGATCCCTAATTGGTAATGACCAAATTTACAACGTTATTGTCACAGCCCACGCTTTCATTATAATTTTCTTCATAGTTATACCAATTATAATTGGAGGATTCGGAAACTGACTAGTACCATTAATACTAGGGGCACCAGATATAGCATTTCCTCGAATAAACAATATAAGTTTTTGGTTTCTTCCTCCTTCTCTATCCCTCTTATTAATAAGAAGAATTGTTGAAAATGGAGCAGGAACAGGTTGAACAGTTTATCCACCTCTTTCAGCTAACATTGCCCATAGAGGTTCATCTGTAGATTTAGCAATTTTTAGTTTACACTTAGCTGGAATTTCCTCAATTTTAGGAGCTGTAAATTTTATTTCAACAGTAATTAATATGCGATCAACAGGAATTACATTTGATCGAATACCATTATTTGTATGAGCTGTAGTAATTACAGCCCTTCTCCTTCTCCTATCATTACCTGTTTTAGCGGGAGCAATCACTATGCTATTAACAGATCGAAATCTAAACACATCATTTTTTGACCCTGCAGGTGGAGGAGACCCAATTCTATACCAACATCTATTC
>3386_Denticollini_gen_and_sp_1_Bonghwa_GB
CACTCTTTATTTTCTTTTTGGAGCCTGAGCAGGTATGCTAGGAACCTCTTTAAGACTGTTAATCCGAGCCGAATTAGGAAATCCTGGATCCCTAATTGGTAATGACCAAATTTACAACGTTATTGTCACAGCCCACGCTTTCATTATAATTTTCTTCATAGTTATACCAATTATAATTGGAGGATTCGGAAACTGACTAGTACCATTAATACTAGGGGCACCAGATATAGCATTTCCTCGAATAAACAATATAAGTTTTTGGTTTCTTCCTCCTTCTCTATCCCTCTTATTAATAAGAAGAATTGTTGAAAATGGAGCAGGAACAGGTTGAACAGTTTATCCACCTCTTTCAGCTAACATTGCCCATAGAGGTTCATCTGTAGATTTAGCAATTTTTAGTTTACACTTAGCTGGAATTTCCTCAATTTTAGGAGCTGTAAATTTTATTTCAACAGTAATTAATATGCGATCAACAGGAATTACATTTGATCGAATACCATTATTTGTATGAGCTGTAGTAATTACAGCCCTTCTCCTTCTCCTATCATTACCTGTTCTAGCGGGAGCAATCACTATGCTATTAACAGATCGAAATCTAAACACATCATTTTTTGACCCTGCAGGTGGAGGAGACCCAATTCTATACCAACATCTATTC
>3392_Denticollini_gen_and_sp_1_Bonghwa_GB
----CTTTATTTTCTTTTTGGAGCCTGAGCAGGTATGCTAGGAACCTCTTTAAGACTGTTAATCCGAGCCGAATTAGGAAATCCTGGATCCCTAATTGGTAATGACCAAATTTACAACGTTATTGTCACAGCCCACGCTTTCATTATAATTTTCTTCATAGTTATACCAATTATAATTGGAGGATTCGGAAACTGACTAGTACCATTAATACTAGGGGCACCAGATATAGCATTTCCTCGAATAAACAATATAAGTTTTTGGTTTCTTCCTCCTTCTCTATCCCTCTTATTAATAAGAAGAATTGTTGAAAATGGAGCAGGAACAGGTTGAACAGTTTATCCACCTCTTTCAGCTAACATTGCCCATAGAGGTTCATCTGTAGATTTAGCAATTTTTAGTTTACACTTAGCTGGAATTTCCTCAATTTTAGGAGCTGTAAATTTTATTTCAACAGTAATTAATATGCGATCAACAGGAATTACATTTGATCGAATACCATTATTTGTATGAGCTGTAGTAATTACAGCCCTTCTCCTTCTCCTATCATTACCTGTTCTAGCGGGAGCAATCACTATGCTATTAACAGATCGAAATCTAAACACATCATTTTTTGACCCTGCAGGTGGAGGAGACCCAATTCTATACCAACATCTATTC
>3393_Denticollini_gen_and_sp_1_Bonghwa_GB
-ACTCTTTATTTTCTTTTTGGAGCCTGAGCAGGTATGCTAGGAACCTCTTTAAGACTGTTAATCCGAGCCGAATTAGGAAATCCTGGATCCCTAATTGGTAATGACCAAATTTACAACGTTATTGTCACAGCCCACGCTTTCATTATAATTTTCTTCATAGTTATACCAATTATAATTGGAGGATTCGGAAACTGACTAGTACCATTAATACTAGGGGCACCAGATATAGCATTTCCTCGAATAAACAATATAAGTTTTTGGTTTCTTCCTCCTTCTCTATCCCTCTTATTAATAAGAAGAATTGTTGAAAATGGAGCAGGAACAGGTTGAACAGTTTATCCACCTCTTTCAGCTAACATTGCCCATAGAGGTTCATCTGTAGATTTAGCAATTTTTAGTTTACACTTAGCTGGAATTTCCTCAATTTTAGGAGCTGTAAATTTTATTTCAACAGTAATTAATATGCGATCAACAGGAATTACATTTGATCGAATACCATTATTTGTATGAGCTGTAGTAATTACAGCCCTTCTCCTTCTCCTATCATTACCTGTTCTAGCGGGAGCAATCACTATGCTATTAACAGATCGAAATCTAAACACATCATTTTTTGACCCTGCAGGTGGAGGAGACCCAATTCTATACCAACATCTATTC
>3399_Denticollini_gen_and_sp_1_Bonghwa_GB
CACTCTTTATTTTCTTTTTGGAGCCTGAGCAGGTATGCTAGGAACCTCTTTAAGACTGTTAATCCGAGCCGAATTAGGAAATCCTGGATCCCTAATTGGTAATGACCAAATTTACAACGTTATTGTCACAGCCCACGCTTTCATTATAATTTTCTTCATAGTTATACCAATTATAATTGGAGGATTCGGAAACTGACTAGTACCATTAATACTAGGGGCACCAGATATAGCATTTCCTCGAATAAACAATATAAGTTTTTGGTTTCTTCCTCCTTCTCTATCCCTCTTATTAATAAGAAGAATTGTTGAAAATGGAGCAGGAACAGGTTGAACAGTTTATCCACCTCTTTCAGCTAACATTGCCCATAGAGGTTCATCTGTAGATTTAGCAATTTTTAGTTTACACTTAGCTGGAATTTCCTCAATTTTAGGAGCTGTAAATTTTATTTCAACAGTAATTAATATGCGATCAACAGGAATTACATTTGATCGAATACCATTATTTGTATGAGCTGTAGTAATTACAGCCCTTCTCCTTCTCCTATCATTACCTGTTCTAGCGGGAGCAATCACTATGCTATTAACAGATCGAAATCTAAACACATCATTTTTTGACCCTGCAGGTGGAGGAGACCCAATTCTATACCAACATCTATTC
>3400_Denticollini_gen_and_sp_1_Bonghwa_GB
CACTCTTTATTTTCTTTTTGGAGCCTGAGCAGGTATGCTAGGAACCTCTTTAAGACTGTTAATCCGAGCCGAATTAGGAAATCCTGGATCCCTAATTGGTAATGACCAAATTTACAACGTTATTGTCACAGCCCACGCTTTCATTATAATTTTCTTCATAGTTATACCAATTATAATTGGAGGATTCGGAAACTGACTAGTACCATTAATACTAGGGGCACCAGATATAGCATTTCCTCGAATAAACAATATAAGTTTTTGGTTTCTTCCTCCTTCTCTATCCCTCTTATTAATAAGAAGAATTGTTGAAAATGGAGCAGGAACAGGTTGAACAGTTTATCCACCTCTTTCAGCTAACATTGCCCATAGAGGTTCATCTGTAGATTTAGCAATTTTTAGTTTACACTTAGCTGGAATTTCCTCAATTTTAGGAGCTGTAAATTTTATTTCAACAGTAATTAATATGCGATCAACAGGAATTACATTTGATCGAATACCATTATTTGTATGAGCTGTAGTAATTACAGCCCTTCTCCTTCTCCTATCATTACCTGTTCTAGCGGGAGCAATCACTATGCTATTAACAGATCGAAATCTAAACACATCATTTTTTGACCCTGCAGGTGGAGGAGACCCAATTCTATACCAACATCTATTC
>3401_Denticollini_gen_and_sp_1_Bonghwa_GB
CACTCTTTATTTTCTTTTTGGAGCCTGAGCAGGTATGCTAGGAACCTCTTTAAGACTGTTAATCCGAGCCGAATTAGGAAATCCTGGATCCCTAATTGGTAATGACCAAATTTACAACGTTATTGTCACAGCCCACGCTTTCATTATAATTTTCTTCATAGTTATACCAATTATAATTGGAGGATTCGGAAACTGACTAGTACCATTAATACTAGGGGCACCAGATATAGCATTTCCTCGAATAAACAATATAAGTTTTTGGTTTCTTCCTCCTTCTCTATCCCTCTTATTAATAAGAAGAATTGTTGAAAATGGAGCAGGAACAGGTTGAACAGTTTATCCACCTCTTTCAGCTAACATTGCCCATAGAGGTTCATCTGTAGATTTAGCAATTTTTAGTTTACACTTAGCTGGAATTTCCTCAATTTTAGGAGCTGTAAATTTTATTTCAACAGTAATTAATATGCGATCAACAGGAATTACATTTGATCGAATACCATTATTTGTATGAGCTGTAGTAATTACAGCCCTTCTCCTTCTCCTATCATTACCTGTTCTAGCGGGAGCAATCACTATGCTATTAACAGATCGAAATCTAAACACATCATTTTTTGACCCTGCAGGTGGAGGAGACCCAATTCTATACCAACATCTATTC
>3424_Denticollini_gen_and_sp_1_Bonghwa_GB
CACTCTTTATTTTCTTTTTGGAGCCTGAGCAGGTATGCTAGGAACCTCTTTAAGACTGTTAATCCGAGCCGAATTAGGAAATCCTGGATCCCTAATTGGTAATGACCAAATTTACAACGTTATTGTCACAGCCCACGCTTTCATTATAATTTTCTTCATAGTTATACCAATTATAATTGGAGGATTCGGAAACTGACTAGTACCATTAATACTAGGGGCACCAGATATAGCATTTCCTCGAATAAACAATATAAGTTTTTGGTTTCTTCCTCCTTCTCTATCCCTCTTATTAATAAGAAGAATTGTTGAAAATGGAGCAGGAACAGGTTGAACAGTTTATCCACCTCTTTCAGCTAACATTGCCCATAGAGGTTCATCTGTAGATTTAGCAATTTTTAGTTTACACTTAGCTGGAATTTCCTCAATTTTAGGAGCTGTAAATTTTATTTCAACAGTAATTAATATGCGATCAACAGGAATTACATTTGATCGAATACCATTATTTGTATGAGCTGTAGTAATTACAGCCCTTCTCCTTCTCCTATCATTACCTGTTCTAGCGGGAGCAATCACTATGCTATTAACAGATCGAAATCTAAACACATCATTTTTTGACCCTGCAGGTGGAGGAGACCCAATTCTATACCAACATCTATTC
>2099_Scutellathous_porrecticollis_Yeongju_GB
AACCTTATACTTCCTATTCGGTGCATGAGCTGGAATACTAGGAACATCCTTAAGACTCCTAATTCGTGCAGAGCTTGGAAATCCTGGCTCACTGATTGGTAATGATCAAATCTACAATGTTATTGTAACAGCCCATGCTTTCATTATAATTTTCTTCATAGTTATACCAATTATAATTGGAGGATTCGGAAATTGATTAGTCCCCCTAATACTAGGAGCCCCAGATATAGCATTCCCACGAATAAACAATATAAGATTCTGATTTCTACCACCATCTCTATCACTTCTTCTAATAAGAAGAATTGTAGAAAATGGTGCAGGCACCGGATGAACGGTATACCCACCTTTATCAGCAAATATTGCCCACAGAGGATCCTCTGTAGATTTAGCTATTTTTAGACTTCATTTGGCAGGAATCTCCTCAATTTTAGGAGCCGTAAACTTCATTTCTACCGTAATCAATATACGATCAACTGGAATTACATTCGACCGAATACCTTTATTTGTATGGGCAGTAGCTATTACCGCCCTATTATTACTATTGTCCCTACCCGTTTTAGCAGGTGCCATCACAATACTTCTTACTGACCGAAACTTAAATACTTCATTCTTTGACCCTGCGGGGGGAGGGGACCCTATTCTTTACCAACATCTTTTC
>2100_Scutellathous_porrecticollis_Yeongju_GB
AACCTTATACTTCCTATTCGGTGCATGAGCTGGAATACTAGGAACATCCTTAAGACTCCTAATTCGTGCAGAGCTTGGAAATCCTGGCTCACTGATTGGTAATGATCAAATCTACAATGTTATTGTAACAGCCCATGCTTTCATTATAATTTTCTTCATAGTTATACCAATTATAATTGGAGGATTCGGAAATTGATTAGTCCCCCTAATACTAGGAGCCCCAGATATAGCATTCCCACGAATAAACAATATAAGATTCTGATTTCTACCACCATCTCTATCACTTCTTCTAATAAGAAGAATTGTAGAAAATGGTGCAGGCACCGGATGAACGGTATACCCACCTTTATCAGCAAATATTGCCCACAGAGGATCCTCTGTAGATTTAGCTATTTTTAGACTTCATTTGGCAGGAATCTCCTCAATTTTAGGAGCCGTAAACTTCATTTCTACCGTAATCAATATACGATCAACTGGAATTACATTCGACCGAATACCTTTATTTGTATGGGCAGTAGCTATTACCGCCCTATTATTACTATTGTCCCTACCCGTTTTAGCAGGTGCCATCACAATACTTCTTACTGACCGAAACTTAAATACTTCATTCTTTGACCCTGCGGGGGGAGGGGACCCTATTCTTTACCAACATCTTTTC
>2869_Scutelletathous_porrecticollis_Mt_Bukhan_GG
AACCTTATACTTCCTATTCGGTGCATGAGCTGGAATACTAGGAACATCCTTAAGACTCCTAATTCGTGCAGAGCTTGGAAATCCTGGCTCACTGATTGGTAATGATCAAATCTACAATGTTATTGTAACAGCCCATGCTTTCATTATAATTTTCTTCATAGTTATACCAATTATAATTGGAGGATTCGGAAATTGATTAGTCCCCCTAATACTAGGAGCCCCAGACATAGCATTCCCACGAATAAACAATATAAGATTCTGATTTCTACCACCATCCCTATCACTTCTTCTAATAAGAAGAATTGTAGAAAATGGTGCAGGCACCGGATGAACGGTATATCCACCTTTATCAGCAAATATTGCCCACAGAGGATCCTCTGTAGATTTAGCTATTTTTAGACTTCATTTGGCAGGAATCTCCTCAATTTTAGGAGCCGTAAACTTCATTTCTACCGTAATCAATATACGATCAACTGGAATTACATTTGACCGAATACCTTTATTTGTATGGGCAGTAGCTATTACCGCCCTATTATTACTATTGTCCCTACCCGTTTTAGCAGGTGCCATCACAATACTTCTTACTGACCGAAACTTAAATACTTCATTCTTTGACCCTGCGGGGGGAGGAGACCCTATTCTTTACCAACATCTTTTC
>3331_Scutellathous_porrecticollis_Mt_Jiri_Sancheong_GN
AACCTTATACTTCCTATTCGGTGCATGAGCTGGAATACTAGGAACATCCTTAAGACTCCTAATTCGTGCAGAGCTTGGAAATCCTGGCTCACTGATTGGTAACGATCAAATCTACAATGTTATTGTAACAGCCCATGCTTTCATTATAATTTTCTTCATAGTTATACCAATTATAATTGGAGGATTCGGAAATTGATTAGTCCCCCTAATACTAGGAGCCCCAGATATAGCATTCCCACGAATAAATAATATAAGATTCTGATTTCTACCACCATCTCTATCACTTCTTCTAATAAGAAGAATTGTAGAAAATGGTGCAGGCACCGGATGAACGGTATATCCACCTTTATCAGCAAATATTGCCCACAGAGGATCCTCTGTAGATTTAGCTATTTTTAGACTTCATTTGGCAGGAATCTCCTCAATTTTAGGGGCCGTAAACTTCATTTCTACCGTAATCAATATACGATCAACTGGAATTACATTCGACCGAATACCTTTATTTGTATGGGCAGTGGCTATTACCGCCCTATTATTACTATTGTCCCTACCCGTTTTAGCAGGTGCCATCACAATACTTCTTACTGACCGAAACTTAAATACTTCATTCTTTGACCCTGCGGGGGGAGGAGACCCTATTCTTTACCAACATCTTTTC
>3332_Scutellathous_porrecticollis_Mt_Jiri_Hamyang_GN
AACCTTATACTTCCTATTCGGTGCATGAGCTGGAATACTAGGAACATCCTTAAGACTCCTAATTCGTGCAGAGCTTGGAAATCCTGGCTCACTGATTGGTAACGATCAAATCTACAATGTTATTGTAACAGCCCATGCTTTCATTATAATTTTCTTCATAGTTATACCAATTATAATTGGAGGATTCGGAAATTGATTAGTCCCCCTAATACTAGGAGCCCCAGATATAGCATTCCCACGAATAAATAATATAAGATTCTGATTTCTACCACCATCTCTATCACTTCTTCTAATAAGAAGAATTGTAGAAAATGGTGCAGGCACCGGATGAACGGTATATCCACCTTTATCAGCAAATATTGCCCACAGAGGATCCTCTGTAGATTTAGCTATTTTTAGACTTCATTTGGCAGGAATCTCCTCAATTTTAGGAGCCGTAAACTTCATTTCTACCGTAATCAATATACGATCAACTGGAATTACATTCGACCGAATACCTTTATTTGTATGGGCAGTAGCTATTACCGCCCTATTATTACTATTGTCCCTACCCGTTTTAGCAGGTGCCATCACAATACTTCTTACTGACCGAAACTTAAATACTTCATTCTTTGACCCTGCGGGGGGAGGAGACCCTATTCTTTACCAACATCTTTTC
>3333_Scutellathous_porrecticollis_Mt_Jiri_Sancheong_GN
AACCTTATACTTCCTATTCGGTGCATGAGCTGGAATACTAGGAACATCCTTAAGACTCCTAATTCGTGCAGAGCTTGGAAATCCTGGCTCACTGATTGGTAACGATCAAATCTACAATGTTATTGTAACAGCCCATGCTTTCATTATAATTTTCTTCATAGTTATACCAATTATAATTGGAGGATTCGGAAATTGATTAGTCCCCCTAATACTAGGAGCCCCAGATATAGCATTCCCACGAATAAATAATATAAGATTCTGATTTCTACCACCATCTCTATCACTTCTTCTAATAAGAAGAATTGTAGAAAATGGTGCAGGCACCGGATGAACGGTATATCCACCTTTATCAGCAAATATTGCCCACAGAGGATCCTCTGTAGATTTAGCTATTTTTAGACTTCATTTGGCAGGAATCTCCTCAATTTTAGGAGCCGTAAACTTCATTTCTACCGTAATCAATATACGATCAACTGGAATTACATTCGACCGAATACCTTTATTTGTATGGGCAGTGGCTATTACCGCCCTATTATTACTATTGTCCCTACCCGTTTTAGCAGGTGCCATCACAATACTTCTTACTGACCGAAACTTAAATACTTCATTCTTTGACCCTGCGGGGGGAGGAGACCCTATTCTTTACCAACATCTTTTC
>3335_Scutellathous_porrecticollis_Mt_Jiri_Gurae_JN
AACCTTATACTTCCTATTCGGTGCATGAGCTGGAATACTAGGAACATCCTTAAGACTCCTAATTCGTGCAGAGCTTGGAAATCCTGGCTCACTGATTGGTAACGATCAAATCTACAATGTTATTGTAACAGCCCATGCTTTCATTATAATTTTCTTCATAGTTATACCAATTATAATTGGAGGATTCGGAAATTGATTAGTCCCCCTAATACTAGGAGCCCCAGATATAGCATTCCCACGAATAAACAATATAAGATTCTGATTTCTACCACCATCTCTATCACTTCTTCTAATAAGAAGAATTGTAGAAAATGGTGCAGGCACCGGATGAACGGTATATCCACCTTTATCAGCAAATATTGCCCACAGAGGATCCTCTGTAGATTTAGCTATTTTTAGACTTCATTTGGCAGGAATCTCCTCAATTTTAGGAGCCGTAAACTTCATTTCTACCGTAATCAATATACGATCAACTGGAATTACATTCGACCGAATACCTTTATTTGTATGGGCAGTAGCTATTACCGCCCTATTATTACTATTGTCCCTACCCGTTTTAGCAGGTGCCATCACAATACTTCTTACTGACCGAAACTTAAATACTTCATTCTTTGACCCTGCGGGGGGAGGAGACCCTATTCTTTACCAACATCTTTTC
>3334_Scutellathous_porrecticollis_Mt_Jiri_Sangcheong_GN
AACCTTATACTTCCTATTCGGTGCATGAGCTGGAATACTAGGAACATCCTTAAGACTCCTAATTCGTGCAGAGCTTGGAAATCCTGGCTCACTGATTGGTAACGATCAAATCTACAATGTTATTGTAACAGCCCATGCTTTCATTATAATTTTCTTCATAGTTATACCAATTATAATTGGAGGATTCGGAAATTGATTAGTCCCCCTAATACTAGGAGCCCCAGATATAGCATTCCCACGAATAAACAATATAAGATTCTGATTTCTACCACCATCCCTATCACTTCTTCTAATAAGAAGAATTGTAGAAAATGGTGCAGGCACCGGATGAACAGTGTATCCACCTTTATCAGCAAATATTGCCCACAGAGGATCCTCTGTAGATTTAGCTATTTTTAGACTTCATTTGGCAGGAATCTCCTCAATTTTAGGCGCCGTAAACTTCATTTCTACCGTAATCAATATACGATCAACTGGAATTACATTCGACCGAATACCTTTATTTGTATGGGCAGTAGCTATTACCGCCCTATTATTATTATTGTCCCTACCCGTTCTAGCAGGTGCCATCACAATACTTCTTACTGACCGAAACTTAAATACTTCATTCTTTGACCCTGCGGGAGGAGGGGACCCTATTCTTTATCAACATCTTTTC
>3385_Scutellathous_porrecticollis_Bonghwa_GB
TACCTTATACTTCCTATTCGGTGCATGAGCTGGAATACTAGGAACATCCTTAAGACTCCTAATTCGTGCAGAGCTTGGGAATCCTGGCTCACTGATTGGTAATGATCAAATCTACAATGTTATTGTAACAGCCCATGCTTTCATTATAATTTTCTTCATAGTTATACCAATTATAATTGGAGGATTCGGAAATTGATTAGTCCCCCTAATACTAGGAGCCCCAGACATAGCATTCCCACGAATAAACAATATAAGATTCTGATTTCTACCACCATCCCTATCACTTCTTCTAATAAGAAGAATTGTAGAAAATGGCGCAGGCACCGGATGAACAGTATATCCACCTTTATCAGCAAATATTGCCCACAGAGGATCCTCTGTAGATTTAGCTATTTTTAGACTTCATTTGGCAGGAATCTCCTCAATTTTAGGCGCCGTAAACTTCATTTCTACCGTAATCAATATACGATCAACTGGAATTACATTCGACCGAATGCCTTTATTTGTGTGAGCAGTAGCTATTACCGCCCTATTATTATTATTGTCCCTACCCGTTCTAGCAGGTGCCATCACAATACTTCTTACTGACCGAAACTTAAATACTTCATTCTTTGACCCTGCGGGGGGAGGAGACCCTATTCTTTACCAACATCTTTTC
>3394_Scutellathous_porrecticollis_Bonghwa_GB
----TTATACTTCCTATTCGGTGCATGAGCTGGAATACTAGGAACATCCTTAAGACTCCTAATTCGTGCAGAGCTTGGAAATCCTGGCTCACTGATTGGTAATGATCAAATCTACAATGTTATTGTAACAGCCCATGCTTTCATTATAATTTTCTTCATAGTTATACCAATTATAATTGGAGGATTCGGAAATTGATTAGTCCCCCTAATACTAGGAGCCCCAGATATAGCATTCCCACGAATAAACAATATAAGATTCTGATTTCTACCACCATCTCTATCACTTCTTCTAATAAGAAGAATTGTAGAAAATGGTGCAGGCACCGGATGAACGGTATACCCACCTTTATCAGCAAATATTGCCCACAGAGGATCCTCTGTAGATTTAGCTATTTTTAGACTTCATTTGGCAGGAATCTCCTCAATTTTAGGAGCCGTAAACTTCATTTCTACCGTAATCAATATACGATCAACTGGAATTACATTCGACCGAATACCTTTATTTGTATGGGCAGTAGCTATTACCGCCCTATTATTACTATTGTCCCTACCCGTTTTAGCAGGTGCCATCACAATACTTCTTACTGACCGAAACTTAAATACTTCATTCTTTGACCCTGCGGGGGGAGGGGACCCTATTCTTTACCAACATCTTTTC
>3083_Scutellathous_comes_Ibaraki_Honshu_Japan
AACTTTATACTTTCTCTTCGGAGCATGGGCCGGAATACTAGGAACATCCCTAAGTCTCTTAATTCGTGCTGAGCTTGGAAATCCAGGCTCACTTATTGGTAATGATCAAATCTACAATGTCATTGTAACAGCCCACGCCTTCATTATAATCTTCTTTATAGTAATACCCATTATAATTGGTGGTTTCGGAAACTGATTAGTCCCCCTAATACTAGGAGCCCCAGATATAGCATTCCCACGAATGAACAATATAAGATTCTGGTTTCTTCCTCCCTCCCTCTCTCTTCTCTTAATAAGAAGAATTGTAGAAAATGGGGCAGGAACAGGATGAACTGTATACCCACCGCTATCTGCCAACATTGCCCACAGAGGATCCTCTGTAGACCTAGCAATTTTTAGGCTACATTTAGCAGGAATTTCCTCCATTCTAGGAGCCGTAAACTTTATCTCTACCGTAATTAATATACGATCTACAGGAATCACGTTTGATCGAATACCTTTATTTGTTTGAGCAGTAGCCATTACTGCCCTTCTATTACTTTTATCCCTACCAGTTCTAGCAGGCGCTATTACAATACTTCTCACTGATCGTAACTTAAATACCTCATTTTTCGACCCTGCCGGGGGAGGAGACCCAATCCTATACCAGCATCTGTTT
>3088_Scutellathous_spec_ozaki_Honshu_Japan
AACTTTGTACTTTCTCTTCGGAGCATGAGCCGGAATACTAGGGACATCCCTAAGACTCTTAATTCGTGCTGAGCTTGGAAATCCGGGCTCATTAATTGGCAATGATCAAATCTACAATGTTATTGTAACAGCCCACGCCTTCATTATAATTTTCTTCATAGTTATGCCTATCATAATTGGCGGTTTCGGAAACTGACTAGTACCCCTAATACTTGGAGCTCCAGATATAGCATTCCCACGAATAAACAATATAAGATTCTGATTTCTACCTCCCTCTCTGTCTCTTCTCTTGATAAGAAGAATTGTAGAAAATGGAGCAGGAACTGGTTGAACTGTTTATCCACCTCTATCTGCCAATATTGCCCATAGAGGATCCTCAGTAGATTTGGCAATTTTCAGACTCCATTTAGCAGGAATCTCCTCAATTTTAGGAGCTGTAAACTTTATTTCTACCGTAATTAATATGCGATCCACAGGAATCACGTTTGATCGAATACCTTTATTTGTTTGAGCAGTAGCCATCACTGCTCTATTATTACTTCTATCATTACCAGTTCTAGCTGGTGCTATTACTATACTTCTCACTGATCGAAACCTTAATACTTCATTTTTTGATCCTGCTGGAGGAGGAGACCCTATCTTATACCAACACCTTTTC
>3255_Ohirathous_nantouensis_Taiwan
--------------------------GAGCAGGAATACTAGGAACATCTCTTAGTCTTCTAATTCGAGCCGAATTAGGTAGTCCTGGATCTTTAATTGGTAACGACCAAATTTACAATGTAATTGTTACAGCACACGCTTTCATTATAATTTTCTTCATAGTAATACCTATCATAATTGGAGGATTCGGAAATTGATTAGTACCCTTAATGTTAGGAGCTCCTGATATAGCATTCCCCCGAATAAACAATATAAGATTCTGATTTTTACCACCCTCATTGTCCCTCCTCCTAATAAGAAGAATTGTAGAAAACGGTGCAGGAACTGGATGAACTGTTTATCCCCCTCTCTCCGCAAATATTGCCCATAGAGGATCATCTGTAGATTTAGCAATTTTTAGCTTACATCTAGCAGGAATCTCCTCAATCCTAGGAGCTGTAAATTTTATTTCCACAGTAATCAACATACGATCAGCAGGAATTACATTTGATCGAATACCTCTTTTTGTATGAGCAGTAGCTATCACAGCACTATTACTTCTTTTATCTTTACCAGTATTAGCAGGAGCTATTACTATATTATTAACAGACCGAAATCTTAATACATCCTTCTTTGACCCCGCTGGAGGAGGAGACCCTATTCTGTATCAACATCTATTC
>2351_Megathous_dauricus_Bornuur_Molgolia
AACTCTCTACTTCCTTTTTGGAGCATGAGCAGGAATGCTAGGAACTTCATTAAGCCTATTAATTCGAGCAGAACTTGGTAACCCTGGTTCACTTATTGGAAATGACCAAATCTATAATGTCATTGTAACAGCTCATGCTTTTATCATAATTTTCTTTATAGTTATACCAATTATAATTGGAGGATTTGGAAATTGATTAGTTCCCCTAATACTAGGGGCCCCAGATATAGCTTTCCCACGAATAAATAACATAAGATTCTGGTTCCTACCTCCTTCTCTTTCCCTCTTATTAATAAGAAGTATTGTTGAAAACGGTGCAGGGACAGGATGAACTGTATACCCTCCACTATCAGCAAATATTGCCCATAGTGGATCCTCAGTAGACCTTGCTATTTTCAGGTTACACCTAGCAGGAATTTCATCAATTCTAGGAGCAGTAAATTTTATTTCTACAGTAATTAATATACGATCAACTGGAATTACATTTGACCGAATGCCTCTATTTGTGTGAGCTGTTGTTATTACTGCTCTTCTTTTATTACTTTCTCTTCCTGTCCTTGCAGGAGCAATCACTATACTTTTAACAGATCGAAATTTAAACACCTCCTTCTTTGACCCTGCAGGTGGAGGAGACCCTATTCTATACCAACATTTATTT
>2655_Diacanthous_undulatus_Mt_Odae_GW
AACTCTATACTTCCTATTTGGAGCATGAGCTGGAATATTAGGAACATCACTAAGATTACTAATTCGTGCCGAACTCGGAAACCCCGGATCACTAATCGGGAATGATCAAATTTATAACGTAATTGTAACAGCCCATGCTTTCATCATAATTTTCTTCATAGTAATACCAATTATAATTGGAGGATTCGGAAATTGACTAGTACCTCTAATATTAGGGGCACCAGATATAGCCTTCCCACGAATAAATAACATAAGATTTTGATTCCTTCCACCTTCATTATCACTACTATTAATAAGAAGAATTGTAGAAAATGGGGCAGGTACAGGCTGAACAGTATACCCACCTCTCTCAGCAAATATTGCACATAGAGGCTCATCCGTAGATTTAGCAATTTTTAGACTACACCTAGCAGGAATTTCATCAATTCTAGGAGCAGTAAACTTCATCTCAACTGTAATTAATATACGATCAACCGGGATCACGTTCGACCGTATACCCTTATTTGTATGAGCTGTTGCAATCACCGCTTTACTACTTCTTCTATCCCTGCCAGTACTAGCAGGAGCAATTACAATACTATTAACTGACCGAAATCTAAATACATCATTCTTTGACCCTGCAGGAGGAGGTGACCCAATTCTTTATCAGCACCTATTC
>2656_Diacanthous_undulatus_Mt_Odae_GW
AACTTTATACTTCCTATTTGGAGCATGAGCTGGAATATTAGGAACATCACTAAGATTACTAATTCGTGCCGAACTCGGAAACCCCGGATCACTAATCGGGAATGATCAAATTTATAACGTAATTGTAACAGCCCATGCTTTCATCATAATTTTCTTCATAGTAATACCAATTATAATTGGAGGATTCGGAAATTGACTAGTACCTCTAATATTAGGAGCACCAGATATAGCCTTCCCACGAATAAATAACATAAGATTTTGATTCCTTCCACCTTCATTATCACTACTATTAATAAGAAGAATTGTAGAAAATGGAGCAGGTACAGGCTGAACAGTATACCCACCTCTCTCAGCAAATATTGCACATAGAGGCTCATCCGTAGATTTAGCAATTTTTAGACTACACCTAGCAGGAATTTCATCAATTCTAGGAGCAGTAAACTTCATCTCAACTGTAATTAATATACGATCAACCGGGATCACGTTCGACCGTATACCCTTATTTGTATGAGCTGTTGCAATCACCGCTTTACTACTTCTTCTATCCCTGCCAGTACTAGCAGGAGCAATTACAATACTATTAACTGACCGAAATCTAAATACATCATTCTTTGACCCTGCAGGAGGAGGTGACCCAATTCTTTATCAACACCTATTC
>3305_Diacanthous_undulatus_Mt_Odae_GW
AACTCTATACTTCCTATTTGGAGCATGAGCTGGAATATTAGGAACATCACTAAGATTACTAATTCGTGCCGAACTCGGAAACCCCGGATCACTAATCGGGAATGATCAAATTTATAACGTAATTGTAACAGCCCATGCTTTCATCATAATTTTCTTCATAGTAATACCAATTATAATTGGAGGATTCGGAAATTGACTAGTACCTCTAATGTTAGGAGCACCAGATATAGCCTTCCCACGAATAAATAACATAAGATTTTGATTCCTTCCACCTTCATTATCACTACTATTAATAAGAAGAATTGTAGAAAATGGGGCAGGTACAGGCTGAACAGTATATCCACCTCTCTCAGCAAATATTGCACATAGAGGCTCATCCGTAGATTTAGCAATTTTTAGACTACACCTAGCAGGAATTTCATCAATTCTAGGAGCAGTAAACTTCATCTCAACTGTAATTAATATACGATCAACCGGGATCACGTTCGACCGTATACCCTTATTTGTATGAGCTGTTGCAATCACCGCTTTATTACTTCTTCTATCCCTGCCAGTACTAGCAGGAGCAATTACAATACTATTAACTGACCGAAATCTAAATACATCATTCTTTGACCCTGCAGGAGGAGGTGACCCAATTCTTTATCAACACCTATTC
>2657_Stenagostus_sp_1_JJ
AACACTCTATTTCTTATTCGGGGCCTGAGCAGGCATACTAGGAACTTCTCTAAGACTATTAATCCGAGCAGAACTAGGAAATCCTGGTTCACTAATCGGAAATGACCAAATCTACAACGTTATTGTTACAGCACACGCATTCATCATAATTTTTTTTATAGTAATACCAATCATAATTGGAGGATTCGGAAACTGACTAGTACCTCTTATATTAGGAGCCCCTGATATAGCATTCCCCCGAATAAATAATATAAGATTCTGATTTTTACCACCCTCGCTGTCACTTCTTCTAATAAGAAGAATTGTTGAAAACGGAGCAGGGACAGGATGAACAGTTTATCCACCACTATCTGCCAATATCGCCCACAGAGGCTCCTCAGTAGACCTAGCAATTTTCAGACTTCACCTAGCAGGAATTTCCTCGATTCTAGGAGCAGTAAACTTCATTTCAACAGTAATTAATATACGATCAACTGGAATCACCTTTGACCGAATACCCCTATTTGTGTGAGCAGTAGCTATTACAGCACTGCTTCTTCTTTTATCCCTACCTGTACTGGCCGGAGCAATCACAATACTACTAACAGACCGTAATCTAAATACATCTTTCTTCGATCCCGCTGGTGGGGGAGACCCAATTCTATACCAACACTTGTTC
>3620_Stenagostus_sp_1_JJ
AACACTCTATTTCTTATTCGGGGCCTGAGCAGGCATACTAGGAACTTCTCTAAGACTATTAATCCGAGCAGAACTAGGAAATCCTGGTTCACTAATCGGAAATGACCAAATCTACAACGTTATTGTTACAGCACACGCATTCATCATAATTTTTTTTATAGTAATACCAATCATAATTGGAGGATTCGGAAACTGACTAGTACCTCTTATATTAGGAGCCCCTGATATAGCATTCCCCCGAATAAATAATATAAGATTCTGATTTTTACCACCCTCGCTGTCACTTCTTCTAATAAGAAGAATTGTTGAAAACGGAGCAGGGACAGGATGAACAGTTTATCCACCACTATCTGCCAATATCGCCCACAGAGGCTCCTCAGTAGACCTAGCAATTTTCAGACTTCACCTAGCAGGAATTTCCTCGATTCTAGGAGCAGTAAACTTCATTTCAACAGTAATTAATATACGATCAACTGGAATCACCTTTGACCGAATACCCCTATTTGTGTGAGCAGTAGCTATTACAGCACTGCTTCTTCTTTTATCCCTACCTGTACTGGCCGGAGCAATCACAATACTACTAACAGACCGTAATCTAAATACATCTTTCTTCGATCCCGCTGGTGGGGGAGACCCAATTCTATACCAACACTTGTTC
>3621_Stenagostus_sp_1_JJ
AACACTCTATTTCTTATTCGGGGCCTGAGCAGGCATACTAGGAACTTCTCTAAGACTATTAATCCGAGCAGAACTAGGAAATCCTGGTTCACTAATCGGAAATGACCAAATCTACAACGTTATTGTTACAGCACACGCATTCATCATAATTTTTTTTATAGTAATACCAATCATAATTGGAGGATTCGGAAACTGACTAGTACCTCTTATATTAGGAGCCCCTGATATAGCATTCCCCCGAATAAATAATATAAGATTCTGATTTTTACCACCCTCGCTGTCACTTCTTCTAATAAGAAGAATTGTTGAAAACGGAGCAGGGACAGGATGAACAGTTTATCCACCACTATCTGCCAATATCGCCCACAGAGGCTCCTCAGTAGACCTAGCAATTTTCAGACTTCACCTAGCAGGAATTTCCTCGATTCTAGGAGCAGTAAACTTCATTTCAACAGTAATTAATATACGATCAACTGGAATCACCTTTGACCGAATACCCCTATTTGTGTGAGCAGTAGCTATTACAGCACTGCTTCTTCTTTTATCCCTACCTGTACTGGCCGGAGCAATCACAATACTACTAACAGACCGTAATCTAAATACATCTTTCTTCGATCCCGCTGGTGGGGGAGACCCAATTCTATACCAACACTTGTTC
>3066_Stenagostus_umbratilis_Ibaraki_Honshu_Japan
AACACTCTACTTTTTATTCGGGGCCTGGGCCGGAATACTGGGAACTTCACTAAGACTCCTAATCCGAGCAGAACTGGGCAATCCCGGATCTTTAATCGGAAACGACCAAATCTATAACGTCATTGTAACAGCACACGCTTTCATCATAATTTTCTTCATAGTAATACCAATCATAATTGGGGGTTTCGGAAACTGATTAGTGCCCCTAATACTGGGGGCCCCTGACATAGCATTCCCACGAATAAATAATATAAGATTTTGGTTTTTACCACCTTCACTATCACTTCTATTAATAAGAAGAATTGTTGAAAACGGGGCAGGAACAGGATGAACCGTCTACCCGCCCCTATCTGCCAACATCGCTCACAGAGGTTCATCAGTAGACCTAGCAATTTTTAGTCTTCACCTGGCCGGAATCTCATCAATCCTGGGAGCAGTAAACTTTATCTCAACAGTAATTAATATACGATCAACAGGAATTACCTTTGATCGAATACCACTCTTCGTCTGGGCAGTAGCTATTACAGCCCTACTTCTTCTGCTATCACTTCCTGTATTGGCAGGAGCAATCACCATACTATTAACAGATCGTAATTTAAACACATCATTCTTTGACCCAGCAGGAGGTGGAGACCCAATTTTGTACCAACACTTATTC
>3067_Stenagostus_umbratilis_Ibaraki_Honshu_Japan
AACACTCTACTTTTTATTCGGGGCCTGGGCCGGAATACTGGGAACTTCACTAAGACTCCTAATCCGAGCAGAACTGGGCAATCCCGGATCTTTAATCGGAAACGACCAAATCTATAACGTCATTGTAACAGCACACGCTTTCATCATAATTTTCTTCATAGTAATACCAATCATAATTGGGGGTTTCGGAAACTGATTAGTGCCCCTAATACTGGGGGCCCCTGACATAGCATTCCCACGAATAAATAATATAAGATTTTGGTTTTTACCACCTTCACTATCACTTCTATTAATAAGAAGAATTGTTGAAAACGGGGCAGGAACAGGATGAACCGTCTACCCACCCCTATCTGCCAACATCGCTCACAGAGGTTCATCAGTAGACCTAGCAATTTTTAGTCTTCACCTGGCCGGAATCTCATCAATCCTGGGAGCAGTAAACTTTATCTCAACAGTAATTAATATACGATCAACAGGAATTACCTTTGATCGAATACCACTCTTCGTCTGGGCAGTAGCTATTACAGCCCTACTTCTTCTGCTATCACTTCCTGTATTGGCAGGAGCAATCACCATACTATTAACAGATCGTAATTTAAACACATCATTCTTTGACCCAGCAGGAGGTGGAGACCCAATTTTGTACCAACACTTATTC
>3068_Stenagostus_umbratilis_Ibaraki_Honshu_Japan
AACACTCTACTTTTTATTCGGGGCCTGGGCCGGAATACTGGGAACTTCACTAAGACTCCTAATCCGAGCAGAACTGGGCAATCCCGGATCTTTAATCGGAAACGACCAAATCTATAACGTCATTGTAACAGCACACGCTTTCATCATAATTTTCTTCATAGTAATACCAATCATAATTGGGGGTTTCGGAAACTGATTAGTGCCCCTAATACTGGGGGCCCCTGACATAGCATTCCCACGAATAAATAATATAAGATTTTGGTTTTTACCGCCTTCACTATCACTTCTATTAATAAGAAGAATTGTTGAAAACGGGGCAGGAACAGGATGAACCGTCTACCCGCCCCTATCTGCCAACATCGCTCACAGAGGTTCATCAGTAGACCTAGCAATTTTTAGTCTTCACCTGGCCGGAATCTCATCAATCCTGGGAGCAGTAAACTTTATCTCAACAGTAATTAATATACGATCAACAGGAATTACCTTTGATCGAATACCACTCTTCGTCTGGGCAGTAGCTATTACAGCCCTACTTCTTCTGCTATCACTTCCTGTATTGGCAGGAGCAATCACCATACTATTAACAGATCGTAATTTAAACACATCATTCTTTGACCCAGCAGGAGGTGGAGACCCAATTTTGTACCAACACTTATTC
>3069_Stenagostus_umbratilis_Ibaraki_Honshu_Japan
AACACTCTACTTTTTATTCGGGGCCTGGGCCGGAATACTAGGAACTTCACTAAGACTCCTAATCCGAGCAGAACTGGGCAATCCCGGATCTTTAATCGGAAACGACCAAATCTATAACGTCATTGTAACAGCACACGCTTTCATCATAATTTTCTTCATAGTAATACCAATCATAATTGGGGGTTTCGGAAACTGATTAGTGCCCCTAATACTGGGGGCCCCTGACATAGCATTCCCACGAATAAATAATATAAGATTTTGGTTTTTACCACCTTCACTATCACTTCTATTAATAAGAAGAATTGTTGAAAACGGGGCAGGAACAGGATGAACTGTCTACCCGCCCCTATCTGCCAACATCGCTCACAGAGGTTCATCAGTAGACCTAGCAATTTTTAGTCTTCACCTGGCAGGAATCTCATCAATCCTGGGAGCAGTAAACTTTATCTCAACAGTAATTAATATGCGATCAACAGGAATTACCTTTGATCGAATACCACTCTTCGTCTGGGCAGTAGCTATTACAGCCCTACTTCTTCTGCTGTCACTTCCTGTATTAGCAGGAGCAATCACCATACTATTAACAGATCGTAATTTAAACACATCATTCTTTGACCCAGCAGGAGGTGGGGACCCAATTTTGTACCAACACTTATTC
>3075_Stenagostus_umbratilis_Ibaraki_Honshu_Japan
AACACTCTACTTTTTATTCGGGGCCTGGGCCGGAATACTGGGAACTTCACTAAGACTCCTAATCCGAGCAGAACTGGGCAATCCCGGATCTTTAATCGGAAACGACCAAATCTATAACGTCATTGTAACAGCACACGCTTTCATCATAATTTTCTTCATAGTAATACCAATCATAATTGGGGGTTTCGGAAACTGATTAGTGCCCCTAATACTGGGGGCCCCTGACATAGCATTCCCACGAATAAATAATATAAGATTTTGGTTTTTACCACCTTCACTATCACTTCTATTAATAAGAAGAATTGTTGAAAACGGGGCAGGAACAGGATGAACCGTCTACCCGCCCCTATCTGCCAACATCGCTCACAGAGGTTCATCAGTAGACCTAGCAATTTTTAGTCTTCACCTGGCCGGAATCTCATCAATCCTGGGAGCAGTAAACTTTATCTCAACAGTAATTAATATACGATCAACAGGAATTACCTTTGATCGAATACCACTCTTCGTCTGGGCAGTAGCTATTACAGCCCTACTTCTTCTGCTATCACTTCCTGTATTGGCAGGAGCAATCACCATACTATTAACAGATCGTAATTTAAACACATCATTCTTTGACCCAGCAGGAGGTGGAGACCCAATTTTGTACCAACACTTATTC
>3076_Stenagostus_umbratilis_Ibaraki_Honshu_Japan
AACACTCTACTTTTTATTCGGGGCCTGGGCCGGAATACTGGGAACTTCACTAAGACTCCTAATCCGAGCAGAACTGGGCAATCCCGGATCTTTAATCGGAAACGACCAAATCTATAACGTCATTGTAACAGCACACGCTTTCATCATAATTTTCTTCATAGTAATACCAATCATAATTGGGGGTTTCGGAAACTGATTAGTGCCCCTAATACTGGGGGCCCCTGACATAGCATTCCCACGAATAAATAATATAAGATTTTGGTTTTTACCACCTTCACTATCACTTCTATTAATAAGAAGAATTGTTGAAAACGGGGCAGGAACAGGATGAACCGTCTACCCGCCCCTATCTGCCAACATCGCTCACAGAGGTTCATCAGTAGACCTAGCAATTTTTAGTCTTCACCTGGCCGGAATCTCATCAATCCTGGGAGCAGTAAACTTTATCTCAACAGTAATTAATATACGATCAACAGGAATTACCTTTGATCGAATACCACTCTTCGTCTGGGCAGTAGCTATTACAGCCCTACTTCTTCTGCTATCACTTCCTGTATTGGCAGGAGCAATCACCATACTATTAACAGATCGTAATTTAAACACATCATTCTTTGACCCAGCAGGAGGTGGAGACCCAATTTTGTACCAACACTTATTC
>3091_Stenagostus_umbratilis_Ibaraki_Honshu_Japan
AACACTCTACTTTTTATTCGGGGCCTGGGCCGGAATACTGGGAACTTCACTAAGACTCCTAATCCGAGCAGAACTGGGCAATCCCGGATCTTTAATCGGAAACGACCAAATCTATAACGTCATTGTAACAGCACACGCTTTCATCATAATTTTCTTCATAGTAATACCAATCATAATTGGGGGTTTCGGAAACTGATTAGTGCCCCTAATACTGGGGGCCCCTGACATAGCATTCCCACGAATAAATAATATAAGATTTTGGTTTTTACCACCTTCACTATCACTTCTATTAATAAGAAGAATTGTTGAAAACGGGGCAGGAACAGGATGAACCGTCTACCCGCCCCTATCTGCCAACATCGCTCACAGAGGTTCATCAGTAGACCTAGCAATTTTTAGTCTTCACCTGGCCGGAATCTCATCAATCCTGGGAGCAGTAAACTTTATCTCAACAGTAATTAATATACGATCAACAGGAATTACCTTTGATCGAATACCACTCTTCGTCTGGGCAGTAGCTATTACAGCCCTACTTCTTCTGCTATCACTTCCTGTATTGGCAGGAGCAATCACCATACTATTAACAGATCGTAATTTAAACACATCATTCTTTGACCCAGCAGGAGGTGGAGACCCAATTTTGTACCAACACTTATTC
>3103_Stenagostus_umbratilis_Ibaraki_Honshu_Japan
AACACTCTACTTTTTATTCGGGGCCTGGGCCGGAATACTAGGAACTTCACTAAGACTCCTAATCCGAGCAGAACTGAGCAATCCCGGATCTTTAATCGGAAACGACCAAATCTATAACGTCATTGTAACAGCACACGCTTTCATCATAATTTTCTTCATAGTAATACCAATCATAATTGGGGGTTTCGGAAACTGATTAGTGCCCCTAATACTGGGGGCCCCTGACATAGCATTCCCACGAATAAATAATATAAGATTTTGGTTTTTACCACCTTCACTATCACTTCTATTAATAAGAAGAATTGTTGAAAACGGGGCAGGAACAGGATGAACTGTCTACCCGCCCCTATCTGCCAACATCGCTCACAGAGGTTCATCAGTAGACCTAGCAATTTTTAGTCTTCACCTAGCAGGAATCTCATCAATCCTGGGAGCAGTAAACTTTATCTCAACAGTAATTAATATGCGATCAACAGGAATTACCTTTGATCGAATACCACTCTTCGTCTGGGCAGTAGCTATTACAGCCCTACTTCTTCTGCTGTCACTTCCTGTATTAGCAGGAGCAATCACCATACTATTAACAGATCGTAATTTAAACACATCATTCTTTGACCCAGCAGGAGGTGGGGACCCAATTTTGTACCAACACTTATTC
>3104_Stenagostus_umbratilis_Ibaraki_Honshu_Japan
AACACTCTACTTTTTATTCGGGGCCTGGGCCGGAATACTGGGAACTTCACTAAGACTCCTAATCCGAGCAGAACTGGGCAATCCCGGATCTTTAATCGGAAACGACCAAATCTATAACGTCATTGTAACAGCACACGCTTTCATCATAATTTTCTTCATAGTAATACCAATCATAATTGGGGGTTTCGGAAACTGATTAGTGCCCCTAATACTGGGGGCCCCTGACATAGCATTCCCACGAATAAATAATATAAGATTTTGGTTTTTACCACCTTCACTATCACTTCTATTAATAAGAAGAATTGTTGAAAACGGGGCAGGAACAGGATGAACCGTCTACCCGCCCCTATCTGCCAACATCGCTCACAGAGGTTCATCAGTAGACCTAGCAATTTTTAGTCTTCACCTGGCCGGAATCTCATCAATCCTGGGAGCAGTAAACTTTATCTCAACAGTAATTAATATACGATCAACAGGAATTACCTTTGATCGAATACCACTCTTCGTCTGGGCAGTAGCTATTACAGCCCTACTTCTTCTGCTATCACTTCCTGTATTGGCAGGAGCAATCACCATACTATTAACAGATCGTAATTTAAACACATCATTCTTTGACCCAGCAGGAGGTGGAGACCCAATTTTGTACCAACACTTATTC
>3106_Stenagostus_umbratilis_Ibaraki_Honshu_Japan
AACACTCTACTTTTTATTCGGGGCCTGGGCCGGAATACTGGGAACTTCACTAAGACTCCTAATCCGAGCAGAACTGGGCAATCCCGGATCTTTAATCGGAAACGACCAAATCTATAACGTCATTGTAACAGCACACGCTTTCATCATAATTTTCTTCATAGTAATACCAATCATAATTGGGGGTTTCGGAAACTGATTAGTGCCCCTAATACTGGGGGCCCCTGACATAGCATTCCCACGAATAAATAATATAAGATTTTGGTTTTTACCACCTTCACTATCACTTCTATTAATAAGAAGAATTGTTGAAAACGGGGCAGGAACAGGATGAACCGTCTACCCGCCCCTATCTGCCAACATCGCTCACAGAGGTTCATCAGTAGACCTAGCAATTTTTAGTCTTCACCTGGCCGGAATCTCATCAATCCTGGGAGCAGTAAACTTTATCTCAACAGTAATTAATATACGATCAACAGGAATTACCTTTGATCGAATACCACTCTTCGTCTGGGCAGTAGCTATTACAGCCCTACTTCTTCTGCTATCACTTCCTGTATTGGCAGGAGCAATCACCATACTATTAACAGATCGTAATTTAAACACATCATTCTTTGACCCAGCAGGAGGTGGAGACCCAATTTTGTACCAACACTTATTC
>3107_Stenagostus_umbratilis_Ibaraki_Honshu_Japan
AACACTCTACTTTTTATTCGGGGCCTGGGCCGGAATACTGGGAACTTCACTAAGACTCCTAATCCGAGCAGAACTGGGCAATCCCGGATCTTTAATCGGAAACGACCAAATCTATAACGTCATTGTAACAGCACACGCTTTCATCATAATTTTCTTCATAGTAATACCAATCATAATTGGGGGTTTCGGAAACTGATTAGTGCCCCTAATACTGGGGGCCCCTGACATAGCATTCCCACGAATAAATAATATAAGATTTTGGTTTTTACCACCTTCACTATCACTTCTATTAATAAGAAGAATTGTTGAAAACGGGGCAGGAACAGGATGAACCGTCTACCCGCCCCTATCTGCCAACATCGCTCACAGAGGTTCATCAGTAGACCTAGCAATTTTTAGTCTTCACCTGGCCGGAATCTCATCAATCCTGGGAGCAGTAAACTTTATCTCAACAGTAATTAATATACGATCAACAGGAATTACCTTTGATCGAATACCACTCTTCGTCTGGGCAGTAGCTATTACAGCCCTACTTCTTCTGCTATCACTTCCTGTATTGGCAGGAGCAATCACCATACTATTAACAGATCGTAATTTAAACACATCATTCTTTGACCCAGCAGGAGGTGGAGACCCAATTTTGTACCAACACTTATTC
>3108_Stenagostus_umbratilis_Ibaraki_Honshu_Japan
AACACTCTACTTTTTATTCGGGGCCTGGGCCGGAATACTGGGAACTTCACTAAGACTCCTAATCCGAGCAGAACTGGGCAATCCCGGATCTTTAATCGGAAACGACCAAATCTATAACGTCATTGTAACAGCACACGCTTTCATCATAATTTTCTTCATAGTAATACCAATCATAATTGGGGGTTTCGGAAACTGATTAGTGCCCCTAATACTGGGGGCCCCTGACATAGCATTCCCACGAATAAATAATATAAGATTTTGGTTTTTACCACCTTCACTATCACTTCTATTAATAAGAAGAATTGTTGAAAACGGGGCAGGAACAGGATGAACCGTCTACCCGCCCCTATCTGCCAACATCGCTCACAGAGGTTCATCAGTAGACCTAGCAATTTTTAGTCTTCACCTGGCCGGAATCTCATCAATCCTGGGAGCAGTAAACTTTATCTCAACAGTAATTAATATACGATCAACAGGAATTACCTTTGATCGAATACCACTCTTCGTCTGGGCAGTAGCTATTACAGCCCTACTTCTTCTGCTATCACTTCCTGTATTGGCAGGAGCAATCACCATACTATTAACAGATCGTAATTTAAACACATCATTCTTTGACCCAGCAGGAGGTGGAGACCCAATTTTGTACCAACACTTATTC
>3109_Stenagostus_umbratilis_Ibaraki_Honshu_Japan
AACACTCTACTTTTTATTCGGGGCCTGGGCCGGAATACTGGGAACTTCACTAAGACTCCTAATCCGAGCAGAACTGGGCAATCCCGGATCTTTAATCGGAAACGACCAAATCTATAACGTCATTGTAACAGCACACGCTTTCATCATAATTTTCTTCATAGTAATACCAATCATAATTGGGGGTTTCGGAAACTGATTAGTGCCCCTAATACTGGGGGCCCCTGACATAGCATTCCCACGAATAAATAATATAAGATTTTGGTTTTTACCACCTTCACTATCACTTCTATTAATAAGAAGAATTGTTGAAAACGGGGCAGGAACAGGATGAACCGTCTACCCGCCCCTATCTGCCAACATCGCTCACAGAGGTTCATCAGTAGACCTAGCAATTTTTAGTCTTCACCTGGCCGGAATCTCATCAATCCTGGGAGCAGTAAACTTTATCTCAACAGTAATTAATATACGATCAACAGGAATTACCTTTGATCGAATACCACTCTTCGTCTGGGCAGTAGCTATTACAGCCCTACTTCTTCTGCTATCACTTCCTGTATTGGCAGGAGCAATCACCATACTATTAACAGATCGTAATTTAAACACATCATTCTTTGACCCAGCAGGAGGTGGAGACCCAATTTTGTACCAACACTTATTC
>3081_Medakathous_jactatus_Ibaraki_Honshu_Japan
AACCCTTTACTTCCTATTTGGAGCATGATCTGGAATATTAGGAACTTCATTAAGCCTATTAATTCGTGCAGAACTGGGTAACCCCGGATCATTAATTGGCAATGACCAAATCTATAATGTCATTGTCACAGCCCACGCTTTTATCATAATTTTCTTCATAGTAATGCCTATTATAATTGGAGGATTCGGAAATTGACTAGTCCCTCTAATACTAGGAGCCCCAGATATAGCATTCCCTCGAATAAACAATATAAGATTCTGATTCCTACCCCCCTCTCTATCTCTTTTGCTAATAAGAAGAATTGTAGAAAATGGAGCTGGTACAGGATGAACAGTATACCCCCCTCTATCAGCTAACATTGCTCATAGAGGGTCCTCTGTAGATTTAGCCATTTTTAGTCTACACCTAGCTGGGATCTCCTCAATTCTAGGAGCAGTAAATTTTATTTCAACAGTAATTAATATACGATCAACTGGAATTACATTTGATCGGATACCTTTATTTGTTTGAGCAGTTGCCATTACAGCGCTTTTACTTCTCTTATCACTCCCAGTCCTTGCAGGAGCAATCACAATACTTTTAACTGATCGAAACTTAAATACGTCATTCTTTGACCCAGCAGGAGGAGGTGACCCTATTCTTTACCAACACCTATTC
>3082_Medakathous_jactatus_Ibaraki_Honshu_Japan
AACCCTTTACTTCCTATTTGGAGCATGATCTGGAATATTAGGAACTTCATTAAGCCTATTAATTCGTGCAGAACTGGGTAACCCCGGATCATTAATTGGCAATGACCAAATCTATAATGTCATTGTCACAGCCCACGCTTTTATCATAATTTTCTTCATAGTAATGCCTATTATAATTGGAGGATTCGGAAATTGACTAGTCCCTCTAATACTAGGAGCCCCAGATATAGCATTCCCTCGAATAAACAATATAAGATTCTGATTCCTACCCCCCTCTCTATCTCTTTTGCTAATAAGAAGAATTGTAGAAAATGGAGCTGGTACAGGATGAACAGTATACCCCCCTCTATCAGCTAACATTGCTCATAGAGGGTCCTCTGTAGATTTAGCCATTTTTAGTCTACACCTAGCTGGGATCTCCTCAATTCTAGGAGCAGTAAATTTTATTTCAACAGTAATTAATATACGATCAACTGGAATTACATTTGATCGGATACCTTTATTTGTTTGAGCAGTTGCCATTACAGCGCTTTTACTTCTCTTATCACTCCCAGTCCTTGCAGGAGCAATCACAATACTTTTAACTGATCGAAACTTAAATACGTCATTCTTTGACCCAGCAGGAGGAGGTGACCCTATTCTTTACCAACACCTATTC
>212_Denticollis_nigricollis_Hongcheon_GW
AACACTTTATTTCCTTTTTGGAGCCTGAGCTGGAATACTTGGAACTTCATTAAGACTTTTAATTCGAGCTGAATTAGGGAACCCCGGCTCTCTAATTGGTAATGATCAAATCTATAATGTGATTGTTACAGCTCATGCCTTTATCATAATTTTCTTCATAGTAATACCTATCATAATTGGGGGATTTGGAAATTGACTTGTTCCCCTTATATTAGGAGCACCTGATATAGCTTTTCCACGAATAAATAATATAAGATTTTGATTTTTACCTCCATCGCTTTCATTACTATTAATAAGAAGAATTGTAGAAAATGGAGCAGGAACAGGATGAACAGTATATCCTCCTCTATCAGCAAATATTGCCCATAGAGGTTCATCTGTTGATTTAGCTATTTTCAGATTACATTTAGCAGGAATTTCATCAATTTTAGGAGCAGTAAATTTTATTTCAACAGTAATCAATATACGATCAACTGGAATTACATTTGATCGCATACCATTATTTGTATGAGCTGTAGTAATTACAGCTTTACTTCTTCTTCTTTCTCTTCCAGTTTTAGCCGGAGCTATTACTATATTATTAACAGATCGAAATTTGAATACATCATTCTTTGATCCAGCTGGTGGTGGTGATCCAATTCTTTATCAACACTTATTT
>213_Denticollis_nigricollis_Mt_Bangtae_Injae_GW
AACACTTTATTTCCTTTTTGGGGCCTGAGCTGGAATACTTGGAACTTCATTAAGACTTTTAATTCGAGCTGAATTAGGGAACCCCGGCTCTCTAATTGGTAATGATCAAATCTATAATGTGATTGTTACAGCTCATGCCTTTATCATAATTTTCTTCATAGTAATACCTATCATAATTGGAGGATTTGGAAATTGACTTGTTCCCCTTATATTAGGAGCACCTGATATAGCTTTTCCACGAATAAATAATATAAGATTTTGATTTTTACCTCCATCGCTTTCATTACTATTAATAAGAAGAATTGTAGAAAATGGAGCAGGAACAGGATGAACAGTATATCCTCCTCTATCAGCAAATATTGCCCATAGAGGTTCATCTGTTGATTTAGCTATTTTCAGATTACATTTAGCAGGAATTTCATCAATTTTAGGAGCAGTAAATTTTATTTCAACAGTAATCAATATACGATCAACTGGAATTACATTTGATCGCATACCATTATTTGTATGAGCTGTAGTAATTACAGCTTTACTTCTTCTTCTTTCTCTTCCAGTTTTAGCCGGAGCTATTACTATATTATTAACAGATCGAAATTTGAATACATCATTCTTTGATCCAGCTGGTGGTGGTGATCCAATTCTTTATCAACACTTATTT
>215_Denticollis_nigricollis_Mt_Baekdeok_Phyeongchang_GW
AACACTTTATTTCCTTTTTGGAGCCTGAGCTGGAATACTTGGAACTTCATTAAGACTTTTAATTCGAGCTGAATTAGGGAACCCCGGCTCTCTAATTGGTAATGATCAAATCTATAATGTGATTGTTACAGCTCATGCCTTTATTATAATTTTCTTCATAGTAATACCTATCATAATTGGGGGATTTGGAAATTGACTTGTTCCCCTTATATTAGGAGCACCTGATATAGCTTTTCCACGAATAAACAATATAAGATTTTGGTTTTTACCTCCATCGCTTTCATTACTATTAATAAGAAGAATTGTAGAAAATGGAGCAGGAACAGGATGAACAGTATATCCTCCTCTATCAGCAAATATTGCCCATAGAGGTTCATCTGTTGATTTAGCTATTTTCAGATTACATTTAGCAGGAATTTCATCAATTTTAGGAGCAGTAAATTTTATTTCAACAGTAATCAATATACGATCAACTGGAATTACATTTGATCGTATACCATTATTTGTATGAGCTGTAGTAATTACAGCTTTACTCCTTCTTCTTTCTCTTCCAGTTTTAGCCGGAGCTATTACTATATTATTAACAGATCGAAATTTGAATACATCATTCTTTGATCCAGCTGGTGGTGGTGATCCAATTCTTTATCAACACTTATTT
>357_Denticollis_nigricollis_Mt_Gyebang_Phyeongchang_GW
AACACTTTATTTCCTTTTTGGAGCCTGAGCTGGAATACTTGGAACTTCATTAAGACTTTTAATTCGAGCTGAATTAGGGAACCCCGGCTCTCTAATTGGTAATGATCAAATCTATAATGTGATTGTTACAGCTCAGGCCTTTATTATAATTTTCTTCATAGTAATACCTATCATAATTGGGGGATTCGGAAATTGACTTGTTCCCCTTATATTAGGAGCACCTGATATAGCTTTCCCACGAATAAACAATATAAGATTTTGATTTTTACCTCCATCGCTTTCATTACTATTAATAAGAAGAATTGTAGAAAATGGAGCAGGAACAGGATGAACAGTATATCCTCCTCTATCAGCAAATATTGCCCATAGAGGTTCATCTGTTGATTTAGCTATTTTCAGATTACATTTAGCAGGAATTTCATCAATTTTAGGAGCAGTAAATTTTATTTCAACAGTAATCAATATACGATCAACTGGAATTACATTTGATCGTATACCATTATTTGTATGAGCTGTAGTAATTACAGCTTTACTTCTTCTTCTTTCTCTTCCAGTTTTAGCCGGAGCTATTACTATATTATTAACAGATCGAAATTTGAATACATCATTCTTTGATCCAGCTGGTGGTGGTGATCCAATTCTTTATCAACACTTATTT
>358_Denticollis_nigricollis_Mt_Gyebang_Phyeongchang_GW
AACACTTTATTTCCTTTTTGGAGCCTGAGCTGGAATACTTGGAACTTCATTAAGACTTTTAATTCGAGCTGAATTAGGGAACCCCGGCTCTCTAATTGGTAATGATCAAATCTATAATGTGATTGTTACAGCTCAGGCCTTTATTATAATTTTCTTCATAGTAATACCTATCATAATTGGGGGATTTGGAAATTGACTTGTTCCCCTTATATTAGGAGCACCTGATATAGCTTTTCCACGAATAAACAATATAAGATTTTGGTTTTTACCTCCATCGCTTTCATTACTATTAATAAGAAGAATTGTAGAAAATGGAGCAGGAACAGGATGAACAGTATATCCTCCTCTATCAGCAAATATTGCCCATAGAGGTTCATCTGTTGATTTAGCTATTTTCAGATTGCATTTAGCAGGAATTTCATCAATTTTAGGAGCAGTAAATTTTATTTCAACAGTAATCAATATACGATCAACTGGAATTACATTTGATCGTATACCATTATTTGTATGAGCTGTAGTAATTACAGCTTTACTCCTTCTTCTTTCTCTTCCAGTTTTAGCCGGAGCTATTACTATATTATTAACAGATCGAAATTTGAATACATCATTCTTTGATCCAGCTGGTGGTGGTGATCCAATTCTTTATCAACACTTATTT
>359_Denticollis_nigricollis_Mt_Gyebang_Phyeongchang_GW
AACACTTTATTTCCTTTTTGGAGCCTGAGCTGGAATACTTGGAACTTCATTAAGACTTTTAATTCGAGCTGAATTAGGGAACCCCGGCTCTCTAATTGGTAATGATCAAATCTATAATGTGATTGTTACAGCTCATGCCTTTATTATAATTTTCTTCATAGTAATACCTATCATAATTGGGGGATTTGGAAATTGACTTGTTCCCCTTATATTAGGAGCACCTGATATAGCTTTTCCACGAATAAACAATATAAGATTTTGGTTTTTACCTCCATCGCTTTCATTACTATTAATAAGAAGAATTGTAGAAAATGGAGCAGGAACAGGATGAACAGTATATCCTCCTCTATCAGCAAATATTGCCCATAGAGGTTCATCTGTTGATTTAGCTATTTTCAGATTGCATTTAGCAGGAATTTCATCAATTTTAGGAGCAGTAAATTTTATTTCAACAGTAATCAATATACGATCAACTGGAATTACATTTGATCGTATACCATTATTTGTATGAGCTGTAGTAATTACAGCTTTACTCCTTCTTCTTTCTCTTCCAGTTTTAGCCGGAGCTATTACTATATTATTAACAGATCGAAATTTGAATACATCATTCTTTGATCCAGCTGGTGGTGGTGATCCAATTCTTTATCAACACTTATTT
>1007_Denticollis_nirgircollis_Yongphyeong_GW
AACACTTTATTTCCTTTTTGGAGCCTGAGCTGGAATACTTGGAACTTCATTAAGACTTTTAATTCGAGCTGAATTAGGGAACCCCGGCTCTCTAATTGGTAATGATCAAATCTATAATGTGATTGTTACAGCTCATGCCTTTATTATAATTTTCTTCATAGTAATACCTATCATAATTGGGGGATTTGGAAATTGACTTGTTCCCCTTATATTAGGAGCACCTGATATAGCTTTTCCACGAATAAACAATATAAGATTTTGGTTTTTACCTCCATCGCTTTCATTACTATTAATAAGAAGAATTGTAGAAAATGGAGCAGGAACAGGATGAACAGTATATCCTCCTCTATCAGCAAATATTGCCCATAGAGGTTCATCTGTTGATTTAGCTATTTTCAGATTGCATTTAGCAGGAATTTCATCAATTTTAGGAGCAGTAAATTTTATTTCAACAGTAATCAATATACGATCAACTGGAATTACATTTGATCGTATACCATTATTTGTATGAGCTGTAGTAATTACAGCTTTACTCCTTCTTCTTTCTCTTCCAGTTTTAGCCGGAGCTATTACTATATTATTAACAGATCGAAATTTGAATACATCATTCTTTGATCCAGCTGGTGGTGGTGATCCAATTCTTTATCAACACTTATTT
>2272_Denticollis_nigricollis_Mt_Odae_phyeongchang_GW
AACACTTTATTTCCTTTTTGGAGCCTGAGCTGGAATACTTGGAACTTCATTAAGACTTTTAATTCGAGCTGAATTAGGGAACCCCGGCTCTCTAATTGGTAATGATCAAATCTATAATGTGATTGTTACAGCTCATGCCTTTATTATAATTTTCTTCATAGTAATACCTATCATAATTGGGGGATTTGGAAATTGACTTGTTCCCCTTATATTAGGAGCACCTGATATAGCTTTTCCACGAATAAATAATATAAGATTTTGATTTTTACCCCCATCGCTTTCATTACTATTAATAAAAAGAATTGTAGAAAATGGAGCAGGAACAGGATGAACAGTATATCCTCCTCTATCAGCAAATATTGCCCATAGAGGTTCATCTGTTGATTTAGCTATTTTCAGATTACATTTAGCAGGAATTTCATCAATTTTAGGAGCAGTAAATTTTATTTCAACAGTAATCAATATACGATCAACTGGAATTACATTTGATCGTATACCATTATTTGTATGAGCTGTAGTAATTACAGCTTTACTTCTTCTTCTCTCTCTTCCAGTTTTAGCCGGAGCTATTACTATATTATTAACAGATCGAAATTTGAATACATCATTCTTTGATCCAGCTGGTGGTGGTGATCCAATTCTTTATCAACACTTATTT
>2285_Denticollis_nigricollis_Mt_Odae_GW
AACACTTTATTTCCTTTTTGGAGCCTGAGCTGGAATACTTGGAACTTCATTAAGACTTTTAATTCGAGCTGAATTAGGGAACCCCGGCTCTCTAATTGGTAATGATCAAATCTATAATGTGATTGTTACAGCTCATGCCTTTATTATAATTTTCTTCATAGTAATACCTATCATAATTGGGGGATTTGGAAATTGACTTGTTCCCCTTATATTAGGAGCACCTGATATAGCTTTTCCACGAATAAATAATATAAGATTTTGATTTTTACCTCCATCGCTTTCATTACTATTAATAAGAAGAATTGTAGAAAATGGAGCAGGAACAGGATGAACAGTATATCCTCCTCTATCAGCAAATATTGCCCATAGAGGTTCATCTGTTGATTTAGCTATTTTCAGATTACATTTAGCAGGAATTTCATCAATTTTAGGAGCAGTAAATTTTATTTCAACAGTAATCAATATACGATCAACTGGAATTACATTTGATCGTATACCATTATTTGTATGAGCTGTAGTAATTACAGCTTTACTTCTTCTTCTCTCTCTTCCAGTTTTAGCCGGAGCTATTACTATATTATTAACAGATCGAAATTTGAATACATCATTCTTTGATCCAGCTGGTGGTGGTGATCCAATTCTTTATCAACACTTATTT
>2691_Denticollis_nigricollis_Mt_Hwaya_Gaphyeong_GG
AACACTTTATTTCCTTTTTGGGGCCTGAGCTGGAATACTTGGAACTTCATTAAGACTTTTAATTCGAGCTGAATTAGGGAATCCAGGCTCTCTAATTGGTAATGATCAAATCTATAATGTGATTGTTACAGCTCATGCCTTTATTATAATTTTCTTCATAGTAATACCTATCATAATTGGAGGATTTGGAAATTGACTTGTTCCCCTTATATTAGGAGCACCTGATATAGCTTTCCCACGAATAAACAATATAAGATTTTGATTTTTACCCCCATCGCTTTCATTACTATTAATAAGAAGAATTGTAGAAAATGGAGCAGGAACAGGATGAACAGTATATCCTCCACTATCAGCAAATATTGCCCATAGAGGTTCATCTGTTGATTTAGCTATTTTCAGATTACATTTAGCAGGAATTTCATCAATTTTAGGAGCAGTAAATTTTATTTCAACAGTGATCAATATACGATCAACTGGAATTACCTTTGATCGTATACCATTATTTGTATGAGCTGTAGTAATTACAGCTTTACTTCTTCTTCTTTCTCTTCCAGTTTTAGCCGGAGCTATTACTATATTATTAACAGATCGAAATTTAAATACATCATTCTTTGATCCAGCTGGTGGTGGTGATCCAATTCTTTATCAACACTTATTT
>2838_Denticollis_nigricollis_Mt_Seolak_Sockcho_GW
AACACTTTATTTCCTTTTTGGGGCCTGAGCTGGAATACTTGGAACTTCATTAAGACTTTTAATTCGAGCTGAATTAGGGAATCCAGGTTCTCTAATTGGTAATGATCAAATCTATAATGTGATTGTTACAGCTCATGCCTTTATTATAATTTTCTTCATAGTAATACCTATCATAATTGGGGGATTTGGAAATTGACTTGTTCCCCTTATATTAGGAGCACCTGATATAGCTTTTCCACGAATAAATAATATAAGATTTTGATTTTTACCTCCGTCTCTTTCATTGCTATTAATAAGAAGAATTGTAGAAAATGGAGCAGGAACAGGATGAACAGTATATCCTCCCTTATCAGCAAATATTGCCCATAGAGGCTCATCTGTTGATTTAGCTATTTTCAGATTACATTTAGCAGGAATTTCATCAATTTTAGGAGCAGTAAATTTTATTTCAACAGTGATCAATATACGATCAACTGGAATTACATTTGATCGTATACCATTATTTGTATGAGCTGTAGTAATTACAGCCTTACTTCTTCTCCTTTCTCTTCCAGTTTTAGCCGGAGCTATCACTATATTATTAACAGATCGAAATTTAAATACATCATTCTTTGATCCAGCTGGTGGTGGTGATCCAATTCTTTATCAACACTTATTT
>3035_Denticollis_nigricollis_Misiryeong_Injae_GW
AACACTTTATTTCCTTTTTGGGGCCTGAGCTGGAATACTTGGAACTTCATTAAGACTTTTAATTCGAGCTGAATTAGGGAATCCAGGTTCTCTAATTGGTAATGATCAAATCTATAATGTGATTGTTACAGCTCATGCCTTTATTATAATTTTCTTCATAGTAATACCTATCATAATTGGGGGATTTGGAAATTGACTTGTTCCCCTTATATTAGGAGCACCTGATATAGCTTTTCCACGAATAAATAATATAAGATTTTGATTTTTACCTCCGTCTCTTTCATTACTATTAATAAGAAGAATTGTAGAAAATGGAGCAGGAACAGGATGAACAGTATATCCTCCCTTATCAGCAAATATTGCCCATAGAGGTTCATCTGTTGATTTAGCTATTTTCAGATTACATTTAGCAGGAATTTCATCAATTTTAGGAGCAGTAAATTTTATTTCAACAGTGATCAATATACGATCAACTGGAATTACATTTGATCGTATACCATTATTTGTATGAGCTGTAGTAATTACAGCCTTACTTCTTCTCCTTTCTCTTCCAGTTTTAGCCGGAGCTATTACTATATTATTAACAGATCGAAATTTAAATACATCATTCTTTGATCCAGCTGGTGGTGGTGATCCAATTCTTTATCAACACTTATTT
>3404_Denticollis_nigricollis_Bonghwa_GB
AACACTTTATTTCCTTTTTGGAGCCTGAGCTGGAATACTTGGAACTTCATTAAGACTTTTAATTCGAGCTGAATTAGGGAACCCCGGCTCTCTAATTGGTAATGATCAAATCTATAATGTGATTGTTACAGCTCATGCCTTTATTATAATTTTCTTCATAGTAATACCTATCATAATTGGGGGATTTGGAAATTGACTTGTTCCCCTTATATTAGGAGCACCTGATATAGCTTTTCCACGAATAAATAATATAAGATTTTGATTTTTACCTCCATCGCTTTCATTACTATTAATAAGAAGAATTGTAGAGAATGGAGCAGGAACAGGATGAACAGTATATCCTCCTCTATCAGCAAATATTGCCCATAGAGGTTCATCTGTTGATTTAGCTATTTTCAGATTACATTTAGCAGGAATTTCATCAATTTTAGGAGCAGTAAATTTTATTTCAACAGTAATCAATATACGATCAACTGGAATTACATTTGATCGTATACCATTATTTGTATGAGCTGTGGTAATTACAGCTTTACTTCTTCTTCTTTCTCTTCCAGTTTTAGCCGGAGCTATTACTATATTATTAACAGATCGAAATTTGAATACATCATTCTTTGATCCAGCTGGTGGTGGTGATCCAATTCTTTATCAACACTTGTTT
>3405_Denticollis_nigricollis_Bonghwa_GB
AACACTTTATTTCCTTTTTGGAGCCTGAGCTGGAATACTTGGAACTTCATTAAGACTTTTAATTCGAGCTGAATTAGGGAACCCCGGCTCTCTAATTGGTAATGATCAAATCTATAATGTGATTGTTACAGCTCATGCCTTTATTATAATTTTCTTCATAGTAATACCTATCATAATTGGGGGATTTGGAAATTGACTTGTTCCCCTTATATTAGGAGCACCTGATATAGCTTTTCCACGAATAAATAATATAAGATTTTGATTTTTACCTCCGTCACTTTCATTACTATTAATAAGAAGAATTGTAGAAAATGGAGCAGGAACAGGATGAACAGTATATCCTCCTCTATCAGCAAATATTGCCCATAGAGGTTCATCTGTTGATTTAGCTATTTTCAGATTACATTTAGCAGGAATTTCATCAATTTTAGGAGCAGTAAATTTTATTTCGACAGTAATCAATATACGATCAACTGGAATTACATTTGATCGTATGCCATTATTTGTATGAGCTGTAGTAATTACAGCTTTACTTCTTCTTCTTTCTCTTCCAGTTTTAGCCGGAGCTATTACTATATTATTAACAGATCGAAATTTAAATACATCATTCTTTGATCCAGCTGGTGGTGGTGATCCAATTCTTTATCAACACTTATTT
>3422_Denticollis_nigricollis_Bonghwa_GB
AACACTTTATTTCCTTTTTGGAGCCTGAGCTGGAATACTTGGAACTTCATTAAGACTTTTAATTCGAGCTGAATTAGGGAACCCCGGCTCTCTAATTGGTAATGATCAAATCTATAATGTGATTGTTACAGCTCATGCCTTTATTATAATTTTCTTCATAGTAATACCTATCATAATTGGGGGATTTGGAAATTGACTTGTTCCCCTTATATTAGGAGCACCTGATATAGCTTTTCCACGAATAAATAATATAAGATTTTGATTTTTACCTCCATCGCTTTCATTACTATTAATAAGAAGAATTGTAGAGAATGGAGCAGGAACAGGATGAACAGTATATCCTCCTCTATCAGCAAATATTGCCCATAGAGGTTCATCTGTTGATTTAGCTATTTTCAGATTACATTTAGCAGGAATTTCATCAATTTTAGGAGCAGTAAATTTTATTTCAACAGTAATCAATATACGATCAACTGGAATTACATTTGATCGTATACCATTATTTGTATGAGCTGTGGTAATTACAGCTTTACTTCTTCTTCTTTCTCTTCCAGTTTTAGCCGGAGCTATTACTATATTATTAACAGATCGAAATTTGAATACATCATTCTTTGATCCAGCTGGTGGTGGTGATCCAATTCTTTATCAACACTTGTTT
>3343_Denticollis_nigricollis_subsp_1_Mt_Jiri_JN
AACACTTTATTTCCTTTTTGGAGCCTGAGCTGGAATACTTGGAACTTCATTAAGACTTTTAATTCGAGCTGAATTAGGGAACCCCGGCTCTCTAATTGGTAATGATCAAATCTATAATGTGATTGTTACAGCTCATGCCTTTATTATAATTTTCTTCATAGTAATACCTATCATAATTGGGGGATTTGGAAATTGACTTGTTCCCCTTATATTAGGAGCACCTGATATAGCTTTTCCACGAATAAATAATATGAGATTTTGATTTTTACCTCCGTCGCTTTCATTACTATTAATAAGAAGAATTGTAGAAAATGGAGCAGGAACAGGATGAACGGTATATCCACCTCTATCAGCAAATATTGCCCATAGAGGTTCATCTGTTGATTTAGCTATTTTCAGATTACATTTAGCAGGAATTTCATCAATTTTAGGAGCAGTAAATTTTATTTCAACAGTAATCAATATACGATCAACTGGAATTACATTTGATCGTATACCATTATTTGTATGAGCTGTAGTAATTACAGCTTTACTTCTTCTTCTTTCTCTTCCAGTTTTAGCCGGAGCTATTACTATATTATTAACAGATCGAAATTTAAATACATCATTCTTTGATCCAGCTGGTGGTGGTGACCCAATTCTTTATCAACACTTATTT
>3345_Denticollis_nigricollis_subsp_1_Mt_Jiri_JN
AACACTTTATTTCCTTTTTGGAGCCTGAGCTGGAATACTTGGAACTTCATTAAGACTTTTAATTCGAGCTGAATTAGGGAACCCCGGCTCTCTAATTGGTAATGATCAAATCTATAATGTGATTGTTACAGCTCATGCCTTTATTATAATTTTCTTCATAGTAATACCTATCATAATTGGGGGATTTGGAAATTGACTTGTTCCCCTTATATTAGGAGCACCTGATATAGCTTTTCCACGAATAAATAATATGAGATTTTGATTTTTACCTCCGTCGCTTTCATTACTATTAATAAGAAGAATTGTAGAAAATGGAGCAGGAACAGGATGAACGGTATATCCACCTCTATCAGCAAATATTGCCCATAGAGGTTCATCTGTTGATTTAGCTATTTTCAGATTACATTTAGCAGGAATTTCATCAATTTTAGGAGCAGTAAATTTTATTTCAACAGTAATCAATATACGATCAACTGGAATTACATTTGATCGTATACCATTATTTGTATGAGCTGTAGTAATTACAGCTTTACTTCTTCTTCTTTCTCTTCCAGTTTTAGCCGGAGCTATTACTATATTATTAACAGATCGAAATTTAAATACATCATTCTTTGATCCAGCTGGTGGTGGTGACCCAATTCTTTATCAACACTTATTT
>3346_Denticollis_nigricollis_subsp_1_Mt_Jiri_JN
AACACTTTATTTCCTTTTTGGAGCCTGAGCTGGAATACTTGGAACTTCATTAAGACTTTTAATTCGAGCTGAATTAGGGAACCCCGGCTCTCTAATTGGTAATGATCAAATCTATAATGTGATTGTTACAGCTCATGCCTTTATTATAATTTTCTTCATAGTAATACCTATCATAATTGGGGGATTTGGAAATTGACTTGTTCCCCTTATATTAGGAGCACCTGATATAGCTTTTCCACGAATAAATAATATGAGATTTTGATTTTTACCTCCGTCGCTTTCATTACTATTAATAAGAAGAATTGTAGAAAATGGAGCAGGAACAGGATGAACGGTATATCCACCTCTATCAGCAAATATTGCCCATAGAGGTTCATCTGTTGATTTAGCTATTTTCAGATTACATTTAGCAGGAATTTCATCAATTTTAGGAGCAGTAAATTTTATTTCAACAGTAATCAATATACGATCAACTGGAATTACATTTGATCGTATACCATTATTTGTATGAGCTGTAGTAATTACAGCTTTACTTCTTCTTCTTTCTCTTCCAGTTTTAGCCGGAGCTATTACTATATTATTAACAGATCGAAATTTAAATACATCATTCTTTGATCCAGCTGGTGGTGGTGACCCAATTCTTTATCAACACTTATTT
>2306_Denticollis_sp_1_Mt_Odae_GW
AACTCTTTATTTTCTTTTCGGGGCATGAGCAGGAATACTTGGAACTTCTCTAAGACTCTTAATTCGAGCTGAACTAGGAAATCCTGGATCCTTAATTGGAAATGATCAAATCTACAACGTTATTGTTACAGCACACGCCTTTATTATAATTTTCTTCATAGTTATACCTATTATAATTGGAGGATTTGGAAATTGATTAGTTCCCTTAATACTAGGTGCACCAGATATAGCCTTCCCTCGAATAAATAATATAAGTTTCTGGTTTCTTCCCCCCTCCCTTTCTCTTCTTCTAATAAGAAGAATTGTAGAAAATGGTGCAGGAACTGGTTGAACAGTCTACCCCCCTCTATCAGCTAATATTGCTCATAGAGGGTCGTCTGTAGACCTTGCAATTTTTAGTCTCCACCTAGCTGGGATTTCATCAATTTTAGGAGCAGTAAACTTTATTTCTACAGTAATCAATATACGATCTACCGGAATAACATTTGATCGAATACCCCTATTTGTATGAGCAGTAGCTATTACAGCCCTTCTTCTTCTTCTATCTCTTCCAGTTCTAGCTGGAGCTATTACAATACTATTAACTGACCGAAACTTAAATACATCATTCTTCGACCCTGCAGGAGGAGGAGATCCAATCCTTTATCAACATTTATTT
>3615_Denticollis_sp_1_Injae_GW
AACTCTTTATTTTCTTTTCGGGGCATGAGCAGGAATACTTGGAACTTCTCTAAGACTCTTAATTCGAGCTGAACTAGGAAATCCTGGATCCTTAATTGGAAATGATCAAATCTACAACGTTATTGTTACAGCACACGCCTTTATTATAATTTTCTTCATAGTTATACCTATTATAATTGGAGGATTTGGAAATTGATTAGTTCCCTTAATACTAGGTGCACCAGATATAGCCTTCCCTCGAATAAATAATATAAGTTTCTGGTTTCTTCCCCCCTCCCTTTCTCTTCTTCTAATAAGAAGAATTGTAGAAAATGGTGCAGGAACTGGTTGAACAGTCTACCCCCCTCTATCAGCTAATATTGCTCATAGAGGGTCGTCTGTAGACCTTGCAATTTTTAGTCTCCACCTAGCTGGGATTTCATCAATTTTAGGAGCAGTAAACTTTATTTCTACAGTAATTAATATACGATCTACCGGAATAACATTTGATCGAATACCCCTATTTGTATGGGCAGTAGCTATTACAGCCCTTCTTCTTCTTCTATCTCTTCCAGTTCTAGCTGGAGCTATTACAATACTATTAACTGACCGAAACTTAAATACATCATTCTTCGACCCTGCAGGAGGAGGAGACCCAATCCTTTATCAACATTTATTT
>2303_Corymbitodes_sp_1_JJ
AACACTATACTTCCTTTTCGGGGCATGAGCAGGAATACTTGGAACATCCCTTAGACTTCTAATTCGAGCAGAATTAGGAAACCCTGGATCACTAATCGGAAATGATCAAATCTACAATGTTATTGTAACAGCACACGCTTTCATCATAATTTTCTTCATAGTTATACCAATCATAATTGGAGGATTTGGAAACTGACTTGTACCTTTAATACTAGGAGCCCCTGATATAGCATTCCCACGAATAAACAATATAAGATTCTGATTCCTCCCTCCATCATTATCCCTACTATTGATAAGAAGAATTGTAGAAAACGGTGCGGGAACAGGATGAACGGTTTACCCTCCTCTATCAGCCAATATTGCCCACAGAGGTTCATCAGTTGACCTCGCAATCTTTAGACTTCACCTAGCTGGAATTTCTTCCATTCTTGGGGCAGTAAATTTCATTTCAACAGTAATTAATATACGATCTACAGGAATTACCTTTGACCGTATACCATTATTTGTTTGAGCAGTAGCAATCACAGCCCTATTACTACTACTATCTCTTCCAGTATTAGCCGGAGCTATTACTATACTCCTAACAGACCGGAATCTTAACACATCCTTCTTTGACCCTGCTGGAGGAGGAGACCCAATTCTTTACCAACACTTATTT
>2309_Corymbitodes_sp_1_Mt_Odae_GW
AACACTATACTTCCTTTTCGGGGCATGAGCAGGAATACTTGGAACATCCCTTAGACTTCTAATTCGAGCAGAATTAGGAAACCCTGGATCACTAATCGGAAATGATCAAATCTACAATGTTATTGTAACAGCACACGCTTTCATCATAATTTTCTTCATAGTTATACCAATCATAATTGGAGGATTTGGAAACTGACTTGTACCTTTAATACTAGGAGCCCCTGATATAGCATTCCCACGAATAAACAATATAAGATTCTGATTCCTCCCTCCATCATTATCCCTACTATTAATAAGAAGAATTGTAGAAAACGGTGCGGGAACAGGATGAACGGTTTACCCTCCTCTATCAGCCAATATTGCCCACAGAGGTTCATCAGTTGACCTCGCAATCTTTAGACTTCACCTAGCTGGAATTTCTTCCATTCTTGGGGCAGTCAATTTCATTTCAACAGTAATTAATATACGATCTACAGGAATTACCTTTGACCGTATACCATTATTTGTTTGAGCAGTAGCAATCACAGCCCTATTATTACTACTATCTCTTCCAGTATTAGCTGGAGCTATTACTATACTCCTAACAGACCGAAATCTTAACACATCCTTCTTTGACCCTGCTGGAGGAGGAGATCCAATTCTTTACCAACACTTATTT
>2507_Corymbitodes_sp_1_Gongju_CN
AACACTATACTTCCTTTTCGGGGCATGAGCAGGAATACTTGGAACATCCCTTAGACTTCTAATTCGAGCAGAATTAGGAAACCCTGGATCACTAATCGGAAATGATCAAATCTACAATGTTATTGTAACAGCACACGCTTTCATCATAATTTTCTTCATAGTTATACCAATCATAATTGGAGGATTTGGAAACTGACTTGTACCTTTAATACTAGGAGCCCCTGATATAGCATTCCCACGAATAAACAATATAAGATTCTGATTCCTCCCTCCATCATTATCCCTACTATTAATAAGAAGAATTGTAGAAAACGGTGCGGGAACAGGATGAACGGTTTACCCTCCTCTATCAGCCAATATTGCCCACAGAGGTTCATCAGTTGACCTCGCAATCTTTAGACTTCACCTAGCTGGAATTTCTTCCATTCTTGGGGCAGTCAATTTCATTTCAACAGTAATTAATATACGATCTACAGGAATTACCTTTGACCGTATACCATTATTTGTTTGAGCAGTAGCAATCACAGCCCTATTATTACTACTATCTCTTCCAGTATTAGCTGGAGCTATTACTATACTCCTAACAGACCGAAATCTTAACACATCCTTCTTTGACCCTGCTGGAGGAGGAGATCCAATTCTTTACCAACACTTATTT
>2792_Corymbitodes_sp_1_Yeongwol_GW
AACACTATACTTCCTTTTCGGGGCATGAGCAGGAATACTTGGAACATCCCTTAGACTTCTAATTCGAGCAGAATTAGGAAACCCTGGATCACTAATCGGAAATGATCAAATCTACAATGTTATTGTAACAGCACACGCTTTCATCATAATTTTCTTCATAGTTATACCAATCATAATTGGAGGATTTGGAAACTGACTTGTACCTTTAATACTAGGAGCCCCTGATATAGCATTCCCACGAATAAACAATATAAGATTCTGATTCCTCCCTCCATCATTATCCCTACTATTAATAAGAAGAATTGTAGAAAACGGTGCGGGAACAGGATGAACGGTTTACCCTCCTCTATCAGCCAATATTGCCCACAGAGGTTCATCAGTTGACCTCGCAATCTTTAGACTTCACCTAGCTGGAATTTCTTCCATTCTTGGGGCAGTCAATTTCATTTCAACAGTAATTAATATACGATCTACAGGAATTACCTTTGACCGTATACCATTATTTGTTTGAGCAGTAGCAATCACAGCCCTATTATTACTACTATCTCTTCCAGTATTAGCTGGAGCTATTACTATACTCCTAACAGACCGAAATCTTAACACATCCTTCTTTGACCCTGCTGGAGGAGGAGATCCAATTCTTTACCAACACTTATTT
>2804_Corymbitodes_sp_1_sp_nov_Yeongwol_GW
AACACTATACTTCCTTTTCGGGGCATGAGCAGGAATACTTGGAACATCCCTTAGACTTCTAATTCGAGCAGAATTAGGAAACCCTGGATCACTAATCGGAAATGATCAAATCTACAATGTTATTGTAACAGCACACGCTTTCATCATAATTTTCTTCATAGTTATACCAATCATAATTGGAGGATTTGGAAACTGACTTGTACCTTTAATACTAGGAGCCCCTGATATAGCATTCCCACGAATAAACAATATAAGATTCTGATTCCTCCCTCCATCATTATCCCTACTATTAATAAGAAGAATTGTAGAAAACGGTGCGGGAACAGGATGAACGGTTTACCCTCCTCTATCAGCCAATATTGCCCACAGAGGTTCATCAGTTGACCTCGCAATCTTTAGACTTCACCTAGCTGGAATTTCTTCCATTCTTGGGGCAGTCAATTTCATTTCAACAGTAATTAATATACGATCTACAGGAATTACCTTTGACCGTATACCATTATTTGTTTGAGCAGTAGCAATCACAGCCCTATTATTACTACTATCTCTTCCAGTATTAGCTGGAGCTATTACTATACTCCTAACAGACCGAAATCTTAACACATCCTTCTTTGACCCTGCTGGAGGAGGAGACCCAATTCTTTACCAACACTTATTT
>Corymbitodes_rubripennis_Japan_AB375513
AACACTATACTTCCTATTCGGGGCATGAGCAGGAATACTTGGAACATCCCTTAGACTTTTAATTCGAGCAGAATTAGGAAACCCTGGATCACTAATTGGAAATGATCAAATCTACAATGTAATTGTAACAGCACACGCTTTCATCATAATTTTCTTCATAGTTATACCAATCATAATCGGAGGCTTTGGAAACTGACTTGTACCTTTAATACTAGGAGCTCCTGATATAGCATTCCCACGAATAAATAATATAAGATTCTGATTCCTCCCTCCATCATTATCCCTACTATTAATAAGAAGAATTGTAGAAAATGGTGCAGGAACAGGATGAACGGTTTACCCTCCTCTATCAGCCAATATTGCCCACAGAGGTTCATCAGTTGATCTCGCAATCTTTAGACTCCACCTAGCTGGAATTTCTTCCATCCTAGGAGCAGTAAATTTCATTTCAACAGTAATTAATATACGATCTACAGGAATCACCTTTGACCGTATGCCTTTATTTGTTTGAGCAGTAGCAATCACAGCCCTATTACTACTACTATCTCTTCCAGTATTAGCTGGAGCCATTACTATACTACTAACAGACCGAAATCTTAACACATCCTTCTTTGAC------------------------------------------
>2781_Corymbitodes_sp_2_Ulju_GN
AACACTATACTTCCTATTTGGGGCATGGGCAGGAATACTTGGAACATCCCTTAGACTTCTGATTCGAGCAGAATTAGGAAACCCTGGATCACTAATTGGAAATGATCAAATCTACAATGTTATTGTAACAGCACATGCTTTCATTATAATTTTCTTCATAGTTATACCAATCATAATTGGAGGATTCGGAAATTGACTCGTACCTTTAATACTAGGGGCCCCTGACATAGCATTCCCACGTATAAATAACATGAGATTCTGGTTTCTTCCCCCATCATTATCACTACTATTAATAAGAAGAATTGTAGAAAATGGTGCAGGAACAGGATGAACTGTGTACCCCCCTCTCTCAGCCAATATTGCTCATAGAGGTTCATCAGTTGATCTCGCAATTTTCAGACTTCACCTAGCAGGAATCTCTTCCATCCTTGGAGCAGTAAATTTCATTTCTACAGTTATTAATATACGATCCACAGGAATCACTTTTGACCGAATACCTTTATTTGTATGAGCAGTAGCAATCACAGCCCTACTATTATTGCTATCCCTTCCAGTATTAGCAGGAGCTATTACTATACTCTTAACAGATCGAAATCTTAACACATCCTTCTTTGACCCTGCCGGAGGAGGAGACCCTATTCTATACCAACATTTATTT
>2787_Corymbitodes_sp_2_Danyang_CB
AACACTATACTTCCTATTTGGGGCATGGGCAGGAATACTTGGAACATCCCTTAGACTTCTGATTCGAGCAGAATTAGGAAACCCTGGATCACTAATTGGAAATGATCAAATCTACAATGTTATTGTAACAGCACATGCTTTCATTATAATTTTCTTCATAGTTATACCAATCATAATTGGAGGATTCGGAAATTGACTCGTACCTTTAATACTAGGGGCCCCTGACATAGCATTCCCACGTATAAATAACATGAGATTCTGGTTTCTTCCCCCATCATTATCACTACTATTAATAAGAAGAATTGTAGAAAATGGTGCAGGAACAGGATGAACTGTGTACCCCCCTCTCTCAGCCAATATTGCTCATAGAGGTTCATCAGTTGATCTCGCAATTTTCAGACTTCACCTAGCAGGAATCTCTTCCATCCTTGGAGCAGTAAATTTCATTTCTACAGTTATTAATATACGATCCACAGGAATCACTTTTGACCGAATACCTTTATTCGTATGAGCAGTAGCAATCACAGCCCTACTATTATTGCTATCCCTTCCAGTATTAGCAGGAGCTATTACTATACTCTTAACAGATCGAAATCTTAACACATCCTTCTTTGACCCTGCCGGAGGAGGAGACCCTATTCTATACCAACATTTATTT
>2788_Corymbitodes_sp_2_Danyang_CB
AACACTATACTTCCTATTTGGGGCATGGGCAGGAATACTTGGAACATCCCTTAGACTTCTGATTCGAGCAGAATTAGGAAACCCTGGATCACTAATTGGAAATGATCAAATCTACAATGTTATTGTAACAGCACATGCTTTCATTATAATTTTCTTCATAGTTATACCAATCATAATTGGAGGATTCGGAAATTGACTCGTACCTTTAATACTAGGGGCCCCTGACATAGCATTCCCACGTATAAATAACATGAGATTCTGGTTTCTTCCCCCATCATTATCACTACTATTAATAAGAAGAATTGTAGAAAATGGTGCAGGAACAGGATGAACTGTGTACCCCCCTCTCTCAGCCAATATTGCTCATAGAGGTTCATCAGTTGATCTCGCAATTTTCAGACTTCACCTAGCAGGAATCTCTTCCATCCTTGGAGCAGTAAATTTCATTTCTACAGTTATTAATATACGATCCACAGGAATCACTTTTGACCGAATACCTTTATTCGTATGAGCAGTAGCAATCACAGCCCTACTATTATTGCTATCCCTTCCAGTATTAGCAGGAGCTATTACTATACTCTTAACAGATCGAAATCTTAACACATCCTTCTTTGACCCTGCCGGAGGAGGAGACCCTATTCTATACCAACATTTATTT
>2790_Corymbitodes_sp_2_Yeongwol_GW
AACACTATACTTCCTATTTGGGGCATGGGCAGGAATACTTGGAACATCCCTTAGACTTCTGATTCGAGCAGAATTAGGAAACCCTGGATCACTAATTGGAAATGATCAAATCTACAATGTTATTGTAACAGCACATGCTTTCATTATAATTTTCTTCATAGTTATACCAATCATAATTGGAGGATTCGGAAATTGACTCGTACCTTTAATACTAGGGGCCCCTGACATAGCATTCCCACGTATAAATAACATGAGATTCTGGTTTCTTCCCCCATCATTATCACTACTATTAATAAGAAGAATTGTAGAAAATGGTGCAGGAACAGGATGAACTGTGTACCCCCCTCTCTCAGCCAATATTGCTCATAGAGGTTCATCAGTTGATCTCGCAATTTTCAGACTTCACCTAGCAGGAATCTCTTCCATCCTTGGAGCAGTAAATTTCATTTCTACAGTTATTAATATACGATCCACAGGAATCACTTTTGACCGAATACCTTTATTCGTATGAGCAGTAGCAATCACAGCCCTACTATTATTGCTATCCCTTCCAGTATTAGCAGGAGCTATTACTATACTCTTAACAGATCGAAATCTTAACACATCCTTCTTTGACCCTGCCGGAGGAGGAGACCCTATTCTATACCAACATTTATTT
>2791_Corymbitodes_sp_2_Yeongwol_GW
AACACTATACTTCCTATTTGGGGCATGGGCAGGAATACTTGGAACATCCCTTAGACTTCTGATTCGAGCAGAATTAGGAAACCCTGGATCACTAATTGGAAATGATCAAATCTACAATGTTATTGTAACAGCACATGCTTTCATTATAATTTTCTTCATAGTTATACCAATCATAATTGGAGGATTCGGAAATTGACTCGTACCTTTAATACTAGGGGCCCCTGACATAGCATTCCCACGTATAAACAATATGAGATTCTGGTTTCTTCCCCCATCATTATCACTACTATTAATAAGAAGAATTGTAGAAAATGGTGCAGGAACAGGATGAACTGTGTATCCCCCTCTCTCAGCCAATATTGCTCATAGAGGTTCATCAGTTGATCTCGCAATTTTCAGACTTCACCTAGCAGGAATCTCTTCCATCCTTGGAGCAGTGAATTTCATTTCTACAGTTATTAATATACGATCCACAGGAATCACTTTTGACCGAATACCTTTATTCGTATGAGCAGTAGCAATCACAGCCCTACTATTATTGCTATCCCTTCCAGTATTAGCAGGAGCTATTACTATACTCTTAACAGATCGAAATCTTAACACATCCTTCTTTGACCCTGCCGGAGGAGGAGACCCTATTCTATACCAACATTTATTT
>Corymbitodes_gratus_Japan_AB375512
AACACTATACTTCCTATTTGGGGCATGGGCAGGAATACTTGGAACATCCCTTAGACTTCTTATTCGAGCAGAATTAGGAAACCCTGGATCACTAATTGGTAATGATCAAATCTACAATGTTATTGTAACAGCACATGCTTTCATTATAATTTTCTTCATAGTTATACCAATCATAATTGGAGGATTTGGAAATTGACTTGTACCTTTAATACTAGGGGCCCCTGACATAGCATTCCCACGTATAAACAATATAAGATTCTGGTTTCTTCCCCCATCATTATCCCTCCTATTAATAAGAAGAATCGTAGAAAATGGGGCAGGAACAGGATGAACTGTGTACCCTCCTCTCTCAGCCAATATTGCTCACAGAGGTTCATCAGTTGATCTCGCAATTTTTAGACTTCACCTAGCAGGAATCTCTTCCATCCTTGGAGCAGTAAATTTCATTTCTACAGTTATTAATATACGATCCACAGGAATCACTTTTGACCGAATACCTTTATTTGTATGAGCAGTAGCAATTACAGCCTTACTATTATTATTATCCCTTCCAGTGTTAGCAGGAGCTATCACTATACTCTTAACAGATCGAAACCTTAATACATCCTTCTTTGAC------------------------------------------
>2138_Acteniceromorphus_selectus_Hokkaido_Japan
AACCCTATACTTTTTATTCGGAGCATGAGCCGGTATACTAGGTACATCCCTTAGACTTCTGATTCGAGCAGAATTAGGAAATCCTGGTTCATTAATTGGAAATGACCAAATCTATAATGTTATTGTAACAGCTCACGCTTTCATCATAATTTTCTTCATAGTAATACCAATTATAATTGGGGGATTCGGAAATTGACTTGTACCATTAATACTAGGAGCCCCTGATATAGCATTCCCACGTATAAACAATATAAGATTCTGATTCTTACCACCTTCACTATCTCTCCTTCTAATAAGAAGAATTGTAGAAAATGGTGCAGGTACAGGATGAACAGTCTACCCACCACTCTCAGCAAATATTGCTCATAGTGGGTCATCAGTTGATCTCGCAATTTTCAGACTTCATCTAGCTGGAATCTCCTCTATTCTAGGAGCAGTAAACTTCATCTCCACAGTTATTAATATACGGTCAACAGGAATTACATTTGATCGAATACCTTTATTTGTATGAGCAGTAGCAATTACTGCATTACTTCTATTGTTATCTCTCCCTGTATTAGCAGGAGCAATCACGATACTATTAACAGATCGAAATTTAAATACATCCTTCTTTGACCCGGCAGGAGGAGGAGACCCTATTCTGTACCAACATCTATTC
>2139_Acteniceromorphus_selectus_Hokkaido_Japan
AACCCTATACTTTTTATTCGGAGCATGAGCCGGTATACTAGGTACATCCCTTAGACTTCTGATTCGAGCAGAATTAGGAAATCCTGGTTCATTAATTGGAAATGACCAAATCTATAATGTTATTGTAACAGCTCACGCTTTCATCATAATTTTCTTCATAGTAATACCAATTATAATTGGGGGATTCGGAAATTGACTTGTACCATTAATACTAGGAGCCCCTGATATAGCATTCCCACGTATAAACAATATAAGATTCTGATTCTTACCACCTTCACTATCTCTCCTTCTAATAAGAAGAATTGTAGAAAATGGTGCAGGTACAGGATGAACAGTCTACCCACCACTCTCAGCAAATATTGCTCATAGTGGGTCATCAGTTGATCTCGCAATTTTCAGACTTCATCTAGCTGGAATCTCCTCTATTCTAGGAGCAGTAAACTTCATCTCCACAGTTATTAATATACGGTCAACAGGAATTACATTTGATCGAATACCTTTATTTGTATGAGCAGTAGCAATTACTGCATTACTTCTATTGTTATCTCTCCCTGTATTAGCAGGAGCAATCACGATACTATTAACAGATCGAAATTTAAATACATCCTTCTTTGACCCGGCAGGAGGAGGAGACCCTATTCTGTACCAACATCTATTC
>2141_Acteniceromorphus_selectus_Hokkaido_Japan
AACCCTATACTTTTTATTCGGAGCATGAGCCGGTATACTAGGTACATCCCTTAGACTTCTGATTCGAGCAGAATTAGGAAATCCTGGTTCATTAATTGGAAATGACCAAATCTATAATGTTATTGTAACAGCTCACGCTTTCATCATAATTTTCTTCATAGTAATACCAATTATAATTGGGGGATTCGGAAATTGACTTGTACCATTAATACTAGGAGCCCCTGATATAGCATTCCCACGTATAAACAATATAAGATTCTGATTCTTACCACCTTCACTATCTCTCCTTCTAATAAGAAGAATTGTAGAAAATGGTGCAGGTACAGGATGAACAGTCTACCCACCACTCTCAGCAAATATTGCTCATAGTGGGTCATCAGTTGATCTCGCAATTTTCAGACTTCATCTAGCTGGAATCTCCTCTATTCTAGGAGCAGTAAACTTCATCTCCACAGTTATTAATATACGGTCAACAGGAATTACATTTGATCGAATACCTTTATTTGTATGAGCAGTAGCAATTACTGCATTACTTCTATTGTTATCTCTCCCTGTATTAGCAGGAGCAATCACGATACTATTAACAGATCGAAATTTAAATACATCCTTCTTTGACCCGGCAGGAGGAGGAGACCCTATTCTGTACCAACATCTATTC
>2142_Acteniceromorphus_selectus_Hokkaido_Japan
AACCCTATACTTTTTATTCGGAGCATGAGCCGGTATACTAGGTACATCCCTTAGACTTCTGATTCGAGCAGAATTAGGAAATCCTGGTTCATTAATTGGAAATGACCAAATCTATAATGTTATTGTAACAGCTCACGCTTTCATCATAATTTTCTTCATAGTAATACCAATTATAATTGGGGGATTCGGAAATTGACTTGTACCATTAATACTAGGAGCCCCTGATATAGCATTCCCACGTATAAACAATATAAGATTCTGATTCTTACCACCTTCACTATCTCTCCTTCTAATAAGAAGAATTGTAGAAAATGGTGCAGGTACAGGATGAACAGTCTACCCACCACTCTCAGCAAATATTGCTCATAGTGGGTCATCAGTTGATCTCGCAATTTTCAGACTTCATCTAGCTGGAATCTCCTCTATTCTAGGAGCAGTAAACTTCATCTCCACAGTTATTAATATACGGTCAACAGGAATTACATTTGATCGAATACCTTTATTTGTATGAGCAGTAGCAATTACTGCATTACTTCTATTGTTATCTCTCCCTGTATTAGCAGGAGCAATCACGATACTATTAACAGATCGAAATTTAAATACATCCTTCTTTGACCCGGCAGGAGGAGGAGACCCTATTCTGTACCAACATCTATTC
>2143_Acteniceromorphus_selectus_Hokkaido_Japan
AACCCTATACTTTTTATTCGGAGCATGAGCCGGTATACTAGGTACATCCCTTAGACTTCTGATTCGAGCAGAATTAGGAAATCCTGGTTCATTAATTGGAAATGACCAAATCTATAATGTTATTGTAACAGCTCACGCTTTCATCATAATTTTCTTCATAGTAATACCAATTATAATTGGGGGATTCGGAAATTGACTTGTACCATTAATACTAGGAGCCCCTGATATAGCATTCCCACGTATAAACAATATAAGATTCTGATTCTTACCACCTTCACTATCTCTCCTTCTAATAAGAAGAATTGTAGAAAATGGTGCAGGTACAGGATGAACAGTCTACCCACCACTCTCAGCAAATATTGCTCATAGTGGGTCATCAGTTGATCTCGCAATTTTCAGACTTCATCTAGCTGGAATCTCCTCTATTCTAGGAGCAGTAAACTTCATCTCCACAGTTATTAATATACGGTCAACAGGAATTACATTTGATCGAATACCTTTATTTGTATGAGCAGTAGCAATTACTGCATTACTTCTATTGTTATCTCTCCCTGTATTAGCAGGAGCAATCACGATACTATTAACAGATCGAAATTTAAATACATCCTTCTTTGACCCGGCAGGAGGAGGAGACCCTATTCTGTACCAACATCTATTC
>2144_Acteniceromorphus_selectus_Hokkaido_Japan
AACCCTATACTTTTTATTCGGAGCATGAGCCGGTATACTAGGTACATCCCTTAGACTTCTGATTCGAGCAGAATTAGGAAATCCTGGTTCATTAATTGGAAATGACCAAATCTATAATGTTATTGTAACAGCTCACGCTTTCATCATAATTTTCTTCATAGTAATACCAATTATAATTGGGGGATTCGGAAATTGACTTGTACCATTAATACTAGGAGCCCCTGATATAGCATTCCCACGTATAAACAATATAAGATTCTGATTCTTACCACCTTCACTATCTCTCCTTCTAATAAGAAGAATTGTAGAAAATGGTGCAGGTACAGGATGAACAGTCTACCCACCACTCTCAGCAAATATTGCTCATAGTGGGTCATCAGTTGATCTCGCAATTTTCAGACTTCATCTAGCTGGAATCTCCTCTATTCTAGGAGCAGTAAACTTCATCTCCACAGTTATTAATATACGGTCAACAGGAATTACATTTGATCGAATACCTTTATTTGTATGAGCAGTAGCAATTACTGCATTACTTCTATTGTTATCTCTCCCTGTATTAGCAGGAGCAATCACGATACTATTAACAGATCGAAATTTAAATACATCCTTCTTTGACCCGGCAGGAGGAGGAGACCCTATTCTGTACCAACATCTATTC
>2145_Acteniceromorphus_selectus_Hokkaido_Japan
AACCCTATACTTTTTATTCGGAGCATGAGCCGGTATACTAGGTACATCCCTTAGACTTCTGATTCGAGCAGAATTAGGAAATCCTGGTTCATTAATTGGAAATGACCAAATCTATAATGTTATTGTAACAGCTCACGCTTTCATCATAATTTTCTTCATAGTAATACCAATTATAATTGGGGGATTCGGAAATTGACTTGTACCATTAATACTAGGAGCCCCTGATATAGCATTCCCACGTATAAACAATATAAGATTCTGATTCTTACCACCTTCACTATCTCTCCTTCTAATAAGAAGAATTGTAGAAAATGGTGCAGGTACAGGATGAACAGTCTACCCACCACTCTCAGCAAATATTGCTCATAGTGGGTCATCAGTTGATCTCGCAATTTTCAGACTTCATCTAGCTGGAATCTCCTCTATTCTAGGAGCAGTAAACTTCATCTCCACAGTTATTAATATACGGTCAACAGGAATTACATTTGATCGAATACCTTTATTTGTATGAGCAGTAGCAATTACTGCATTACTTCTATTGTTATCTCTCCCTGTATTAGCAGGAGCAATCACGATACTATTAACAGATCGAAATTTAAATACATCCTTCTTTGACCCGGCAGGAGGAGGAGACCCTATTCTGTACCAACATCTATTC
>2160_Acteniceromorphus_selectus_Hokkaido_Japan
AACCCTATACTTTTTATTCGGAGCATGAGCCGGTATACTAGGTACATCCCTTAGACTTCTGATTCGAGCAGAATTAGGAAATCCTGGTTCATTAATTGGAAATGACCAAATCTATAATGTTATTGTAACAGCTCACGCTTTCATCATAATTTTCTTCATAGTAATACCAATTATAATTGGGGGATTCGGAAATTGACTTGTACCATTAATACTAGGAGCCCCTGATATAGCATTCCCACGTATAAACAATATAAGATTCTGATTCTTACCACCTTCACTATCTCTCCTTCTAATAAGAAGAATTGTAGAAAATGGTGCAGGTACAGGATGAACAGTCTACCCACCACTCTCAGCAAATATTGCTCATAGTGGGTCATCAGTTGATCTCGCAATTTTCAGACTTCATCTAGCTGGAATCTCCTCTATTCTAGGAGCAGTAAACTTCATCTCCACAGTTATTAATATACGGTCAACAGGAATTACATTTGATCGAATACCTTTATTTGTATGAGCAGTAGCAATTACTGCATTACTTCTATTGTTATCTCTCCCTGTATTAGCAGGAGCAATCACGATACTATTAACAGATCGAAATTTAAATACATCCTTCTTTGACCCGGCAGGAGGAGGAGACCCTATTCTGTACCAACATCTATTC
>885_Acteniceromorphus_ferrugineipennis_Mt_Odae_GW
AACCCTCTACTTCCTATTCGGAGCATGAGCCGGAATACTAGGAACATCCCTTAGACTTCTGATTCGAGCAGAATTAGGAAACCCTGGTTCACTAATCGGAAATGACCAAATCTACAATGTTATTGTAACAGCACACGCTTTCATCATAATTTTCTTCATAGTAATACCAATTATAATTGGAGGATTCGGAAACTGACTTGTACCTTTAATACTAGGGGCCCCTGATATAGCATTCCCACGTATAAACAATATAAGATTCTGGTTTCTTCCACCTTCTCTATCTCTCCTTTTAATAAGAAGAATTGTAGAAAATGGGGCAGGAACAGGATGAACAGTTTATCCTCCACTCTCAGCAAATATTGCACACAGAGGATCATCAGTTGATCTCGCAATTTTTAGCCTCCACCTGGCTGGGATCTCCTCTATTCTAGGAGCAGTAAATTTTATCTCTACTGTTATTAACATACGATCAACAGGAATTACATTTGATCGAATACCCTTATTTGTATGAGCAGTAGCAATTACTGCATTACTTTTACTTCTATCTCTACCTGTATTAGCAGGAGCAATTACAATACTTTTAACAGACCGAAATCTAAATACATCCTTCTTTGACCCTGCAGGAGGTGGTGACCCAATCCTGTACCAACATCTATTC
>2811_Acteniceromorphus_ferrugineipennis_Mt_Odae_GW
AACCCTCTACTTCCTATTCGGAGCATGAGCCGGAATACTAGGAACATCCCTTAGACTTCTGATTCGAGCAGAATTAGGAAACCCTGGTTCACTAATCGGAAATGACCAAATCTACAATGTTATTGTAACAGCACACGCTTTCATCATAATTTTCTTCATAGTAATACCAATTATAATTGGAGGATTCGGAAACTGACTTGTACCTTTAATACTAGGGGCCCCTGATATAGCATTCCCACGTATAAACAATATAAGATTCTGGTTTCTTCCACCTTCTCTATCTCTCCTTTTAATAAGAAGAATTGTAGAAAATGGGGCAGGAACAGGATGAACAGTTTATCCCCCACTCTCAGCAAATATTGCACACAGAGGGTCATCAGTTGATCTCGCAATTTTTAGTCTCCACCTGGCTGGAATCTCCTCTATTCTAGGAGCAGTAAATTTTATCTCTACTGTTATTAACATACGATCAACAGGAATTACATTTGATCGAATACCCTTATTTGTATGAGCAGTAGCAATTACTGCATTACTTTTACTTCTATCTCTACCTGTATTAGCAGGAGCAATTACAATACTTTTAACAGACCGAAATCTAAATACATCCTTCTTTGACCCTGCAGGAGGTGGTGACCCAATCCTGTACCAACATCTATTC
>Acteniceromorphus_kurofunei_Japan_AB375511
AACCTTATACTTCCTATTCGGAGCATGAGCAGGAATACTAGGAACATCCCTTAGACTTCTGATTCGAGCAGAATTAGGTAACCCTGGTTCATTAATTGGAAATGACCAAATCTACAATGTTATTGTAACAGCACACGCTTTCATCATAATTTTCTTCATAGTAATACCAATTATAATTGGAGGATTCGGAAACTGGCTAGTACCATTAATACTAGGAGCCCCTGATATAGCATTTCCACGTATAAACAACATAAGATTCTGGTTTCTACCACCTTCCCTATCTCTCTTACTAATAAGAAGAATTGTAGAAAATGGTGCTGGTACAGGATGAACAGTCTACCCTCCTCTTTCAGCAAATATTGCTCATAGAGGGTCATCAGTTGATCTCGCAATTTTCAGTCTCCATCTGGCTGGAATCTCTTCCATTCTAGGAGCAGTAAACTTCATCTCTACAGTTATTAATATACGATCAACGGGTATTACATTTGATCGTATACCTTTATTTGTATGGGCAGTAGCAATTACTGCATTGCTACTATTGTTATCACTCCCTGTACTAGCAGGAGCAATTACTATACTATTAACAGATCGAAATTTAAATACATCCTTCTTTGAC------------------------------------------
>2307_Liotrichus_ligneus_Mt_Odae_GW
AACCTTATACTTTCTATTTGGAGCATGGGCAGGAATACTAGGAACCTCCCTAAGACTTCTAATCCGTGCAGAACTTGGTAACCCCGGGTCACTAATTGGAAATGACCAGATCTATAATGTTATTGTTACAGCCCATGCTTTTATTATGATTTTCTTTATAGTTATGCCAATTATGATTGGAGGATTCGGAAACTGATTAGTCCCTTTAATACTAGGAGCGCCAGACATGGCCTTCCCTCGAATAAACAATATAAGATTCTGGTTTCTTCCTCCATCCTTATCCCTTCTATTAATAAGTAGAATCGTAGAAAATGGAGCTGGAACAGGATGAACAGTTTACCCTCCTTTATCAGCAAATATTGCCCATAGAGGATCATCTGTTGACCTTGCTATTTTTAGACTCCACCTAGCAGGAATCTCGTCTATTCTTGGAGCTGTGAATTTTATCTCAACAGTTATCAATATACGATCAACAGGAATCACATTTGACCGCATACCTTTATTTGTATGAGCAGTAGCAATCACAGCCCTACTTTTATTATTATCCTTACCAGTTCTTGCTGGAGCTATCACCATACTCCTTACAGATCGAAATCTAAACACATCCTTTTTTGACCCAGCAGGAGGAGGAGACCCAATCCTTTATCAACACCTATTC
>2812_Liotrichus_ligneus_Mt_Odae_GW
AACCTTATACTTTCTATTTGGAGCATGGGCAGGAATACTAGGAACCTCCCTAAGACTTCTAATCCGTGCAGAACTTGGtAACCCCGGGTCACTAATTGGAAATGACCAgATCTATAATGTTATTGTTACAGCCCATGCTTTTATTATGATTTTCTTTATAGTTATGCCAATTATGATTGGAGGATTCGGAAACTGATTAGTCCCTTTAATACTAGGAGCgCCaGACATGGCCTTCCCTCGAATAAACAATATAAGATTCTGGTTTCTTCCTCCATCCTTATCCCTTCTATTAATAAGtAGAATCGTAGAAAATGGAGCTGGAACAGGATGAACAGTTTACCCTCCTTTATCAGCAAATATTGCCCATAGAGGATCATCTGTTGACCTTGCTATTTTTAGACTCCACCTAGCAGGAATCTCGTCTATTCTTGGAGCTGTGAATTTTATCTCAACAGTTATCAATATACGATCAACAGGAATCACATTTGACCGCATACCTTTATTTGTATGAGCAGTAGCAATCACAGCCCTACTTTTATTATTATCCTTACCAGTTCTTGCTGGAGCTATCACCATACTCCTTACAGATCGAAATCTAAACACATCCTTTTTTGACCCAGCAGGAGGAGGAGACCCTATCCTTTATCAACACCTATTC
>869_Aplotarsus_imperceptus_Hongcheon_GW
AACATTATATTTCTTATTCGGGGCATGAGCCGGAATACTAGGAACCTCTCTTAGACTTCTAATCCGAGCAGAATTAGGGAATCCTGGATCACTAATTGGAAATGACCAAATTTATAACGTTATTGTAACAGCACATGCTTTCATTATAATTTTCTTCATAGTTATACCCATTATAATCGGGGGATTCGGAAACTGACTTGTACCCCTAATACTAGGGGCTCCTGATATAGCATTCCCACGAATAAACAATATAAGATTCTGATTCCTTCCTCCTTCTTTGACCCTCCTTCTAATAAGAAGAATTGTTGAAAGTGGGGCAGGAACAGGATGAACTGTTTATCCCCCTCTTTCAGCAAATATTGCCCATAGAGGCTCATCAGTCGATCTTGCAATTTTTAGGCTACATCTGGCTGGAATTTCTTCCATCTTAGGCGCAGTAAACTTTATCTCTACAGTTATTAATATACGATCAACAGGAATTACCTTTGATCGAATACCACTATTTGTTTGGGCAGTGGCAATCACAGCTTTACTACTCCTTCTGTCCCTCCCAGTACTAGCAGGAGCCATCACCATACTACTAACAGACCGAAACCTTAATACTTCCTTCTTTGACCCTGTTGGAGGAGGGGACCCCATTCTTTATCAACATTTATTC
>871_Aplotarsus_imperceptus_Hongcheon_GW
AACATTATATTTCTTATTCGGGGCATGAGCCGGAATACTAGGAACCTCTCTTAGACTTCTAATCCGAGCAGAATTAGGGAATCCTGGATCACTAATTGGAAATGACCAAATTTATAACGTTATTGTAACAGCACATGCTTTCATTATAATTTTCTTCATAGTTATACCCATTATAATCGGGGGATTCGGAAACTGACTTGTACCCCTAATACTAGGGGCTCCTGATATAGCATTCCCACGAATAAACAATATAAGATTCTGATTCCTTCCTCCTTCTTTGACCCTCCTTCTAATAAGAAGAATTGTTGAAAGTGGGGCAGGAACAGGATGAACTGTTTATCCCCCTCTTTCAGCAAATATTGCCCATAGAGGCTCATCAGTCGATCTTGCAATTTTTAGGCTACATCTGGCTGGAATTTCTTCCATCTTAGGCGCAGTAAACTTTATCTCTACAGTTATTAATATACGATCAACAGGAATTACCTTTGATCGAATACCACTATTTGTTTGGGCAGTGGCAATCACAGCTTTACTACTCCTTCTGTCCCTCCCAGTACTAGCAGGAGCCATCACCATACTACTAACAGACCGAAACCTTAATACTTCCTTCTTTGACCCTGTTGGAGGAGGGGACCCCATTCTTTATCAACATTTATTC
>2241_Aplotarsus_imperceptus_Mt_Odae_GW
AACATTATATTTCTTATTCGGGGCATGAGCCGGAATACTAGGAACCTCTCTTAGACTTCTAATCCGAGCAGAATTAGGGAATCCTGGATCACTAATTGGAAATGACCAAATTTATAACGTTATTGTAACAGCACATGCTTTCATTATAATTTTCTTCATAGTTATACCCATTATAATCGGGGGATTCGGAAACTGACTTGTACCCCTAATACTAGGGGCTCCTGATATAGCATTCCCACGAATAAACAATATAAGATTCTGATTCCTTCCTCCTTCTTTGACCCTCCTTCTAATAAGAAGAATTGTTGAAAGTGGGGCAGGAACAGGATGAACTGTTTATCCCCCTCTTTCAGCAAATATTGCCCATAGAGGCTCATCAGTCGATCTTGCAATTTTTAGGCTACATCTGGCTGGAATTTCTTCCATCTTAGGCGCAGTAAACTTTATCTCTACAGTTATTAATATACGATCAACAGGAATTACCTTTGATCGAATACCACTATTTGTTTGGGCAGTGGCAATCACAGCTTTACTACTCCTTCTGTCCCTCCCAGTACTAGCAGGAGCCATCACCATACTACTAACAGACCGAAACCTTAATACTTCCTTCTTTGACCCTGTTGGAGGAGGGGACCCCATTCTTTATCAACATTTATTC
>2242_Aplotarsus_imperceptus_Mt_Odae_GW
AACATTATATTTCTTATTCGGGGCATGAGCCGGAATACTAGGAACCTCTCTTAGACTTCTAATCCGAGCAGAATTAGGGAATCCTGGATCACTAATTGGAAATGACCAAATTTATAACGTTATTGTAACAGCACATGCTTTCATTATAATTTTCTTCATAGTTATACCCATTATAATCGGGGGATTCGGAAACTGACTTGTACCCCTAATACTAGGGGCTCCTGATATAGCATTCCCACGAATAAACAATATAAGATTCTGATTCCTTCCTCCTTCTTTGACCCTCCTTCTAATAAGAAGAATTGTTGAAAGTGGGGCAGGAACAGGATGAACTGTTTATCCCCCTCTTTCAGCAAATATTGCCCATAGAGGCTCATCAGTCGATCTTGCAATTTTTAGGCTACATCTGGCTGGAATTTCTTCCATCTTAGGCGCAGTAAACTTTATCTCTACAGTTATTAATATACGATCAACAGGAATTACCTTTGATCGAATACCACTATTTGTTTGGGCAGTGGCAATCACAGCTTTACTACTCCTTCTGTCCCTCCCAGTACTAGCAGGAGCCATCACCATACTACTAACAGACCGAAACCTTAATACTTCCTTCTTTGACCCTGTTGGAGGAGGGGACCCCATTCTTTATCAACATTTATTC
>2243_Aplotarsus_imperceptus_Mt_Odae_GW
AACATTATATTTCTTATTCGGGGCATGAGCCGGAATACTAGGAACCTCTCTTAGACTTCTAATCCGAGCAGAATTAGGGAATCCTGGATCACTAATTGGAAATGACCAAATTTATAACGTTATTGTAACAGCACATGCTTTCATTATAATTTTCTTCATAGTTATACCCATTATAATCGGGGGATTCGGAAACTGACTTGTACCCCTAATACTAGGGGCTCCTGATATAGCATTCCCACGAATAAACAATATAAGATTCTGATTCCTTCCTCCTTCTTTGACCCTCCTTCTAATAAGAAGAATTGTTGAAAGTGGGGCAGGAACAGGATGAACTGTTTATCCCCCTCTTTCAGCAAATATTGCCCATAGAGGCTCATCAGTCGATCTTGCAATTTTTAGGCTACATCTGGCTGGAATTTCTTCCATCTTAGGCGCAGTAAACTTTATCTCTACAGTTATTAATATACGATCAACAGGAATTACCTTTGATCGAATACCACTATTTGTTTGGGCAGTGGCAATCACAGCTTTACTACTCCTTCTGTCCCTCCCAGTACTAGCAGGAGCCATCACCATACTACTAACAGACCGAAATCTTAATACTTCCTTCTTTGACCCTGTTGGAGGAGGGGACCCCATTCTTTATCAACATTTATTC
>2308_Aplotarsus_imperceptus_Mt_Odae_GW
AACATTATATTTCTTATTCGGGGCATGAGCCGGAATACTAGGAACCTCTCTTAGACTTCTAATCCGAGCAGAATTAGGGAATCCTGGATCACTAATTGGAAATGACCAAATTTATAACGTTATTGTAACAGCACATGCTTTCATTATAATTTTCTTCATAGTTATACCCATTATAATCGGGGGATTCGGAAACTGACTTGTACCCTTAATACTAGGGGCTCCTGATATAGCATTCCCACGAATAAACAATATAAGATTCTGATTCCTTCCTCCTTCTTTGACCCTCCTTCTAATAAGAAGAATTGTTGAAAGTGGGGCAGGAACAGGATGAACTGTTTATCCCCCTCTTTCAGCAAATATTGCCCATAGAGGCTCATCAGTCGATCTTGCAATTTTTAGGCTACATCTGGCTGGAATTTCTTCCATCTTAGGCGCAGTAAACTTTATCTCTACAGTTATTAATATGCGATCAACAGGAATTACCTTTGATCGAATACCACTATTTGTTTGGGCAGTAGCAATCACAGCTTTACTACTCCTTCTGTCCCTCCCAGTACTAGCAGGAGCCATCACCATACTACTAACAGACCGAAATCTTAATACTTCCTTCTTTGACCCTGTTGGAGGAGGGGACCCCATTCTTTATCAACATTTATTC
>2699_Aplotarsus_imperceptus_Mt_Hwaya_GG
AACATTATATTTCTTATTCGGGGCATGAGCCGGAATACTAGGAACCTCTCTTAGACTTCTAATCCGAGCAGAATTAGGGAATCCTGGATCACTAATTGGAAATGACCAAATTTATAACGTTATTGTAACAGCACATGCTTTCATTATAATTTTCTTCATAGTTATACCCATTATAATCGGGGGATTCGGAAACTGACTTGTACCCCTAATACTAGGGGCTCCTGATATAGCATTCCCACGAATAAACAATATAAGATTCTGATTCCTTCCTCCTTCTTTGACCCTCCTTCTAATAAGAAGAATTGTTGAAAGTGGGGCAGGAACAGGATGAACTGTTTATCCCCCTCTTTCAGCAAATATTGCCCATAGAGGCTCATCAGTCGATCTTGCAATTTTTAGGCTACATCTGGCTGGAATTTCTTCCATCTTAGGCGCAGTAAACTTTATCTCTACAGTTATTAATATACGATCAACAGGAATTACCTTTGATCGAATACCACTATTTGTTTGGGCAGTGGCAATCACAGCTTTACTACTCCTTCTGTCCCTCCCAGTACTAGCAGGAGCCATCACCATACTACTAACAGACCGAAACCTTAATACTTCCTTCTTTGACCCTGTTGGAGGAGGGGACCCCATTCTTTATCAACATTTATTC
>2816_Aplotarsus_imperceptus_Mt_Odae_GW
AACATTATATTTCTTATTCGGGGCATGAGCCGGAATACTAGGAACCTCTCTTAGACTTCTAATCCGAGCAGAATTAGGGAATCCTGGATCACTAATTGGAAATGACCAAATTTATAACGTTATTGTAACAGCACATGCTTTCATTATAATTTTCTTCATAGTTATACCCATTATAATCGGGGGATTCGGAAACTGACTTGTACCCTTAATACTAGGGGCTCCTGATATAGCATTCCCACGAATAAACAATATAAGATTCTGATTCCTTCCTCCTTCTTTGACCCTCCTTCTAATAAGAAGAATTGTTGAAAGTGGGGCAGGAACAGGATGAACTGTTTATCCCCCTCTTTCAGCAAATATTGCCCATAGAGGCTCATCAGTCGATCTTGCAATTTTTAGGCTACATCTGGCTGGAATTTCTTCCATCTTAGGCGCAGTAAACTTTATCTCTACAGTTATTAATATACGATCAACAGGAATTACCTTTGATCGAATACCACTATTTGTTTGGGCAGTAGCAATCACAGCTTTACTACTCCTTCTGTCCCTCCCAGTACTAGCAGGAGCCATCACCATACTACTAACAGACCGAAATCTTAATACTTCCTTCTTTGACCCTGTTGGAGGAGGGGACCCCATTCTTTATCAACATTTATTC
>2836_Aplotarsus_imperceptus_Mt_Seolak_GW
AACATTATATTTCTTATTCGGGGCATGAGCCGGAATACTAGGAACCTCTCTTAGACTTCTAATCCGAGCAGAATTAGGGAATCCTGGATCACTAATTGGAAATGACCAAATTTATAACGTTATTGTAACAGCACATGCTTTCATTATAATTTTCTTCATAGTTATACCCATTATAATCGGGGGATTCGGAAACTGACTTGTACCCCTAATACTAGGGGCTCCTGATATAGCATTCCCACGAATAAACAATATAAGATTCTGATTCCTTCCTCCTTCTTTGACCCTCCTTCTAATAAGAAGAATTGTTGAAAGTGGGGCAGGAACAGGATGAACTGTTTATCCCCCTCTTTCAGCAAATATTGCCCATAGAGGCTCATCAGTCGATCTTGCAATTTTTAGGCTACATCTGGCTGGAATTTCTTCCATCTTAGGCGCAGTAAACTTTATCTCTACAGTTATTAATATACGATCAACAGGAATTACCTTTGATCGAATACCACTATTTGTTTGGGCAGTGGCAATCACAGCTTTACTACTCCTTCTGTCCCTCCCAGTACTAGCAGGAGCCATCACCATACTACTAACAGACCGAAACCTTAATACTTCCTTCTTTGACCCTGTTGGAGGAGGGGACCCCATTCTTTATCAACATTTATTC
>3023_Aplotarsus_imperceptus_Namyangju_GG
AACATTATATTTCTTATTCGGGGCATGAGCCGGAATACTAGGAACCTCTCTTAGACTTCTAATCCGAGCAGAATTAGGGAATCCTGGATCACTAATTGGAAATGACCAAATTTATAACGTTATTGTAACAGCACATGCTTTCATTATAATTTTCTTCATAGTTATACCCATTATAATCGGGGGATTCGGAAACTGACTTGTACCCCTAATACTAGGGGCTCCTGATATAGCATTCCCACGAATAAACAATATAAGATTCTGATTCCTTCCTCCTTCTTTGACCCTCCTTCTAATAAGAAGAATTGTTGAAAGTGGGGCAGGAACAGGATGAACTGTTTATCCCCCTCTTTCAGCAAATATTGCCCATAGAGGCTCATCAGTCGATCTTGCAATTTTTAGGCTACATCTGGCTGGAATTTCTTCCATCTTAGGCGCAGTAAACTTTATCTCTACAGTTATTAATATACGATCAACAGGAATTACCTTTGATCGAATACCACTATTTGTTTGGGCAGTGGCAATCACAGCTTTACTACTCCTTCTGTCCCTCCCAGTACTAGCAGGAGCCATCACCATACTACTAACAGACCGAAACCTTAATACTTCCTTCTTTGACCCTGTTGGAGGAGGGGACCCCATTCTTTATCAACATTTATTC
>801_Ctenicera_pectinicornis_Russia
AACATTATATTTCTTATTTGGGGCCTGGGCAGGAATGCTAGGAACCTCTTTAAGTCTACTAATTCGTGCTGAATTAGGAAATCCGGGGTCACTTATTGGTAATGATCAAATTTATAATGTTATTGTTACCGCTCACGCCTTTATCATAATTTTCTTTATAGTTATACCAATCATAATTGGAGGATTCGGAAATTGACTAGTTCCATTAATACTTGGAGCCCCTGACATAGCTTTCCCACGAATGAATAATATAAGATTTTGGTTTCTCCCTCCCTCTTTAAGCCTTCTATTAATAAGAAGAATTGTAGAAAACGGGGCCGGTACAGGATGAACTGTTTACCCCCCCCTTTCTGCTAATATCGCCCACAGAGGCTCTTCCGTTGATCTAGCAATTTTTAGGCTCCACCTGGCTGGAATTTCTTCAATTCTTGGCGCCGTAAACTTTATTTCTACAGTAATCAATATACGATCAACAGGAATTACATTTGATCGTATGCCTCTTTTTGTCTGGGCCGTAGCAATTACAGCGCTTCTGCTTCTACTATCCCTCCCGGTACTTGCAGGAGCAATCACTATACTTTTAACAGACCGTAACCTTAATACTTCATTCTTTGACCCCGCAGGAGGGGGTGATCCAATTCTTTACCAACATTTATTC
>3481_Ctenicera_pectenicornis_E_Russia
AACATTATATTTCTTATTTGGGGCCTGGGCAGGAATGCTAGGAACCTCTTTAAGTCTACTAATTCGTGCTGAATTAGGAAATCCGGGGTCACTTATTGGTAATGATCAAATTTATAATGTTATTGTTACCGCTCACGCCTTTATCATAATTTTCTTTATAGTTATACCAATCATAATTGGAGGATTCGGAAATTGACTAGTTCCATTAATACTTGGAGCCCCTGACATAGCTTTCCCACGAATGAATAATATAAGATTTTGGTTTCTCCCTCCCTCTTTAAGCCTTCTATTAATAAGAAGAATTGTAGAAAACGGGGCCGGTACAGGATGAACTGTTTACCCTCCCCTTTCTGCTAATATCGCCCACAGAGGCTCTTCCGTTGATCTAGCAATTTTTAGGCTCCACCTGGCTGGAATTTCTTCAATTCTTGGCGCCGTAAACTTTATTTCTACAGTAATCAATATACGATCAACAGGAATTACATTTGATCGTATGCCTCTTTTTGTCTGGGCCGTAGCAATTACAGCGCTTCTGCTTCTACTATCCCTCCCGGTACTTGCAGGAGCAATCACTATACTTTTAACAGACCGTAACCTTAATACTTCATTCTTTGACCCCGCAGGAGGGGGTGATCCAATTCTTTACCAACATTTATTC
>3482_Ctenicera_pectenicornis_NW_Russia
AACATTATATTTCTTATTTGGGGCCTGAGCAGGAATGCTAGGAACCTCTTTAAGTCTACTAATTCGTGCTGAATTAGGAAATCCGGGATCACTTATTGGTAATGATCAAATTTATAATGTTATTGTTACCGCTCACGCCTTTATCATAATTTTCTTTATAGTTATACCAATCATAATTGGAGGATTCGGAAATTGACTAGTTCCATTAATACTTGGAGCCCCTGACATAGCTTTCCCACGAATGAATAATATAAGATTTTGGTTTCTCCCTCCCTCTTTAAGCCTTCTATTAATAAGAAGAATTGTAGAAAACGGGGCCGGTACAGGATGAACTGTTTACCCTCCCCTTTCTGCTAATATCGCCCACAGAGGCTCTTCTGTTGATCTAGCAATTTTTAGGCTCCACCTGGCTGGAATTTCTTCAATTCTGGGCGCCGTAAACTTTATTTCTACAGTAATCAATATACGATCAACAGGAATTACATTTGATCGTATGCCTCTTTTTGTCTGGGCCGTAGCAATTACAGCGCTTCTGCTTCTACTATCCCTCCCGGTACTTGCAGGAGCAATCACTATACTTTTAACAGACCGTAACCTTAATACTTCATTCTTTGACCCCGCAGGAGGGGGTGATCCAATTCTTTACCAACATTTATTC
>3483_Ctenicera_pectenicornis_NW_Russia
AACATTATATTTCTTATTTGGGGCCTGGGCAGGAATGCTAGGAACCTCTTTAAGTCTACTAATTCGTGCTGAATTAGGAAATCCGGGGTCACTTATTGGTAATGATCAAATTTATAATGTTATTGTTACCGCTCACGCCTTTATCATAATTTTCTTTATAGTTATACCAATCATAATTGGAGGATTCGGAAATTGACTAGTTCCATTAATACTTGGAGCCCCTGACATAGCTTTCCCACGAATGAATAATATAAGATTTTGGTTTCTCCCTCCCTCTTTAAGCCTTCTATTAATAAGAAGAATTGTAGAAAACGGGGCCGGTACAGGATGAACTGTTTACCCTCCCCTTTCTGCTAATATCGCCCACAGAGGCTCTTCCGTTGATCTAGCAATTTTTAGGCTCCACCTGGCTGGAATTTCTTCAATTCTTGGCGCCGTAAACTTTATTTCTACAGTAATCAATATACGATCAACAGGAATTACATTTGATCGTATGCCTCTTTTTGTCTGGGCCGTAGCAATTACAGCGCTTCTGCTTCTACTATCCCTCCCGGTACTTGCAGGAGCAATCACTATACTTTTAACAGACCGTAACCTTAATACTTCATTCTTTGACCCCGCAGGAGGGGGTGATCCAATTCTTTACCAACATTTATTC
>3484_Ctenicera_pectenicornis_NW_Russia
--------------------------------------------------------------------------------------------------------------TTTATAATGTTATTGTTACCGCCCACGCCTTTATCATAATTTTCTTTATAGTTATACCAATCATAATTGGAGGATTCGGAAATTGACTAGTTCCCTTAATACTTGGAGCCCCTGACATAGCTTTCCCCCCAATGAATAATATAAGATTTTGGTTTCTCCCTCCCTCTTTAAGCCTTCTATTAATAAGAAGAATTGTAGAAAACGGAGCCGGGACAGGATGAACTGTTTACCCTCCCCTTTCTGCTAATATCGCCCACAGAGGCTCTTCTGTTGATCTAGCAATTTTTAGGCTCCACCTGGCTGGAATTTCTTCAATTCTTGGCGCCGTAAACTTTATTTCTACAGTAATCAATATACGATCAACAGGAATTACATTTGATCGTATGCCTCTTTTTGTCTGGGCCGTAGCAATTACAGCGCTTCTGCTTCTACTATCCCTCCCGGTACTTGCAGGAGCAATCACTATACTTTTAACAGACCGTAACCTTAATACTTCATTCTTTGACCCCGCAGGAGGGGGTGATCCAATTCTTTACCAACATTTATTC
>Ctenicera_mediana_Canada_AY165675
-------------------GGAGCATGATCCGGAATACTAGGAACCTCATTAAGATTATTAATCCGGGCAGAACTAGGAAACCCAGGATCATTAATCGGAAACGACCAAATCTACAACGTTATTGTAACAGCACACGCTTTCATCATAATTTTCTTCATAGTTATGCCAATCATAATTGGAGGATTTGGAAATTGACTAGTACCCCTAATACTAGGAGCACCTGATATAGCATTCCCACGAATAAATAATATAAGATTCTGATTTTTACCACCATCATTATCTTTACTATTAATAAGAAGAATCGTAGAAAATGGGGCAGGGACAGGTTGAACAGTTTATCCCCCTCTTTCAGCAAATATTGCCCACAGTGGATCTTCAGTTGATCTTGCCATTTTCAGTCTACACCTAGCAGGAATCTCATCAATCTTAGGAGCAGTAAACTTCATCTCAACTGTAATTAATATACGAACAACAGGAATTACCTTTGACCGAATACCACTATTTGTATGAGCAGTAGCAATTACAGCCCTTCTATTATTACTATCACTACCAGTACTAGCTGGAGCAATCACAATATTATTAACTGACCGAAATCTAAACACATCATTTTTCGACCCTGCAGGAGGAGGAGATCCAATTCTA---------------
>3516_Neopristilophus_insitivus_Czech
AACTCTGTACTTCCTATTTGGAGCTTGGGCAGGGATATTAGGAACTTCCCTTAGACTTCTAATCCGAGCAGAACTTGGAAACCCTGGATCATTAATTGGAAATGACCAAATTTACAACGTAATTGTTACTGCCCATGCATTCATTATAATTTTCTTTATAGTTATACCAATCATAATTGGAGGGTTTGGAAACTGACTAGTACCCCTTATACTAGGAGCCCCTGACATAGCATTCCCCCGAATAAACAACATAAGTTTCTGGTTTCTTCCACCTTCTCTTTCCCTTCTCCTAATAAGAAGAATTGTTGAAAATGGAGCAGGTACAGGTTGAACTGTTTACCCACCTCTGTCAGCAAACATTGCTCATAGAGGTTCATCAGTAGACTTAGCTATTTTCAGACTTCACCTAGCAGGAATTTCATCAATTCTAGGAGCAGTAAACTTCATCTCAACAGTAATTAATATGCGATCCACAGGAATCACCTTTGATCGTATACCCCTGTTTGTATGAGCAGTAGCAATTACAGCCCTTCTCCTTCTTTTATCACTACCAGTTCTAGCCGGTGCAATTACTATACTATTAACTGATCGTAACCTTAATACTTCATTCTTTGACCCAGCCGGCGGAGGTGACCCAATTCTATACCAGCATCTATTC
>738_Ctenicerini_gen_and_sp_1_Namhae_JN
AACCCTTTACTTCCTATTCGGAGCTTGATCCGGAATACTAGGAACCTCCTTAAGATTATTAATTCGAGCAGAATTAGGAAATCCAGGATCTCTAATCGGAAATGATCAAATCTACAACGTAATTGTTACAGCTCACGCTTTCATTATAATTTTCTTTATAGTAATACCTATCATAATTGGAGGATTTGGAAACTGGTTAGTACCCCTTATACTAGGAGCTCCTGATATAGCATTCCCTCGAATAAACAACATAAGATTTTGGTTTCTACCTCCTTCCTTATCATTATTATTAATAAGAAGAATTGTAGAAAATGGTGCAGGAACAGGTTGAACTGTGTACCCCCCTCTTTCAGCTAACATTGCCCATAGAGGATCCTCAGTTGATCTTGCAATTTTCAGGCTACACTTAGCAGGAATTTCCTCAATTTTAGGAGCAGTCAATTTCATTTCAACAGTAATTAATATACGATCAACAGGAATCACATTTGATCGAATACCTTTATTTGTATGAGCTGTAgCAATTACAGCCCTTTTACTACTTCTGTCCCTCCCAGTATTAGCAGGAGCAATTACAATATTATTAACGGATCGAAACCTAAACACATCATTCTTTGACCCCGCAGGAGGCGGTGACCCTATCTTATACCAACACCTATTC
>739_Ctenicerini_gen_and_sp_1_Namhae_JN
AACCCTTTACTTCCTATTCGGAGCTTGATCCGGAATACTAGGAACCTCCTTAAGACTATTAATTCGAGCAGAATTAGGAAATCCAGGATCTCTAATCGGAAATGATCAAATCTACAACGTAATTGTTACAGCTCACGCTTTCATTATAATTTTCTTTATAGTAATACCTATCATAATTGGGGGATTTGGAAACTGATTAGTACCCCTTATACTAGGAGCTCCTGATATAGCATTCCCTCGAATAAACAACATAAGATTTTGGTTTCTACCTCCTTCCTTATCATTATTATTAATAAGAAGAATTGTAGAAAATGGTGCAGGAACAGGTTGAACTGTATACCCCCCTCTTTCAGCTAACATTGCCCATAGAGGATCCTCAGTTGATCTTGCAATTTTCAGACTACACCTAGCAGGTATTTCCTCAATTTTAGGAGCAGTCAATTTCATTTCAACAGTAATTAACATACGATCAACAGGAATCACATTTGACCGAATACCTTTATTTGTATGAGCCGTAGCAATTACAGCTCTTTTACTACTTCTGTCCCTCCCAGTATTAGCAGGAGCAATTACAATATTATTAACAGATCGAAATCTAAACACATCATTCTTTGACCCCGCAGGAGGTGGTGACCCTATTCTATACCAACACCTATTC
>740_Ctenicerini_gen_and_sp_1_Namhae_JN
AACCCTTTACTTCCTATTCGGAGCTTGGTCCGGAATACTAGGAACCTCCTTAAGATTATTAATTCGAGCAGAATTAGGAAATCCAGGATCTCTAATCGGAAATGATCAAATCTACAACGTAATTGTTACAGCTCACGCTTTCATTATAATTTTCTTTATAGTAATACCTATCATAATTGGAGGATTTGGAAACTGATTAGTACCCCTTATACTAGGAGCTCCTGATATAGCATTCCCTCGAATAAACAACATAAGATTTTGGTTTCTACCTCCTTCCTTATCATTATTATTAATAAGAAGAATTGTAGAAAATGGTGCAGGAACAGGTTGAACTGTGTACCCCCCTCTTTCAGCCAACATTGCCCATAGAGGATCCTCAGTTGATCTCGCAATTTTCAGGCTACATTTAGCAGGAATTTCCTCAATTTTAGGAGCAGTCAATTTCATTTCAACAGTAATTAACATACGGTCAACAGGAATCACATTTGACCGAATACCTTTATTTGTATGAGCCGTGGCAATTACAGCTCTTTTACTACTTTTATCCCTCCCAGTATTAGCAGGAGCAATTACAATATTATTAACAGATCGAAACCTAAACACCTCATTCTTTGACCCTGCAGGAGGTGGTGACCCTATCCTATACCAACACCTATTC
>741_Ctenicerini_gen_and_sp_1_Namhae_JN
AACCCTTTACTTCCTATTCGGAGCTTGGTCCGGAATACTAGGAACCTCCTTAAGATTATTAATTCGAGCAGAATTAGGAAATCCAGGATCTCTAATCGGAAATGATCAAATCTACAACGTAATTGTTACAGCTCACGCTTTCATTATAATTTTCTTTATAGTAATACCTATCATAATTGGAGGATTTGGAAACTGATTAGTACCCCTTATACTAGGAGCTCCTGATATAGCATTCCCTCGAATAAACAACATAAGATTTTGGTTTCTACCTCCTTCCTTATCATTATTATTAATAAGAAGAATTGTAGAAAATGGTGCAGGAACAGGTTGAACTGTGTACCCCCCTCTTTCAGCCAACATTGCCCATAGAGGATCCTCAGTTGATCTCGCAATTTTCAGGCTACATTTAGCAGGAATTTCCTCAATTTTAGGAGCAGTCAATTTCATTTCAACAGTAATTAACATACGGTCAACAGGAATCACATTTGACCGAATACCTTTATTTGTATGAGCCGTGGCAATTACAGCTCTTTTACTACTTTTATCCCTCCCAGTATTAGCAGGAGCAATTACAATATTATTAACAGATCGAAACCTAAACACCTCATTCTTTGACCCTGCAGGAGGTGGTGACCCTATCCTATACCAACACCTATTC
>742_Ctenicerini_gen_and_sp_1_Namhae_JN
AACCCTTTACTTCCTATTCGGAGCTTGGTCCGGAATACTAGGAACCTCCTTAAGATTATTAATTCGAGCAGAATTAGGAAATCCAGGATCTCTAATCGGAAATGATCAAATCTACAACGTAATTGTTACAGCTCACGCTTTCATTATAATTTTCTTTATAGTAATACCTATCATAATTGGAGGATTTGGAAACTGATTAGTACCCCTTATACTAGGAGCTCCTGATATAGCATTCCCTCGAATAAACAACATAAGATTTTGGTTTCTACCTCCTTCCTTATCATTATTATTAATAAGAAGAATTGTAGAAAATGGTGCAGGAACAGGTTGAACTGTGTACCCCCCTCTTTCAGCCAACATTGCCCATAGAGGATCCTCAGTTGATCTCGCAATTTTCAGGCTACATTTAGCAGGAATTTCCTCAATTTTAGGAGCAGTCAATTTCATTTCAACAGTAATTAACATACGGTCAACAGGAATCACATTTGACCGAATACCTTTATTTGTATGAGCCGTGGCAATTACAGCTCTTTTACTACTTTTATCCCTCCCAGTATTAGCAGGAGCAATTACAATATTATTAACAGATCGAAACCTAAACACCTCATTCTTTGACCCTGCAGGAGGTGGTGACCCTATCCTATACCAACACCTATTC
>743_Ctenicerini_gen_and_sp_1_Namhae_JN
AACCCTTTACTTCCTATTCGGAGCTTGGTCCGGAATACTAGGAACCTCCTTAAGATTATTAATTCGAGCAGAATTAGGAAATCCAGGATCTCTAATCGGAAATGATCAAATCTACAACGTAATTGTTACAGCTCACGCTTTCATTATAATTTTCTTTATAGTAATACCTATCATAATTGGAGGATTTGGAAACTGATTAGTACCCCTTATACTAGGAGCTCCTGATATAGCATTCCCTCGAATAAACAACATAAGATTTTGGTTTCTACCTCCTTCCTTATCATTATTATTAATAAGAAGAATTGTAGAAAATGGTGCAGGAACAGGTTGAACTGTGTACCCCCCTCTTTCAGCCAACATTGCCCATAGAGGATCCTCAGTTGATCTCGCAATTTTCAGGCTACATTTAGCAGGAATTTCCTCAATTTTAGGAGCAGTCAATTTCATTTCAACAGTAATTAACATACGGTCAACAGGAATCACATTTGACCGAATACCTTTATTTGTATGAGCCGTGGCAATTACAGCTCTTTTACTACTTTTATCCCTCCCAGTATTAGCAGGAGCAATTACAATATTATTAACAGATCGAAACCTAAACACCTCATTCTTTGACCCTGCAGGAGGTGGTGACCCTATCCTATACCAACACCTATTC
>2805_Ctenicerini_gen_and_sp_1_Mt_Odae_GW
AACCCTCTACTTCCTATTCGGAGCTTGATCCGGAATACTAGGAACCTCCTTAAGATTATTAATTCGAGCAGAATTAGGAAATCCAGGATCTCTAATCGGAAATGATCAAATCTACAACGTAATTGTTACAGCTCACGCTTTCATTATAATTTTCTTTATAGTAATACCCATCATAATTGGAGGATTTGGAAACTGGTTAGTACCCCTTATACTAGGAGCTCCTGATATAGCATTCCCTCGAATAAACAACATAAGATTTTGGTTTCTACCTCCTTCCTTATCATTATTATTAATAAGAAGAATTGTAGAAAATGGTGCAGGAACAGGTTGAACTGTGTACCCTCCTCTTTCAGCTAACATTGCCCATAGAGGATCCTCAGTTGATCTTGCAATTTTCAGACTACACTTAGCAGGAATTTCCTCAATTTTAGGAGCAGTCAATTTCATTTCAACAGTAATTAACATACGATCAACAGGAATCACATTTGACCGAATACCTTTATTTGTATGAGCCGTAGCAATCACAGCTCTTTTACTACTTCTGTCCCTCCCAGTGTTAGCAGGAGCAATTACAATATTATTAACAGATCGAAACCTAAACACATCATTCTTTGACCCCGCAGGAGGCGGTGACCCTATCCTATACCAACACCTATTC
>2814_Ctenicerini_gen_and_sp_1_Mt_Odae_GW
AACCCTCTACTTCCTATTCGGAGCTTGATCCGGAATACTAGGAACCTCCTTAAGATTATTAATTCGAGCAGAATTAGGAAATCCAGGATCTCTAATCGGAAATGATCAAATCTACAACGTAATTGTTACAGCTCACGCTTTCATTATAATTTTCTTTATAGTAATACCCATCATAATTGGAGGATTTGGAAACTGGTTAGTACCCCTTATACTAGGAGCTCCTGATATAGCATTCCCTCGAATAAACAACATAAGATTTTGGTTTCTACCTCCTTCCTTATCATTATTATTAATAAGAAGAATTGTAGAAAATGGTGCAGGAACAGGTTGAACTGTGTACCCTCCTCTTTCAGCTAACATTGCCCATAGAGGATCCTCAGTTGATCTTGCAATTTTCAGACTACACTTAGCAGGAATTTCCTCAATTTTAGGAGCAGTCAATTTCATTTCAACAGTAATTAACATACGATCAACAGGAATCACATTTGACCGAATACCTTTATTTGTATGAGCCGTAGCAATCACAGCTCTTTTACTACTTCTGTCCCTCCCAGTGTTAGCAGGAGCAATTACAATATTATTAACAGATCGAAACCTAAACACATCATTCTTTGACCCCGCAGGAGGCGGTGACCCTATCCTATACCAACACCTATTC
>2890_Ctenicerini_gen_and_sp_1_Mt_Bukhan_GG
AACCCTCTACTTCCTATTCGGAGCTTGATCCGGAATACTAGGAACCTCCTTAAGATTATTAATTCGAGCAGAATTAGGAAATCCAGGATCTCTAATCGGAAATGATCAAATCTACAACGTAATTGTTACAGCTCACGCTTTCATTATAATTTTCTTTATAGTAATACCCATCATAATTGGAGGATTTGGAAACTGGCTAGTACCCCTTATACTAGGAGCTCCTGATATAGCATTCCCTCGAATAAATAACATAAGATTTTGGTTTCTACCTCCTTCCTTATCATTATTATTAATAAGAAGAATTGTAGAAAATGGTGCAGGAACAGGTTGAACTGTGTACCCTCCTCTTTCAGCTAACATTGCCCATAGAGGATCCTCAGTTGATCTTGCAATTTTCAGACTACACTTAGCAGGAATTTCCTCAATTTTAGGAGCAGTCAATTTCATTTCAACAGTAATTAACATGCGATCAACAGGAATCACATTTGACCGAATACCTTTATTTGCATGAGCCGTAGCAATTACAGCTCTTTTACTACTTCTGTCCCTCCCAGTGTTAGCAGGAGCAATTACAATATTATTAACAGATCGAAACCTAAACACATCATTCTTTGACCCCGCAGGAGGTGGTGACCCTCTCCTATACCAACACCTATTC
>3113_Ctenicerini_gen_and_sp_1_Gwangreung_Pochoen_GG
AACCCTCTACTTCCTATTCGGAGCTTGATCCGGAATACTAGGAACCTCCTTAAGATTATTAATTCGAGCAGAATTAGGAAATCCAGGATCTCTAATCGGAAATGATCAAATCTACAACGTAATTGTTACAGCTCACGCTTTCATTATAATTTTCTTTATAGTAATACCCATCATAATTGGAGGATTTGGAAACTGGCTAGTACCCCTTATACTAGGAGCTCCTGATATAGCATTCCCTCGAATAAATAACATAAGATTTTGGTTTCTACCTCCTTCCTTATCATTATTATTAATAAGAAGAATTGTAGAAAATGGTGCAGGAACAGGTTGAACTGTGTACCCTCCTCTTTCAGCTAACATTGCCCATAGAGGATCCTCAGTTGATCTTGCAATTTTCAGACTACACTTAGCAGGAATTTCCTCAATTTTAGGAGCAGTCAATTTCATTTCAACAGTAATTAACATGCGATCAACAGGAATCACATTTGACCGAATACCTTTATTTGCATGAGCCGTAGCAATTACAGCTCTTTTACTACTTCTGTCCCTCCCAGTGTTAGCAGGAGCAATTACAATATTATTAACAGATCGAAACCTAAACACATCATTCTTTGACCCC---------------------------------------
>3115_Ctenicerini_gen_and_sp_1_Gapyeong_GG
AACCCTTTACTTCCTATTCGGAGCTTGATCCGGAATACTAGGAACCTCCTTAAGATTATTAATTCGAGCAGAATTAGGAAATCCAGGATCTCTAATCGGAAATGATCAAATCTACAACGTAATTGTTACAGCTCACGCTTTCATTATAATTTTCTTTATAGTAATACCTATCATAATTGGAGGATTTGGAAACTGGTTAGTACCCCTTATACTAGGAGCTCCTGATATAGCATTCCCTCGAATAAACAACATAAGATTTTGGTTTCTGCCTCCTTCCTTATCATTATTATTAATAAGAAGAATTGTAGAAAATGGTGCAGGAACAGGTTGAACTGTGTATCCCCCTCTTTCAGCTAATATTGCCCATAGAGGATCCTCAGTTGATCTTGCAATTTTCAGGCTACACTTAGCAGGAATTTCCTCAATTTTAGGAGCAGTCAATTTCATTTCAACAGTAATTAACATACGATCAACAGGAATCACATTTGACCGAATACCTTTATTTGTATGAGCCGTAGCAATTACTGCTCTTTTACTACTTCTGTCCCTCCCAGTATTAGCAGGAGCAATTACAATATTATTAACAGATCGAAACCTAAACACATCATTCTTTGACCCCGCAGGAGGTGGTGACCCTATCCTATACCAACACCTATTC
>3348_Ctenicerini_gen_and_sp_2_Mt_Jiri_Gurae_JN
AACCCTTTACTTCCTATTCGGAGCTTGATCCGGAATACTAGGAACCTCCTTAAGATTATTAATTCGAGCAGAATTAGGAAACCCCGGATCTCTAATCGGAAATGATCAAATCTACAACGTAATCGTTACAGCTCACGCTTTCATTATAATTTTCTTTATAGTAATACCTATCATAATTGGAGGATTTGGAAACTGGTTAGTACCCCTTATACTAGGAGCTCCTGATATAGCATTCCCTCGAATAAACAACATAAGATTTTGGTTCCTACCTCCTTCCTTATCATTATTATTAATAAGAAGAATTGTAGAAAATGGTGCAGGAACAGGTTGAACTGTGTACCCCCCTCTTTCAGCTAACATTGCTCATAGAGGATCCTCAGTTGATCTTGCAATTTTCAGGCTACACTTAGCAGGGATTTCCTCAATTTTAGGAGCAGTCAATTTCATTTCAACAGTAATTAACATACGATCAACAGGAATCACATTTGACCGAATACCTTTATTTGTATGAGCCGTAGCAATTACAGCTCTTTTACTACTTCTGTCCCTTCCAGTGTTAGCAGGAGCAATTACGATATTATTAACAGATCGAAACCTAAACACATCATTCTTTGACCCCGCAGGAGGCGGTGACCCTATCCTATACCAACACCTATTC
>3349_Ctenicerini_gen_and_sp_2_Mt_Jiri_Gurae_JN
AACCCTTTACTTCCTATTCGGAGCTTGATCCGGAATACTAGGAACCTCCTTAAGATTATTAATTCGAGCAGAATTAGGAAACCCCGGATCTCTAATCGGAAATGATCAAATCTACAACGTAATCGTTACAGCTCACGCTTTCATTATAATTTTCTTTATAGTAATACCTATCATAATTGGAGGATTTGGAAACTGGTTAGTACCCCTTATACTAGGAGCTCCTGATATAGCATTCCCCCGAATAAACAACATAAGATTTTGGTTCCTACCTCCTTCCTTATCATTATTATTAATAAGAAGAATTGTAGAAAATGGTGCAGGAACAGGTTGAACTGTGTACCCCCCTCTTTCAGCTAACATTGCTCATAGAGGATCCTCAGTTGATCTTGCAATTTTCAGGCTACACTTAGCAGGGATTTCCTCAATTTTAGGAGCAGTCAATTTCATTTCAACAGTAATTAACATACGATCAACAGGAATCACATTTGACCGAATACCTTTATTTGTATGAGCCGTAGCAATTACAGCTCTTTTACTACTTCTGTCCCTTCCAGTGTTAGCAGGAGCAATTACGATATTATTAACAGATCGAAACCTAAACACATCATTCTTTGACCCCGCAGGAGGCGGTGACCCTATCCTATACCAACACCTATTC
>3350_Ctenicerini_gen_and_sp_2_Mt_Jiri_Gurae_JN
AACCCTTTACTTCCTATTCGGAGCTTGATCCGGAATACTAGGAACCTCCTTAAGATTATTAATTCGAGCAGAATTAGGAAACCCCGGATCTCTAATCGGAAATGATCAAATCTACAACGTAATCGTTACAGCTCACGCTTTCATTATAATTTTCTTTATAGTAATACCTATCATAATTGGAGGATTTGGAAACTGGTTAGTACCCCTTATACTAGGAGCTCCTGATATAGCATTCCCCCGAATAAACAACATAAGATTTTGGTTCCTACCTCCTTCCTTATCATTATTATTAATAAGAAGAATTGTAGAAAATGGTGCAGGAACAGGTTGAACTGTGTACCCCCCTCTTTCAGCTAACATTGCTCATAGAGGATCCTCAGTTGATCTTGCAATTTTCAGGCTACACTTAGCAGGGATTTCCTCAATTTTAGGAGCAGTCAATTTCATTTCAACAGTAATTAACATACGATCAACAGGAATCACATTTGACCGAATACCTTTATTTGTATGAGCCGTAGCAATTACAGCTCTTTTACTACTTCTGTCCCTTCCAGTGTTAGCAGGAGCAATTACGATATTATTAACAGATCGAAACCTAAACACATCATTCTTTGACCCCGCAGGAGGCGGTGACCCTATCCTATACCAACACCTATTC
>2896_Poemnites_katalinbodorae_Uijeongbu_GG
AACGTTATATTTCCTTTTCGGAGCTTGATCCGGAATATTAGGAACCTCCTTAAGACTACTAATTCGAGCAGAATTGGGTAATCCAGGATCACTCATTGGGAATGACCAAATTTACAATGTAATTGTAACAGCTCACGCCTTCATCATAATTTTCTTCATAGTAATACCAATTATAATTGGAGGATTCGGAAATTGACTGGTTCCCCTAATATTAGGAGCCCCTGATATAGCATTTCCCCGAATAAACAACATAAGATTCTGATTCTTACCTCCTTCTCTATCATTATTACTTATAAGAAGAATTGTAGAAAATGGTGCTGGAACTGGCTGAACCGTATACCCTCCCCTATCAGCTAACATTGCCCATAGAGGTTCATCAGTAGATCTTGCTATTTTCAGTCTTCATCTAGCTGGAATTTCATCTATCCTCGGAGCAGTAAACTTCATCTCGACAGTAATTAATATACGAACAACTGGAATTACGTTTGATCGTATACCTTTATTTGTATGAGCAGTAGCAATTACTGCACTATTATTATTATTATCACTTCCAGTACTAGCAGGAGCAATCACAATACTACTAACTGACCGAAACCTAAACACATCCTTCTTTGACCCTGCAGGAGGAGGAGATCCCATCTTATACCAACACTTATTT
>2897_Poemnites_katalinbodorae_Mt_Bukhan_GG
AACGTTATATTTCCTTTTCGGAGCTTGATCCGGAATATTAGGAACCTCCTTAAGACTACTAATTCGAGCAGAATTGGGTAATCCAGGATCACTCATTGGGAATGACCAAATTTACAATGTAATTGTAACAGCTCACGCCTTCATCATAATTTTCTTCATAGTAATACCAATTATAATTGGAGGATTCGGAAATTGACTGGTTCCCCTAATATTAGGAGCCCCTGATATAGCATTTCCCCGAATAAACAACATAAGATTCTGATTCTTACCTCCTTCTCTATCATTATTACTTATAAGAAGAATTGTAGAAAATGGTGCTGGAACTGGCTGAACCGTATACCCTCCCCTATCAGCTAACATTGCCCATAGAGGTTCATCAGTAGATCTTGCTATTTTTAGTCTTCATCTAGCTGGAATTTCATCTATCCTCGGAGCAGTAAACTTCATCTCGACAGTAATTAATATACGAACAACTGGAATTACGTTTGATCGTATACCTTTATTTGTATGAGCAGTAGCAATTACTGCACTATTATTATTATTATCACTTCCAGTACTAGCAGGAGCAATCACAATACTACTAACTGACCGAAACCTAAACACATCCTTCTTTGACCCTGCGGGAGGAGGAGATCCCATCTTATACCAACACTTATTT
>865_Poemnites_katalinbodorae_Yangpyeong_GG
AACGTTATATTTCCTTTTCGGAGCTTGATCCGGAATATTAGGAACCTCCTTAAGACTACTAATTCGAGCAGAATTAGGTAATCCAGGATCACTCATTGGGAATGACCAAATTTACAATGTAATTGTAACAGCTCACGCCTTCATCATAATTTTCTTCATAGTAATACCAATTATAATTGGAGGATTCGGAAATTGACTAGTTCCCCTAATATTAGGAGCCCCTGATATAGCATTTCCCCGAATAAACAACATAAGATTCTGATTCTTACCTCCCTCTCTATCATTATTACTTATAAGAAGAATTGTAGAAAATGGCGCTGGAACTGGCTGAACCGTATACCCTCCCCTATCAGCTAACATTGCCCATAGAGGTTCATCAGTCGATCTTGCTATTTTCAGTCTTCACCTAGCTGGAATCTCATCTATCCTCGGAGCAGTAAACTTCATTTCAACAGTAATTAATATACGAACAACTGGAATCACGTTTGATCGCATACCTTTATTTGTATGAGCAGTAGCAATTACTGCACTATTATTATTATTATCACTTCCAGTACTAGCAGGAGCAATCACAATACTACTAACTGACCGAAACCTAAATACATCCTTCTTTGACCCTGCTGGAGGAGGAGATCCTATCCTATACCAACACTTATTT
>882_Poemnites_katalinbodorae_Yangpyeong_GG
AACGTTATATTTCCTTTTCGGAGCTTGATCCGGAATATTAGGAACCTCCTTAAGACTACTAATTCGAGCAGAATTAGGTAATCCAGGATCACTCATTGGGAATGACCAAATTTACAATGTAATTGTAACAGCTCACGCCTTCATCATAATTTTCTTCATAGTAATACCAATTATAATTGGAGGATTCGGAAATTGACTAGTTCCCCTAATATTAGGAGCCCCTGATATAGCATTTCCCCGAATAAACAACATAAGATTCTGATTCTTACCTCCCTCTCTATCATTATTACTTATAAGAAGAATTGTAGAAAATGGTGCTGGAACTGGTTGAACCGTATACCCTCCCCTATCAGCTAACATTGCCCACAGAGGTTCATCAGTCGATCTTGCTATTTTCAGTCTTCACTTAGCTGGAATTTCATCTATCCTCGGAGCAGTAAACTTCATCTCAACAGTAATTAATATACGAACAACTGGAATCACGTTTGATCGCATACCTTTATTTGTATGAGCAGTAGCAATTACTGCACTATTATTATTATTATCACTTCCAGTACTAGCAGGAGCAATCACAATACTACTAACTGACCGAAACCTAAATACATCCTTCTTTGACCCTGCTGGAGGAGGGGATCCTATCTTATACCAACACTTATTT
>883_Poemnites_katalinbodorae_Yangpyeong_GG
AACGTTATATTTCCTTTTCGGAGCTTGATCCGGAATATTAGGAACCTCCTTAAGACTACTAATTCGAGCAGAATTAGGTAATCCAGGATCACTCATTGGGAATGACCAAATTTACAATGTAATTGTAACAGCTCACGCCTTCATCATAATTTTCTTCATAGTAATACCAATTATAATTGGAGGATTCGGAAATTGACTAGTTCCCCTAATATTAGGAGCCCCTGATATAGCATTTCCCCGAATAAACAACATAAGATTCTGATTCTTACCTCCCTCTCTATCATTATTACTTATAAGAAGAATTGTAGAAAATGGCGCTGGAACTGGCTGAACCGTATACCCTCCCCTATCAGCTAACATTGCCCATAGAGGTTCATCAGTCGATCTTGCTATTTTCAGTCTTCACCTAGCTGGAATCTCATCTATCCTCGGAGCAGTAAACTTCATTTCAACAGTAATCAATATACGAACAACTGGAATCACGTTTGATCGCATACCTTTATTTGTATGAGCAGTAGCAATTACTGCACTATTATTATTATTATCACTTCCAGTACTAGCAGGAGCAATCACAATACTACTAACTGACCGAAACCTAAATACATCCTTCTTTGACCCTGCTGGAGGAGGAGATCCTATCCTATACCAACACTTATTT
>227_Actenicerus_infirmus_JJ
AACATTATACTTCCTATTCGGAGCATGAGCCGGAATATTAGGAACTAGCCTTAGTCTTCTAATCCGAGCTGAACTAGGAAATCCTGGCTCACTAATTGGAAATGACCAAATTTATAACGTCATTGTTACAGCACACGCATTCATCATAATTTTCTTTATAGTTATACCAATCATAATTGGTGGATTCGGGAACTGACTAGTACCCCTAATACTAGGAGCCCCAGATATAGCTTTCCCTCGAATAAATAACATAAGATTTTGGTTTCTACCTCCTTCACTGACACTTCTTCTAATAAGAAGAATTGTAGAAAATGGAGCGGGGACAGGATGAACCGTATACCCGCCCCTTTCCGCTAACATTGCTCATAGAGGATCCTCTGTAGACCTTGCAATTTTCAGCCTACACTTGGCAGGAATCTCCTCAATCCTAGGTGCTGTTAACTTCATCTCAACAGTAATTAATATACGATCTACAGGAATTACCTTTGACCGTATACCATTATTTGTATGAGCTGTAGCAATCACAGCCCTACTTCTTCTCTTATCCCTCCCTGTTCTTGCAGGAGCCATCACCATACTACTAACAGACCGAAACCTAAACACATCATTCTTCGACCCTGCAGGAGGAGGAGACCCAGTACTATACCAACACCTATTC
>363_Actenicerus_infirmus_JJ
AACATTATACTTCCTATTCGGAGCATGAGCCGGAATATTAGGAACTAGCCTTAGTCTTCTAATCCGAGCTGAACTAGGAAATCCTGGCTCACTAATTGGAAATGACCAAATTTATAACGTCATTGTTACAGCACACGCATTCATCATAATTTTCTTTATAGTTATACCAATCATAATTGGTGGATTCGGGAACTGACTAGTACCCCTAATACTAGGAGCCCCAGATATAGCTTTCCCTCGAATAAATAACATAAGATTTTGGTTTCTACCTCCTTCACTGACACTTCTTCTAATAAGAAGAATTGTAGAAAATGGAGCGGGAACAGGATGAACCGTATACCCACCCCTTTCCGCTAACATTGCTCATAGAGGATCCTCTGTAGACCTTGCAATTTTCAGCCTACACTTGGCAGGAATCTCCTCAATCCTAGGTGCCGTTAACTTCATCTCAACAGTAATTAATATACGATCTACAGGAATTACCTTTGACCGTATACCATTATTTGTATGAGCTGTAGCAATCACAGCCCTACTTCTTCTCTTATCCCTCCCTGTTCTTGCAGGAGCCATCACCATACTACTAACAGACCGAAACCTAAACACATCATTCTTCGACCCTGCAGGAGGAGGAGATCCAGTACTATACCAACACCTATTC
>816_Actenicerus_infirmus__JJ
AACATTATACTTCCTATTCGGAGCATGAGCCGGAATATTAGGAACTAGCCTTAGTCTTCTAATCCGAGCTGAACTAGGAAATCCTGGCTCACTAATTGGAAATGACCAAATTTATAACGTCATTGTTACAGCACACGCATTCATCATAATTTTCTTTATAGTTATACCAATCATAATTGGTGGATTCGGGAACTGACTAGTACCCCTAATACTAGGAGCCCCAGATATAGCTTTCCCTCGAATAAATAACATAAGATTTTGGTTTCTACCTCCTTCACTGACACTTCTTCTAATAAGAAGAATTGTAGAAAATGGAGCGGGGACAGGATGAACCGTATACCCACCCCTTTCCGCTAACATTGCTCATAGAGGATCCTCTGTAGACCTTGCAATTTTCAGCCTACACTTGGCAGGAATCTCCTCAATCCTAGGTGCCGTTAACTTCATCTCAACAGTAATTAATATACGATCTACAGGAATTACCTTTGACCGTATACCATTATTTGTATGAGCTGTAGCAATCACAGCCCTACTTCTACTCTTATCCCTCCCTGTTCTTGCAGGAGCCATCACCATACTACTAACAGACCGAAACCTAAACACATCATTCTTCGACCCTGCAGGAGGAGGAGATCCAGTACTATACCAACACCTATTC
>817_Actenicerus_infirmus_JJ
AACATTATACTTCCTATTCGGAGCATGAGCCGGAATATTAGGAACTAGCCTTAGTCTTCTAATCCGAGCTGAACTAGGAAATCCTGGCTCACTAATTGGAAATGACCAAATTTATAACGTCATTGTTACAGCACACGCATTCATCATAATTTTCTTTATAGTTATACCAATCATAATTGGTGGATTCGGGAACTGACTAGTACCCCTAATACTAGGAGCCCCAGATATAGCTTTCCCTCGAATAAATAACATAAGATTTTGGTTTCTACCTCCTTCACTGACACTTCTTCTAATAAGAAGAATTGTAGAAAATGGAGCGGGGACAGGATGAACCGTATACCCACCCCTTTCCGCTAACATTGCTCATAGAGGATCCTCTGTAGACCTTGCAATTTTCAGCCTACACTTGGCAGGAATCTCCTCAATCCTAGGTGCCGTTAACTTCATCTCAACAGTAATTAATATACGATCTACAGGAATTACCTTTGACCGTATACCATTATTTGTATGAGCTGTAGCAATCACAGCCCTACTTCTACTCTTATCCCTCCCTGTTCTTGCAGGAGCCATCACCATACTACTAACAGACCGAAACCTAAACACATCATTCTTCGACCCTGCAGGAGGAGGAGATCCAGTACTATACCAAC--------
>818_Actenicerus_infirmus__JJ
AACATTATACTTCCTATTCGGAGCATGAGCCGGAATATTAGGAACTAGCCTTAGTCTTCTAATCCGAGCTGAACTAGGAAATCCTGGCTCACTAATTGGAAATGACCAAATTTATAACGTCATTGTTACAGCACACGCATTCATCATAATTTTCTTTATAGTTATACCAATCATAATTGGTGGATTCGGGAACTGACTAGTACCCCTAATACTAGGAGCCCCAGATATAGCTTTCCCTCGAATAAATAACATAAGATTTTGGTTTCTACCTCCTTCACTGACACTTCTTCTAATAAGAAGAATTGTAGAAAATGGAGCGGGAACAGGATGAACCGTATACCCACCCCTTTCCGCTAACATTGCTCATAGAGGATCCTCTGTAGACCTTGCAATTTTCAGCCTACACTTGGCAGGAATCTCCTCAATCCTAGGTGCCGTTAACTTCATCTCAACAGTAATTAATATACGATCTACAGGAATTACCTTTGACCGTATACCATTATTTGTATGAGCTGTAGCAATCACAGCCCTACTTCTACTCTTATCCCTCCCTGTTCTTGCAGGAGCCATCACCATACTACTAACAGACCGAAACCTAAACACATCATTCTTCGACCCTGCAGGAGGAGGAGATCCAGTAC-----------------
>2269_Actenicerus_infirmus_JJ
AACATTATACTTCCTATTCGGAGCATGAGCCGGAATATTAGGAACTAGCCTTAGTCTTCTAATCCGAGCTGAACTAGGAAATCCTGGCTCACTAATTGGAAATGACCAAATTTATAACGTCATTGTTACAGCACACGCATTCATCATAATTTTCTTTATAGTTATACCAATCATAATTGGTGGATTCGGAAACTGACTAGTACCCCTAATACTAGGAGCCCCAGATATAGCTTTCCCTCGAATAAATAACATAAGATTTTGGTTTCTACCTCCTTCACTGACACTTCTTCTAATAAGAAGAATTGTAGAAAATGGAGCGGGGACAGGATGAACCGTATACCCACCCCTTTCCGCTAACATTGCTCATAGAGGATCCTCTGTAGACCTTGCAATTTTCAGCCTACACTTGGCAGGAATCTCCTCAATCCTAGGTGCCGTTAACTTCATCTCAACAGTAATTAATATACGATCTACAGGAATTACCTTTGACCGTATACCATTATTTGTATGAGCTGTAGCAATCACAGCCCTGCTTCTACTCTTATCCCTCCCTGTTCTTGCAGGAGCCATCACCATACTACTAACAGACCGAAACCTAAACACATCATTCTTCGACCCTGCAGGAGGAGGAGATCCAGTACTATACCAACACCTATTC
>3039_Actenicerus_infirmus_Is_Chuja_JJ
AACATTATACTTCCTATTCGGAGCATGAGCCGGAATATTAGGAACTAGCCTTAGTCTTCTAATCCGAGCTGAACTAGGAAATCCTGGCTCACTAATTGGAAATGACCAAATTTATAACGTCATTGTTACAGCACACGCATTCATCATAATTTTCTTTATAGTTATACCAATCATAATTGGTGGATTCGGAAACTGACTAGTACCCCTAATACTAGGAGCCCCAGATATAGCTTTCCCTCGAATAAATAACATAAGATTTTGGTTTCTACCTCCTTCACTGACACTTCTTCTAATAAGAAGAATTGTGGAAAATGGAGCAGGGACAGGATGAACCGTATACCCACCCCTTTCCGCTAACATTGCTCATAGAGGATCCTCTGTAGACCTTGCAATTTTCAGCCTACACTTGGCAGGAATCTCCTCAATCCTAGGTGCCGTTAACTTCATCTCAACAGTAATTAATATACGATCTACAGGAATTACCTTTGACCGTATACCATTATTTGTATGAGCTGTAGCAATCACAGCCCTACTTCTACTCTTATCCCTTCCTGTTCTTGCAGGAGCCATCACCATACTACTAACAGACCGAAACCTAAACACGTCATTCTTCGACCCTGCAGGAGGGGGAGATCCAGTACTATACCAACACCTATTC
>1049_Actenicerus_infirmus_Yeongsil_JJ
AACATTATACTTCCTATTCGGAGCATGAGCCGGAATATTAGGAACTAGCCTTAGTCTTCTAATCCGAGCTGAACTAGGAAATCCTGGCTCACTAATTGGAAATGACCAAATTTATAATGTCATTGTTACAGCACACGCATTCATCATAATTTTCTTTATAGTTATACCAATCATAATTGGTGGATTCGGGAACTGACTAGTACCCCTAATACTAGGAGCCCCAGATATAGCTTTCCCTCGAATAAATAACATAAGATTTTGGTTTCTACCTCCTTCACTGACACTTCTTCTAATAAGAAGAATTGTAGAAAATGGAGCGGGAACAGGATGAACCGTATACCCACCCCTTTCCGCTAACATTGCTCATAGAGGATCCTCTGTAGACCTTGCAATTTTCAGCCTACACTTGGCAGGAATCTCCTCAATCCTAGGTGCCGTTAACTTCATCTCAACAGTAATTAATATACGATCCACAGGAATTACCTTTGACCGTATACCATTATTTGTATGAGCTGTAGCAATCACAGCCCTACTTCTACTCTTATCCCTCCCTGTTCTTGCAGGAGCCATCACCATACTACTAACAGACCGAAACCTAAACACATCATTCTTCGACCCTGCAGGAGGAGGAGATCCAGTACTATACCAACACCTATTC
>2802_Actenicerus_infirmus_Milyang_GN
AACATTATACTTCCTATTCGGAGCATGAGCCGGAATATTAGGAACTAGCCTTAGTCTTCTAATCCGAGCTGAACTAGGAAATCCTGGCTCACTAATTGGAAATGACCAAATTTATAACGTCATTGTTACAGCACACGCATTCATCATAATTTTCTTTATAGTTATACCAATCATAATTGGTGGATTCGGAAACTGACTAGTACCCCTAATGCTAGGAGCCCCAGATATAGCTTTCCCTCGAATAAATAACATAAGATTTTGGTTTCTACCTCCTTCACTGACACTTCTTCTCATAAGAAGAATTGTGGAAAATGGAGCAGGGACAGGATGAACCGTATACCCACCCCTTTCCGCTAACATTGCTCATAGAGGATCCTCTGTAGACCTTGCAATTTTCAGCCTACACTTGGCAGGAATCTCCTCAATCCTAGGTGCCGTTAACTTCATCTCAACGGTAATTAATATACGATCCACAGGAATTACCTTTGACCGTATGCCATTATTTGTATGAGCTGTAGCAATCACAGCCCTACTCCTACTCTTATCACTCCCTGTTCTTGCAGGAGCCATCACCATACTACTAACAGACCGAAACCTAAACACGTCATTCTTCGACCCTGCAGGAGGAGGAGACCCAGTTCTATACCAACACCTATTC
>2506_Actenicerus_infirmus_Yeosu_JN
AACATTATACTTCCTATTCGGAGCATGAGCCGGAATATTAGGAACTAGCCTTAGTCTTCTAATCCGAGCTGAACTAGGAAATCCTGGCTCACTAATTGGAAATGACCAAATTTATAACGTCATTGTTACAGCACACGCATTCATCATAATTTTCTTTATAGTTATACCAATCATAATTGGTGGATTCGGAAACTGACTAGTACCCCTAATACTAGGAGCCCCAGATATAGCTTTCCCTCGAATAAATAACATAAGATTTTGGTTTCTACCTCCTTCACTGACACTTCTTCTAATAAGAAGAATTGTAGAAAATGGAGCAGGGACAGGATGAACCGTATACCCACCCCTTTCTGCTAACATTGCTCATAGAGGATCCTCTGTAGACCTTGCAATTTTCAGTCTACACTTGGCAGGAATCTCCTCAATCCTAGGTGCCGTTAACTTCATCTCAACAGTAATTAATATACGATCTACAGGAATTACCTTTGACCGTATACCATTATTTGTATGAGCTGTAGCAATCACAGCCCTACTTCTACTCTTATCCCTCCCTGTTCTTGCAGGAGCCATTACCATACTACTAACAGACCGAAACCTAAACACGTCATTCTTCGACCCTGCAGGAGGGGGAGATCCAGTACTATACCAACACCTATTC
>3249_Actenicerus_infirmus_Yeongwol_GW
AACATTATACTTCCTATTCGGAGCATGAGCCGGAATATTAGGAACTAGCCTTAGTCTTCTAATCCGAGCTGAACTAGGAAATCCTGGCTCACTAATTGGAAATGACCAAATTTATAACGTCATTGTTACAGCACACGCATTCATCATAATTTTCTTTATAGTTATACCAATCATAATTGGTGGATTCGGAAACTGACTAGTACCCCTAATGCTAGGAGCCCCAGATATAGCTTTCCCTCGAATAAATAACATAAGATTTTGGTTTCTACCTCCTTCACTGACACTTCTTCTCATAAGAAGAATTGTGGAAAATGGGGCAGGGACAGGATGAACCGTATACCCACCCCTTTCCGCTAACATTGCTCATAGAGGATCCTCCGTAGACCTTGCAATTTTCAGCCTACACTTGGCAGGAATCTCCTCAATCCTAGGTGCTGTTAACTTCATCTCAACGGTAATTAATATACGATCCACAGGAATTACCTTTGACCGTATGCCATTATTTGTATGAGCTGTAGCAATCACAGCCCTACTTCTACTCTTATCCCTCCCTGTTCTTGCAGGAGCCATCACCATACTACTAACAGACCGAAACCTAAACACGTCATTCTTCGACCCTGCAGGAGGAGGAGACCCAGTACTATACCAACACCTATTC
>2403_Actenicerus_alternatus_Primosky_Russia
AACATTATACTTCCTATTCGGAGCATGAGCCGGAATATTAGGAACTAGTCTTAGTCTTCTAATCCGAGCCGAGCTAGGAAATCCTGGTTCTCTAATTGGAAATGACCAAATCTATAACGTTATTGTTACAGCACACGCCTTTATCATAATTTTCTTTATAGTTATACCAATCATAATTGGTGGATTCGGAAACTGACTAGTACCCCTAATACTAGGAGCCCCAGACATAGCTTTCCCTCGAATAAATAACATAAGATTCTGGTTTTTACCTCCCTCCCTAACTCTACTACTAATAAGAAGAATTGTAGAAAACGGAGCAGGAACAGGATGAACTGTATACCCACCCCTTTCCGCCAATATTGCCCATAGAGGATCCTCCGTAGATCTTGCTATTTTCAGCCTACACCTAGCAGGAATCTCATCTATTCTAGGAGCCGTTAATTTTATCTCCACAGTAATTAATATACGATCAACAGGAATTACTTTTGACCGTATACCTCTATTTGTCTGAGCTGTAGCAATCACTGCACTTCTACTACTTCTTTCACTACCAGTACTAGCAGGAGCCATCACTATACTACTAACAGACCGAAACCTAAATACATCATTCTTTGACCCTGCAGGAGGGGGAGACCCAGTACTGTACCAACACTTATTC
>2404_Actenicerus_alternatus_Primosky_Russia
AACATTATACTTCCTATTCGGAGCATGAGCCGGAATATTAGGAACTAGTCTTAGTCTTCTAATCCGAGCCGAGCTAGGAAATCCTGGTTCTCTAATTGGAAATGACCAAATCTATAACGTTATTGTTACAGCACACGCCTTTATCATAATTTTCTTTATAGTTATACCAATCATAATTGGTGGATTCGGAAACTGACTAGTACCCCTAATACTAGGAGCCCCAGACATAGCTTTCCCTCGAATAAATAACATAAGATTCTGGTTTTTACCTCCCTCCCTAACTCTACTACTAATAAGAAGAATTGTAGAAAACGGAGCAGGAACAGGATGAACTGTATACCCACCCCTTTCCGCCAATATTGCCCATAGAGGATCCTCCGTAGATCTTGCTATTTTCAGCCTACACCTAGCAGGAATCTCATCTATTCTAGGAGCCGTTAATTTTATCTCCACAGTAATTAATATACGATCAACAGGAATTACTTTTGACCGTATACCTCTATTTGTCTGAGCTGTAGCAATCACTGCACTTCTACTACTTCTTTCACTACCAGTACTAGCAGGAGCCATCACTATACTACTAACAGACCGAAACCTAAATACATCATTCTTTGACCCTGCAGGAGGGGGAGACCCAGTACTGTACCAACACTTATTC
>3309_Actenicerus_alternatus_Deagwanryeong_GW
--------------------------------------------CTAGTCTTAGTCTTCTTATCCGAGCCGAGCTAGGAAACCCTGGGTCTCTAATTGGAAATGACCAAATCTATAACGTTATTGTTACAGCACACGCCTTTATCATAATTTTCTTTATAGTTATACCAATCATAATTGGTGGATTCGGAAACTGACTAGTACCCCTAATACTAGGAGCCCCAGACATAGCTTTCCCTCGAATAAATAACATAAGATTTTGGTTTCTACCTCCCTCCCTAACCCTACTACTAATAAGAAGAATTGTAGAAAATGGGGCAGGAACAGGATGAACTGTATACCCACCCCTTTCCGCTAATATTGCCCATAGAGGATCATCTGTAGATCTTGCTATTTTCAGACTACACCTAGCAGGGATCTCATCTATTCTAGGAGCCGTTAATTTTATCTCCACAGTAATTAATATACGATCAACAGGAATTACTTTTGACCGTATACCTCTATTTGTCTGAGCTGTAGCAATCACTGCACTTCTACTACTTCTATCACTACCAGTACTAGCAGGAGCCATCACTATACTACTAACAGACCGAAACCTAAATACATCATTCTTTGACCCTGCCGGAGGAGGAGACCCAGTACTGTACCAACACTTATTC
>Actenicerus_odaisanus_Japan_AB375506
AACATTATACTTCCTATTCGGAGCATGAGCCGGTATATTAGGGACTAGCCTTAGTCTTCTAATCCGAGCCGAGTTAGGAAACCCTGGGTCATTAATTGGTAATGATCAGATTTACAACGTTATTGTTACAGCACACGCATTCATTATAATTTTCTTCATAGTTATACCTATTATAATTGGGGGATTCGGAAACTGATTAGTCCCCCTAATACTAGGGGCACCAGACATAGCATTCCCTCGAATAAACAACATAAGATTTTGGTTTCTACCCCCCTCTCTCTCTCTACTCCTAATAAGAAGAATTGTGGAAAACGGAGCAGGAACAGGATGAACCGTGTACCCCCCTCTATCAGCAAATATCGCACACAGAGGGTCATCTGTAGACTTGGCCATTTTTAGTTTACATCTTGCAGGAATCTCCTCCATTCTAGGAGCTGTTAATTTCATCTCAACAGTTATCAATATACGATCAACAGGAATCACCTTTGACCGGATACCTCTATTTGTATGAGCAGTAGCCATCACAGCTCTTCTTCTCCTACTTTCTCTCCCGGTACTAGCAGGAGCTATCACCATACTACTAACAGACCGAAACCTAAACACCTCATTCTTTGAC------------------------------------------
>Actenicerus_orientalis_Japan_AB375507
AACATTATACTTCCTATTCGGAGCATGAGCTGGAATATTGGGGACTAGTCTTAGTCTTCTAATCCGAGCCGAACTAGGAAACCCTGGTTCCCTAATTGGAAATGACCAAATCTATAATGTTATTGTTACAGCACACGCATTTATCATAATTTTCTTTATAGTTATACCAATCATGATTGGTGGATTCGGAAACTGACTAGTACCCCTAATACTAGGAGCCCCAGATATAGCTTTCCCTCGAATAAATAACATAAGATTCTGATTTCTACCTCCTTCCCTAACTCTCCTACTAATAAGAAGAATTGTAGAAAACGGTGCAGGAACAGGATGAACTGTATACCCACCCCTTTCTGCCAATATTGCTCATAGAGGATCCTCTGTAGATCTTGCCATCTTCAGCCTACACCTAGCAGGAATCTCATCTATTCTAGGGGCCGTTAATTTTATCTCAACAGTAATTAATATACGATCAACAGGAATTACCTTTGACCGTATACCTCTATTTGTTTGAGCTGTAGCAATTACAGCTCTACTCCTCCTTCTATCACTGCCAGTACTGGCAGGAGCCATCACTATACTCCTAACAGACCGAAACCTAAATACGTCATTCTTCGAC------------------------------------------
>Actenicerus_pruinosus_Japan_AB375509
AACATTATACTTCCTATTCGGAGCATGAGCCGGGATATTAGGAACTAGCCTTAGTCTTCTAATCCGAGCCGAGCTGGGAAACCCAGGATCGTTAATTGGTAACGACCAAATTTACAACGTTATTGTCACAGCACACGCATTCATTATAATTTTCTTCATAGTTATACCTATCATAATTGGTGGATTCGGAAACTGATTAGTTCCACTAATACTAGGAGCCCCAGATATAGCTTTCCCCCGAATAAATAACATAAGATTTTGGTTCCTTCCCCCTTCCTTGTCACTTTTACTAATAAGAAGAATTGTAGAAAATGGGGCAGGTACCGGCTGAACCGTATACCCACCCCTATCAGCCAACATTGCTCACAGAGGATCATCCGTAGACTTAGCTATTTTCAGACTTCACCTAGCAGGAATCTCATCCATTTTAGGTGCTGTTAATTTCATTTCAACAGTAATCAATATACGATCAACAGGAATCACCTTTGACCGCATACCTCTATTTGTCTGAGCAGTAGCAATTACTGCCCTTCTTCTTCTCTTATCACTGCCAGTACTAGCAGGAGCCATTACTATATTACTAACAGACCGAAATTTAAACACATCATTCTTTGAT------------------------------------------
>Actenicerus_yamashiro_Japan_AB375510
TACATTATACTTCCTATTCGGAGCATGAGCCGGGATATTAGGAACTAGACTTAGACTTCTAATCCGAGCCGAGCTAGGAAACCCTGGATCATTAATTGGTAATGACCAGATCTACAACGTTATTGTTACAGCACACGCATTCATTATAATTTTCTTCATAGTTATACCCATTATAATTGGAGGATTCGGAAACTGATTAGTCCCACTAATACTAGGAGCACCTGATATAGCCTTCCCTCGGATAAACAATATAAGATTTTGGTTTCTTCCCCCTTCCTTATCACTTTTACTAATAAGAAGAATTGTAGAAAATGGGGCAGGTACTGGATGAACTGTATACCCACCACTCTCAGCCAACATCGCTCACAGAGGATCTTCTGTAGATCTGGCCATTTTCAGACTTCATCTAGCAGGAATCTCCTCCATCTTAGGAGCTGTTAATTTCATCTCAACAGTAATCAATATACGATCAACAGGAATCACCTTTGACCGAATACCACTATTTGTTTGAGCAGTAGCAATTACTGCTCTTCTTCTCCTTTTGTCACTACCAGTTCTCGCAGGAGCCATCACTATATTACTAACAGATCGAAACTTGAATACGTCATTCTTTGAC------------------------------------------
>Actenicerus_suzukii_Japan_AB375508
AACATTATACTTCCTATTTGGAGCATGAGCCGGAATACTAGGAACTAGCCTTAGTCTTCTAATCCGAGCCGAGCTAGGAAACCCTGGATCATTAATTGGTAATGACCAGATTTACAACGTTATCGTAACAGCACACGCATTCATCATAATTTTCTTCATAGTTATACCTATCATAATTGGTGGATTCGGAAACTGATTAGTTCCACTAATGCTAGGAGCACCTGATATAGCATTCCCCCGAATAAACAATATAAGATTTTGGTTCCTACCACCTTCATTATCACTACTACTAATAAGAAGAATTGTAGAAAATGGAGCAGGGACAGGCTGAACTGTATACCCACCCCTATCAGCAAACATTGCACACAGAGGATCTTCAGTAGATCTAGCCATTTTTAGTCTACACCTGGCAGGAATCTCCTCTATTTTAGGTGCAGTTAATTTCATCTCGACAGTAATCAACATACGATCCACAGGAATCACCTTTGACCGTATACCCCTATTTGTTTGAGCAGTAGCAATCACTGCTCTACTTCTACTCCTATCACTTCCAGTACTAGCAGGAGCCATTACTATACTATTAACAGACCGAAACCTTAATACTTCATTCTTTGAT------------------------------------------
>Actenicerus_naomii_Japan_AB375505
AACATTATACTTCCTATTCGGGGCATGAGCTGGAATATTAGGAACTAGTCTTAGTCTTCTAATCCGAGCCGAATTAGGAAACCCTGGTTCCCTAATTGGAAATGACCAAATCTATAATGTTATTGTTACAGCGCACGCATTTATCATAATTTTCTTTATAGTTATACCAATCATAATTGGTGGATTCGGAAACTGACTAGTACCCCTAATACTAGGAGCTCCAGATATAGCCTTCCCTCGAATAAATAACATAAGATTCTGATTTCTACCTCCTTCCCTAACTCTCCTTCTAATAAGAAGAATTGTAGAAAACGGTGCAGGAACAGGATGAACTGTATATCCACCCCTTTCCGCCAATATTGCTCACAGAGGATCCTCTGTAGACCTTGCCATTTTCAGCCTACACCTAGCAGGAATCTCGTCTATTCTAGGAGCTGTTAATTTTATCTCAACAGTAATTAATATACGATCAACAGGGATTACCTTTGACCGTATACCTCTATTTGTTTGAGCTGTAGCAATTACAGCCCTTCTTCTCCTTCTATCACTACCAGTACTGGCAGGAGCCATCACTATACTCCTAACAGACCGAAACCTAAATACGTCATTCTTCGAC------------------------------------------
>Actenicerus_kidonoi_Japan_AB375504
AACATTATACTTCCTATTCGGGGCATGAGCTGGAATATTAGGAACTAGTCTTAGTCTTCTAATCCGAGCCGAGCTGGGAAATCCTGGGTCTCTAATTGGAAATGACCAAATCTATAATGTTATTGTTACAGCACACGCATTTATCATAATTTTCTTTATAGTTATACCAATCATAATTGGTGGATTCGGAAACTGGCTAGTACCCCTAATACTAGGCGCCCCAGATATAGCTTTCCCTCGAATAAATAACATAAGATTTTGATTCCTACCTCCTTCCCTGACTCTCCTGTTAATAAGAAGAATCGTAGAAAACGGTGCAGGAACAGGGTGAACTGTATACCCACCCCTTTCCGCCAATATTGCTCATAGAGGATCATCTGTAGATCTTGCCATTTTCAGCCTACACCTAGCAGGAATCTCATCTATTCTAGGAGCCGTTAATTTTATCTCTACAGTAATTAATATACGATCAACAGGAATTACCTTTGACCGTATGCCCCTGTTCGTTTGAGCTGTAGCAATCACAGCCCTACTCCTACTCCTATCACTACCAGTACTTGCAGGAGCCATCACTATACTCCTAACAGACCGAAACCTAAATACGTCATTCTTTGAT------------------------------------------
>Actenicerus_kiashianus_Japan_AB375503
TACATTATACTTCCTATTCGGAGCATGAGCCGGAATATTAGGAACTAGACTTAGACTTCTAATCCGAGCCGAGCTGGGAAACCCTGGATCATTAATTGGTAATGACCAGATCTACAACGTTATTGTCACAGCACACGCATTCATTATAATTTTCTTCATAGTTATACCCATTATAATTGGTGGATTCGGAAACTGATTAGTCCCACTAATACTAGGAGCGCCAGATATAGCCTTCCCTCGAATAAACAACATAAGATTTTGGTTCCTTCCCCCCTCCTTGTCACTTTTACTAATAAGAAGAATTGTAGAAAATGGAGCAGGTACTGGATGAACTGTATACCCACCACTTTCAGCCAACATTGCTCACAGAGGATCTTCTGTAGATCTAGCTATTTTCAGACTTCACCTAGCAGGAATCTCCTCCATCTTAGGTGCCGTTAATTTCATCTCAACAGTAATCAATATACGATCAACAGGAATCACTTTTGACCGAATACCACTATTTGTTTGAGCAGTAGCAATTACTGCCCTTCTCCTCCTTCTTTCACTACCAGTACTTGCAGGAGCAATCACTATATTATTAACAGATCGAAACTTGAATACGTCATTCTTTGAT------------------------------------------
>Actenicerus_giganteus_Japan_AB375502
AACATTATACTTCCTATTCGGAGCATGAGCCGGAATATTAGGAACTAGCCTTAGTCTTCTAATCCGAGCCGAGCTGGGAAACCCTGGGTCTCTAATTGGAAATGATCAAATCTATAATGTTATTGTTACAGCACACGCATTTATCATAATTTTCTTTATAGTTATACCAATCATAATTGGTGGATTCGGAAACTGACTAGTACCCCTAATACTAGGCGCCCCAGATATAGCTTTCCCTCGAATAAATAACATAAGATTTTGATTTCTGCCTCCTTCCCTGACTCTCCTACTAATAAGAAGAATTGTAGAAAACGGTGCAGGAACAGGATGAACTGTATATCCACCCCTTTCCGCCAATATTGCTCATAGAGGATCCTCTGTAGATCTTGCCATTTTCAGCCTACACCTAGCAGGAATCTCATCTATTCTAGGAGCCGTTAATTTTATCTCTACAGTAATTAACATACGATCAACAGGAATTACCTTTGACCGTATACCCCTGTTCGTTTGAGCTGTAGCAATCACAGCCCTGCTCCTACTCCTATCACTACCGGTACTGGCAGGAGCCATCACTATACTCCTAACAGACCGAAACCTAAATACGTCATTCTTTGAC------------------------------------------
>Actenicerus_athoides_Japan_AB375501
AACATTATACTTCCTATTCGGAGCATGAGCCGGAATATTAGGAACCAGACTTAGCCTTCTAATCCGAGCTGAACTAGGAAACCCTGGCTCATTAATTGGAAATGACCAAATTTACAATGTTATTGTTACAGCACACGCATTCATCATAATTTTCTTTATAGTTATACCAATTATAATTGGTGGATTTGGAAACTGACTAGTACCCCTAATACTAGGAGCCCCAGATATAGCTTTCCCTCGAATAAATAACATAAGATTCTGGTTTCTACCCCCCTCTCTTTCCCTTCTCCTAATAAGAAGAATTGTAGAAAATGGAGCAGGAACAGGATGAACTGTGTATCCCCCCCTCTCAGCCAATATTGCTCACAGAGGATCCTCCGTAGACCTAGCCATTTTCAGACTACACCTAGCAGGAATCTCTTCTATCCTAGGTGCTGTTAATTTCATCTCAACAGTTATTAATATACGATCAACAGGAATTACCTTTGACCGTATACCTTTATTTGTCTGAGCCGTAGCAATTACTGCCCTTCTTCTTCTTCTATCTCTCCCAGTTCTTGCAGGAGCTATCACTATACTACTCACAGACCGAAACTTGAACACCTCATTCTTTGAC------------------------------------------
>Actenicerus_aerosus_Japan_AB375500
AACATTGTATTTCTTGTTTGGGGCCTGAGCTGGGATACTAGGAACTAGTCTTAGCCTCCTAATCCGAGCTGAACTTGGAAATCCAGGATCATTAATCGGTAATGACCAAATCTACAACGTTATTGTAACAGCACACGCATTCATTATAATTTTCTTCATAGTAATACCTATTATAATTGGAGGATTCGGAAACTGACTAGTACCTTTAATACTAGGTGCCCCAGACATAGCATTCCCCCGAATAAACAATATAAGATTTTGGTTCCTTCCTCCTTCTTTATCTCTTCTATTAATAAGAAGAATTGTAGAAAATGGAGCAGGAACAGGATGAACAGTATACCCCCCATTATCAGCCAATATTGCTCATAGAGGGTCCTCTGTAGACCTAGCAATCTTCAGTCTACATTTAGCAGGAATCTCCTCTATTTTAGGAGCTGTAAATTTCATTTCAACAGTGATTAATATACGATCAACGGGAATTACATTTGACCGAATACCATTGTTTGTCTGAGCAGTTGCAATTACAGCTCTTCTTCTTCTCCTGTCATTACCAGTCCTAGCAGGAGCTATTACTATATTACTAACAGACCGAAATTTAAACACATCATTCTTTGAC------------------------------------------
>Actenicerus_siaelandicus_Austria_HM542009
-----------------------------------------------------------------------------------------------------------------------------------------------------------------------------------------------------------------------------------------------------------------------------------------------------------------------------------------GAACTGTTTACCCGCCCCTATCAGCTAACATCGCCCACAGAGGATCATCTGTTGATCTAGCTATTTTTAGACTACACCTAGCAGGAATCTCCTCCATCTTAGGTGCAGTTAATTTCATCTCAACAGTAATCAATATACGATCAACAGGAATTACATTTGACCGAATACCTCTGTTTGTTTGAGCAGTTGCAATTACTGCACTTCTGCTACTATTATCACTCCCAGTACTAGCAGGAGCTATTACCATATTATTAACAGATCGAAACCTAAATACATCGTTCTTTGATCCTGCAGGAGGAGGAGACCCAGTACTATACCAACACTTATTT
>799_Pristilophus_melancholichus_Russia
AACATTATATTTCCTATTTGGTGCCTGAGCTGGCATACTAGGTACATCTCTTAGATTATTAATTCGTGCCGAACTAGGTAATCCTGGGTCTTTGATCGGAAATGATCAAATTTATAACGTTATTGTTACAGCTCATGCTTTCATTATAATTTTCTTCATGGTTATGCCAATTATAATTGGGGGGTTCGGTAATTGATTAGTCCCTCTTATACTCGGTGCTCCTGATATGGCTTTTCCTCGAATAAACAATATAAGATTTTGGTTTCTCCCTCCTTCTTTGTCATTACTTTTAATAAGAAGAATTGTAGAAAACGGTGCAGGCACTGGGTGAACAGTGTATCCTCCTTTATCAGCAAATATTGCTCATAGAGGATCTTCTGTAGACTTGGCTATTTTCAGTCTTCATTTGGCAGGTATTTCTTCTATTCTAGGAGCTGTAAATTTTATTTCAACTGTAATTAATATACGTTCTACAGGAATTACTTTTGATCGTATACCTTTATTTGTTTGGGCTGTAGCTATTACAGCTCTTCTTTTACTTCTTTCTTTGCCTGTGTTAGCGGGTGCTATTACAATGTTATTAACTGATCGTAACCTTAATACTTCTTTTTTTGATCCTGCAGGTGGGGGAGATCCTATTCTATATCAACACTTGTTT
>824_Selatosomus_coreanus_Uiwang_GG
AACTCTATATTTCCTTTTTGGTGCCTGAGCAGGAATGTTAGGAACTTCTCTTAGCCTTCTGATTCGAGCTGAACTAGGTAACCCCGGCTCTCTCATTGGTAATGACCAAATTTACAACGTAATCGTTACAGCCCACGCCTTTATTATAATTTTCTTCATAGTAATACCAATCATAATTGGAGGATTCGGAAATTGACTCGTACCTCTAATACTAGGGGCCCCTGATATAGCATTCCCACGTATAAACAACATAAGATTCTGATTCCTGCCACCCTCTCTATCACTTTTACTAATAAGAAGAATCGTGGAAAACGGAGCAGGAACAGGATGAACTGTCTACCCCCCTCTCTCAGCCAATATTGCCCATAGAGGATCATCAGTTGACCTGGCAATTTTCAGATTACACCTAGCAGGGATTTCGTCAATCCTAGGGGCCGTAAATTTCATCTCAACAGTTATTAATATACGATCAACTGGAATTACCTTTGACCGAATACCTTTATTTGTATGAGCAGTGGCTATTACAGCCCTCCTTCTACTCTTATCTCTGCCGGTCCTAGCAGGAGCAATCACGATGTTACTAACCGATCGAAACCTAAATACATCCTTTTTTGACCCCGCGGGGGGAGGAGACCCAATTCTGTATCAACACCTATTC
>875_Selatosomus_coreanus_Injae_GW
AACTCTATATTTCCTTTTTGGTGCCTGAGCAGGAATGTTAGGAACTTCTCTTAGCCTTCTGATTCGAGCTGAACTAGGTAACCCCGGCTCTCTCATTGGTAATGACCAAATTTACAACGTAATCGTTACAGCCCACGCCTTTATTATAATTTTCTTCATAGTAATACCAATCATAATTGGAGGATTCGGAAATTGACTCGTACCTCTAATACTAGGAGCCCCtGATATAGCATTCCCACGTATAAACAACATAAGATTCTGATTCCTGCCACCCTCTCTATCACTTTTACTAATAAGAAGAATCGTGGAAAACGGAGCAGGAACAGGGTGAACTGTCTACCCCCCTCTCTCAGCCAATATTGCCCATAGAGGATCATCAGTTGACCTGGCAATTTTCAGATTACACCTAGCAGGGATTTCGTCAATCCTAGGAGCCGTAAATTTCATCTCAACAGTTATTAATATACGATCAACTGGAATTACCTTTGACCGAATACCTTTATTTGTATGAGCAGTAGCTATTACAGCCCTCCTTCTGCTCTTATCTCTGCCGGTCCTAGCAGGAGCAATCACGATGTTACTAACCGATCGAAACCTAAATACATCCTTTTTTGACCCCGCGGGGGGAGGAGACCCAATTCTGTATCAACACCTATTC
>2796_Selatosomus_coreanus_Uiwang_GG
AACTCTATATTTCCTTTTTGGTGCCTGAGCAGGAATGTTAGGAACTTCTCTTAGCCTTCTGATTCGAGCTGAACTAGGTAACCCCGGCTCTCTCATTGGTAATGACCAAATTTACAACGTAATCGTTACAGCCCACGCCTTTATTATAATTTTCTTCATAGTAATACCAATCATAATTGGAGGATTCGGAAATTGACTTGTACCTCTAATACTAGGAGCCCCTGATATAGCATTCCCACGTATAAACAACATAAGATTCTGATTCCTACCACCCTCTCTATCACTTTTACTAATAAGAAGAATCGTGGAAAACGGAGCAGGAACAGGGTGAACTGTCTACCCTCCTCTCTCAGCCAATATTGCCCATAGAGGGTCATCAGTTGACCTGGCAATTTTCAGATTACACCTAGCAGGGATTTCATCAATCCTAGGGGCCGTAAATTTCATCTCAACAGTTATTAATATACGATCAACTGGAATTACCTTTGACCGAATACCTTTATTTGTATGAGCAGTAGCTATTACAGCCCTCCTTCTACTCTTATCTCTGCCGGTCCTAGCAGGAGCAATTACAATATTACTAACCGATCGAAACCTAAATACATCCTTTTTTGACCCCGCGGGGGGAGGAGACCCAATTCTGTATCAACACCTATTC
>2797_Selatosomus_coreanus_Mt_Odae_GW
AACTCTATATTTCCTTTTTGGTGCCTGAGCAGGAATGTTAGGAACTTCTCTTAGCCTTCTAATTCGAGCTGAACTAGGTAACCCCGGCTCTCTCATTGGTAATGACCAAATTTACAACGTAATCGTTACAGCCCACGCTTTTATTATAATTTTCTTCATAGTAATACCAATCATAATTGGGGGATTCGGAAATTGACTCGTACCTCTAATACTAGGGGCCCCTGATATAGCATTCCCACGTATAAACAACATAAGATTCTGATTCCTGCCACCCTCTCTATCACTTTTACTAATAAGAAGAATCGTGGAAAACGGAGCAGGAACAGGGTGAACTGTCTACCCTCCTCTCTCAGCCAATATTGCCCATAGAGGATCATCAGTTGACCTGGCAATTTTCAGATTACACCTAGCGGGGATTTCGTCAATCCTAGGGGCCGTAAATTTCATCTCAACAGTTATTAATATACGATCAACTGGAATTACCTTTGACCGAATACCTTTATTTGTATGAGCAGTAGCTATTACAGCCCTCCTTCTACTCTTATCTCTGCCGGTCCTAGCAGGAGCAATCACGATGTTACTAACCGATCGAAACCTAAATACATCCTTTTTTGACCCCGCAGGGGGAGGAGACCCAATTCTGTATCAACACCTATTC
>2831_Selatosomus_coreanus_Mt_Seolak_GW
AACTCTATATTTCCTTTTTGGTGCCTGAGCAGGAATGTTAGGAACTTCTCTTAGCCTTCTGATTCGAGCTGAACTAGGTAACCCCGGCTCTCTCATTGGTAATGACCAAATTTACAACGTAATCGTTACAGCCCACGCCTTTATTATAATTTTCTTCATAGTAATACCAATCATAATTGGAGGATTCGGAAATTGACTCGTACCTCTAATACTGGGGGCCCCTGATATAGCATTCCCACGTATAAACAACATAAGATTCTGATTCCTGCCACCCTCTCTATCACTTTTACTAATAAGAAGAATCGTGGAAAACGGAGCAGGAACAGGATGAACTGTCTACCCCCCTCTCTCAGCCAATATTGCCCATAGAGGGTCATCAGTTGACCTGGCAATTTTCAGATTACACCTAGCAGGGATTTCGTCAATCCTAGGGGCCGTAAATTTCATCTCAACAGTTATTAATATACGATCAACTGGAATTACCTTTGACCGAATACCTTTATTTGTATGAGCAGTGGCTATTACAGCCCTCCTTCTACTCTTATCTCTGCCGGTCCTAGCAGGAGCAATCACGATGTTACTAACCGATCGAAACCTAAATACATCCTTTTTTGACCCCGCGGGGGGAGGAGACCCAATTCTGTACCAACACCTATTC
>2837_Selatosomus_coreanus_Mt_Seolak_GW
AACTCTATATTTCCTTTTTGGTGCCTGAGCAGGAATGTTAGGAACTTCTCTTAGCCTTCTGATTCGAGCTGAACTAGGTAACCCCGGCTCTCTCATTGGTAATGACCAAATTTACAACGTAATCGTTACAGCCCACGCCTTTATTATAATTTTCTTCATAGTAATACCAATCATAATTGGAGGATTCGGAAATTGACTCGTACCTCTAATACTAGGAGCCCCTGATATAGCATTCCCACGTATAAACAACATAAGATTCTGATTCCTGCCACCCTCTCTATCACTTTTACTAATAAGAAGAATCGTGGAAAACGGAGCAGGAACAGGGTGAACTGTCTACCCCCCTCTCTCAGCCAATATTGCCCATAGAGGATCATCAGTTGACCTGGCAATTTTCAGATTACACCTAGCAGGGATTTCGTCAATCCTAGGAGCCGTAAATTTCATCTCAACAGTTATTAATATACGATCAACTGGAATTACCTTTGACCGAATACCTTTATTTGTATGAGCAGTAGCTATTACAGCCCTCCTTCTACTCTTATCTCTGCCGGTCCTAGCAGGAGCAATCACGATGTTACTAACCGATCGAAACCTAAATACATCCTTTTTTGACCCCGCGGGGGGAGGAGACCCAATTCTGTATCAACACCTATTC
>2844_Selatosomus_coreanus_Mt_Seolak_GW
AACTCTATATTTCCTTTTTGGTGCCTGAGCAGGAATGTTAGGAACTTCTCTTAGCCTTCTGATTCGAGCTGAACTAGGTAACCCCGGCTCTCTCATTGGTAATGACCAAATTTACAACGTAATCGTTACAGCCCACGCCTTTATTATAATTTTCTTCATAGTAATACCAATCATAATTGGAGGATTCGGAAATTGACTCGTACCTCTAATACTAGGAGCCCCTGATATAGCATTCCCACGTATAAACAACATAAGATTCTGATTCCTGCCACCCTCTCTATCACTTTTACTAATAAGAAGAATCGTGGAAAACGGAGCAGGAACAGGATGAACTGTCTACCCCCCTCTCTCAGCCAATATTGCCCATAGAGGATCATCAGTTGACCTGGCAATTTTCAGATTACACCTAGCAGGGATTTCGTCAATCCTAGGAGCCGTAAATTTCATCTCAACAGTTATTAATATACGATCAACTGGAATTACCTTTGACCGAATACCTTTATTTGTATGAGCAGTGGCTATTACAGCCCTCCTTCTACTCTTATCTCTGCCGGTCCTAGCAGGAGCAATCACGATGTTACTAACCGATCGAAACCTAAATACATCCTTTTTTGACCCCGCGGGGGGAGGAGACCCAATTCTGTATCAACACCTATTC
>2853_Selatosomus_coreanus_Mt_Seolak_GW
AACTCTATATTTCCTTTTTGGTGCCTGAGCAGGAATGTTAGGAACTTCTCTTAGCCTTCTGATTCGAGCTGAACTAGGTAACCCCGGCTCTCTCATTGGTAATGACCAAATTTACAACGTAATCGTTACAGCCCACGCCTTTATTATAATTTTCTTCATAGTAATACCAATCATAATTGGAGGATTCGGAAATTGACTTGTACCTCTAATACTAGGAGCCCCTGATATAGCATTCCCACGTATAAACAACATAAGATTCTGATTCCTACCACCCTCTCTATCACTTTTACTAATAAGAAGAATCGTGGAAAACGGAGCAGGAACAGGGTGAACTGTCTACCCTCCTCTCTCAGCCAATATTGCCCATAGAGGGTCATCAGTTGACCTGGCAATTTTCAGATTACACCTAGCAGGGATTTCATCAATCCTAGGGGCCGTAAATTTCATCTCAACAGTTATTAATATACGATCAACTGGAATTACCTTTGACCGAATACCTTTATTTGTATGAGCAGTAGCTATTACAGCCCTCCTTCTACTCTTATCTCTGCCGGTCCTAGCAGGAGCAATTACAATATTACTAACCGATCGAAACCTAAATACATCCTTTTTTGACCCCGCGGGGGGAGGAGACCCAATTCTGTATCAACACCTATTC
>2876_Selatosomus_coreanus_Mt_Bukhan_GG
AACTCTATATTTCCTTTTTGGTGCCTGAGCAGGAATGTTAGGAACTTCTCTTAGCCTTCTGATTCGAGCTGAACTAGGTAACCCCGGCTCTCTCATTGGTAATGACCAAATTTACAACGTAATCGTTACAGCCCACGCCTTTATTATAATTTTCTTCATAGTAATACCAATCATAATTGGAGGATTCGGAAATTGACTTGTACCTCTAATACTAGGAGCCCCTGATATAGCATTCCCACGTATAAACAACATAAGATTCTGATTCCTACCACCCTCTCTATCACTTTTACTAATAAGAAGAATCGTGGAAAACGGAGCAGGAACAGGATGAACTGTCTACCCTCCTCTCTCAGCCAATATTGCCCATAGAGGATCATCAGTTGACCTGGCAATTTTCAGATTACACCTAGCAGGGATTTCATCAATCCTAGGGGCCGTAAATTTCATCTCAACAGTTATTAATATACGATCAACTGGAATTACCTTTGACCGAATACCTTTATTTGTATGAGCAGTAGCTATTACAGCCCTCCTTCTACTCTTATCTCTGCCGGTCCTAGCAGGAGCAATTACAATATTACTAACCGATCGAAACCTAAATACATCCTTTTTTGACCCCGCGGGGGGAGGAGACCCAATTCTGTATCAACACCTATTC
>2882_Selatosomus_coreanus_Mt_Seolak_GW
AACTCTATATTTCCTTTTTGGTGCCTGAGCAGGAATGTTAGGAACTTCTCTTAGCCTTCTGATTCGAGCTGAACTAGGTAACCCCGGCTCTCTCATTGGTAATGACCAAATTTACAACGTAATCGTTACAGCCCACGCCTTTATTATAATTTTCTTCATAGTAATACCAATCATAATTGGAGGATTCGGAAATTGACTCGTACCTCTAATACTAGGGGCCCCTGATATAGCATTCCCACGTATAAACAACATAAGATTCTGATTCCTGCCACCCTCTCTATCACTTTTACTAATAAGAAGAATCGTGGAAAACGGAGCAGGAACAGGATGAACTGTCTACCCCCCTCTCTCAGCCAATATTGCCCATAGAGGATCATCAGTTGACCTGGCAATTTTCAGATTACACCTAGCAGGGATTTCGTCAATCCTAGGGGCCGTAAATTTCATCTCAACAGTTATTAATATACGATCAACTGGAATTACCTTTGACCGAATACCTTTATTTGTATGAGCAGTGGCTATTACAGCCCTCCTTCTACTCTTATCTCTGCCGGTCCTAGCAGGAGCAATCACGATGTTACTAACCGATCGAAACCTAAATACATCCTTTTTTGACCCCGCGGGGGGAGGAGACCCAATTCTGTATCAACACCTATTC
>2883_Selatosomus_coreanus_Mt_Seolak_GW
AACTCTATATTTCCTTTTTGGTGCCTGAGCAGGAATGTTAGGAACTTCTCTTAGCCTTCTGATTCGAGCTGAACTAGGTAACCCCGGCTCTCTCATTGGTAATGACCAAATTTACAACGTAATCGTTACAGCCCACGCCTTTATTATAATTTTCTTCATAGTAATACCAATCATAATTGGAGGATTCGGAAATTGACTCGTACCTCTAATACTAGGGGCCCCTGATATAGCATTCCCACGTATAAACAACATAAGATTCTGATTCCTGCCACCCTCTCTATCACTTTTACTAATAAGAAGAATCGTGGAAAACGGAGCAGGAACAGGATGAACTGTCTACCCCCCTCTCTCAGCCAATATTGCCCATAGAGGATCATCAGTTGACCTGGCAATTTTCAGATTACACCTAGCAGGGATTTCGTCAATCCTAGGGGCCGTAAATTTCATCTCAACAGTTATTAATATACGATCAACTGGAATTACCTTTGACCGAATACCTTTATTTGTATGAGCAGTGGCTATTACAGCCCTCCTTCTACTCTTATCTCTGCCGGTCCTAGCAGGAGCAATCACGATGTTACTAACCGATCGGAACCTAAATACATCCTTTTTTGACCCCGCGGGGGGAGGAGACCCAATTCTGTATCAACACCTATTC
>2884_Selatosomus_coreanus_Mt_Seolak_GW
AACTCTATATTTCCTTTTTGGTGCCTGAGCAGGAATGTTAGGAACTTCTCTTAGCCTTCTGATTCGAGCTGAACTAGGTAACCCCGGCTCTCTCATTGGTAATGACCAAATTTACAACGTAATCGTTACAGCCCACGCCTTTATTATAATTTTCTTCATAGTAATACCAATCATAATTGGAGGATTCGGAAATTGACTCGTACCTCTAATACTAGGAGCCCCTGATATAGCATTCCCACGTATAAACAACATAAGATTCTGATTCCTGCCACCCTCTCTATCACTTTTACTAATAAGAAGAATCGTGGAAAACGGAGCAGGAACAGGGTGAACTGTCTACCCCCCTCTCTCAGCCAATATTGCCCATAGAGGATCATCAGTTGACCTGGCAATTTTCAGATTACACCTAGCAGGGATTTCGTCAATCCTAGGAGCCGTAAATTTCATCTCAACAGTTATTAATATACGATCAACTGGAATTACCTTTGACCGAATACCTTTATTTGTATGAGCAGTAGCTATTACAGCCCTCCTTCTACTCTTATCTCTGCCGGTCCTAGCAGGAGCAATCACGATGTTACTAACCGATCGAAACCTAAATACATCCTTTTTTGACCCCGCGGGGGGAGGAGACCCAATTCTGTATCAACACCTATTC
>2885_Selatosomus_coreanus_Mt_Seolak_GW
AACTCTATATTTCCTTTTTGGTGCCTGAGCAGGAATGTTAGGAACTTCTCTTAGCCTTCTGATTCGAGCTGAACTAGGTAACCCCGGCTCTCTCATTGGTAATGACCAAATTTACAACGTAATCGTTACAGCCCACGCCTTTATTATAATTTTCTTCATAGTAATACCAATCATAATTGGAGGATTCGGAAATTGACTCGTACCTCTAATACTAGGAGCCCCTGATATAGCATTCCCACGTATAAACAACATAAGATTCTGATTCCTGCCACCCTCTCTATCACTTTTACTAATAAGAAGAATCGTGGAAAACGGAGCAGGAACAGGGTGAACTGTCTACCCCCCTCTCTCAGCCAATATTGCCCATAGAGGATCATCAGTTGACCTGGCAATTTTCAGATTACACCTAGCAGGGATTTCGTCAATCCTAGGGGCCGTAAATTTCATCTCAACAGTTATTAATATACGATCAACTGGAATTACCTTTGACCGAATACCTTTATTTGTATGAGCAGTAGCTATTACAGCCCTCCTTCTACTCTTATCTCTGCCGGTCCTAGCAGGAGCAATCACGATGTTACTAACCGATCGAAACCTAAATACATCCTTTTTTGACCCCGCGGGGGGAGGAGACCCAATTCTGTATCAACACCTATTC
>2886_Selatosomus_coreanus_Mt_Seolak_GW
AACTCTATATTTCCTTTTTGGTGCCTGAGCAGGAATGTTAGGAACTTCTCTTAGCCTTCTGATTCGAGCTGAACTAGGTAACCCCGGCTCTCTCATTGGTAATGACCAAATTTACAACGTAATCGTTACAGCCCACGCCTTTATTATAATTTTCTTCATAGTAATACCAATCATAATTGGAGGATTCGGAAATTGACTCGTACCTCTAATACTAGGAGCCCCTGATATAGCATTCCCACGTATAAACAACATAAGATTCTGATTCCTGCCACCCTCTCTATCACTTTTACTAATAAGAAGAATCGTGGAAAACGGAGCAGGAACAGGGTGAACTGTCTACCCCCCTCTCTCAGCCAATATTGCCCATAGAGGATCATCAGTTGACCTGGCAATTTTCAGATTACACCTAGCAGGGATTTCGTCAATCCTAGGGGCCGTAAATTTCATCTCAACAGTTATTAATATACGATCAACTGGAATTACCTTTGACCGAATACCTTTATTTGTATGAGCAGTAGCTATTACAGCCCTCCTTCTACTCTTATCTCTGCCGGTCCTAGCAGGAGCAATCACGATGTTACTAACCGATCGAAACCTAAATACATCCTTTTTTGACCCCGCGGGGGGAGGAGACCCAATTCTGTATCAACACCTATTC
>2894_Selatosomus_coreanus_Mt_Bukhan_GG
AACTCTATATTTCCTTTTTGGTGCCTGAGCAGGAATGTTAGGAACTTCTCTTAGCCTTCTGATTCGAGCTGAACTAGGTAACCCCGGCTCTCTCATTGGTAATGACCAAATTTACAACGTAATCGTTACAGCCCACGCCTTTATTATAATTTTCTTCATAGTAATACCAATCATAATTGGAGGATTCGGAAATTGACTCGTACCTCTAATACTAGGAGCCCCTGATATAGCATTCCCACGTATAAACAACATAAGATTCTGATTCCTACCACCCTCTCTATCACTTTTACTAATAAGAAGAATCGTGGAAAACGGAGCAGGAACAGGATGAACTGTCTACCCCCCTCTCTCAGCCAATATTGCCCATAGAGGATCATCAGTTGATCTGGCAATTTTCAGATTACACCTAGCAGGGATTTCATCAATCCTAGGGGCCGTAAATTTCATCTCAACAGTTATTAATATACGATCAACTGGAATTACCTTTGACCGAATACCTTTATTTGTATGAGCAGTAGCTATTACAGCCCTCCTTCTACTCTTATCTCTGCCGGTCCTAGCAGGAGCAATTACAATATTACTAACCGATCGAAACCTAAATACATCCTTTTTTGACCCCGCGGGGGGAGGAGACCCAATTCTGTATCAACACCTATTC
>2895_Selatosomus_coreanus_Mt_Bukhansan_G
AACTCTATATTTCCTTTTTGGTGCCTGAGCAGGAATGTTAGGAACTTCTCTTAGCCTTCTAATTCGAGCTGAACTAGGTAACCCCGGCTCTCTCATTGGTAATGACCAAATTTACAACGTAATCGTTACAGCCCACGCCTTTATTATAATTTTCTTCATAGTAATACCAATCATAATTGGAGGATTCGGAAATTGACTTGTACCTCTAATACTAGGAGCCCCTGATATAGCATTCCCACGTATAAACAACATAAGATTCTGATTCCTACCACCCTCTCTATCACTTTTACTAATAAGAAGAATCGTGGAAAACGGAGCAGGAACAGGATGAACTGTCTACCCCCCTCTCTCAGCCAATATTGCCCATAGAGGATCATCAGTTGACCTGGCAATTTTCAGATTACACCTAGCAGGGATTTCATCAATCCTAGGGGCCGTAAATTTCATCTCAACAGTTATTAATATACGATCAACTGGAATTACCTTTGACCGAATACCTTTATTTGTATGAGCAGTAGCTATTACAGCCCTCCTTCTACTCTTATCTCTGCCGGTCCTAGCAGGAGCAATTACAATATTACTAACCGATCGAAACCTAAATACATCCTTTTTTGACCCCGCGGGGGGAGGAGACCCAATTCTGTATCAACACCTATTC
>2898_Selatosomus_coreanus_Mt_Bukhan_GG
AACTCTATATTTCCTTTTTGGTGCCTGAGCAGGAATGTTAGGAACTTCTCTTAGCCTTCTGATTCGAGCTGAACTAGGTAACCCCGGCTCTCTCATTGGTAATGACCAAATTTACAACGTAATCGTTACAGCCCACGCCTTTATTATAATTTTCTTCATAGTAATACCAATCATAATTGGAGGATTCGGAAATTGACTTGTACCTCTAATACTAGGAGCCCCTGATATAGCATTCCCACGTATAAACAACATAAGATTCTGATTCCTACCACCCTCTCTATCACTTTTACTAATAAGAAGAATCGTGGAAAACGGAGCAGGAACAGGGTGAACTGTCTACCCCCCTCTCTCAGCCAATATTGCCCATAGAGGATCATCAGTTGACCTGGCAATTTTCAGATTACACCTAGCAGGGATTTCATCAATCCTAGGGGCCGTAAATTTCATCTCAACAGTTATTAATATACGATCAACTGGAATTACCTTTGACCGAATACCTTTATTTGTATGAGCAGTAGCTATTACAGCCCTCCTTCTACTCTTATCTCTGCCGGTCCTAGCAGGAGCAATTACAATATTACTAACCGATCGAAACCTAAATACATCCTTTTTTGACCCCGCGGGGGGAGGAGACCCAATTCTGTATCAACACCTATTC
>2995_Selatosomus_coreanus_Korea
AACTCTATATTTCCTTTTTGGTGCCTGAGCAGGAATGTTAGGAACTTCTCTTAGCCTTCTGATTCGAGCTGAACTAGGTAACCCCGGCTCTCTCATTGGTAATGACCAAATTTACAACGTAATCGTTACAGCCCACGCCTTTATTATAATTTTCTTCATAGTAATACCAATCATAATTGGGGGATTCGGAAATTGACTCGTACCtCTAATACTAGGaGCCCCTGATATAGCATTCCCACGTATAAACAACATAAGATTCTGATTCCTACCACCCTCTCTATCACTTTTACTAATAAGAAGAATCGTAGAAAACGGAGCAGGAACAGGATGAACTGTCTACCCCCCTCTCTCAGCCAATATCGCCCATAGAGGATCATCAGTTGACCTGGCAATTTTCAGATTACACCTAGCAGGGATTTCGTCAATCCTAGGAGCCGTAAATTTCATCTCAACAGTTATTAATATACGATCAACTGGAATTACCTTTGACCGAATACCTTTATTTGTATGAGCAGTAGCTATTACAGCCCTCCTTCTACTCTTATCTCTGCCGGTCCTAGCAGGAGCAATCACGATATTACTGACCGATCGAAACCTAAATACATCCTTTTTCGACCCCGCGGGGGGAGGAGACCCAATTCTGTATCAACACCTATTC
>3029_Selatosomus_coreanus_Mt_Seolak_GW
AACTCTATATTTCCTTTTTGGTGCCTGAGCAGGAATGTTAGGAACTTCTCTTAGCCTTCTGATTCGAGCTGAACTAGGTAACCCCGGCTCTCTCATTGGTAATGACCAAATTTACAACGTAATCGTTACAGCCCACGCCTTTATTATAATTTTCTTCATAGTAATACCAATCATAATTGGAGGATTCGGAAATTGACTTGTACCTCTAATACTAGGAGCCCCTGATATAGCATTCCCACGTATAAACAACATAAGATTCTGATTCCTACCACCCTCTCTATCACTTTTACTAATAAGAAGAATCGTGGAAAACGGAGCAGGAACAGGGTGAACTGTCTACCCTCCTCTCTCAGCCAATATTGCCCATAGAGGGTCATCAGTTGACCTGGCAATTTTCAGATTACACCTAGCAGGGATTTCATCAATCCTAGGGGCCGTAAATTTCATCTCAACAGTTATTAATATACGATCAACTGGAATTACCTTTGACCGAATACCTTTATTTGTATGAGCAGTAGCTATTACAGCCCTCCTTCTACTCTTATCTCTGCCGGTCCTAGCAGGAGCAATTACAATATTACTAACCGATCGAAACCTAAATACATCCTTTTTTGACCCCGCGGGGGGAGGAGACCCAATTCTGTATCAACACCTATTC
>3030_Selatosomus_coreanus_Misiryeong_GW
AACTCTATATTTCCTTTTTGGTGCCTGAGCAGGAATGTTAGGAACTTCTCTTAGCCTTCTGATTCGAGCTGAACTAGGTAACCCCGGCTCTCTCATTGGTAATGACCAAATTTACAACGTAATCGTTACAGCCCACGCCTTTATTATAATTTTCTTCATAGTAATACCAATCATAATTGGAGGATTCGGAAATTGACTTGTACCTCTAATACTAGGGGCCCCTGATATGGCATTCCCACGTATAAACAACATAAGATTCTGATTCCTGCCACCCTCTCTATCACTTTTACTAATAAGAAGAATCGTGGAAAACGGAGCAGGAACAGGATGAACTGTCTACCCCCCTCTCTCAGCCAATATTGCCCATAGAGGATCATCAGTTGACCTGGCAATTTTCAGATTACACCTAGCAGGGATTTCGTCAATCCTAGGGGCCGTAAATTTCATCTCAACAGTTATTAATATACGATCAACTGGAATTACCTTTGACCGAATACCTTTATTTGTATGAGCAGTAGCTATTACAGCCCTCCTTCTACTCTTATCTCTGCCGGTCCTAGCAGGAGCAATCACGATGTTACTAACCGATCGAAACCTAAATACATCCTTTTTTGACCCCGCGGGGGGAGGAGACCCAATTCTGTATCAACACCTATTC
>3031_Selatosomus_coreanus_Mt_Bukhan_GG
AACTCTATATTTCCTTTTTGGTGCCTGAGCAGGAATGTTAGGAACTTCTCTTAGCCTTCTGATTCGAGCTGAACTAGGTAACCCCGGCTCTCTCATTGGTAATGACCAAATTTACAACGTAATCGTTACAGCCCACGCCTTTATTATAATTTTCTTCATAGTAATACCAATCATAATTGGAGGATTCGGAAATTGACTTGTACCTCTAATACTAGGAGCCCCTGATATAGCATTCCCACGTATAAACAACATAAGATTCTGATTCCTACCACCCTCTCTATCACTTTTACTAATAAGAAGAATCGTGGAAAACGGAGCAGGAACAGGATGAACTGTCTACCCTCCTCTCTCAGCCAATATTGCCCATAGAGGATCATCAGTTGACCTGGCAATTTTCAGATTACACCTAGCAGGGATTTCATCAATCCTAGGGGCCGTAAATTTCATCTCAACAGTTATTAATATACGATCAACTGGAATTACCTTTGACCGAATACCTTTATTTGTATGAGCAGTAGCTATTACAGCCCTCCTTCTACTCTTATCTCTGCCGGTCCTAGCAGGAGCAATTACAATATTACTAACCGATCGAAACCTAAATACATCCTTTTTTGACCCCGCGGGGGGAGGAGACCCAATTCTGTATCAACACCTATTC
>3034_Selatosomus_coreanus_Mt_Seolak_GW
AACTCTATATTTCCTTTTTGGTGCCTGAGCAGGAATGTTAGGAACTTCTCTTAGCCTTCTGATTCGAGCTGAACTAGGTAACCCCGGCTCTCTCATTGGTAATGACCAAATTTACAACGTAATCGTTACAGCCCACGCCTTTATTATAATTTTCTTCATAGTAATACCAATCATAATTGGAGGATTCGGAAATTGACTCGTACCTCTAATACTAGGAGCCCCTGACATAGCATTCCCACGTATAAACAACATAAGATTCTGATTCCTGCCACCCTCTCTATCACTTTTACTAATAAGAAGAATCGTGGAAAACGGAGCAGGAACAGGATGAACTGTCTACCCTCCTCTCTCAGCCAATATTGCCCATAGAGGATCATCAGTTGACCTGGCAATTTTCAGATTACACCTAGCAGGGATTTCGTCAATCCTAGGAGCCGTAAATTTCATCTCAACAGTTATTAATATACGATCAACTGGAATTACCTTTGACCGAATACCTTTATTTGTATGAGCAGTGGCTATTACAGCCCTCCTTCTACTCTTATCTCTGCCGGTCCTAGCAGGAGCAATCACGATATTACTAACCGATCGAAACCTAAATACATCCTTTTTTGACCCCGCGGGGGGAGGAGACCCAATTCTGTATCAACACCTATTC
>2608_Selatosomus_coreanus_Primorsky_Russia
AACTCTATATTTCCTTTTTGGTGCCTGAGCAGGAaTGTTAGGAACTTCTCTTAGCCTTCTGATTCGAGCTGAACTAGGTAACCCCGGCTCTCTCATTGGTAATGACCAAATTTACAACGTAATCGTTACAGCCCACGCCTTTATTATAATTTTCTTCATAGTAATACCAATCATAATTGGAGGATTCGGAAATTGACTTGTACCTCTAATACTAGGAGCCCCTGATATAGCATTCCCACGTATAAACAACATAAGATTCTGATTCCTACCCCCCTCCCTATCACTTTTACTAATAAGAAGAATCGTGGAAAACGGAGCAGGAACAGGATGAACTGTCTACCCCCCTCTCTCAGCCAATATTGCCCATAGAGGGTCATCAGTTGACCTGGCAATTTTCAGATTACACCTAGCAGGGATTTCGTCAATCCTAGGGGCCGTAAATTTCATCTCGACAGTTATTAATATACGATCAACTGGAATTACCTTTGACCGAATACCTTTATTTGTATGAGCAGTAGCTATCACAGCCCTCCTTCTACTCTTATCTCTACCGGTCCTAGCAGGAGCAATCACAATATTACTAACCGATCGAAACCTAAATACATCCTTTTTTGATCCCGCGGGAGGAGGAGACCCAATTCTGTATCAACACCTATTC
>3204_Selatosomus_coreanus_Muju_JB
AACTCTATATTTCCTTTTTGGTGCCTGAGCAGGAATGTTAGGAACTTCTCTTAGCCTTCTGATTCGAGCTGAACTAGGTAACCCCGGCTCTCTCATTGGTAATGACCAAATTTACAACGTAATCGTTACAGCCCACGCCTTTATTATAATTTTCTTCATAGTAATACCAATCATAATTGGGGGATTCGGAAATTGACTCGTACCTCTAATACTAGGAGCCCCTGATATAGCATTCCCACGTATAAACAACATAAGATTCTGATTCCTACCACCCTCTCTATCACTTTTACTAATAAGAAGAATCGTGGAAAACGGAGCAGGAACAGGATGAACTGTCTACCCCCCTCTCTCAGCCAATATCGCCCATAGAGGATCATCAGTTGACCTGGCAATTTTCAGATTACACCTAGCAGGGATTTCGTCAATCCTAGGGGCCGTAAATTTCATCTCAACAGTTATTAATATACGATCAACTGGAATTACCTTTGACCGAATACCTTTATTTGTATGAGCAGTAGCTATTACAGCCCTCCTTCTACTCTTATCTCTGCCGGTCCTAGCAGGAGCAATCACGATGTTACTGACCGATCGAAACCTAAATACATCCTTTTTTGACCCCGCGGGAGGAGGAGACCCAATTCTGTATCAACACCTATTC
>3205_Selatosomus_coreanus_Injae_GW
AACTCTATATTTCCTTTTTGGTGCCTGAGCAGGAATGTTAGGAACTTCTCTTAGCCTTCTGATTCGAGCTGAACTAGGTAACCCCGGCTCTCTCATTGGTAATGACCAAATTTACAACGTAATCGTTACAGCCCACGCCTTTATTATAATTTTCTTCATAGTAATACCAATCATAATTGGAGGATTCGGAAATTGACTCGTACCTCTAATACTAGGGGCCCCTGATATAGCATTCCCACGTATAAACAACATAAGATTCTGATTCCTGCCACCCTCTCTATCACTTTTACTAATAAGAAGAATCGTGGAAAACGGAGCAGGAACAGGATGAACTGTCTACCCCCCTCTCTCAGCCAATATTGCCCATAGAGGATCATCAGTTGACCTGGCAATTTTCAGATTACACCTAGCAGGGATTTCGTCAATCCTAGGAGCCGTAAATTTCATCTCAACAGTTATTAATATACGATCAACTGGAATTACCTTTGACCGAATACCTTTATTTGTATGAGCAGTGGCTATTACAGCCCTCCTTCTACTCTTATCTCTGCCGGTCCTAGCAGGAGCAATCACGATGTTACTAACCGATCGAAACCTAAATACATCCTTTTTTGACCCCGCGGGGGGAGGAGACCCAATTCTGTACCAACACCTATTC
>3293_Selatosomus_coreanus_Uljin_GB
AACTCTATATTTCCTTTTTGGTGCCTGAGCAGGAATGTTAGGAACTTCTCTTAGCCTTCTGATTCGAGCTGAACTAGGTAACCCCGGCTCTCTCATTGGTAATGACCAAATTTACAACGTAATCGTTACAGCCCACGCCTTTATTATAATTTTCTTCATAGTAATACCAATCATAATTGGAGGATTCGGAAATTGACTCGTACCTCTAATACTAGGGGCCCCTGATATAGCATTCCCACGTATAAACAACATAAGATTCTGATTCCTACCACCCTCTCTATCACTTTTACTAATAAGAAGAATCGTGGAAAACGGAGCAGGAACAGGATGAACTGTCTACCCCCCTCTCTCAGCCAACATCGCCCATAGAGGATCATCAGTTGACCTGGCAATTTTCAGATTACACCTAGCAGGGATTTCGTCAATCCTAGGGGCCGTAAATTTCATCTCAACAGTTATTAATATACGATCAACTGGAATTACCTTTGACCGAATACCTTTATTTGTATGAGCAGTAGCTATTACAGCCCTCCTTCTACTCTTATCTCTGCCGGTCCTAGCAGGAGCAATCACGATGTTACTGACCGATCGAAACCTAAATACATCCTTTTTTGACCCCGCGGGGGGAGGAGACCCAATTCTGTATCAACACCTATTC
>3341_Selatosomus_coreanus_Mt_Sokri_Cheongju_CB
----CTATATTTCCTTTTTGGTGCCTGAGCAGGAATGTTAGGAACTTCTCTTAGCCTTCTGATTCGAGCTGAACTAGGTAACCCCGGCTCTCTCATTGGTAATGACCAAATTTACAACGTAATCGTTACAGCCCACGCCTTTATTATAATTTTCTTCATAGTAATACCAATCATAATTGGGGGATTCGGAAATTGACTCGTACCTCTAATACTAGGAGCCCCTGATATAGCATTCCCACGTATAAACAACATAAGATTCTGATTCCTACCACCCTCTCTATCACTTTTACTAATAAGAAGAATCGTGGAAAACGGAGCAGGAACAGGATGAACTGTCTACCCCCCTCTCTCAGCCAATATCGCCCATAGAGGATCATCAGTTGACCTGGCAATTTTCAGATTACACCTAGCAGGGATTTCGTCAATCCTAGGGGCCGTAAATTTCATCTCAACAGTTATTAATATACGATCAACTGGAATTACCTTTGACCGAATACCTTTATTTGTATGAGCAGTAGCTATTACAGCCCTCCTTCTACTCTTATCTCTGCCGGTCCTAGCAGGAGCAATCACGATGTTACTGACCGATCGAAACCTAAATACATCCTTTTTTGACCCCGCGGGGGGAGGAGACCCAATTCTGTATCAACACCTATTC
>3397_Selatosomus_coreanus_Bonghwa_GB
AACTCTATATTTCCTTTTTGGTGCCTGAGCAGGAATGTTAGGAACTTCTCTTAGCCTTCTGATTCGAGCTGAACTAGGTAACCCCGGCTCTCTCATTGGTAATGACCAAATTTACAACGTAATCGTTACAGCCCACGCCTTTATTATAATTTTCTTCATAGTAATACCAATCATAATTGGAGGATTCGGAAATTGACTTGTGCCTCTAATACTAGGGGCCCCTGATATAGCATTCCCACGTATAAACAACATAAGATTCTGATTCCTACCTCCCTCTCTATCACTTTTACTAATAAGAAGAATCGTGGAAAACGGGGCAGGAACAGGATGAACTGTCTACCCCCCTCTCTCAGCCAATATTGCCCATAGAGGATCATCAGTTGACCTGGCAATTTTCAGATTACACCTAGCAGGGATTTCGTCAATCCTAGGGGCCGTAAATTTCATCTCAACAGTTATTAATATACGATCAACTGGGATTACCTTTGACCGAATACCTTTATTTGTATGAGCAGTAGCTATTACAGCCCTCCTTCTACTCTTATCTCTGCCGGTCCTAGCAGGAGCAATCACGATGTTACTAACCGATCGAAACCTAAATACATCCTTTTTTGACCCCGCGGGGGGAGGAGACCCAATTCTGTATCAACACCTATTC
>3398_Selatosomus_coreanus_Bonghwa_GB
AACTCTATATTTCCTTTTTGGTGCCTGAGCAGGAATGTTAGGAACTTCTCTTAGCCTTCTGATTCGAGCTGAACTAGGTAACCCCGGCTCTCTCATTGGTAATGACCAAATTTACAACGTAATCGTTACAGCCCACGCCTTTATTATAATTTTCTTCATAGTAATACCAATCATAATTGGAGGATTCGGAAATTGACTCGTACCTCTAATACTAGGAGCCCCTGATATAGCATTCCCACGTATAAACAACATAAGATTCTGATTCCTACCACCCTCTCTATCACTTTTACTAATAAGAAGAATCGTGGAAAACGGGGCAGGAACAGGATGAACTGTTTACCCCCCTCTCTCAGCCAATATTGCCCATAGAGGATCATCAGTTGACCTGGCAATTTTCAGATTACACCTAGCAGGGATTTCGTCAATCCTAGGGGCCGTAAATTTCATCTCAACAGTTATTAATATACGATCAACTGGAATTACCTTTGATCGAATACCTTTATTTGTATGAGCAGTAGCTATTACAGCCCTCCTTCTACTCTTATCTCTGCCGGTCCTAGCAGGAGCAATCACGATGTTACTAACCGATCGAAACCTAAATACATCCTTTTTTGACCCCGCGGGGGGAGGAGATCCAATTCTGTATCAACACCTATTC
>3406_Selatosomus_coreanus_Bonghwa_GB
AACTCTATATTTCCTTTTTGGTGCCTGAGCAGGAATGTTAGGAACTTCTCTTAGCCTTCTGATTCGAGCTGAACTAGGTAACCCCGGCTCTCTCATTGGTAATGACCAAATTTACAACGTAATCGTTACAGCCCACGCCTTTATTATAATTTTCTTCATAGTAATACCAATCATAATTGGAGGATTCGGAAATTGACTCGTGCCTCTAATACTAGGGGCCCCTGATATAGCATTCCCACGTATAAACAACATAAGATTCTGATTCCTACCTCCCTCTCTATCACTTTTACTAATAAGAAGAATCGTGGAAAACGGGGCAGGAACAGGATGAACTGTCTACCCCCCTCTCTCAGCCAATATTGCCCATAGAGGATCATCAGTTGACCTGGCAATTTTCAGATTACACCTAGCAGGGATTTCGTCAATCCTAGGGGCCGTAAATTTCATCTCAACAGTTATTAATATACGATCAACTGGGATTACCTTTGACCGAATACCTTTATTTGTATGAGCAGTAGCTATTACAGCCCTCCTTCTACTCTTATCTCTGCCGGTCCTAGCAGGAGCAATCACGATGTTACTAACCGATCGAAACCTAAATACATCCTTTTTTGACCCCGCGGGGGGAGGAGACCCAATTCTGTATCAACACCTATTC
>3415_Selatosomus_coreanus_Bonghwa_GB
AACTCTATATTTCCTTTTTGGTGCCTGAGCAGGAATGTTAGGAACTTCTCTTAGCCTTCTGATTCGAGCTGAACTAGGTAACCCCGGCTCTCTCATTGGTAATGACCAAATTTACAACGTAATCGTTACAGCCCACGCCTTTATTATAATTTTCTTCATAGTAATACCAATCATAATTGGAGGATTCGGAAATTGACTCGTGCCTCTAATACTAGGGGCCCCTGATATAGCATTCCCACGTATAAACAACATAAGATTCTGGTTCCTACCCCCCTCTCTATCACTTTTACTAATAAGAAGAATCGTAGAAAACGGGGCAGGAACAGGATGAACTGTCTACCCCCCTCTCTCAGCCAATATTGCCCATAGAGGATCATCAGTTGACCTGGCAATTTTCAGATTACACCTAGCAGGGATTTCGTCAATCCTAGGGGCCGTAAATTTCATCTCAACAGTTATTAATATACGATCAACTGGGATTACCTTTGACCGAATGCCTTTATTTGTATGAGCAGTAGCTATTACAGCCCTCCTTCTACTCCTATCTCTGCCGGTCCTAGCAGGAGCAATTACGATGTTACTAACCGATCGAAACCTAAATACATCCTTTTTTGACCCCGCGGGGGGAGGAGACCCAATTCTGTATCAACACCTATTC
>3418_Selatosomus_coreanus_Bonghwa_GB
AACTCTATATTTCCTTTTTGGTGCCTGAGCAGGAATGTTAGGAACTTCTCTTAGCCTTCTGATTCGAGCTGAACTAGGTAACCCCGGCTCTCTCATTGGTAATGACCAAATTTACAACGTAATCGTTACAGCCCACGCCTTTATTATAATTTTCTTCATAGTAATACCAATCATAATTGGAGGATTCGGAAATTGACTCGTACCTCTAATACTAGGGGCCCCTGATATAGCATTCCCACGTATAAACAACATAAGATTCTGATTCCTACCACCCTCTCTATCACTTTTACTAATAAGAAGAATCGTGGAAAACGGGGCAGGAACAGGATGAACTGTTTACCCCCCTCTCTCAGCCAATATTGCCCATAGAGGATCATCAGTTGACCTGGCAATTTTCAGATTACACCTAGCAGGGATTTCGTCAATCCTAGGGGCCGTAAATTTCATCTCAACAGTTATTAATATACGATCAACTGGAATTACCTTTGACCGAATACCTTTATTTGTATGAGCAGTAGCTATTACAGCCCTCCTTCTACTCTTATCTCTGCCGGTCCTAGCAGGAGCAATCACGATATTACTAACCGATCGAAACCTAAATACATCCTTTTTTGACCCCGCGGGGGGAGGAGACCCAATTCTGTATCAACACCTATTC
>3423_Selatosomus_coreanus_Bonghwa_GB
AACTCTATATTTCCTTTTTGGTGCCTGAGCAGGAATGTTAGGAACTTCTCTTAGCCTTCTGATTCGAGCTGAACTAGGTAACCCCGGCTCTCTCATTGGTAATGACCAAATTTACAACGTAATCGTTACAGCCCACGCCTTTATTATAATTTTCTTCATAGTAATACCAATCATAATTGGAGGATTCGGAAATTGACTTGTGCCTCTAATACTAGGGGCCCCTGATATAGCATTCCCACGTATAAACAACATAAGATTCTGATTCCTACCTCCCTCTCTATCACTTTTACTAATAAGAAGAATCGTGGAAAACGGGGCAGGAACAGGATGAACTGTCTACCCCCCTCTCTCAGCCAATATTGCCCATAGAGGATCATCAGTTGACCTGGCAATTTTCAGATTACACCTAGCAGGGATTTCGTCAATCCTAGGGGCCGTAAATTTCATCTCAACAGTTATTAATATACGATCAACTGGGATTACCTTTGACCGAATACCTTTATTTGTATGAGCAGTAGCTATTACAGCCCTCCTTCTACTCTTATCTCTGCCGGTCCTAGCAGGAGCAATCACGATGTTACTAACCGATCGAAACCTAAATACATCCTTTTTTGACCCCGCGGGGGGAGGAGACCCAATTCTGTATCAACACCTATTC
>876_Selatosomus_coreanus_Phyeongchang_GW
AACTCTATACTTCCTTTTTGGTGCCTGAGCAGGAATGTTAGGAACTTCTCTTAGCCTTCTAATTCGAGCTGAACTAGGAAACCCCGGCTCTCTCATTGGTAATGACCAAATCTACAACGTAATCGTAACAGCCCATGCCTTTATTATAATTTTCTTCATAGTAATACCAATCATAATTGGGGGATTCGGAAATTGATTAGTACCTCTTATACTTGGGGCCCCTGATATAGCATTCCCACGAATAAACAATATAAGATTCTGATTCCTCCCACCCTCTCTATCACTTTTACTAATAAGAAGAATCGTAGAAAATGGTGCTGGTACAGGATGAACAGTCTACCCCCCACTATCAGCCAATATTGCTCACAGAGGGTCGTCGGTCGATCTGGCAATTTTCAGATTACATTTAGCAGGAATCTCGTCAATCTTGGGAGCTGTAAATTTCATCTCAACAGTTATTAATATACGGTCAACTGGAATCACCTTTGACCGAATACCTTTATTTGTATGGGCCGTAGCAATTACAGCCCTCCTTCTACTCTTATCTCTACCAGTTTTAGCAGGAGCAATTACAATACTACTAACCGATCGAAACCTAAATACATCTTTTTTCGATCCCGCCGGAGGAGGAGATCCAATTCTATACCAACACCTATTC
>2623_Selatosomus_coreanus_Bonghwa_GB
AACTCTATACTTCCTTTTTGGTGCCTGAGCAGGAATGTTAGGAACTTCTCTTAGCCTTCTAATTCGAGCTGAACTAGGAAACCCCGGCTCTCTCATTGGTAATGACCAAATCTACAACGTAATCGTAACAGCCCATGCCTTTATTATAATTTTCTTCATAGTAATACCAATCATAATTGGGGGATTCGGAAATTGATTAGTACCTCTTATACTTGGGGCCCCTGATATAGCATTCCCACGAATAAACAATATAAGATTCTGATTCCTCCCACCCTCTCTATCACTTTTACTAATAAGAAGAATCGTAGAAAATGGTGCTGGTACAGGATGAACAGTCTACCCCCCACTATCAGCCAATATTGCTCACAGAGGGTCGTCGGTCGATCTGGCAATTTTCAGATTACATTTAGCAGGAATCTCGTCAATCTTGGGAGCTGTAAATTTCATCTCAACAGTTATTAATATACGGTCAACTGGAATCACCTTTGATCGAATACCTTTATTTGTATGGGCCGTAGCAATTACAGCCCTCCTTCTACTCTTATCTCTACCAGTTTTAGCAGGAGCAATTACAATACTACTAACCGATCGAAACCTAAATACATCTTTTTTCGATCCCGCCGGAGGGGGAGATCCAATTCTATACCAACACCTATTC
>2795_Selatosomus_coreanus_Mt_Odae_GW
AACTCTATACTTCCTTTTTGGTGCCTGAGCAGGAATGTTAGGAACTTCTCTTAGCCTTCTAATTCGAGCTGAACTAGGAAACCCCGGCTCTCTCATTGGTAATGACCAAATCTACAACGTAATCGTAACAGCCCATGCCTTTATTATAATTTTCTTCATAGTAATACCAATCATAATTGGGGGATTCGGAAATTGATTAGTACCTCTAATACTTGGGGCCCCTGATATAGCATTCCCACGAATAAACAATATAAGATTCTGATTCCTCCCACCCTCTCTATCACTTTTACTAATAAGAAGAATCGTAGAAAATGGTGCAGGTACAGGATGAACAGTCTACCCCCCACTATCAGCCAATATTGCTCACAGAGGGTCGTCGGTCGATCTGGCAATTTTCAGATTACATTTAGCAGGAATCTCGTCAATCTTGGGAGCTGTAAATTTCATCTCAACAGTTATTAATATACGGTCAACTGGAATCACCTTTGATCGAATACCTTTATTTGTATGGGCCGTAGCAATTACAGCCCTCCTTCTACTCTTATCTCTACCAGTTTTAGCAGGAGCAATTACAATACTACTAACCGATCGAAACCTAAATACATCTTTTTTCGATCCCGCCGGAGGAGGAGATCCAATTCTATACCAACACCTATTC
>3010_Selatosomus_coreanus_larva_Jangpyeong_GW
AACTCTATACTTCCTTTTTGGTGCCTGAGCAGGAATGTTAGGAACTTCTCTTAGCCTTCTAATTCGAGCTGAACTAGGAAACCCCGGCTCTCTCATTGGTAATGACCAAATCTACAACGTAATCGTAACAGCCCATGCCTTTATTATAATTTTCTTCATAGTAATACCAATCATAATTGGGGGATTCGGAAATTGATTAGTACCTCTAATACTTGGGGCCCCTGATATAGCATTCCCACGAATAAACAATATAAGATTCTGATTCCTCCCACCCTCTCTATCACTTTTACTAATAAGAAGAATCGTAGAAAATGGTGCAGGCACAGGATGAACAGTCTACCCCCCACTATCAGCCAATATTGCTCACAGAGGGTCGTCGGTCGATCTGGCAATTTTCAGATTACATTTAGCAGGAATCTCGTCAATCTTGGGAGCTGTAAATTTCATCTCAACAGTTATTAATATACGGTCAACTGGAATCACCTTTGATCGAATACCTTTATTTGTATGAGCCGTAGCAATTACAGCCCTCCTTCTACTCTTATCTCTACCAGTTTTAGCAGGAGCAATTACAATACTACTAACCGATCGAAACCTAAATACATCTTTTTTCGATCCCGCCGGAGGAGGAGATCCAATTCTATACCAACACCTATTC
>3203_Selatosomus_coreanus_Mt_Jeombong_Injae_GW
--------------------------------------------CTTCTCTTAGCCTTCTAATTCGAGCTGAACTAGGAAACCCCGGCTCTCTCATTGGTAATGACCAAATCTACAACGTAATCGTAACAGCCCATGCCTTTATTATAATTTTCTTCATAGTAATACCAATCATAATTGGGGGATTCGGAAATTGATTAGTACCTCTAATACTTGGGGCCCCTGATATAGCATTCCCACGAATAAACAATATAAGATTCTGATTCCTCCCACCCTCTCTATCACTTTTACTAATAAGAAGAATCGTAGAAAATGGTGCAGGTACAGGATGAACAGTCTACCCCCCACTATCAGCCAATATTGCTCACAGAGGGTCGTCGGTCGATCTGGCAATTTTCAGACTACATTTAGCAGGAATCTCGTCAATCTTGGGAGCTGTAAATTTCATCTCAACAGTTATTAATATACGGTCAACTGGAATCACCTTTGATCGAATACCTTTATTTGTATGGGCCGTAGCAATTACAGCCCTCCTTCTACTCTTATCTCTACCAGTTTTAGCAGGAGCAATTACAATACTACTAACCGATCGAAACCTAAATACATCTTTTTTCGATCCCGCCGGAGGAGGAGATCCAATTCTATACCAACACCTATTC
>3308_Selatosomus_reichardti_Yongpyeong_GW
AACTCTATACTTCCTTTTTGGTGCCTGAGCAGGAATGTTAGGAACTTCTCTTAGCCTTCTAATTCGAGCTGAACTAGGAAACCCCGGCTCTCTCATTGGTAATGACCAAATCTACAACGTAATCGTAACAGCCCATGCCTTTATTATAATTTTCTTCATAGTAATACCAATCATAATTGGGGGATTCGGAAATTGATTAGTACCTCTAATACTTGGGGCCCCTGATATAGCATTCCCACGAATAAACAATATAAGATTCTGATTCCTCCCACCCTCTCTATCACTTTTACTAATAAGAAGAATCGTAGAAAATGGTGCAGGTACAGGATGAACAGTCTACCCCCCACTATCAGCCAATATTGCTCACAGAGGGTCGTCGGTCGATCTGGCAATTTTCAGATTACATTTAGCAGGAATCTCGTCAATCTTGGGAGCTGTAAATTTCATCTCAACAGTTATTAATATACGGTCAACTGGAATCACCTTTGATCGAATACCTTTATTTGTATGGGCCGTAGCAATTACAGCCCTCCTTCTACTCTTATCTCTACCAGTTTTAGCAGGAGCAATTACAATACTTCTAACCGATCGAAACCTAAATACATCTTTTTTCGATCCCGCCGGAGGAGGGGACCCAATTCTATACCAACACCTATTC
>3498_Selatosomus_coreanus_HN_N_Korea
AACTCTATACTTCCTTTTTGGTGCCTGAGCAGGAATGTTAGGAACTTCTCTTAGCCTTCTAATTCGAGCTGAACTAGGAAACCCCGGCTCTCTCATTGGTAATGACCAAATCTACAACGTAATCGTAACAGCCCATGCCTTTATTATAATTTTCTTCATAGTAATACCAATCATAATTGGGGGATTCGGAAATTGATTAGTACCTCTAATACTTGGGGCCCCTGATATAGCATTCCCACGAATAAACAATATAAGATTCTGATTCCTCCCACCCTCTCTATCACTTTTACTAATAAGAAGAATCGTAGAAAATGGTGCAGGTACAGGATGAACAGTCTACCCCCCACTATCAGCCAATATTGCTCACAGAGGGTCGTCGGTCGATCTGGCAATTTTCAGATTACATTTAGCAGGAATCTCGTCAATCTTGGGAGCTGTAAATTTCATCTCAACAGTTATTAATATACGGTCAACTGGAATCACCTTTGATCGAATACCTTTATTTGTATGGGCCGTAGCAATTACAGCCCTCCTTCTACTCTTATCTCTACCAGTTCTAGCAGGAGCAATTACAATACTACTAACCGATCGAAACCTAAATACATCTTTTTTCGATCCCGCCGGAGGAGGAGATCCAATTCTATACCAACACCTATTC
>3499_Selatosomus_coreanus_HN_N_Korea
AACTCTATACTTCCTTTTTGGTGCCTGAGCAGGAATGTTAGGGACTTCTCTTAGCCTTCTAATTCGAGCTGAACTAGGAAACCCCGGCTCTCTCATTGGTAATGACCAAATCTACAACGTAATCGTAACAGCCCATGCCTTTATTATAATTTTCTTCATAGTAATACCAATCATAATTGGGGGATTCGGAAATTGATTAGTACCTCTAATACTTGGGGCCCCTGATATAGCATTCCCACGAATAAACAATATAAGATTCTGATTCCTCCCACCCTCTCTATCACTTTTACTAATAAGAAGAATCGTAGAAAATGGTGCAGGTACAGGATGAACAGTCTACCCCCCACTATCAGCCAATATTGCTCACAGAGGGTCGTCGGTCGATCTGGCAATTTTCAGATTACATTTAGCAGGAATCTCGTCAATCTTGGGAGCTGTAAATTTCATCTCAACAGTTATTAATATACGGTCAACTGGAATCACCTTTGATCGAATACCTTTATTTGTATGGGCCGTAGCAATTACAGCCCTCCTTCTACTCTTATCTCTACCAGTTCTAGCAGGAGCAATTACAATACTACTAACCGATCGAAACCTAAATACATCTTTTTTCGATCCCGCCGGAGGAGGAGATCCAATTCTATACCAACACCTATTC
>2399_Selatosomus_coreanus_Primorsky_Russia
-------------------------------------------------------------------------------------------------------------------------------------------------------------------------------------------------------------------------------------------------------------------------------------------------------------------------GGTGCAGGTACAGGATGAACAGTCTACCCCCCACTATCAGCCAATATTGCTCACAGAGGGTCGTCGGTCGATCTGGCAATTTTCAGATTACATCTAGCAGGAATTTCGTCAATCTTGGGAGCTGTAAATTTCATCTCAACAGTTATTAATATACGGTCAACTGGAATCACCTTtgATCGAATACCTTTATTTGTATGGGCCGTAGCAATTACAGCCCTCCTTCTACTATTATCTCTCCCAGTTCTAGCAGGAGCAATCACAATATTACTAACCGATCGAAACCTAAATACATCTTTCTTCGATCCCGCCGGAGGAGGAGACCCAATTCTATACCAACACCTATTC
>3419_Selatosomus_koryeoensis_Bonghwa_GB
AACTCTATACTTCCTTTTTGGTGCTTGAGCAGGAATACTAGGAACATCTCTTAGTCTTTTGATTCGAGCTGAACTTGGTAATCCCGGATCTCTTATCGGTAACGACCAAATTTACAACGTAATTGTTACAGCCCACGCCTTCATTATAATTTTCTTCATAGTAATGCCGATCATGATCGGAGGATTCGGAAACTGACTTGTACCCCTTATACTTGGAGCCCCTGATATAGCATTCCCACGAATAAACAACATAAGATTCTGATTCCTTCCACCTTCCCTATCACTATTATTAATAAGAAGAATTGTGGAAAACGGGGCAGGAACAGGATGAACTGTCTATCCTCCCCTCTCAGCTAACATTGCGCATAGAGGGTCCTCAGTTGATCTAGCAATTTTTAGCCTTCATCTTGCAGGAATCTCATCAATCCTAGGAGCAGTAAACTTTATTTCAACAGTAATCAATATACGATCAACCGGAATCACCTTTGACCGAATACCTCTATTTGTATGAGCAGTAGCAATCACAGCTTTACTTCTCCTTCTATCCCTACCAGTACTAGCAGGAGCAATCACAATACTATTAACTGACCGAAATCTAAATACATCCTTCTTTGACCCCGCAGGGGGAGGCGATCCAATTTTATATCAACATCTATTC
>854_Selatosomus_koryeoensis_Uiwang_GG
AACTCTATACTTCCTTTTTGGTGCTTGAGCAGGAATACTAGGAACATCTCTTAGTCTTTTAATTCGAGCTGAACTTGGTAATCCCGGATCCCTTATCGGTAACGACCAAATCTACAACGTAATTGTTACAGCCCACGCCTTCATTATAATTTTCTTCATGGTGATACCAATCATAATTGGGGGATTCGGAAACTGGCTTGTACCCCTTATACTCGGGGCCCCTGATATGGCATTCCCACGAATAAACAACATAAGATTCTGATTCCTACCCCCTTCCCTGTCACTACTGCTAATAAGAAGAATTGTGGAAAATGGAGCAGGAACAGGATGAACTGTTTACCCTCCCCTCTCAGCTAACATTGCGCACAGAGGATCATCAGTTGATCTAGCAATTTTTAGTCTTCATCTTGCAGGGATCTCATCAATCCTAGGAGCAGTAAACTTTATTTCAACAGTAATCAACATACGATCAGCCGGAATCACCTTCGATCGAATACCTTTATTTGTATGGGCAGTAGCTATTACAGCTTTACTTCTCCTTCTATCCCTGCCAGTACTAGCAGGAGCAATCACAATACTATTAACCGACCGAAATTTAAACACATCATTCTTCGACCCTGCAGGGGGAGGAGATCCAATTTTATACCAACACCTATTC
>2511_Selatosomus_koryeoensis_Mt_Gyeryong_Gongju_CN
AACTCTATACTTCCTTTTTGGTGCTTGAGCAGGAATACTAGGAACATCTCTTAGTCTTTTAATTCGAGCTGAACTTGGTAATCCCGGATCCCTTATCGGTAACGACCAAATCTACAACGTAATTGTTACAGCCCACGCCTTCATTATAATTTTCTTCATGGTGATACCAATCATAATTGGGGGATTCGGAAACTGGCTTGTACCCCTTATACTCGGGGCCCCTGATATGGCATTCCCACGAATAAACAACATAAGATTCTGATTCCTACCCCCTTCCCTGTCACTACTGCTAATAAGAAGAATTGTGGAAAATGGAGCAGGAACAGGATGAACTGTTTACCCTCCCCTCTCAGCTAACATTGCGCACAGAGGATCATCAGTTGATCTAGCAATTTTTAGTCTTCATCTTGCAGGGATCTCATCAATCCTAGGAGCAGTAAACTTTATTTCAACAGTAATCAACATACGATCAGCCGGAATCACCTTCGATCGAATACCTTTATTTGTATGGGCAGTAGCTATTACAGCTTTACTTCTCCTTCTATCCCTGCCAGTACTAGCAGGAGCAATCACAATACTATTAACCGACCGAAATTTAAACACATCATTCTTCGACCCTGCAGGGGGAGGAGATCCAATTTTATACCAACACCTATTC
>3053_Selatosomus_koryeoensis_Mt_Gyeryong_Gongju_CN
AACTCTATACTTCCTTTTTGGTGCTTGGGCAGGAATACTAGGAACATCTCTTAGTCTTTTAATTCGAGCTGAACTTGGTAATCCCGGATCCCTTATCGGTAACGACCAAATCTACAACGTAATTGTTACAGCCCACGCCTTCATTATAATCTTCTTCATGGTGATACCAATCATAATTGGGGGATTCGGAAACTGGCTTGTACCCCTTATACTCGGGGCCCCTGATATAGCATTCCCACGAATAAACAACATAAGATTCTGATTCCTACCCCCTTCCCTGTCACTACTGCTAATAAGAAGAATTGTGGAAAATGGAGCAGGAACAGGATGAACTGTTTACCCTCCCCTCTCAGCTAACATTGCGCACAGAGGATCATCAGTTGATCTAGCAATTTTTAGTCTTCATCTTGCAGGGATCTCATCAATCCTAGGAGCAGTAAACTTTATTTCAACAGTAATCAACATACGATCAGCCGGAATCACCTTCGATCGAATACCTTTATTTGTATGGGCAGTAGCTATTACAGCTTTACTTCTCCTTCTATCCCTGCCAGTACTAGCAGGAGCAATCACAATACTATTAACCGACCGAAATTTAAACACATCATTCTTCGACCCTGCAGGGGGAGGAGATCCAATTTTATACCAACACCTATTC
>3054_Selatosomus_koryeoensis_Mt_Gyeryong_Gongju_CN
AACTCTATACTTCCTTTTTGGTGCTTGGGCAGGAATACTAGGAACATCTCTTAGTCTTTTAATTCGAGCTGAACTTGGTAATCCCGGATCCCTTATCGGTAACGACCAAATCTACAACGTAATTGTTACAGCCCACGCCTTCATTATAATTTTCTTCATGGTGATACCAATCATAATTGGGGGATTCGGAAACTGGCTTGTACCCCTTATACTCGGGGCCCCTGATATAGCATTCCCACGAATAAACAACATAAGATTCTGATTCCTACCCCCTTCCCTGTCACTACTGCTAATAAGAAGAATTGTGGAAAATGGAGCAGGAACAGGATGAACTGTTTACCCTCCCCTCTCAGCTAACATTGCGCACAGAGGATCATCAGTTGATCTAGCAATTTTTAGTCTTCATCTTGCAGGGATCTCATCAATCCTAGGAGCAGTAAACTTTATTTCAACAGTAATCAACATACGATCAGCCGGAATCACCTTCGATCGAATACCTTTATTTGTATGGGCAGTAGCTATTACAGCTTTACTTCTCCTTCTATCCCTGCCAGTACTAGCAGGAGCAATCACAATACTATTAACCGACCGAAATTTAAACACATCATTCTTCGACCCTGCAGGGGGAGGAGATCCAATTTTATACCAACACCTATTC
>3028_Selatosomus_koryeoensis_Misiryeong_GW
AACTCTATACTTCCTTTTTGGTGCTTGAGCAGGAATACTAGGAACATCTCTTAGTCTTTTAATTCGAGCTGAACTTGGTAATCCCGGATCCCTTATCGGTAACGACCAAATCTACAACGTAATTGTTACAGCCCACGCCTTCATTATAATTTTCTTCATGGTGATACCAATCATAATTGGGGGATTCGGAAACTGGCTTGTACCCCTTATACTCGGGGCCCCTGATATGGCATTCCCACGAATAAACAACATAAGATTCTGATTCCTACCCCCTTCCCTGTCACTACTGCTAATAAGAAGAATTGTGGAAAATGGAGCAGGAACAGGATGAACTGTTTACCCTCCCCTCTCAGCTAACATTGCGCACAGAGGATCATCAGTTGATCTAGCAATTTTTAGTCTTCATCTTGCAGGGATCTCATCAATCCTAGGAGCAGTAAACTTTATTTCAACAGTAATCAACATACGATCAGCCGGAATCACCTTCGATCGAATACCTTTATTTGTATGGGCAGTAGCTATTACAGCTTTACTTCTCCTTCTATCCCTGCCAGTACTAGCAGGAGCAATCACAATACTATTAACCGACCGAAATTTAAACACATCATTCTTCGACCCTGCAGGGGGAGGAGATCCAATTTTATACCAACACCTATTC
>3339_Selatosomus_koryeoensis_Mt_Jiri_Namwon_JN
AACTCTATACTTCCTTTTTGGTGCTTGAGCAGGAATACTAGGAACATCTCTTAGTCTTTTAATTCGAGCTGAACTTGGTAATCCCGGATCCCTTATCGGTAACGACCAAATCTACAACGTAATTGTTACAGCCCACGCCTTCATTATAATTTTCTTCATGGTGATACCAATCATAATTGGGGGATTCGGAAACTGGCTTGTACCCCTTATACTCGGGGCCCCTGATATGGCATTCCCACGAATAAACAACATAAGATTCTGATTCCTACCCCCTTCCCTGTCACTACTGCTAATAAGAAGAATTGTGGAAAATGGAGCAGGAACAGGATGAACTGTTTACCCTCCCCTCTCAGCTAACATTGCGCACAGAGGATCATCAGTTGATCTAGCAATTTTTAGTCTTCATCTTGCAGGGATCTCATCAATCCTAGGAGCAGTAAACTTTATTTCAACAGTAATCAACATACGATCAGCCGGAATCACCTTCGATCGAATACCTTTATTTGTATGGGCAGTAGCTATTACAGCTTTACTTCTCCTTCTATCCCTGCCAGTACTAGCAGGAGCAATCACAATACTATTAACCGACCGAAATTTAAACACATCATTCTTCGACCCTGCAGGGGGAGGAGATCCAATTTTATACCAACACCTATTC
>3340_Selatosomus_koryeoensis_Mt_Jiri_Namwon_JN
AACTCTATACTTCCTTTTTGGTGCTTGAGCAGGAATACTAGGAACATCTCTTAGTCTTTTAATTCGAGCTGAACTTGGTAATCCCGGATCCCTTATCGGTAACGACCAAATCTACAACGTAATTGTTACAGCCCACGCCTTCATTATAATTTTCTTCATGGTGATACCAATCATAATTGGGGGATTCGGAAACTGGCTTGTACCCCTTATACTCGGGGCCCCTGATATGGCATTCCCACGAATAAACAACATAAGATTCTGATTCCTACCCCCTTCCCTGTCACTACTGCTAATAAGAAGAATTGTGGAAAATGGAGCAGGAACAGGATGAACTGTTTACCCTCCCCTCTCAGCTAACATTGCGCACAGAGGATCATCAGTTGATCTAGCAATTTTTAGTCTTCATCTTGCAGGGATCTCATCAATCCTAGGAGCAGTAAACTTTATTTCAACAGTAATCAACATACGATCAGCCGGAATCACCTTCGATCGAATACCTTTATTTGTATGGGCAGTAGCTATTACAGCTTTACTTCTCCTTCTATCCCTGCCAGTACTAGCAGGAGCAATCACAATACTATTAACCGACCGAAATTTAAACACATCATTCTTCGACCCTGCAGGGGGAGGAGATCCAATTTTATACCAACACCTATTC
>3328_Selatosomus_grandis_Chuncheon_GW
AACTCTATACTTCCTTTTTGGTGCCTGGTCAGGAATACTAGGAACATCCCTTAGCCTACTAATTCGAGCTGAACTAGGAAACCCTGGATCTCTTATTGGTAATGACCAAATCTATAACGTAATCGTTACAGCCCACGCCTTCATTATAATTTTCTTCATAGTTATACCAATCATAATTGGGGGATTCGGAAACTGATTAGTTCCCCTAATACTTGGAGCTCCTGATATAGCATTCCCACGAATAAACAACATAAGATTCTGATTTCTTCCTCCTTCTTTATCCCTCTTATTAATAAGAAGAATTGTAGAAAATGGAGCAGGAACAGGATGAACTGTTTACCCGCCCCTTTCAGCCAACATTGCCCACAGAGGGTCATCAGTTGACCTAGCAATTTTTAGTTTACATCTAGCAGGAATCTCATCAATCCTAGGAGCAGTAAACTTTATTTCAACAGTAATTAATATACGATCAACTGGAATTACCTTTGACCGAATACCTCTATTCGTATGAGCTGTAGCTATTACAGCTTTACTTCTTCTTTTATCCCTACCCGTTCTGGCAGGGGCAATCACAATACTATTAACTGACCGAAATTTAAATACATCTTTCTTTGACCCCGCGGGTGGAGGAGACCCCATTCTATACCAACACTTATTC
>3306_Selatosomus_sp_2_JJ
AACTCTATACTTCCTTTTTGGTGCCTGGTCAGGAATACTAGGAACATCCCTTAGCCTACTAATTCGAGCTGAACTAGGAAATCCTGGATCTCTCATTGGTAACGACCAAATCTACAACGTAATCGTTACAGCCCACGCCTTCATTATAATTTTCTTCATAGTAATACCAATCATAATTGGGGGATTCGGAAACTGATTAGTTCCCCTGATACTTGGAGCTCCTGATATAGCATTCCCACGAATAAATAACATAAGATTCTGATTTCTCCCTCCTTCTTTATCTCTCTTATTAATAAGAAGAATCGTAGAAAATGGAGCAGGAACAGGATGAACTGTTTATCCACCCCTGTCAGCTAATATTGCCCACAGAGGATCATCAGTCGACCTAGCAATTTTTAGTTTACATCTAGCAGGGATCTCATCAATCCTAGGAGCAGTAAACTTTATCTCAACAGTAATTAATATACGATCAACTGGAATTACCTTTGACCGAATACCTCTATTCGTGTGAGCTGTAGCTATTACAGCCTTACTACTTCTGCTATCCCTACCGGTACTAGCAGGAGCAATCACAATACTATTAACTGACCGAAATTTAAATACCTCTTTCTTTGACCCCGCAGGTGGGGGAGACCCCATTCTATATCAACACTTATTC
>Selatosomus_aeneus_Austria_HM542061
------------------------------------------------------------------------------------------------------------------------------------------------------------------------------------------------------------------------------------------------------------------------------------------------------------------------------TGGAACGGGATGAACTGTTTACCCGCCACTATCAGCCAATATTGCTCACAGAGGATCGTCRGTTGATCTGGCAATTTTCAGATTACATCTRGCAGGAATCTCRYCRATCTTAGGAGCYGTAAATTTCATCTCAACRGTTATTAATATACGATCAACTGGAATCACCTTTGATCGAATACCTTTATTTGTATGGGCTGTAGCTATTACAGCCCTTCTTCTACTCTTATCTCTTCCRGTCCTGGCAGGAGCAATTACAATRTTACTAACYGATCGAAACCTTAATACATCYTTTTTCGACCCYGCMGGRGGAGGRGACCCAATTYTATATCAACACCTATTC
>2835_Paraphotistus_impressus_sachalinensis_Mt_Seolak_GW
AACTCTATACTTCCTTTTTGGAGCATGAGCTGGAATGCTAGGCACCTCTCTTAGCCTTTTAATTCGAGCCGAACTAGGAAACCCCGGATCACTAATCGGGAATGACCAAATTTACAACGTTATTGTCACAGCCCATGCCTTTATCATAATTTTCTTTATAGTTATACCAATCATGATTGGGGGGTTCGGAAACTGATTAGTACCTCTAATGCTAGGAGCCCCAGATATAGCATTCCCCCGAATAAACAATATAAGATTCTGATTTTTACCACCATCCCTGAGACTTCTTCTAATAAGAAGAATTGTAGAAAATGGAGCAGGAACAGGATGAACTGTTTACCCGCCTCTCTCTGCCAACATTGCCCACAGAGGTTCTTCTGTCGATTTAGCAATTTTCAGACTCCATCTTGCTGGAATTTCATCAATTCTAGGGGCTGTAAACTTCATCTCAACAGTTATTAATATACGATCAACTGGAATCACCTTTGATCGAATACCATTATTTGTTTGAGCAGTAGCAATCACAGCTCTTCTTCTCCTATTGTCACTCCCAGTTCTAGCAGGAGCAATCACAATACTACTAACAGACCGAAATTTAAATACATCCTTCTTTGACCCTGCCGGAGGAGGAGATCCAATCCTTTACCAACACCTATTT
>3421_Paraphotistus_impressus_sachalinensis_Bonghwa_GB
---TCTATACTTCCTTTTTGGAGCATGAGCTGGAATGCTAGGCACCTCTCTTAGCCTTTTAATTCGAGCCGAACTAGGAAACCCCGGATCACTAATCGGGAATGACCAAATTTACAACGTTATTGTCACAGCCCATGCCTTTATCATAATTTTCTTTATAGTTATACCAATCATGATTGGGGGGTTCGGAAACTGATTAGTGCCCCTAATACTAGGAGCCCCAGATATAGCATTCCCCCGAATAAACAATATAAGATTCTGATTTTTACCACCATCCCTGAGACTTCTTCTAATAAGAAGAATTGTAGAAAATGGAGCAGGAACAGGATGAACTGTTTACCCACCTCTCTCTGCCAACATTGCCCACAGAGGTTCTTCTGTCGATTTAGCAATTTTCAGACTCCATCTTGCTGGAATTTCATCAATTCTAGGAGCTGTAAACTTCATCTCAACAGTTATTAATATACGATCAACTGGAATCACCTTTGATCGAATACCATTATTTGTTTGAGCAGTAGCAATCACAGCTCTTCTTCTCCTATTGTCACTCCCAGTTCTAGCAGGAGCAATCACCATACTACTAACAGACCGAAATTTAAATACATCCTTCTTTGACCCTGCCGGAGGAGGAGATCCAATCCTTTACCAACACCTATTT
>2104_Prosternon_aurichalceum_Punggi_GB
TACCTTATACTTCCTATTCGGAGCATGATCCGGAATATTAGGAACTTCATTGAGATTATTAATTCGGGCAGAGCTAGGAAACCCAGGATCATTAATCGGAAACGACCAAATCTATAATGTTATTGTCACAGCACACGCTTTTATCATAATTTTCTTTATAGTTATACCAATCATAATCGGAGGATTCGGAAACTGACTAGTACCTTTAATACTAGGGGCCCCTGATATAGCATTTCCCCGAATAAATAATATGAGATTTTGATTTCTACCACCATCATTATCTTTACTATTAATAAGAAGAATTGTAGAAAATGGAGCAGGAACAGGATGAACAGTCTATCCACCTCTCTCAGCAAATATTGCTCACAGTGGGTCATCAGTTGACCTTGCCATTTTCAGTTTACATTTAGCAGGAATTTCATCAATCCTAGGAGCAGTAAATTTTATTTCTACTGTAATTAATATACGAACAACAGGAATAACCTTTGATCGAATACCATTATTTGTATGAGCCGTTGCAATCACAGCCCTTCTTTTATTATTGTCTCTTCCAGTTCTAGCCGGAGCAATTACAATACTATTAACTGACCGAAATTTAAATACATCATTTTTTGACCCTGCAGGAGGAGGGGACCCTATCTTATACCAACACTTATTT
>2695_Prosternon_aurichalceum_Mt_Hwaya_GG
TACCTTATACTTCCTATTCGGAGCATGATCCGGAATACTAGGAACTTCATTGAGATTATTAATTCGGGCAGAACTAGGAAACCCAGGATCATTAATCGGAAACGACCAAATCTACAATGTTATTGTTACAGCACACGCTTTTATCATAATTTTCTTCATGGTTATACCAATCATAATCGGGGGATTCGGAAACTGACTAGTACCTTTAATACTAGGGGCCCCTGATATAGCATTTCCCCGAATAAATAATATGAGATTTTGATTTCTACCACCCTCATTATCTTTACTATTAATAAGAAGAATTGTAGAAAACGGAGCAGGAACAGGCTGAACAGTTTATCCCCCTCTCTCAGCAAACATTGCTCACAGTGGGTCGTCAGTTGACCTTGCCATTTTCAGTTTACATTTAGCAGGAATTTCATCAATCCTAGGAGCAGTAAATTTCATTTCAACTGTAATTAATATACGAACAACAGGAATAACCTTTGATCGAATACCATTATTCGTATGAGCCGTTGCAATCACAGCTCTTCTTTTATTATTATCCCTTCCAGTTCTAGCCGGAGCAATTACAATACTATTGACTGACCGAAATTTAAATACATCATTTTTTGACCCTGCAGGAGGAGGGGACCCTATTTTATACCAACACTTATTT
>2861_Prosternon_aurichalceum_Misiryeung_GW
AACCTTATACTTCCTATTCGGAGCATGATCCGGAATACTAGGAACTTCATTGAGATTATTAATTCGGGCAGAACTAGGAAACCCAGGATCATTAATCGGAAACGACCAAATCTACAATGTTATTGTTACAGCACACGCTTTTATCATAATTTTCTTCATGGTTATACCAATCATAATCGGGGGATTCGGAAACTGACTAGTACCTTTAATACTAGGGGCCCCTGATATAGCATTTCCCCGAATAAATAATATGAGATTTTGATTTCTACCACCCTCATTATCTTTACTATTAATAAGAAGAATTGTAGAAAACGGGGCAGGAACAGGCTGAACAGTTTATCCCCCTCTCTCAGCAAACATTGCTCACAGTGGGTCGTCAGTTGACCTTGCCATTTTCAGTTTACATTTAGCAGGAATTTCATCAATCCTAGGAGCAGTAAATTTCATTTCAACTGTAATTAATATACGAACAACAGGAATAACCTTTGATCGAATACCATTATTCGTATGAGCCGTTGCAATCACAGCTCTTCTTTTATTATTATCCCTTCCAGTTCTAGCCGGAGCAATTACAATACTATTGACTGACCGAAATTTAAATACATCATTTTTTGACCCTGCAGGAGGAGGGGACCCTATTTTATACCAACACTTATTT
>2862_Prosternon_aurichalceum_Misiryeung_GW
AACCTTATACTTCCTATTCGGAGCATGATCCGGAATACTAGGAACTTCATTGAGATTATTAATTCGGGCAGAACTAGGAAACCCAGGATCATTAATCGGAAACGACCAAATCTACAATGTTATTGTTACAGCACACGCTTTTATCATAATTTTCTTCATGGTTATACCAATCATAATCGGGGGATTCGGAAACTGACTAGTACCTTTAATACTAGGGGCCCCTGATATAGCATTTCCCCGAATAAATAATATGAGATTTTGATTTCTACCACCCTCATTATCTTTACTATTAATAAGAAGAATTGTAGAAAACGGAGCAGGAACAGGCTGAACAGTTTATCCCCCTCTCTCAGCAAACATTGCTCACAGTGGGTCATCAGTTGACCTTGCCATTTTCAGTTTACATTTAGCAGGAATTTCATCAATCCTAGGAGCAGTAAATTTCATTTCAACTGTAATTAATATACGAACAACAGGAATAACCTTTGATCGAATACCATTATTCGTATGAGCCGTTGCAATCACAGCTCTTCTTTTATTATTATCCCTTCCAGTTCTAGCCGGAGCAATTACAATACTATTGACTGACCGAAATTTAAATACATCATTTTTTGACCCTGCAGGAGGAGGGGACCCTATTTTATACCAACACTTATTT
>2866_Prosternon_aurichalceum_Mt_Bukhan_GG
AACCTTATACTTCCTATTCGGAGCATGATCCGGAATACTAGGAACTTCATTGAGATTATTAATTCGGGCAGAACTAGGAAACCCAGGATCATTAATCGGAAACGACCAAATCTACAATGTTATTGTTACAGCACACGCTTTTATTATAATTTTCTTCATGGTTATACCAATCATAATCGGGGGATTCGGAAACTGACTAGTACCTTTAATACTAGGGGCCCCTGATATAGCATTTCCCCGAATAAATAATATGAGATTTTGATTTCTACCACCCTCATTATCTTTACTATTAATAAGAAGAATTGTAGAAAACGGAGCAGGAACAGGCTGAACAGTTTATCCCCCTCTCTCAGCAAACATTGCTCACAGTGGGTCGTCAGTTGACCTTGCCATTTTCAGTTTACATTTAGCAGGAATTTCATCAATCCTAGGAGCAGTAAATTTCATTTCAACTGTAATTAATATACGAACAACAGGAATAACCTTTGATCGAATACCATTATTCGTATGAGCCGTTGCAATCACAGCTCTTCTTTTATTATTATCCCTTCCAGTTCTAGCCGGAGCAATTACAATACTATTGACTGACCGAAATTTAAATACATCATTTTTTGACCCTGCAGGAGGAGGAGACCCTATTTTATACCAACACTTATTT
>3024_Prosternon_aurichalceum_Baekdamsa_GW
TACCTTATACTTCCTATTCGGAGCATGATCCGGGATATTAGGAACTTCATTGAGATTACTAATTCGGGCAGAACTAGGAAACCCAGGATCATTAATCGGAAACGACCAAATCTACAATGTTATTGTTACAGCACACGCTTTTATTATAATTTTCTTTATAGTTATACCAATCATAATCGGAGGATTCGGAAACTGACTAGTACCTTTAATATTAGGAGCCCCTGATATAGCATTTCCCCGAATAAATAATATGAGATTTTGATTTTTACCACCATCACTATCTTTACTACTAATAAGAAGAATTGTAGAAAATGGAGCAGGAACAGGCTGAACAGTTTATCCCCCTCTCTCAGCAAACATTGCTCACAGTGGATCATCAGTTGATCTTGCCATTTTCAGTTTACATTTAGCAGGAATTTCATCAATCCTAGGAGCTGTAAATTTCATTTCAACTGTAATTAATATACGAACAACAGGTATAACCTTTGATCGAATACCATTATTTGTATGAGCCGTTGCAATCACAGCTCTTCTTTTATTATTGTCCCTTCCAGTCCTAGCCGGAGCAATTACAATATTATTAACTGATCGAAATTTAAATACATCATTTTTTGACCCTGCAGGAGGAGGGGACCCTATTTTATACCAACACTTATTT
>3232_Prosternon_auricalceum_Gongju_CN
TACCTTATACTTCCTATTCGGAGCATGATCCGGAATATTAGGAACTTCATTGAGATTATTAATTCGGGCAGAGCTAGGAAACCCAGGATCATTAATCGGAAACGACCAAATCTATAATGTTATTGTCACAGCACACGCTTTTATCATAATTTTCTTTATAGTTATACCAATCATAATCGGAGGGTTCGGAAACTGATTAGTACCCTTAATACTAGGGGCCCCTGATATAGCATTTCCCCGAATAAATAATATGAGATTTTGATTTCTGCCACCATCCTTATCTTTACTATTAATAAGAAGAATTGTAGAAAATGGAGCAGGAACAGGTTGAACAGTCTATCCCCCTCTCTCAGCAAACATTGCTCACAGTGGGTCATCAGTTGACCTTGCCATTTTCAGTTTACATTTAGCAGGAATTTCATCAATCCTGGGAGCAGTAAATTTTATCTCAACTGTAATTAATATACGAACAACAGGAATAACCTTTGATCGAATACCATTATTTGTATGAGCCGTTGCAATCACAGCCCTTCTTTTACTATTGTCTCTTCCAGTTCTAGCCGGAGCAATTACAATATTATTAACTGACCGAAATTTAAATACATCATTTTTTGACCCTGCAGGAGGAGGGGACCCTATTTTATACCAACACTTATTT
>2585_Prosteron_sericeum_Sakhalin_Russia
TACACTATACTTCCTATTCGGAGCATGATCCGGAATATTAGGAACTTCATTAAGATTATTAATTCGGGCAGAACTAGGAAATCCAGGATCATTAATCGGAAATGATCAAATTTACAACGTTATTGTCACAGCACACGCTTTCATTATAATTTTCTTCATAGTTATACCAATCATAATTGGGGGATTCGGAAATTGATTAGTACCTTTAATATTAGGAGCCCCAGATATAGCATTCCCACGAATAAATAACATAAGATTTTGATTTCTACCCCCATCATTATCTCTACTATTAATAAGAAGAATTGTAGAAAATGGAGCAGGAACAGGCTGAACAGTCTATCCTCCCCTCTCAGCAAACATTGCCCATAGAGGATCCTCAGTTGATCTTGCCATTTTCAGCTTACATTTAGCAGGAATTTCATCAATCTTAGGGGCAGTAAATTTTATTTCAACCGTAATCAATATACGAACAACAGGAATTACATTTGACCGAATACCATTATTCGTTTGAGCTGTAGCAATTACAGCTCTTCTTTTATTACTATCTTTACCAGTTCTAGCTGGAGCAATCACAATACTACTAACTGACCGAAATCTAAATACATCATTTTTTGATCCTGCCGGAGGAGGAGACCCAATCCTTTACCAGCACTTATTC
>3494_Prosternon_tesselatum_Russia
TACACTATACTTCCTATTCGGAGCATGATCCGGAATATTAGGAACCTCATTAAGACTATTAATTCGGGCAGAACTAGGAAATCCAGGATCATTGATCGGAAATGACCAAATTTACAACGTTATTGTCACAGCACACGCTTTTATTATAATTTTCTTTATAGTTATACCAATCATAATTGGAGGATTCGGAAATTGATTAGTCCCCCTAATACTAGGAGCCCCTGATATAGCATTTCCACGAATAAATAACATAAGATTCTGATTTCTTCCACCATCATTATCTCTACTATTAATAAGAAGAATTGTAGAAAATGGAGCAGGAACAGGCTGAACAGTCTATCCTCCTCTATCAGCAAACATCGCCCATAGTGGATCCTCAGTTGATCTTGCCATTTTCAGCCTACACTTAGCAGGAATTTCATCAATTTTAGGAGCAGTGAATTTCATTTCCACTGTTATCAACATACGAACAACAGGAATTACCTTCGACCGAATACCATTATTTGTATGAGCTGTAGCTATCACAGCTCTTCTATTATTGCTATCTCTACCAGTACTAGCGGGGGCAATCACAATATTATTAACTGACCGAAATCTAAACACATCATTTTTTGATCCTGCAGGAGGGGGAGACCCAATCCTATACCAACACCTATTC
>3497_Prosternon_tesselatum_Russia
TACACTATACTTCCTATTCGGAGCATGATCCGGAATATTAGGAACCTCATTAAGACTATTAATTCGGGCAGAACTAGGAAATCCAGGATCATTAATCGGAAATGACCAAATTTACAACGTTATTGTCACAGCACACGCTTTTATTATAATTTTCTTCATAGTTATACCAATCATAATTGGAGGATTCGGAAATTGATTAGTCCCCCTAATACTAGGAGCCCCTGATATAGCATTTCCACGAATAAATAACATAAGATTCTGATTTCTTCCACCATCATTATCTCTACTATTAATAAGAAGAATTGTAGAAAATGGAGCAGGAACAGGCTGAACAGTCTACCCTCCTCTATCAGCAAACATCGCCCATAGTGGATCCTCAGTTGATCTTGCCATTTTCAGCCTACACTTAGCAGGAATCTCATCAATTTTAGGAGCAGTGAATTTCATTTCCACTGTTATCAACATACGAACAACAGGAATTACCTTCGACCGAATACCATTATTCGTATGAGCTGTAGCTATCACAGCTCTTCTATTATTATTATCTCTACCAGTACTAGCTGGGGCAATCACAATATTACTAACTGACCGGAATCTAAACACATCATTTTTTGACCCTGCAGGAGGGGGAGACCCAATCCTATACCAACACCTATTC
>2540_Anostrius_castaneus_Jinbu_GW
AACCTTATACTTCCTTTTTGGAGCATGGTCAGGAATATTAGGTACATCCTTAAGACTCCTTATTCGAGCTGAATTAGGAAATCCTGGATCTCTAATTGGTAATGACCAAATCTACAACGTAGTTGTTACAGCCCACGCTTTTATTATAATTTTTTTTATAGTAATACCAATCATAATTGGTGGTTTCGGAAATTGATTAGTTCCCCTTATACTTGGAGCCCCTGATATAGCATTCCCACGAATGAATAATATAAGATTTTGATTCTTACCTCCATCATTATCCCTTCTTCTAATAAGAAGAATTGTTGAAAATGGTGCAGGAACAGGCTGAACAGTTTACCCCCCACTTTCAGCAAATATTGCCCATAGAGGTTCTTCAGTTGATTTAGCAATTTTTAGTTTACACTTGGCTGGGATTTCTTCAATTCTTGGAGCCGTAAATTTTATTACTACTGTAATTAATATACGAACAACTGGAATCACATTTGATCGAATACCATTATTCGTTTGAGCTGTAGCAATCACAGCCCTTCTTCTTTTATTATCTCTTCCAGTTTTAGCTGGAGCTATTACAATATTATTAACTGATCGAAATTTAAATACATCCTTTTTTGATCCCGCAGGAGGAGGTGACCCAATTCTTTATCAACATCTATTC
>2147_Anostrius_daimio_Hokkaido_Japan
TACCTTATATTTCCTCTTTGGAGCATGGTCAGGAATATTAGGAACATCCTTAAGACTCCTTATTCGAGCTGAATTAGGAAATCCAGGATCCCTTATTGGTAATGACCAAATCTATAACGTAGTTGTTACAGCCCACGCTTTCATTATAATTTTCTTTATAGTAATACCAATCATAATTGGAGGTTTCGGAAATTGATTAGTCCCTCTGATACTTGGAGCCCCTGATATAGCATTCCCACGTATAAACAATATAAGATTCTGATTCCTGCCCCCATCCTTATCTCTTCTTCTAATAAGAAGAATTGTTGAAAACGGTGCAGGAACAGGCTGAACAGTTTATCCCCCACTTTCAGCTAATATTGCTCATAGAGGATCATCAGTTGATCTAGCAATTTTCAGTCTTCACCTAGCTGGGATTTCTTCAATTCTAGGGGCTGTAAACTTTATTACTACTGTAATTAATATACGAACAACTGGAATTACATTTGATCGAATACCATTATTTGTATGAGCCGTAGCAATTACAGCACTCCTCCTTTTATTATCCCTTCCAGTTTTAGCTGGTGCTATCACAATATTATTAACTGATCGAAATTTAAATACATCATTTTTTGACCCTGCAGGAGGAGGTGATCCAATTCTTTATCAACATCTATTT
>2154_Anostrius_daimio_Hokkaido_Japan
TACCTTATATTTCCTCTTTGGAGCATGGTCAGGAATATTAGGAACATCCTTAAGACTCCTTATTCGAGCTGAATTAGGAAATCCAGGATCCCTTATTGGTAATGACCAAATCTATAACGTAGTTGTTACAGCCCACGCTTTCATTATAATTTTCTTTATAGTAATACCAATCATAATTGGAGGTTTCGGAAATTGATTAGTCCCTCTGATACTTGGAGCCCCTGATATAGCATTCCCACGTATAAACAATATAAGATTCTGATTCCTGCCCCCATCCTTATCTCTTCTTCTAATAAGAAGAATTGTTGAAAACGGTGCAGGAACAGGCTGAACAGTTTATCCCCCACTTTCAGCTAATATTGCTCATAGAGGATCATCAGTTGATCTAGCAATTTTCAGTCTTCACCTAGCTGGGATTTCTTCAATTCTAGGGGCTGTAAACTTTATTACTACTGTAATTAATATACGAACAACTGGAATTACATTTGATCGAATACCATTATTTGTATGAGCCGTAGCAATTACAGCACTCCTCCTTTTATTATCCCTTCCAGTTTTAGCTGGTGCTATCACAATATTATTAACTGATCGAAATTTAAATACATCATTTTTTGACCCTGCAGGAGGAGGTGATCCAATTCTTTATCAACATCTATTT
>802_Anostrius_turkestanicus_Uzbekistan
TACCTTATATTTCCTTTTTGGAGCATGATCAGGAATATTAGGAACATCCTTGAGACTCCTTATTCGAGCTGAATTAGGAAACCCGGGATCTCTAATTGGTAATGATCAAATCTATAACGTAGTGGTTACAGCCCATGCTTTCATTATAATTTTTTTTATAGTAATACCAATCATAATTGGTGGTTTCGGAAATTGATTAGTTCCCCTAATACTAGGAGCCCCTGATATAGCATTTCCTCGAATAAACAATATAAGATTCTGATTCTTACCTCCATCTTTATCTCTTCTTCTTATAAGAAGAATTGTTGAAAATGGGGCAGGAACAGGTTGAACAGTTTACCCCCCTTTGTCAGCTAATATTGCTCATAGAGGGTCATCAGTTGACCTAGCAATTTTTAGACTACACTTAGCTGGAATTTCTTCAATTCTTGGGGCCGTAAATTTTATTACTACCGTAATTAATATACGAACAACTGGAGTTACATTTGACCGAATACCCTTATTCGTTTGAGCTGTAGCTATCACAGCCCTTCTTCTTTTATTATCTCTACCAGTTTTAGCTGGAGCTATCACAATATTATTAACTGATCGAAATTTAAATACATCCTTTTTTGACCCTGCGGGGGGAGGTGACCCAATCCTTTACCAACACCTATTC
>2824_Pseudanostrius_ecarinatus_Mt_Seolak_GW
AACCTTATACTTCCTATTTGGAGCATGAGCAGGAATGCTAGGAACCTCCTTAAGCCTACTAATTCGAGCAGAATTAGGAAACCCTGGATCTTTAATCGGAAACGATCAAATTTACAATGTAATCGTCACAGCCCATGCTTTCATTATAATTTTCTTTATAGTTATACCAATTATAATTGGAGGATTTGGAAATTGACTTATTCCCCTAATACTAGGAGCCCCTGATATAGCATTTCCCCGAATAAACAATATAAGATTCTGATTCCTACCCCCTTCATTATCCCTCCTCTTAATAAGAAGAATTGTTGAAAATGGGGCTGGAACAGGATGAACAGTGTATCCCCCACTTTCAGCAAATATTGCCCACAGTGGCTCTTCAGTAGATCTAGCAATTTTCAGCCTCCATTTAGCTGGAATTTCCTCAATTCTAGGAGCAGTAAATTTTATCTCCACCGTAATTAATATACGAACAACTGGAATTACTTTTGATCGAATACCCCTATTCGTTTGAGCAGTAGTTATTACAGCACTCCTCCTATTATTATCTCTCCCAGTATTAGCAGGAGCAATTACAATACTATTAACAGATCGAAATTTGAATACATCCTTCTTTGACCCCGCAGGAGGAGGAGACCCAATTCTATACCAACATTTATTT
>3407_Pseudanostirus_ecarinatus_Bonghwa_GB
AACCTTATACTTCCTATTTGGAGCATGAGCAGGAATGCTAGGAACCTCCTTAAGCCTACTAATTCGAGCAGAATTAGGAAACCCTGGATCTTTAATCGGAAACGATCAAATTTACAATGTAATCGTCACAGCCCATGCTTTTATCATAATTTTCTTTATAGTTATACCAATTATAATTGGAGGATTTGGAAATTGACTTATTCCCCTAATACTAGGAGCCCCTGATATGGCATTTCCCCGAATAAACAATATAAGATTCTGATTCCTACCCCCTTCATTATCCCTCCTCTTAATAAGAAGAATTGTTGAAAATGGAGCTGGAACAGGATGAACAGTGTATCCCCCACTTTCAGCAAATATTGCCCACAGTGGTTCTTCAGTAGACCTAGCAATTTTCAGCCTCCATTTAGCTGGAATTTCCTCAATTCTAGGAGCAGTAAATTTTATCTCCACCGTAATTAATATACGAACAACTGGAATTACTTTTGATCGAATACCCCTATTCGTTTGAGCAGTAGTTATTACAGCACTCCTCCTATTATTATCTCTCCCAGTATTAGCAGGAGCAATTACAATACTATTAACAGATCGAAATTTGAATACATCCTTCTTTGACCCCGCAGGAGGAGGAGACCCAATTCTATACCAACATTTATTT
>3413_Pseudanostirus_ecarinatus_Bonghwa_GB
---CTTATACTTCCTATTTGGAGCATGAGCAGGAATGCTAGGAACCTCCTTAAGCCTACTAATTCGAGCAGAATTAGGAAACCCTGGATCTTTAATCGGAAACGATCAAATTTACAATGTAATCGTCACAGCCCATGCTTTTATCATAATTTTCTTTATAGTTATACCAATTATAATTGGAGGATTTGGAAATTGACTTATTCCCCTAATACTAGGAGCCCCTGATATGGCATTTCCCCGAATAAACAATATAAGATTCTGATTCCTACCCCCTTCATTATCCCTCCTCTTAATAAGAAGAATTGTTGAAAATGGAGCTGGAACAGGATGAACAGTGTATCCCCCACTTTCAGCAAATATTGCCCACAGTGGTTCTTCAGTAGACCTAGCAATTTTCAGCCTCCATTTAGCTGGAATTTCCTCAATTCTAGGAGCAGTAAATTTTATCTCCACCGTAATTAATATACGAACAACTGGAATTACTTTTGATCGAATACCCCTATTCGTTTGAGCAGTAGTTATTACAGCACTCCTCCTATTATTATCTCTCCCAGTATTAGCAGGAGCAATTACAATACTATTAACAGATCGAAATTTGAATACATCCTTCTTTGACCCCGCAGGAGGAGGAGACCCAATTCTATACCAACATTTATTT
>3048_Calamboganus_abscondidus_Mt_Odae_GW
AACCTTATACTTCCTATTCGGAGCATGAGCAGGAATATTAGGAACTTCCTTAAGACTGCTAATTCGAGCTGAATTAGGAAACCCCGGATCCTTAATTGGAAATGACCAAATCTACAACGTAATCGTAACAGCTCACGCCTTTATCATAATTTTCTTCATAGTAATACCAATTATAATTGGAGGATTCGGAAATTGATTAATTCCCCTAATGCTAGGAGCCCCAGACATAGCATTTCCACGAATGAATAACATAAGATTTTGATTCTTACCCCCTTCTCTATCCCTTCTCCTAATAAGAAGAATTGTTGAAAATGGTGCAGGAACAGGATGAACAGTATACCCTCCACTCTCAGCAAATATTGCCCATAGAGGTTCATCAGTTGATCTCGCAATTTTTAGTCTCCACCTAGCTGGAATCTCTTCTATCTTAGGAGCAGTAAATTTTATTTCAACCGTAATTAACATACGAACAACCGGAATTACTTTTGACCGAATACCCCTATTCGTTTGAGCTGTAGTAATCACAGCACTTCTCCTATTGTTATCTTTACCTGTTTTAGCAGGAGCAATTACAATATTATTAACTGATCGAAATCTAAATACATCCTTTTTTGACCCTGCAGGAGGAGGAGACCCAATTCTTTATCAACACTTGTTC
>3047_Calambus_sp_1_Mt_Odae_GW
TACCTTATATTTCCTGTTTGGAGCATGAGCAGGTATGCTAGGAACATCCTTAAGCCTTCTTATTCGAGCTGAACTAGGTAACCCCGGCTCCCTAATTGGAAATGACCAAATCTATAACGTAATTGTCACAGCACACGCCTTTATCATAATTTTCTTCATAGTAATACCAATTATAATTGGAGGATTCGGAAATTGATTAATTCCGCTAATACTTGGAGCCCCTGACATAGCATTCCCACGAATAAATAATATAAGATTCTGATTTCTACCTCCATCATTATCTCTCCTACTAATAAGAAGAATTGTTGAAAACGGAGCAGGAACAGGATGAACAGTATACCCACCACTTTCAGCAAATATTGCCCACAGAGGATCATCAGTTGACCTGGCAATTTTTAGTTTACATCTAGCAGGTATCTCCTCCATTCTAGGAGCAGTAAATTTTATTTCAACAGTAATCAATATACGAACAACTGGAATTACCTTTGACCGAATACCCCTATTCGTTTGAGCAGTAGTAATTACAGCACTTCTTCTATTATTGTCACTACCAGTACTAGCAGGAGCAATCACGATACTTCTAACTGACCGAAACCTAAATACATCCTTTTTTGACCCCGCAGGAGGGGGAGACCCAATTCTTTACCAACACCTATTC
>3402_Calambus_sp_1_Bonghwa_GB
TACCTTATATTTCCTGTTTGGAGCATGAGCAGGTATACTAGGAACATCCTTAAGCCTTCTTATTCGAGCTGAACTGGGTAACCCCGGCTCCCTAATTGGAAATGACCAAATCTATAACGTAATTGTCACAGCACACGCCTTTATCATAATTTTCTTCATAGTAATACCAATTATAATTGGAGGATTCGGAAATTGATTAATTCCACTAATACTTGGAGCCCCTGACATAGCATTCCCACGAATAAATAACATAAGATTCTGATTTCTACCTCCATCATTATCTCTCCTACTAATAAGAAGAATTGTTGAAAACGGAGCAGGAACAGGATGAACAGTATACCCACCACTTTCAGCAAATATTGCCCACAGAGGATCATCAGTTGACCTGGCAATTTTTAGTTTACATCTAGCAGGTATCTCCTCCATTCTAGGAGCAGTAAATTTTATTTCAACAGTAATCAATATACGAACAACTGGAATTACCTTTGACCGAATACCCCTATTCGTTTGAGCAGTAGTAATTACAGCACTTCTTCTATTATTGTCACTACCAGTACTAGCAGGAGCAATCACGATACTTCTAACTGACCGAAACCTAAATACATCCTTTTTTGACCCCGCAGGAGGGGGAGACCCAATTCTTTACCAACACCTATTC
>2488_Calambus_bipustulatus_Mt_Naejang_JN
AACCCTATATTTCCTATTTGGAGCATGAGCAGGAATGCTAGGAACTTCATTAAGCCTTCTAATTCGAGCTGAACTAGGAAACCCTGGCTCTTTAATTGGAAATGATCAAATCTATAACGTAATTGTTACAGCACATGCCTTTATTATAATTTTCTTTATAGTAATACCAATTATAATTGGAGGATTCGGAAACTGATTAATTCCCTTAATACTTGGTGCTCCCGATATGGCATTCCCACGAATAAATAATATAAGATTCTGATTTTTACCCCCTTCATTAAGCCTTCTCTTAATAAGAAGAATTGTTGAAAATGGTGCAGGAACAGGATGAACAGTGTACCCCCCACTTTCAGCCAACATTGCCCATAGAGGATCATCAGTTGATCTCGCAATTTTCAGTCTACATTTAGCCGGAATCTCTTCTATTTTAGGAGCAGTAAATTTTATTTCAACTGTTATTAATATACGAACAACTGGAATTACTTTTGATCGAATACCCCTATTCGTCTGAGCAGTAGTAATTACAGCACTACTTCTACTATTATCACTACCAGTATTGGCAGGAGCAATCACTATACTATTAACTGACCGAAACCTAAACACATCCTTCTTTGATCCTGCAGGAGGTGGTGACCCCATTCTTTATCAACATCTATTT
>2489_Calambus_bipustulatus_Mt_Naejang_JN
AACCCTATATTTCCTATTTGGAGCATGAGCAGGAATGCTAGGAACTTCATTAAGCCTTCTAATTCGAGCTGAACTAGGAAACCCTGGCTCTTTAATTGGAAATGATCAAATTTATAACGTAATTGTTACAGCACATGCCTTTATTATAATTTTCTTTATAGTAATACCAATTATAATTGGAGGATTCGGAAACTGATTAATTCCCTTAATACTTGGTGCTCCCGATATGGCATTCCCACGAATAAATAACATAAGATTCTGATTTTTACCCCCTTCATTAAGCCTTCTCTTAATAAGAAGAATTGTTGAAAATGGTGCAGGAACAGGATGAACAGTGTACCCCCCACTTTCAGCCAACATTGCCCATAGAGGGTCATCAGTTGATCTCGCAATTTTCAGTCTTCATTTAGCTGGAATCTCCTCTATTTTAGGAGCAGTAAATTTTATTTCAACTGTTATTAATATACGAACAACTGGAATTACTTTTGATCGAATACCCCTATTCGTCTGAGCAGTAGTAATTACAGCACTACTTCTACTATTATCACTACCAGTATTGGCAGGAGCAATCACTATACTATTAACTGACCGAAACCTAAACACATCATTCTTTGATCCTGCAGGAGGTGGTGACCCTATTCTTTATCAACATTTATTT
>2490_Calambus_bipustulatus_Mt_Naejang_JN
AACCCTATATTTCCTATTTGGAGCATGAGCAGGAATGCTAGGAACTTCATTAAGCCTTCTAATTCGAGCTGAACTAGGAAACCCTGGCTCTTTAATTGGAAATGATCAAATTTATAACGTAATTGTTACAGCACATGCCTTTATTATAATTTTCTTTATAGTAATACCAATTATAATTGGAGGATTCGGAAACTGATTAATTCCCTTAATACTTGGTGCTCCCGATATGGCATTCCCACGAATAAATAACATAAGATTCTGATTTTTACCCCCTTCATTAAGCCTTCTCTTAATAAGAAGAATTGTTGAAAATGGTGCAGGAACAGGATGAACAGTGTACCCCCCACTTTCAGCCAACATTGCCCATAGAGGGTCATCAGTTGATCTCGCAATTTTCAGTCTACATTTAGCTGGAATCTCCTCTATTTTAGGAGCAGTAAATTTTATTTCAACTGTTATTAATATACGAACAACTGGAATTACTTTTGATCGAATACCCCTATTCGTCTGAGCAGTAGTAATTACAGCACTACTTCTACTATTATCACTACCAGTATTGGCAGGAGCAATCACTATACTATTAACTGACCGAAACCTAAACACATCCTTCTTTGATCCTGCAGGAGGTGGTGACCCTATTCTTTATCAACATTTATTT
>3198_Calambus_bipustulatus_Mt_Gyeryong_CN
AACCCTATACTTCCTATTTGGAGCATGAGCAGGAATGCTAGGAACTTCATTAAGCCTTCTAATTCGAGCTGAACTAGGAAACCCTGGCTCTTTAATTGGAAATGATCAAATTTATAACGTAATTGTTACAGCACATGCCTTTATTATAATTTTCTTTATAGTAATACCAATTATAATTGGAGGATTCGGAAACTGATTAATTCCCTTAATACTTGGTGCTCCCGATATGGCATTCCCACGAATAAATAATATAAGATTCTGATTTTTACCCCCTTCATTAAGCCTTCTCTTAATAAGAAGAATTGTTGAAAATGGTGCAGGAACAGGATGAACAGTGTACCCCCCACTTTCAGCCAACATTGCCCATAGAGGGTCATCAGTTGATCTCGCAATTTTCAGTCTACATTTAGCTGGAATCTCTTCTATTTTAGGAGCAGTAAATTTTATTTCAACTGTTATTAATATACGAACAACTGGAATTACTTTTGATCGAATACCCCTATTCGTCTGAGCAGTAGTAATTACAGCACTACTTCTACTATTATCACTACCAGTATTGGCAGGAGCAATCACTATACTATTAACTGACCGAAACCTAAACACATCCTTCTTTGATCCTGCAGGAGGTGGTGACCCCATTCTTTATCAACATTTATTT
>3237_Calambus_bipustulatus_Mt_Gyeryong_CN
AACCCTATACTTCCTATTTGGAGCATGAGCAGGAATGCTAGGAACTTCATTAAGCCTTCTAATTCGAGCTGAACTAGGAAACCCTGGCTCTTTAATTGGAAATGATCAAATTTATAACGTAATTGTTACAGCACATGCCTTTATTATAATTTTCTTTATAGTAATACCAATTATAATTGGAGGATTCGGAAACTGATTAATTCCCTTAATACTTGGTGCTCCCGATATGGCATTCCCACGAATAAATAACATAAGATTCTGATTTTTACCCCCTTCATTAAGCCTTCTCTTAATAAGAAGAATTGTTGAAAATGGTGCAGGAACAGGATGAACAGTGTACCCCCCACTTTCAGCCAACATTGCCCATAGAGGATCATCAGTTGATCTCGCAATTTTCAGTCTACATTTAGCTGGAATCTCTTCTATTTTAGGAGCAGTAAATTTTATTTCAACTGTTATTAATATACGAACAACTGGAATTACTTTTGATCGAATACCCCTATTCGTCTGAGCAGTAGTAATTACAGCACTACTTCTACTATTATCACTACCAGTATTGGCAGGAGCAATCACTATACTATTAACTGACCGAAACCTAAACACATCCTTCTTTGATCCTGCAGGAGGTGGTGACCCCATTCTTTATCAACATTTATTT
>3387_Calambus_bipustulatus_Bonghwa_GB
AACCCTATACTTCCTATTTGGAGCATGAGCAGGAATGCTAGGAACTTCATTAAGCCTTCTAATTCGAGCTGAACTAGGAAACCCTGGCTCTTTAATTGGAAATGATCAAATTTATAACGTAATTGTTACAGCACATGCCTTTATTATAATTTTCTTTATAGTAATACCAATTATAATTGGAGGATTCGGAAACTGATTAATTCCCTTAATACTTGGTGCTCCCGATATGGCATTCCCACGAATAAATAATATAAGATTCTGATTTTTACCCCCTTCATTAAGCCTTCTCTTAATAAGAAGAATTGTTGAAAATGGTGCAGGAACAGGATGAACAGTGTACCCCCCACTTTCAGCCAACATTGCCCATAGAGGGTCATCAGTTGATCTCGCAATTTTCAGTCTACATTTAGCTGGAATCTCTTCTATTCTAGGAGCAGTAAATTTTATTTCAACTGTTATTAATATACGAACAACTGGAATTACTTTTGATCGAATACCCCTATTCGTCTGAGCAGTAGTAATTACAGCACTACTTCTACTATTATCACTACCAGTATTGGCAGGAGCAATCACTATACTATTAACTGACCGAAACCTAAACACATCCTTCTTTGATCCTGCAGGAGGTGGTGACCCCATTCTTTATCAACATTTATTT
>3388_Calambs_bipustulatus_Bonghwa_GB
--------------TATTTGGAGCATGAGCAGGAATGCTAGGAACTTCATTAAGCCTTCTAATTCGAGCTGAACTAGGAAACCCTGGCTCTTTAATTGGAAATGATCAAATTTATAACGTAATTGTTACAGCACATGCCTTTATTATAATTTTCTTTATAGTAATACCAATTATAATTGGAGGATTCGGAAACTGATTAATTCCCTTAATACTTGGTGCTCCCGATATGGCATTCCCACGAATAAATAATATAAGATTCTGATTTTTACCCCCTTCATTAAGCCTTCTCTTAATAAGAAGAATTGTTGAAAATGGTGCAGGAACAGGATGAACAGTGTACCCCCCACTTTCAGCCAACATTGCCCATAGAGGATCATCAGTTGATCTCGCAATTTTCAGTCTACATTTAGCTGGAATCTCTTCTATTTTAGGAGCAGTAAATTTTATTTCAACTGTTATTAATATACGAACAACTGGAATTACTTTTGATCGAATACCCCTATTCGTCTGAGCAGTAGTAATTACAGCACTACTTCTACTATTATCACTACCAGTATTGGCAGGAGCAATCACTATACTATTAACTGACCGAAACCTAAACACATCCTTCTTTGATCCTGCAGGAGGTGGTGACCCCATTCTTTATCAACATTTATTT
>3411_Calambus_bipustulatus_Bonghwa_GB
AACCCTATACTTCCTATTTGGAGCATGAGCAGGAATGCTAGGAACTTCATTAAGCCTTCTAATTCGAGCTGAACTAGGAAACCCTGGCTCTTTAATTGGAAATGATCAAATTTATAACGTAATTGTTACAGCACATGCCTTTATTATAATTTTCTTTATAGTAATACCAATTATAATTGGAGGATTCGGAAACTGATTAATTCCCTTAATACTTGGTGCTCCCGATATGGCATTCCCACGAATAAATAACATAAGATTCTGATTTTTACCCCCTTCATTAAGCCTTCTCTTAATAAGAAGAATTGTTGAAAATGGTGCAGGAACAGGATGAACAGTGTACCCCCCACTTTCAGCCAACATTGCCCATAGAGGATCATCAGTTGATCTCGCAATTTTCAGTCTACATTTAGCTGGAATCTCTTCTATTTTAGGAGCAGTAAATTTTATTTCAACTGTTATTAATATACGAACAACTGGAATTACTTTTGATCGAATACCCCTATTCGTCTGAGCAGTAGTAATTACAGCACTACTTCTACTATTATCACTACCAGTATTGGCAGGAGCAATCACTATACTATTAACTGACCGAAACCTAAACACATCCTTCTTTGATCCTGCAGGAGGTGGTGACCCCATTCTTTATCAACATTTATTT
>3412_Calambus_bipustulatus_Bonghwa_GB
AACCCTATACTTCCTATTTGGAGCATGAGCAGGAATGCTAGGAACTTCATTAAGCCTTCTAATTCGAGCTGAACTAGGAAACCCTGGCTCTTTAATTGGAAATGATCAAATTTATAACGTAATTGTTACAGCACATGCCTTTATTATAATTTTCTTTATAGTAATACCAATTATAATTGGAGGATTCGGAAACTGATTAATTCCCTTAATACTTGGTGCTCCCGATATGGCATTCCCACGAATAAATAATATAAGATTCTGATTTTTACCCCCTTCATTAAGCCTTCTCTTAATAAGAAGAATTGTTGAAAATGGTGCAGGAACAGGATGAACAGTGTACCCCCCACTTTCAGCCAACATTGCCCATAGAGGGTCATCAGTTGATCTCGCAATTTTCAGTCTACATTTAGCTGGAATCTCTTCTATTCTAGGAGCAGTAAATTTTATTTCAACTGTTATTAATATACGAACAACTGGAATTACTTTTGATCGAATACCCCTATTCGTCTGAGCAGTAGTAATTACAGCACTACTTCTACTATTATCACTACCAGTATTGGCAGGAGCAATCACTATACTATTAACTGACCGAAACCTAAACACATCCTTCTTTGATCCTGCAGGAGGTGGTGACCCCATTCTTTATCAACATTTATTT
>2589_Hypoganomorphus_leavicollis_Sakhalin_Russia
---TCTATACTTCCTATTCGGAGCATGGGCCGGAATACTAGGAACATCGCTTAGCCTACTAATCCGAGCTGAATTAGGAAATCCTGGTTCATTAATCGGAAACGACCAAATCTACAACGTTATTGTAACAGCACACGCTTTCATTATAATTTTCTTTATAGTTATGCCAATTATAATCGGAGGGTTCGGAAATTGACTAGTACCTCTAATACTGGGAGCCCCTGATATAGCGTTCCCCCGAATAAACAACATAAGATTCTGGTTTCTTCCCCCATCTCTTTCACTCCTTTTAATGAGAAGAATTGTAGAAAATGGTGCAGGAACTGGTTGAACTGTATACCCTCCTCTATCAGCAAATATCGCCCACAGAGGATCATCTGTAGACCTAGCCATTTTCAGTTTACATTTAGCAGGAATCTCATCAATTCTTGGTGCAGTAAATTTTATTTCTACAGTAATTAACATACGATCAACTGGAATTACCTTCGACCGAATACCTCTTTTTGTATGAGCCGTAGCCATCACAGCCCTTCTACTCCTTTTATCTCTGCCTGTTTTAGCAGGTGCAATTACAATACTACTAACCGATCGAAATCTTAATACTTCCTTCTTTGACCCCGCAGGAGGAGGTGACCCAATCTTATACCAACACCTATTC
