# Supplementary material for: Reassessment of Species Diversity of the Subfamily Denticollinae (Coleoptera: Elateridae) through DNA Barcoding
Source: PLoS One. 2016 Feb 5;11(2):e0148602. doi: 10.1371/journal.pone.0148602 (PMC4744053; doi:10.1371/journal.pone.0148602)
Supplement: S1 Table — (XLSX) [file pone.0148602.s003.xlsx]

## Sheet: Table S1
Table S1. List of 421 COI sequences of 84 species belonging to 36 genera and three tribes within the subfamily Denticollinae.
No. of indis.	Classification		Voucher no.	Locality	Date collected	Preserved conditions	GenBank Accession No.	References
	Tribe	Genus and species
1	Hypnoidini	Berninelsonius hyperboreus (Gyllenhal, 1827)	3485	Russia: S. Siberia, Tuva reg., riv. Khorumnug-Taiga, Mt. Khad-ek (E: 96°36', N: 51°17')	15. V. 2010	Dried	KJ432906	This study
2	Hypnoidini	Berninelsonius hyperboreus (Gyllenhal, 1827)	3486	Russia: S. Siberia, Tuva reg., riv. Khorumnug-Taiga, Mt. Khad-ek (E: 96°36', N: 51°18')	15. V. 2010	Dried	KJ432907	This study
3	Hypnoidini	Berninelsonius hyperboreus (Gyllenhal, 1827)	3487	Russia: S. Siberia, Tuva reg., riv. Khorumnug-Taiga, Mt. Khad-ek (E: 96°36', N: 51°19')	15. V. 2010	Dried	KF317267	Han et al. (2013, unpublished)
4	Hypnoidini	Hypnoidus narymensis (Dolin and Cate, 1998)	3489	Kirgistan: Terskei Ala Too, Mt. Rng. Barskoon Valley, 2600 m (E: 77°38', N: 42°06')	8. VII. 2009	Dried	KF317268	Han et al. (2013, unpublished)
5	Hypnoidini	Hypnoidus narymensis (Dolin and Cate, 1998)	3490	Kirgistan: Terskei Ala Too, Mt. Rng. Barskoon Valley, 2600 m (E: 77°38', N: 42°06')	8. VII. 2009	Dried	KJ432908	This study
6	Hypnoidini	Homotechnes motchulskyi (Fleutiaux, 1902)	3202	Korea: GW, Yeongwol, Eorayeon (E: 128°31', N: 37°14')	8. VI. 2008	Alcohol	KJ432909	This study
7	Denticollini	Limonius minutus (Linnaeus, 1758)	793	Germany: Oberpfalz otterberg Trockunhang (E: 12°02', N: 49°33')	? V. 1990	Dried	KJ432910	This study
8	Denticollini	Limonius scutellaris (Dolin, 2003)	867	Korea: GW, Hongcheon, Bukbang, Dojagok (E: 127°51', N: 37°42')	30. V. 2009	Frozen	KJ432911	[45]
9	Denticollini	Limonius scutellaris (Dolin, 2003)	2362	Korea: GG, Incheon, Ongjin, Is. Soya-do (E: 126°10', N: 37°13')	6. VI. 2009	Alcohol	KJ432912	[45]
10	Denticollini	Limonius scutellaris (Dolin, 2003)	2366	Korea: GG, Incheon, Ongjin, Is. Soya-do (E: 126°10', N: 37°13')	6. VI. 2009	Alcohol	KJ432913	[45]
11	Denticollini	Limonius scutellaris (Dolin, 2003)	2617	Korea: CN, Gongju, Temple Gapsa in Mt. Geryeong-san (E: 127°11', N: 36°21')	29. V. 2010	Frozen	KF317241	Han et al. (2013, unpublished)
12	Denticollini	Limonius scutellaris (Dolin, 2003)	2638	Korea: GB, Bonghwa, Chunghyang, Seobeok (E: 128°54', N: 36°56')	29. V. 2010	Frozen	KJ432914	[45]
13	Denticollini	Limonius scutellaris (Dolin, 2003)	2778	Korea: CB, Jaecheon, Hansu, Songge (E: 128°04', N: 36°53')	18. V. 2010	Alcohol	KJ432915	[45]
14	Denticollini	Limonius scutellaris (Dolin, 2003)	2398	Russia: Primorsky Krai, Lazo district, ROC. Lazo-raychentr (E: 136°35', N: 47°43')	26-29. V. 2007	Dried	KJ432916	[45]
15	Denticollini	Limonius scutellaris (Dolin, 2003)	2564	Russia: Primorsky Krai, Khasansky District Barabash (E: 130°55', N: 42°46')	22. VI. 2008	Alcohol	KJ432917	[45]
16	Denticollini	Cidonotus koltzei (Reitter, 1895)	2606	Russia: Sahkalin, Korsakov, Prigorodnove (E: 142°48', N: 46°38')	18. VII. 2008	Alcohol	KJ432918	[45]
17	Denticollini	Cidonotus koltzei (Reitter, 1895)	2607	Russia: Sahkalin, Korsakov, Prigorodnove (E: 142°48', N: 46°38')	18. VII. 2008	Alcohol	KJ432919	[45]
18	Denticollini	Pheletes quercus (Olivier, 1790)	792	Austria: Niedrosterreich Wachau Umgebung Maria Laach (E: 15°26', N: 47°02')	? VI. 1992	Dried	KJ432920	[45]
19	Denticollini	Limoniscus kraatzi kraatzi (Candèze, 1879)	395	Korea: GN, Hadong, Hwagye, Beamwang, Temple Chilbulsa (E: 127°36', N: 35°16')	17. V. 2008	Alcohol	KJ432921	This study
20	Denticollini	Limoniscus kraatzi kraatzi (Candèze, 1879)	823	Korea: GG, Uiwang, Hakui, Mt. Cheonggye (E: 127°02', N: 37°24')	22. V. 2009	Frozen	KF317217	Han et al. (2013, unpublished)
21	Denticollini	Limoniscus kraatzi kraatzi (Candèze, 1879)	1045	Korea: GW, Pyeongchang, Yongpyeong, Nodong, Mt. Gyebang (E: 128°27', N: 37°43')	13. VI. 2009	Alcohol	KJ432922	This study
22	Denticollini	Limoniscus kraatzi kraatzi (Candèze, 1879)	1150	Korea: JJ, Seongpanak (E: 126°37', N: 33°23')	5. VI. 2001	Dried	KJ432923	This study
23	Denticollini	Limoniscus kraatzi kraatzi (Candèze, 1879)	1152	Korea: GG, Suwon, Mt. Gwangyo (E: 127°01', N: 37°19')	18. V. 2001	Dried	KJ432924	This study
24	Denticollini	Limoniscus kraatzi kraatzi (Candèze, 1879)	1154	Korea: GG, Gapyeong, Buk, Baekdun, Mt. Myeongji (E: 127°25', N: 37°25')	28. V. 2001	Dried	KJ432925	This study
25	Denticollini	Limoniscus kraatzi kraatzi (Candèze, 1879)	1155	Korea: GG, Suwon, Homaesil, Mt. Chilbo (E: 126°27', N: 37°15')	30. IV. 2004	Dried	KJ432926	This study
26	Denticollini	Limoniscus kraatzi kraatzi (Candèze, 1879)	1159	Korea: JB, Muju, Mt. Dukyou (E: 127°44', N: 35°51')	19. VII. 2007	Dried	KJ432927	This study
27	Denticollini	Limoniscus kraatzi kraatzi (Candèze, 1879)	1160	Korea: JB, Muju, Mt. Dukyou (E: 127°44', N: 35°51')	19. VII. 2007	Dried	KJ432928	This study
28	Denticollini	Limoniscus kraatzi kraatzi (Candèze, 1879)	2553	Korea: GN, Jinju (E: 128°06', N: 35°10')	14. V. 2010	Alcohol	KJ432929	This study
29	Denticollini	Limoniscus kraatzi kraatzi (Candèze, 1879)	2786	Korea: GW, Jeongsun, Gohan, Mt. Hambaek (E: 128°55', N: 37°09')	21. V. 2010	Alcohol	KJ432930	This study
30	Denticollini	Limoniscus kraatzi kraatzi (Candèze, 1879)	2901	Korea: GG, Seoul, Onerobong, Mt. Bukhan (E: 126°59', N: 37°39')	8. VI. 2010	Alcohol	KJ432931	This study
31	Denticollini	Limoniscus kraatzi kraatzi (Candèze, 1879)	2394	Russia: Primorsky Krai (E: 135°00', N: 45°03')	26-29. V. 2007	Dried	KJ432932	This study
32	Denticollini	Athous (Haplathous) subfuscus (Müller, 1764)	3517	Russia: NW Russia, St-Petersburg reg, Kirovsk dist. Siniavino v (E: 30°59', N: 59°52')	1. VII. 2008	Dried	KF317270	Han et al. (2013, unpublished)
33	Denticollini	Athous (Orthathous) bicolor (Goeze, 1777)	–	Austria: Tyrol	2. V. 2003	–	HM542059	[24]
34	Denticollini	Athous (s. str.) haemorrhoidalis (Fabricius, 1801)	–	France: Semons	–	–	GU434037	[23]
35	Denticollini	Athous (s. str.) haemorrhoidalis (Fabricius, 1801)	–	Poland: Lesser Polish Upland, around Grabowiec Nature Reserve	–	–	JF781274	[25]
36	Denticollini	Athous (s. str.) haemorrhoidalis (Fabricius, 1801)	–	Poland: Lesser Polish Upland, around Grabowiec Nature Reserve	–	–	JF781273	[25]
37	Denticollini	Athous (s. str.) puncticollis (Kiesenwetter, 1858)	–	France: Pourvieux	–	–	GU434041	[23]
38	Denticollini	Athous (s. str.) puncticollis (Kiesenwetter, 1858)	–	France: Sainte	–	–	GU434038	[23]
39	Denticollini	Athous (s. str.) puncticollis (Kiesenwetter, 1858)	–	France: Limans	–	–	GU434039	[23]
40	Denticollini	Athous (s. str.) puncticollis (Kiesenwetter, 1858)	–	France: Limans	–	–	GU434042	[23]
41	Denticollini	Athous (s. str.) vittatus (Gmelin, 1790)	–	France: Fericy	–	–	GU434040	[23, 25]
42	Denticollini	Athous (s. str.) vittatus (Gmelin, 1790)	–	France: Ige	–	–	GU434036	[23, 25]
43	Denticollini	Athous (s. str.) vittatus (Gmelin, 1790)	–	Poland: Lesser Polish Upland, around Grabowiec Nature Reserve	–	–	JF781275	[25]
44	Denticollini	Athous (s. str.) vittatus (Gmelin, 1790)	–	France: Fericy	–	–	GU434043	[23, 25]
45	Denticollini	Hemicrepidius (s. str.) coreanus Kishii, 2002	229	Korea: JJ, Jeju, Yeondong, Botaincal garden (E: 126°29', N: 33°29')	11. VII.2008	Alcohol	KJ432933	This study
46	Denticollini	H. (s. str.) coreanus Kishii, 2002	230	Korea: JJ, Jeju, Yeondong, Botaincal garden (E: 126°29', N: 33°29')	11. VII.2008	Alcohol	KJ432934	This study
47	Denticollini	H. (s. str.) coreanus Kishii, 2002	231	Korea: JJ, Jeju, Yeondong, Botaincal garden (E: 126°29', N: 33°29')	11. VII.2008	Alcohol	KJ432935	This study
48	Denticollini	H. (s. str.) coreanus Kishii, 2002	232	Korea: JJ, Jeju, Yeondong, Botaincal garden (E: 126°29', N: 33°29')	11. VII.2008	Alcohol	KJ432936	This study
49	Denticollini	H. (s. str.) coreanus Kishii, 2002	233	Korea: JJ, Jeju, Yeondong, Botaincal garden (E: 126°29', N: 33°29')	11. VII.2008	Alcohol	KJ432937	This study
50	Denticollini	H. (s. str.) coreanus Kishii, 2002	235	Korea: JJ, Jeju, Yeondong, Botaincal garden (E: 126°29', N: 33°29')	11. VII.2008	Alcohol	KJ432938	This study
51	Denticollini	H. (s. str.) coreanus Kishii, 2002	236	Korea: JJ, Jeju, Yeondong, Botaincal garden (E: 126°29', N: 33°29')	11. VII.2008	Alcohol	KJ432939	This study
52	Denticollini	H. (s. str.) coreanus Kishii, 2002	238	Korea: JJ, Jeju, Yeondong, Botaincal garden (E: 126°29', N: 33°29')	11. VII.2008	Alcohol	KJ432940	This study
53	Denticollini	H. (s. str.) coreanus Kishii, 2002	240	Korea: JJ, Jeju, Yeondong, Botaincal garden (E: 126°29', N: 33°29')	11. VII.2008	Alcohol	KJ432941	This study
54	Denticollini	H. (s. str.) coreanus Kishii, 2002	244	Korea: JJ, Jeju, Ara1dong, Temple Gwaneumsa (E: 126°32', N: 33°23')	11. VII.2008	Alcohol	KJ432942	This study
55	Denticollini	H. (s. str.) coreanus Kishii, 2002	246	Korea: JJ, Jeju, Ara1dong, Temple Gwaneumsa (E: 126°32', N: 33°23')	11. VII.2008	Alcohol	KJ432943	This study
56	Denticollini	H. (s. str.) coreanus Kishii, 2002	248	Korea: JJ, Jeju, Ara1dong, Temple Gwaneumsa (E: 126°32', N: 33°23')	11. VII.2008	Alcohol	KJ432944	This study
57	Denticollini	H. (s. str.) coreanus Kishii, 2002	1046	Korea: JJ, Seoguipo, Namwon, Hannam, Sareo forest road (E: 126°37', N: 33°17')	22. VII. 2009	Alcohol	KJ432945	This study
58	Denticollini	H. (s. str.) coreanus Kishii, 2002	1047	Korea: JJ, Seoguipo, Namwon, Hannam, Sareo forest road (E: 126°37', N: 33°17')	22. VII. 2009	Alcohol	KJ432946	This study
59	Denticollini	H. (s. str.) coreanus Kishii, 2002	1048	Korea: JJ, Seoguipo, Namwon, Hannam, Sareo forest road (E: 126°37', N: 33°17')	22. VII. 2009	Alcohol	KJ432947	This study
60	Denticollini	H. (s. str.) coreanus Kishii, 2002	1056	Korea: JJ, Seoguipo, Hawon, Yeongsil (E: 126°35', N: 33°19')	22. VII. 2009	Alcohol	KJ432948	This study
61	Denticollini	H. (s. str.) coreanus Kishii, 2002	1075	Korea: JJ, Jeju, Yeondong, Jeju cemetery (E: 126°29', N: 33°29')	21. VII. 2009	Alcohol	KJ432949	This study
62	Denticollini	H. (s. str.) coreanus Kishii, 2002	1076	Korea: JJ, Jeju, Yeondong, Jeju cemetery (E: 126°29', N: 33°29')	21. VII. 2009	Alcohol	KJ432950	This study
63	Denticollini	H. (s. str.) coreanus Kishii, 2002	1077	Korea: JJ, Jeju, Yeondong, Jeju cemetery (E: 126°29', N: 33°29')	21. VII. 2009	Alcohol	KJ432951	This study
64	Denticollini	H. (s. str.) coreanus Kishii, 2002	1078	Korea: JJ, Jeju, Yeondong, Jeju cemetery (E: 126°29', N: 33°29')	21. VII. 2009	Alcohol	KJ432952	This study
65	Denticollini	H. (s. str.) coreanus Kishii, 2002	1079	Korea: JJ, Jeju, Yeondong, Jeju cemetery (E: 126°29', N: 33°29')	21. VII. 2009	Alcohol	KJ432953	This study
66	Denticollini	H. (s. str.) coreanus Kishii, 2002	1080	Korea: JJ, Jeju, Yeondong, Jeju cemetery (E: 126°29', N: 33°29')	21. VII. 2009	Alcohol	KJ432954	This study
67	Denticollini	H. (s. str.) coreanus Kishii, 2002	1081	Korea: JJ, Jeju, Yeondong, Jeju cemetery (E: 126°29', N: 33°29')	21. VII. 2009	Alcohol	KJ432955	This study
68	Denticollini	H. (s. str.) coreanus Kishii, 2002	1082	Korea: JJ, Jeju, Yeondong, Jeju cemetery (E: 126°29', N: 33°29')	21. VII. 2009	Alcohol	KJ432956	This study
69	Denticollini	H. (s. str.) coreanus Kishii, 2002	1083	Korea: JJ, Jeju, Yeondong, Jeju cemetery (E: 126°29', N: 33°29')	21. VII. 2009	Alcohol	KJ432957	This study
70	Denticollini	H. (s. str.) coreanus Kishii, 2002	1084	Korea: JJ, Jeju, Yeondong, Jeju cemetery (E: 126°29', N: 33°29')	21. VII. 2009	Alcohol	KJ432958	This study
71	Denticollini	H. (s. str.) coreanus Kishii, 2002	1085	Korea: JJ, Jeju, Yeondong, Jeju cemetery (E: 126°29', N: 33°29')	21. VII. 2009	Alcohol	KJ432959	This study
72	Denticollini	H. (s. str.) coreanus Kishii, 2002	1086	Korea: JJ, Jeju, Yeondong, Jeju cemetery (E: 126°29', N: 33°29')	21. VII. 2009	Alcohol	KJ432960	This study
73	Denticollini	H. (s. str.) coreanus Kishii, 2002	1087	Korea: JJ, Jeju, Yeondong, Jeju cemetery (E: 126°29', N: 33°29')	21. VII. 2009	Alcohol	KJ432961	This study
74	Denticollini	H. (s. str.) coreanus Kishii, 2002	1088	Korea: JJ, Jeju, Yeondong, Jeju cemetery (E: 126°29', N: 33°29')	21. VII. 2009	Alcohol	KJ432962	This study
75	Denticollini	H. (s. str.) coreanus Kishii, 2002	1089	Korea: JJ, Jeju, Yeondong, Jeju cemetery (E: 126°29', N: 33°29')	21. VII. 2009	Alcohol	KJ432963	This study
76	Denticollini	H. (s. str.) coreanus Kishii, 2002	1090	Korea: JJ, Jeju, Yeondong, Jeju cemetery (E: 126°29', N: 33°29')	21. VII. 2009	Alcohol	KJ432964	This study
77	Denticollini	H. (s. str.) coreanus Kishii, 2002	1091	Korea: JJ, Jeju, Yeondong, Jeju cemetery (E: 126°29', N: 33°29')	21. VII. 2009	Alcohol	KJ432965	This study
78	Denticollini	H. (s. str.) coreanus Kishii, 2002	1092	Korea: JJ, Jeju, Yeondong, Jeju cemetery (E: 126°29', N: 33°29')	21. VII. 2009	Alcohol	KJ432966	This study
79	Denticollini	H. (s. str.) coreanus Kishii, 2002	1093	Korea: JJ, Jeju, Yeondong, Jeju cemetery (E: 126°29', N: 33°29')	21. VII. 2009	Alcohol	KJ432967	This study
80	Denticollini	H. (s. str.) coreanus Kishii, 2002	2722	Korea: JJ, Seoguipo, Dosu-orchard (E: 126°37', N: 33°17')	2. VII. 2010	Alcohol	KJ432968	This study
81	Denticollini	H. (s. str.) coreanus Kishii, 2002	2734	Korea: JJ, Jeju, Ara1dong, Temple Gwanumsa (E: 126°32', N: 33°23')	1. VII. 2010	Frozen	KJ432969	This study
82	Denticollini	H. (s. str.) coreanus Kishii, 2002	2735	Korea: JJ, Jeju, Ara1dong, Temple Gwanumsa (E: 126°32', N: 33°23')	1. VII. 2010	Frozen	KJ432970	This study
83	Denticollini	H. (s. str.) coreanus Kishii, 2002	2736	Korea: JJ, Jeju, Ara1dong, Temple Gwanumsa (E: 126°32', N: 33°23')	1. VII. 2010	Frozen	KJ432971	This study
84	Denticollini	H. (s. str.) coreanus Kishii, 2002	2756	Korea: JJ, Seonheul, Dongbaek-dongsan (E: 126°43', N: 33°30')	2. VII. 2010	Frozen	KJ432972	This study
85	Denticollini	H. (s. str.) coreanus Kishii, 2002	2757	Korea: JJ, Seonheul, Dongbaek-dongsan (E: 126°43', N: 33°30')	2. VII. 2010	Frozen	KJ432973	This study
86	Denticollini	H. (s. str.) coreanus Kishii, 2002	2758	Korea: JJ, Seonheul, Dongbaek-dongsan (E: 126°43', N: 33°30')	2. VII. 2010	Frozen	KJ432974	This study
87	Denticollini	H. (s. str.) coreanus Kishii, 2002	2759	Korea: JJ, Seonheul, Dongbaek-dongsan (E: 126°43', N: 33°30')	2. VII. 2010	Frozen	KJ432975	This study
88	Denticollini	H. (s. str.) coreanus Kishii, 2002	2760	Korea: JJ, Seonheul, Dongbaek-dongsan (E: 126°43', N: 33°30')	2. VII. 2010	Frozen	KJ432976	This study
89	Denticollini	H. (s. str.) coreanus Kishii, 2002	2761	Korea: JJ, Seonheul, Dongbaek-dongsan (E: 126°43', N: 33°30')	2. VII. 2010	Frozen	KJ432977	This study
90	Denticollini	H. (s. str.) coreanus Kishii, 2002	2764	Korea: JJ, Seonheul, Dongbaek-dongsan (E: 126°43', N: 33°30')	2. VII. 2010	Frozen	KJ432978	This study
91	Denticollini	H. (s. str.) coreanus Kishii, 2002	2765	Korea: JJ, Seonheul, Dongbaek-dongsan (E: 126°43', N: 33°30')	2. VII. 2010	Frozen	KJ432979	This study
92	Denticollini	H. (s. str.) coreanus Kishii, 2002	2766	Korea: JJ, Seonheul, Dongbaek-dongsan (E: 126°43', N: 33°30')	2. VII. 2010	Frozen	KJ432980	This study
93	Denticollini	H. (s. str.) coreanus Kishii, 2002	2767	Korea: JJ, Seonheul, Dongbaek-dongsan (E: 126°43', N: 33°30')	2. VII. 2010	Alcohol	KJ432981	This study
94	Denticollini	H. (s. str.) coreanus Kishii, 2002	2768	Korea: JJ, Seonheul, Dongbaek-dongsan (E: 126°43', N: 33°30')	2. VII. 2010	Frozen	KJ432982	This study
95	Denticollini	H. (s. str.) coreanus Kishii, 2002	2769	Korea: JJ, Seonheul, Dongbaek-dongsan (E: 126°43', N: 33°30')	2. VII. 2010	Frozen	KJ432983	This study
96	Denticollini	H. (s. str.) coreanus Kishii, 2002	2770	Korea: JJ, Seonheul, Dongbaek-dongsan (E: 126°43', N: 33°30')	2. VII. 2010	Frozen	KJ432984	This study
97	Denticollini	H. (s. str.) coreanus Kishii, 2002	2771	Korea: JJ, Seonheul, Dongbaek-dongsan (E: 126°43', N: 33°30')	2. VII. 2010	Frozen	KJ432985	This study
98	Denticollini	H. (s. str.) coreanus Kishii, 2002	2772	Korea: JJ, Seonheul, Dongbaek-dongsan (E: 126°43', N: 33°30')	2. VII. 2010	Frozen	KJ432986	This study
99	Denticollini	H. (s. str.) coreanus Kishii, 2002	2773	Korea: JJ, Seonheul, Dongbaek-dongsan (E: 126°43', N: 33°30')	2. VII. 2010	Alcohol	KJ432987	This study
100	Denticollini	H. (s. str.) coreanus Kishii, 2002	173	Korea: JN, Is. Chuja-do, Muk-ri (E: 126°19', N: 33°56')	9. VII. 2008	Frozen	KJ432988	This study
101	Denticollini	H. (s. str.) coreanus Kishii, 2002	174	Korea: JN, Is. Chuja-do, Muk-ri (E: 126°19', N: 33°56')	9. VII. 2008	Frozen	KJ432989	This study
102	Denticollini	H. (s. str.) coreanus Kishii, 2002	175	Korea: JN, Is. Chuja-do, Muk-ri (E: 126°19', N: 33°56')	9. VII. 2008	Frozen	KJ432990	This study
103	Denticollini	H. (s. str.) coreanus Kishii, 2002	3429	Korea: JJ, Seoguipo, Dosun (E: 126°37', N: 33°17')	20. VII. 2012	Alcohol	KJ432991	This study
104	Denticollini	H. (s. str.) coreanus Kishii, 2002	3430	Korea: JJ, Seoguipo, Dosun (E: 126°37', N: 33°17')	20. VII. 2012	Alcohol	KJ432992	This study
105	Denticollini	H. (s. str.) sp. 1, candidate new species	3310	Korea: GW, Pyeongchang, Jinbu, Daekwanryeong (E: 128°45', N: 37°41')	12. VII. 2012	Frozen	KJ432993	This study
106	Denticollini	H. (s. str.) hallaensis Kishii, 2002 stat. nov.	1050	Korea: JJ, Seoguipo, Hawon, Yeongsil (E: 126°35', N: 33°19')	22. VII. 2009	Alcohol	KJ432994	This study
107	Denticollini	H. (s. str.) hallaensis Kishii, 2002 stat. nov.	1051	Korea: JJ, Seoguipo, Hawon, Yeongsil (E: 126°35', N: 33°19')	22. VII. 2009	Alcohol	KJ432995	This study
108	Denticollini	H. (s. str.) hallaensis Kishii, 2002 stat. nov.	1052	Korea: JJ, Seoguipo, Hawon, Yeongsil (E: 126°35', N: 33°19')	22. VII. 2009	Alcohol	KJ432996	This study
109	Denticollini	H. (s. str.) hallaensis Kishii, 2002 stat. nov.	1053	Korea: JJ, Seoguipo, Hawon, Yeongsil (E: 126°35', N: 33°19')	22. VII. 2009	Alcohol	KJ432997	This study
110	Denticollini	H. (s. str.) hallaensis Kishii, 2002 stat. nov.	1054	Korea: JJ, Seoguipo, Hawon, Yeongsil (E: 126°35', N: 33°19')	22. VII. 2009	Alcohol	KJ432998	This study
111	Denticollini	H. (s. str.) hallaensis Kishii, 2002 stat. nov.	1055	Korea: JJ, Seoguipo, Hawon, Yeongsil (E: 126°35', N: 33°19')	22. VII. 2009	Alcohol	KJ432999	This study
112	Denticollini	H. (s. str.) hallaensis Kishii, 2002 stat. nov.	1057	Korea: JJ, Seoguipo, Hawon, Yeongsil (E: 126°35', N: 33°19')	22. VII. 2009	Alcohol	KJ433000	This study
113	Denticollini	H. (s. str.) hallaensis Kishii, 2002 stat. nov.	1102	Korea: JJ, Seongpanak (E: 126°37', N: 33°23')	15-29. VIII. 2007	Alcohol	KJ433001	This study
114	Denticollini	H. (s. str.) hallaensis Kishii, 2002 stat. nov.	1103	Korea: JJ, Seongpanak (E: 126°37', N: 33°23')	15-29. VIII. 2007	Alcohol	KJ433002	This study
115	Denticollini	H. (s. str.) hallaensis Kishii, 2002 stat. nov.	1104	Korea: JJ, Seongpanak (E: 126°37', N: 33°23')	15-29. VIII. 2007	Alcohol	KJ433003	This study
116	Denticollini	H. (s. str.) sp. 2, candidate new species	1037	Korea: GW, Temple Gyebangsa (E: 128°27', N: 37°43')	11. VII. 2009	Alcohol	KJ433004	This study
117	Denticollini	H. (s. str.) sp. 2, candidate new species	1038	Korea: GW, Temple Gyebangsa (E: 128°27', N: 37°43')	11. VII. 2009	Alcohol	KJ433005	This study
118	Denticollini	H. (s. str.) sp. 2, candidate new species	1039	Korea: GW, Temple Gyebangsa (E: 128°27', N: 37°43')	11. VII. 2009	Alcohol	KJ433006	This study
119	Denticollini	H. (s. str.) sp. 2, candidate new species	2828	Korea: GW, Sockcho, Ojackgol, Mt. Seolak (E: 128°27', N: 38°07')	7. VII-26. VIII. 2010	Alcohol	KJ433007	This study
120	Denticollini	H. (s. str.) sp. 2, candidate new species	2825	Korea: GW, Sockcho, Ojackgol, Mt. Seolak (E: 128°27', N: 38°07')	7. VII-26. VIII. 2010	Alcohol	KJ433008	This study
121	Denticollini	H. (s. str.) sp. 2, candidate new species	2826	Korea: GW, Sockcho, Ojackgol, Mt. Seolak (E: 128°27', N: 38°07')	7. VII-26. VIII. 2010	Alcohol	KJ433009	This study
122	Denticollini	H. (s. str.) sp. 2, candidate new species	2827	Korea: GW, Sockcho, Ojackgol, Mt. Seolak (E: 128°27', N: 38°07')	7. VII-26. VIII. 2010	Alcohol	KJ433010	This study
123	Denticollini	H. (s. str.) oblongus (Solsky, 1871)	2397	Russia: Primorsky Krai (E: 135°00', N: 45°03')	16-19. VII. 2005	Dried	KJ433011	This study
124	Denticollini	H. (s. str.) oblongus (Solsky, 1871)	955	Korea: GG, Anyang, Anyang botanical garden (E: 127°03', N: 37°24')	5-19. VII. 2007	Dried	KJ433012	This study
125	Denticollini	H. (s. str.) oblongus (Solsky, 1871)	963	Korea: GG, Anyang, Anyang botanical garden (E: 127°03', N: 37°24')	20. VII-31. VIII. 2007	Alcohol	KJ433013	This study
126	Denticollini	H. (s. str.) oblongus (Solsky, 1871)	3219	Korea: GW, Chuncheon, Namsan, Bangha (E: 127°32', N: 37°47')	6. VII. 2011	Frozen	KJ433014	This study
127	Denticollini	H. (s. str.) oblongus (Solsky, 1871)	3220	Korea: GW, Chuncheon, Namsan, Bangha (E: 127°32', N: 37°47')	6. VII. 2011	Frozen	KJ433015	This study
128	Denticollini	H. (s. str.) oblongus (Solsky, 1871)	2713	Korea: GW, Pyeongchang, Jinbu, Mt. Odae, Temple Sangwonsa (E: 128°33', N: 37°47')	8. VII. 2010	Frozen	KJ433016	This study
129	Denticollini	H. (s. str.) oblongus (Solsky, 1871)	891	Korea: GW, Yanggu, Dong-myeon Wondang, Botany garden of Yanggu (E: 128°04', N: 38°11')	4. VII. 2009	Dried	KJ433017	This study
130	Denticollini	H. (s. str.) oblongus (Solsky, 1871)	3218	Korea: GW, Chuncheon, Namsan, Bangha (E: 127°32', N: 37°47')	6. VII. 2011	Frozen	KJ433018	This study
131	Denticollini	H. (s. str.) oblongus (Solsky, 1871)	952	Korea: GG, Anyang, Anyangbotanical garden (E: 127°03', N: 37°24')	5-19. VII. 2007	Dried	KJ433019	This study
132	Denticollini	H. (s. str.) oblongus (Solsky, 1871)	1036	Korea: GW, Temple Gyebangsa (E: 128°27', N: 37°43')	11. VII. 2009	Alcohol	KJ433020	This study
133	Denticollini	H. (s. str.) oblongus (Solsky, 1871)	2855	Korea: GW, Injae, Buk-myeon, Misiryeong (E: 128°26', N: 38°12')	10. V-24. VI. 2010	Alcohol	KJ433021	This study
134	Denticollini	H. (s. str.) oblongus (Solsky, 1871)	2875	Korea: GG, Seoul, Dobong, Uidong, load of Uiryeong (E: 126°59', N: 37°41')	8. VI-9. VIII. 2010	Alcohol	KJ433022	This study
135	Denticollini	H. (s. str.) oblongus (Solsky, 1871)	2808	Korea: GG, Namyangju, Sudong, Mt. Chungryeong (E: 127°19', N: 37°45')	15. VI. 1999	Alcohol	KJ433023	This study
136	Denticollini	H. (s. str.) oblongus (Solsky, 1871)	2854	Korea: GW, Injae, Buk-myeon, Misiryeong (E: 128°26', N: 38°12')	10. V-24. VI. 2010	Alcohol	KJ433024	This study
137	Denticollini	H. (s. str.) oblongus (Solsky, 1871)	2856	Korea: GW, Injae, Buk-myeon, Misiryeong (E: 128°26', N: 38°12')	10. V-24. VI. 2010	Alcohol	KJ433025	This study
138	Denticollini	H. (s. str.) oblongus (Solsky, 1871)	2863	Korea: GG, Seoul, Jeongneung, Vally Jeongneung (E: 127°00', N: 37°36')	10. VI-7. IX. 2010	Alcohol	KF317246	Han et al. (2013, unpublished)
139	Denticollini	H. (s. str.) oblongus (Solsky, 1871)	2864	Korea: GG, Seoul, Jeongneung, Vally Jeongneung (E: 127°00', N: 37°36')	10. VI-7. IX. 2010	Alcohol	KJ433026	This study
140	Denticollini	H. (s. str.) oblongus (Solsky, 1871)	2871	Korea: GG, Seoul, Dobong, Uidong, load of Uiryeong (E: 126°59', N: 37°41')	8. VI-9. VIII. 2010	Alcohol	KJ433027	This study
141	Denticollini	H. (s. str.) oblongus (Solsky, 1871)	2891	Korea: GG, seoul, Mt. Bukhan	17. IX. 2010	Alcohol	KJ433028	This study
142	Denticollini	H. (s. str.) oblongus (Solsky, 1871)	2395	Russia: Primorsky Krai (E: 135°00', N: 45°03')	16-19. VII. 2005	Dried	KJ433029	This study
143	Denticollini	H. (s. str.) oblongus (Solsky, 1871)	2396	Russia: Primorsky Krai (E: 135°00', N: 45°03')	16-19. VII. 2005	Dried	KJ433030	This study
144	Denticollini	H. (s. str.) sinuatus sinuatus (Lewis, 1894)	2524	Japan: Tokyo, Meguro, Kobama, Campus in Univ. of Tokyo (E: 139°41', N: 35°38')	24. VI. 2006	Dried	KJ433031	This study
145	Denticollini	H. (s. str.) seccesus seccessus (Candèze, 1873)	206	Japan	–	Dried	KJ433032	This study
146	Denticollini	H. (s. str.) seccesus seccessus (Candèze, 1873)	2520	Japan	8. VII. 2004	Dried	KJ433033	This study
147	Denticollini	H. (s. str.) seccesus seccessus (Candèze, 1873)	2521	Japan	8. VII. 2004	Dried	KJ433034	This study
148	Denticollini	H. (s. str.) seccesus seccessus (Candèze, 1873)	2522	Japan	8. VII. 2004	Dried	KJ433035	This study
149	Denticollini	H. (s. str.) seccesus seccessus (Candèze, 1873)	2523	Japan: Nagano Pref, Otari-mura, Otari onsen 1096-1130m (E: 137°58', N: 36°51')	27. VI. 2006	Dried	KJ433036	This study
150	Denticollini	H. (s. str.) seccesus seccessus (Candèze, 1873)	2525	Japan: Gifu Pref, Sekigahara-cho (E: 136°28', N: 35°21')	29. VI. 2006	Dried	KJ433037	This study
151	Denticollini	H. (s. str.) seccesus seccessus (Candèze, 1873)	1131	Japan: Honshu, Ibaraki, Mt. Bukuba (E: 140°05', N: 35°57')	13. VII. 2009	Alcohol	KJ433038	This study
152	Denticollini	H. (s. str.) seccesus seccessus (Candèze, 1873)	1132	Japan: Honshu, Ibaraki, Mt. Bukuba (E: 140°05', N: 35°57')	13. VII. 2009	Alcohol	KJ433039	This study
153	Denticollini	H. (s. str.) seccesus seccessus (Candèze, 1873)	3077	Japan: Honshu, Ibaraki, Daigo, Uenomiya, Daido, Mt. Yamizo, 1015m (E: 140°21', N: 36°46')	13. XI. 2010	Alcohol	KJ433040	This study
154	Denticollini	H. (s. str.) seccesus seccessus (Candèze, 1873)	3078	Japan: Honshu, Ibaraki, Daigo, Uenomiya, Daido, Mt. Yamizo, 1015m (E: 140°21', N: 36°46')	13. XI. 2010	Alcohol	KJ433041	This study
155	Denticollini	H. (s. str.) desertor desertor (Candèze, 1873)	1133	Japan: Honshu, Ibaraki, Mt. Bukuba (E: 140°05', N: 35°57')	13. VII. 2009	Alcohol	KJ433042	This study
156	Denticollini	H. (s. str.) desertor desertor (Candèze, 1873)	1138	Japan: Honshu, Mt. Fuji East slope (E: 138°43', N: 35°21')	9. VII. 2009	Alcohol	KJ433043	This study
157	Denticollini	H. (s. str.) niger (Linnaeus, 1758)	–	Austria: Aldrans, Tyrol	29. VI. 1998	–	HM542060	[24]
158	Denticollini	H. (s. str.) memnonius (Herbst, 1806)	–	Canada: Wellington County, Ontario	16. VII. 2002	–	AY165705	[11]
159	Denticollini	H. (Miwacrepidius) rubriventris Han and Park, 2013	3292	Korea: GG, Gapyeong, Mt. Yeonin (E: 127°25', N: 37°53')	9. VII. 2011	Frozen	KF442243	[46]
160	Denticollini	H. (Miwacrepidius) rubriventris Han and Park, 2013	3442	Korea: GW, Jeongsun, Mt. Gariwang (E: 128°33', N: 37°27')	16. VIII. 2012	Alcohol	KF442244	[46]
161	Denticollini	H. (Miwacrepidius) rubriventris Han and Park, 2013	3443	Korea: GW, Jeongsun, Mt. Gariwang (E: 128°33', N: 37°27')	2. VIII. 2012	Alcohol	KF442245	[46]
162	Denticollini	H. (Miwacrepidius) subcyaneus (Motschulsky, 1866)	3650	Japan: Honshu, Hamanashi pref, Yamato-mura, Sasago-toge (E: 138°41', N: 35°41')	2. VIII. 1987	Dried	KF442247*	[46]
163	Denticollini	H. (Miwacrepidius) subcyaneus (Motschulsky, 1866)	3682	Japan: Honshu, Gunma Pref., Tano-gun, Ueno-mura, Occhisawa (E: 138°47', N: 36°05')	30. VI. 2013	Dried	KF442246	[46]
164	Denticollini	Yukara inornatus (Lewis, 1894)	2581	Russia: Sakhalin, Kholmsk, Chapavevo-2 (E: 142°04', N: 47°03')	14. VII. 2008	Alcohol	KJ433044	This study
165	Denticollini	Yukara inornatus (Lewis, 1894)	2584	Russia: Sakhalin, Kholmsk, Nar van-Mar (E: 142°04', N: 47°03')	15. VII. 2008	Alcohol	KJ433045	This study
166	Denticollini	Yukara inornatus (Lewis, 1894)	2587	Russia: Sakhalin, Kholmsk, Pozharskove (E: 142°04', N: 47°03')	15. VII. 2008	Alcohol	KJ433046	This study
167	Denticollini	Yukara inornatus (Lewis, 1894)	2588	Russia: Sakhalin, Kholmsk, Pozharskove (E: 142°04', N: 47°03')	15. VII. 2008	Alcohol	KJ433047	This study
168	Denticollini	Yukara inornatus (Lewis, 1894)	2590	Russia: Sakhalin, Korsakov, Chapavevo-2 (E: 142°47', N: 46°38')	18. VII. 2008	Alcohol	KJ433048	This study
169	Denticollini	Yukara inornatus (Lewis, 1894)	2591	Russia: Sakhalin, Korsakov, Chapavevo-2 (E: 142°47', N: 46°38')	18. VII. 2008	Alcohol	KJ433049	This study
170	Denticollini	Yukara inornatus (Lewis, 1894)	2592	Russia: Sakhalin, Korsakov, Chapavevo-2 (E: 142°47', N: 46°38')	18. VII. 2008	Alcohol	KJ433050	This study
171	Denticollini	Yukara inornatus (Lewis, 1894)	2593	Russia: Sakhalin, Korsakov, Chapavevo-2 (E: 142°47', N: 46°38')	18. VII. 2008	Alcohol	KJ433051	This study
172	Denticollini	Yukara inornatus (Lewis, 1894)	2594	Russia: Sakhalin, Korsakov, Chapavevo-2 (E: 142°47', N: 46°38')	18. VII. 2008	Alcohol	KJ433052	This study
173	Denticollini	Yukara inornatus (Lewis, 1894)	2595	Russia: Sakhalin, Korsakov, Chapavevo-2 (E: 142°47', N: 46°38')	18. VII. 2008	Alcohol	KJ433053	This study
174	Denticollini	Yukara inornatus (Lewis, 1894)	2597	Russia: Sakhalin, Yuzhno-Sakhalinsk, Vestochka (E: 142°43', N: 46°59')	18. VII. 2008	Alcohol	KJ433054	This study
175	Denticollini	Yukara inornatus (Lewis, 1894)	2598	Russia: Sakhalin, Yuzhno-Sakhalinsk, Vestochka (E: 142°43', N: 46°59')	18. VII. 2008	Alcohol	KJ433055	This study
176	Denticollini	Yukara inornatus (Lewis, 1894)	2599	Russia: Sakhalin, Yuzhno-Sakhalinsk, Vestochka (E: 142°43', N: 46°59')	18. VII. 2008	Alcohol	KJ433056	This study
177	Denticollini	Yukara inornatus (Lewis, 1894)	2600	Russia: Sakhalin, Yuzhno-Sakhalinsk, Vestochka (E: 142°43', N: 46°59')	18. VII. 2008	Alcohol	KJ433057	This study
178	Denticollini	Yukara inornatus (Lewis, 1894)	2601	Russia: Sakhalin, Korsakov, Chapavevo-2 (E: 142°47', N: 46°38')	18. VII. 2008	Alcohol	KJ433058	This study
179	Denticollini	Yukara inornatus (Lewis, 1894)	2604	Russia: Sakhalin, Kholmsk, Nar van-Mar (E: 142°04', N: 47°03')	15. VII. 2008	Alcohol	KJ433059	This study
180	Denticollini	Yukara inornatus (Lewis, 1894)	2605	Russia: Sakhalin, Yuzhno-Sakhalinsk, Vestochka (E: 142°43', N: 46°59')	18. VII. 2008	Alcohol	KJ433060	This study
181	Denticollini	Yukara inornatus (Lewis, 1894)	2568	Russia: Sakhalin, Yuzhno-Sakhalinsk, Vestochka (E: 142°43', N: 46°59')	18. VII. 2008	Alcohol	KJ433061	This study
182	Denticollini	Yukara inornatus (Lewis, 1894)	2569	Russia: Sakhalin, Yuzhno-Sakhalinsk, Vestochka (E: 142°43', N: 46°59')	18. VII. 2008	Alcohol	KJ433062	This study
183	Denticollini	Yukara inornatus (Lewis, 1894)	2570	Russia: Sakhalin, Korsakov, Chapavevo-2 (E: 142°47', N: 46°38')	18. VII. 2008	Alcohol	KJ433063	This study
184	Denticollini	Denticollini gen. and sp. 1 , candidate new genus and species	1035	Korea: GW, Temple Gyebangsa (E: 128°27', N: 37°43')	11. VII. 2009	Alcohol	KJ433064	This study
185	Denticollini	Denticollini gen. and sp. 1 , candidate new genus and species	3336	Korea: GN, Sancheong, Sicheon, Jeungsan, Mt. Jiri (E: 127°44', N: 35°19')	13. VII-12. XI. 2011	Alcohol	KJ433065	This study
186	Denticollini	Denticollini gen. and sp. 1 , candidate new genus and species	3337	Korea: GN, Sancheong, Sicheon, Jeungsan, Mt. Jiri (E: 127°44', N: 35°19')	13. VII-12. XI. 2011	Alcohol	KJ433066	This study
187	Denticollini	Denticollini gen. and sp. 1 , candidate new genus and species	3386	Korea: GB, Bonghwa, Seockpo-ri (E: 129°06', N: 37°03')	31. VII. 2012	Alcohol	KJ433067	This study
188	Denticollini	Denticollini gen. and sp. 1 , candidate new genus and species	3392	Korea: GB, Bonghwa, Seockpo-ri (E: 129°06', N: 37°03')	31. VII. 2012	Alcohol	KJ433068	This study
189	Denticollini	Denticollini gen. and sp. 1 , candidate new genus and species	3393	Korea: GB, Bonghwa, Seockpo-ri (E: 129°06', N: 37°03')	31. VII. 2012	Alcohol	KJ433069	This study
190	Denticollini	Denticollini gen. and sp. 1 , candidate new genus and species	3399	Korea: GB, Bonghwa, Seockpo-ri (E: 129°06', N: 37°03')	31. VII. 2012	Alcohol	KJ433070	This study
191	Denticollini	Denticollini gen. and sp. 1 , candidate new genus and species	3400	Korea: GB, Bonghwa, Seockpo-ri (E: 129°06', N: 37°03')	31. VII. 2012	Alcohol	KJ433071	This study
192	Denticollini	Denticollini gen. and sp. 1 , candidate new genus and species	3401	Korea: GB, Bonghwa, Seockpo-ri (E: 129°06', N: 37°03')	31. VII. 2012	Alcohol	KJ433072	This study
193	Denticollini	Denticollini gen. and sp. 1 , candidate new genus and species	3424	Korea: GB, Bonghwa, Seockpo-ri (E: 129°06', N: 37°03')	3. VII. 2012	Alcohol	KJ433073	This study
194	Denticollini	Scutellathous porrecticollis (Lewis, 1894)	2099	Korea: GB, Yeongju (E: 128°37', N: 36°48')	23. VII-7. VIII. 2009	Alcohol	KJ433074	This study
195	Denticollini	Scutellathous porrecticollis (Lewis, 1894)	2100	Korea: GB, Yeongju (E: 128°37', N: 36°48')	23. VII-7. VIII. 2009	Alcohol	KJ433075	This study
196	Denticollini	Scutellathous porrecticollis (Lewis, 1894)	2869	Korea: GG, Seoul, Gangbuk, Vally Suyoo (E: 127°00', N: 37°38')	10. V-7. IX. 2010	Alcohol	KJ433076	This study
197	Denticollini	Scutellathous porrecticollis (Lewis, 1894)	3331	Korea: GN, Sancheong, Sicheon, Mt. Jiri (E: 127°44', N: 35°19')	13. VII-12. XI. 2011	Alcohol	KJ433077	This study
198	Denticollini	Scutellathous porrecticollis (Lewis, 1894)	3332	Korea: GN, Hamyang, macheon, Mt. Jiri (E: 127°39', N: 35°23')	14. VII-11. XI. 2011	Alcohol	KF317257	Han et al. (2013, unpublished)
199	Denticollini	Scutellathous porrecticollis (Lewis, 1894)	3333	Korea: GN, Hamyang, macheon, Mt. Jiri (E: 127°39', N: 35°23')	14. VII-11. XI. 2011	Alcohol	KJ433078	This study
200	Denticollini	Scutellathous porrecticollis (Lewis, 1894)	3335	Korea: GN, Hamyang, macheon, Mt. Jiri (E: 127°39', N: 35°23')	14. VII-11. XI. 2011	Alcohol	KJ433079	This study
201	Denticollini	Scutellathous porrecticollis (Lewis, 1894)	3334	Korea: GN, Hamyang, macheon, Mt. Jiri (E: 127°39', N: 35°23')	14. VII-11. XI. 2011	Alcohol	KJ433080	This study
202	Denticollini	Scutellathous porrecticollis (Lewis, 1894)	3385	Korea: GB, Bonghwa, Seockpo-ri (E: 129°06', N: 37°03')	31. VII. 2012	Alcohol	KJ433081	This study
203	Denticollini	Scutellathous porrecticollis (Lewis, 1894)	3394	Korea: GB, Bonghwa, Seockpo-ri (E: 129°06', N: 37°03')	31. VII. 2012	Alcohol	KJ433082	This study
204	Denticollini	Scutellathous comes (Lewis, 1894)	3083	Japan: Honshu, Ibaraki, Daigo, Uenomiya, Daido, Mt. Yamizo, 1015m (E: 140°21', N: 36°46')	13. VII. 2010	Alcohol	KJ433083	This study
205	Denticollini	Scutellathous spec ozaki Ôhira, 1992 (= S. sp. 1 in NCBI)	3088	Japan: Honshu, Fukushima, Higashi-shirakawa, Tanagura, Manahatayamizo-ridou, 893m ((E: 137°19', N: 35°38')	28. VII. 2010	Alcohol	KJ433084	This study
206	Denticollini	Ohirathous nantouensis Han and Park, 2012	3255	Taiwan: Nantou, Ching jing Farm (E: 121°09', N: 24°03')	9. VII. 2001	Frozen	KF317254	Han et al. (2013, unpublished)
207	Denticollini	Megathous dauricus (Mannerheim, 1852)	2351	Mongolia: Bornuur Region (E: 106°15', N: 48°27')	1. VI-6. VII. 2009	Alcohol	KJ433085	This study
208	Denticollini	Diacanthous undulatus (DeGeer, 1774)	2655	Korea: GW, Pyeongchang, Jinbu, Dongsan, Mt. Odae, Sangwonsa (E: 128°33', N: 37°47')	18. VI. 2010	Alcohol	KJ433086	This study
209	Denticollini	Diacanthous undulatus (DeGeer, 1774)	2656	Korea: GW, Pyeongchang, Jinbu, Dongsan, Mt. Odae, Sangwonsa (E: 128°33', N: 37°47')	18. VI. 2010	Alcohol	KJ433087	This study
210	Denticollini	Diacanthous undulatus (DeGeer, 1774)	3305	Korea: GW, Pyeongchang, Jinbu, Mt. Odae (E: 128°33', N: 37°47')	10. VI-12. VII. 2012	Alcohol	KF317256	Han et al. (2013, unpublished)
211	Denticollini	Stenagostus sp. 1, candidate new species	2657	Korea: JJ, Jeju, Jocheon, Sunheul, Dongbaek-dongsan (E: 126°43', N: 33°30')	2. VII. 2010	Frozen	KF317242	Han et al. (2013, unpublished)
212	Denticollini	Stenagostus sp. 1, candidate new species	3620	Korea: JJ, Temple Gwaneum (E: 126°33', N: 33°25')	3. VII. 2010	Alcohol	KJ433088	This study
213	Denticollini	Stenagostus sp. 1, candidate new species	3621	Korea: JJ, Temple Gwaneum (E: 126°33', N: 33°25')	3. VII. 2010	Alcohol	KJ433089	This study
214	Denticollini	Stenagostus umbratilis (Lewis, 1894)	3066	Japan: Honshu, Ibaraki, Daigo, Uenomiya, Daido, Mt. Yamizosan, 1015m (E: 140°21', N: 36°46')	13. VII. 2010	Alcohol	KJ433090	This study
215	Denticollini	Stenagostus umbratilis (Lewis, 1894)	3067	Japan: Honshu, Ibaraki, Daigo, Uenomiya, Daido, Mt. Yamizosan, 1015m (E: 140°21', N: 36°47')	13. VII. 2010	Alcohol	KJ433091	This study
216	Denticollini	Stenagostus umbratilis (Lewis, 1894)	3068	Japan: Honshu, Ibaraki, Daigo, Uenomiya, Daido, Mt. Yamizosan, 1015m (E: 140°21', N: 36°48')	13. VII. 2010	Alcohol	KJ433092	This study
217	Denticollini	Stenagostus umbratilis (Lewis, 1894)	3069	Japan: Honshu, Ibaraki, Daigo, Uenomiya, Daido, Mt. Yamizosan, 1015m (E: 140°21', N: 36°49')	13. VII. 2010	Alcohol	KJ433093	This study
218	Denticollini	Stenagostus umbratilis (Lewis, 1894)	3075	Japan: Honshu, Ibaraki, Daigo, Uenomiya, Daido, Mt. Yamizosan, 1015m (E: 140°21', N: 36°50')	13. VII. 2010	Alcohol	KJ433094	This study
219	Denticollini	Stenagostus umbratilis (Lewis, 1894)	3076	Japan: Honshu, Ibaraki, Daigo, Uenomiya, Daido, Mt. Yamizosan, 1015m (E: 140°21', N: 36°51')	13. VII. 2010	Alcohol	KJ433095	This study
220	Denticollini	Stenagostus umbratilis (Lewis, 1894)	3091	Japan: Honshu, Ibaraki, Tsukuba, Mt. Tsukuba (E: 140°06', N: 36°13')	28. VII. 2010	Alcohol	KJ433096	This study
221	Denticollini	Stenagostus umbratilis (Lewis, 1894)	3103	Japan: Honshu, Ibaraki, Tsukuba, Mt. Tsukuba (E: 140°06', N: 36°13')	28. VII. 2010	Alcohol	KJ433097	This study
222	Denticollini	Stenagostus umbratilis (Lewis, 1894)	3104	Japan: Honshu, Ibaraki, Tsukuba, Mt. Tsukuba (E: 140°06', N: 36°13')	28. VII. 2010	Alcohol	KJ433098	This study
223	Denticollini	Stenagostus umbratilis (Lewis, 1894)	3106	Japan: Honshu, Ibaraki, Tsukuba, Mt. Tsukuba (E: 140°06', N: 36°13')	28. VII. 2010	Alcohol	KJ433099	This study
224	Denticollini	Stenagostus umbratilis (Lewis, 1894)	3107	Japan: Honshu, Ibaraki, Tsukuba, Mt. Tsukuba (E: 140°06', N: 36°13')	28. VII. 2010	Alcohol	KJ433100	This study
225	Denticollini	Stenagostus umbratilis (Lewis, 1894)	3108	Japan: Honshu, Ibaraki, Tsukuba, Mt. Tsukuba (E: 140°06', N: 36°13')	28. VII. 2010	Alcohol	KJ433101	This study
226	Denticollini	Stenagostus umbratilis (Lewis, 1894)	3109	Japan: Honshu, Ibaraki, Tsukuba, Mt. Tsukuba (E: 140°06', N: 36°13')	28. VII. 2010	Alcohol	KJ433102	This study
227	Denticollini	Medakathous jactatus jactatus (Lewis, 1894)	3081	Japan: Honshu, Ibaraki, Daigo, Uenomiya, Daido, Mt. Yamizo, 1015m (E: 140°21', N: 36°51')	13. VII. 2010	Alcohol	KF317247	Han et al. (2013, unpublished)
228	Denticollini	Medakathous jactatus jactatus (Lewis, 1894)	3082	Japan: Honshu, Ibaraki, Daigo, Uenomiya, Daido, Mt. Yamizo, 1015m (E: 140°21', N: 36°51')	13. VII. 2010	Alcohol	KJ433103	This study
229	Denticollini	Denticollis nigricollis nigricollis (Gebler, 1830)	212	Korea: GW, Hongcheon, Nae-myeon, Gwangcheon, Gachilbong (E: 128°27', N: 37°52')	9. VI. 1995	Dried	KJ433104	This study
230	Denticollini	Denticollis nigricollis nigricollis (Gebler, 1830)	213	Korea: GW, Injae, Girin, Mt. Bangtae (E: 128°21', N: 37°53')	6. VI. 2000	Dried	KJ433105	This study
231	Denticollini	Denticollis nigricollis nigricollis (Gebler, 1830)	215	Korea: GW, Phyeongchang, Bangrim, Mt. Baekdeok (E: 128°23', N: 37°25')	2. VI. 2001	Dried	KJ433106	This study
232	Denticollini	Denticollis nigricollis nigricollis (Gebler, 1830)	357	Korea: GW, Phyeongchang, Mt. Gyebang (E: 128°27', N: 37°43')	26. VI. 2007	Alcohol	KJ433107	This study
233	Denticollini	Denticollis nigricollis nigricollis (Gebler, 1830)	358	Korea: GW, Phyeongchang, Mt. Gyebang (E: 128°27', N: 37°43')	26. VI. 2007	Alcohol	KJ433108	This study
234	Denticollini	Denticollis nigricollis nigricollis (Gebler, 1830)	359	Korea: GW, Phyeongchang, Mt. Gyebang (E: 128°27', N: 37°43')	26. VI. 2007	Alcohol	KJ433109	This study
235	Denticollini	Denticollis nigricollis nigricollis (Gebler, 1830)	1007	Korea: GW, Phyeongchang, Yongpyeong, Nodong (E: 128°28', N: 37°41')	13. VI. 2009	Frozen	KF317230	Han et al. (2013, unpublished)
236	Denticollini	Denticollis nigricollis nigricollis (Gebler, 1830)	2272	Korea: GW, Pyeongchang, Jinbu, Mt. Odae (E: 128°33', N: 37°47')	29. V. 2009	Alcohol	KJ433110	This study
237	Denticollini	Denticollis nigricollis nigricollis (Gebler, 1830)	2285	Korea: GW, Pyeongchang, Jinbu, Mt. Odae (E: 128°33', N: 37°47')	6. VI. 2009	Alcohol	KJ433111	This study
238	Denticollini	Denticollis nigricollis nigricollis (Gebler, 1830)	2691	Korea: GG, Gapyeong, Cheongpyeong, Mt. Hwaya (E: 127°25', N: 37°40')	4. VI. 2010	Frozen	KJ433112	This study
239	Denticollini	Denticollis nigricollis nigricollis (Gebler, 1830)	2838	Korea: GW, Sockcho, Temple Baekdamsa, Mt. Seolak (E: 128°22', N: 38°09')	1. IV-24. VI. 2010	Alcohol	KJ433113	This study
240	Denticollini	Denticollis nigricollis nigricollis (Gebler, 1830)	3035	Korea: GW, Sockcho, Misiryeong (E: 128°26', N: 38°12')	1. IV-24. VI. 2010	Alcohol	KJ433114	This study
241	Denticollini	Denticollis nigricollis nigricollis (Gebler, 1830)	3404	Korea: GB, Bonghwa, Seockpo-ri (E: 129°06', N: 37°03')	3. VII. 2012	Alcohol	KJ433115	This study
242	Denticollini	Denticollis nigricollis nigricollis (Gebler, 1830)	3405	Korea: GB, Bonghwa, Seockpo-ri (E: 129°06', N: 37°03')	3. VII. 2012	Alcohol	KJ433116	This study
243	Denticollini	Denticollis nigricollis nigricollis (Gebler, 1830)	3422	Korea: GB, Bonghwa, Seockpo-ri (E: 129°06', N: 37°03')	3. VII. 2012	Alcohol	KJ433117	This study
244	Denticollini	Denticollis nigricollis subsp. 1, candidate new subspecies	3343	Korea: JN, Gurae, Nogodan, Mt. Jiri (E: 127°31', N: 35°17')	20. VI-10. XI. 2011	Alcohol	KJ433118	This study
245	Denticollini	Denticollis nigricollis subsp. 1, candidate new subspecies	3345	Korea: JN, Gurae, Nogodan, Mt. Jiri (E: 127°31', N: 35°17')	20. VI-10. XI. 2011	Alcohol	KJ433119	This study
246	Denticollini	Denticollis nigricollis subsp. 1, candidate new subspecies	3346	Korea: JN, Gurae, Nogodan, Mt. Jiri (E: 127°31', N: 35°17')	20. VI-10. XI. 2011	Alcohol	KJ433120	This study
247	Denticollini	Denticollis sp. 1, candidate new sepcies	2306	Korea: GW, Pyeongchang, Jinbu, Mt. Odae (E: 128°33', N: 37°47')	29. V. 2009	Alcohol	KJ433121	This study
248	Denticollini	Denticollis sp. 1, candidate new sepcies	3615	Korea: GW, Injae, Girin, Jindong, Mt. Jeombong (E: 128°25', N: 38°02')	23. V. 2011	Dried	KJ433122	This study
249	Ctenicerini	Corymbitodes sp. 1, candidate new species	2303	Korea: JJ, Temple cheonwangsa (E: 126°30', N: 33°24')	4. VI. 2008	Alcohol	KJ433123	This study
250	Ctenicerini	Corymbitodes sp. 1, candidate new species	2309	Korea: GW, Pyeongchang, Jinbu, Mt. Odae (E: 128°33', N: 37°47')	6. VI. 2009	Alcohol	KF317234	Han et al. (2013, unpublished)
251	Ctenicerini	Corymbitodes sp. 1, candidate new species	2507	Korea: CN, Gongju, Banpo, Mt. Geryeong, Temple Donghaksa (E: 127°13', N: 36°21')	1. V. 2010	Frozen	KJ433124	This study
252	Ctenicerini	Corymbitodes sp. 1, candidate new species	2792	Korea: GW, Yeongwol, Jungdong, Jikdong, Duwibong (E: 128°40', N: 37°08')	21. V. 2010	Alcohol	KJ433125	This study
253	Ctenicerini	Corymbitodes sp. 1, candidate new species	2804	Korea: GW, Injae, Mt. Odae (E: 128°33', N: 37°47')	28. V. 2009	Alcohol	KJ433126	This study
254	Ctenicerini	Corymbitodes rubripennis (Lewis, 1894)	–	Japan: Honshu, Nara, Kamikitayama, Odaigahara (E: 135°59', N: 34°08')	–	–	AB375513	[22]
255	Ctenicerini	Corymbitodes sp. 2, candidate new species	2781	Korea: GN, Ulju, Sangbok, Mt. Shinbul (E: 129°03', N: 35°32')	21. V. 2010	Alcohol	KJ433127	This study
256	Ctenicerini	Corymbitodes sp. 2, candidate new species	2787	Korea: CB, Danyang, Daegang, Ulsan, Jeosuryeong (E: 128°21', N: 36°55')	22. V. 2010	Alcohol	KJ433128	This study
257	Ctenicerini	Corymbitodes sp. 2, candidate new species	2788	Korea: GW, Yeongwol, Jungdong, Jikdong, Duwibong (E: 128°40', N: 37°08')	21. V. 2010	Alcohol	KJ433129	This study
258	Ctenicerini	Corymbitodes sp. 2, candidate new species	2790	Korea: GW, Yeongwol, Jungdong, Jikdong, Duwibong (E: 128°40', N: 37°08')	21. V. 2010	Alcohol	KJ433130	This study
259	Ctenicerini	Corymbitodes sp. 2, candidate new species	2791	Korea: GW, Yeongwol, Jungdong, Jikdong, Duwibong (E: 128°40', N: 37°08')	21. V. 2010	Alcohol	KJ433131	This study
260	Ctenicerini	Corymbitodes gratus ((Lewis, 1984)	–	Japan: Shikoku, Ehime, Saijo, Kawagurusu	–	–	AB375512	[22]
261	Ctenicerini	Acteniceromorphus selectus (Candèze, 1865)	2138	Japan: Hokkaido, Jozankei Nature Village 380m (E: 141°09', N: 42°57')	30. VI. 2009	Alcohol	KJ433132	This study
262	Ctenicerini	Acteniceromorphus selectus (Candèze, 1865)	2139	Japan: Hokkaido, Jozankei Nature Village 380m (E: 141°09', N: 42°57')	30. VI. 2009	Alcohol	KJ433133	This study
263	Ctenicerini	Acteniceromorphus selectus (Candèze, 1865)	2141	Japan: Hokkaido, Okusawa, Suigenchi otaru 223m (E: 141°00', N: 43°10')	1. VII. 2009	Alcohol	KJ433134	This study
264	Ctenicerini	Acteniceromorphus selectus (Candèze, 1865)	2142	Japan: Hokkaido, Okusawa, Suigenchi otaru 223m (E: 141°00', N: 43°10')	1. VII. 2009	Alcohol	KJ433135	This study
265	Ctenicerini	Acteniceromorphus selectus (Candèze, 1865)	2143	Japan: Hokkaido, Okusawa, Suigenchi otaru 223m (E: 141°00', N: 43°10')	1. VII. 2009	Alcohol	KJ433136	This study
266	Ctenicerini	Acteniceromorphus selectus (Candèze, 1865)	2144	Japan: Hokkaido, Okusawa, Suigenchi otaru 223m (E: 141°00', N: 43°10')	1. VII. 2009	Alcohol	KJ433137	This study
267	Ctenicerini	Acteniceromorphus selectus (Candèze, 1865)	2145	Japan: Hokkaido, Okusawa, Suigenchi otaru 223m (E: 141°00', N: 43°10')	1. VII. 2009	Alcohol	KJ433138	This study
268	Ctenicerini	Acteniceromorphus selectus (Candèze, 1865)	2160	Japan: Hokkaido, Okusawa, Suigenchi otaru (E: 141°00', N: 43°10')	1. VII. 2009	Alcohol	KJ433139	This study
269	Ctenicerini	Acteniceromorphus ferrugineipennis (Candèze, 1879)	885	Korea: GW, Injae, Temple Bukdaesa (E: 128°22', N: 38°09')	28. V. 2009	Alcohol	KF317226	Han et al. (2013, unpublished)
270	Ctenicerini	Acteniceromorphus ferrugineipennis (Candèze, 1879)	2811	Korea: GW, Injae, Temple Bukdaesa (E: 128°22', N: 38°09')	27. V. 2008	Alcohol	KJ433140	This study
271	Ctenicerini	Acteniceromorphus kurofunei (Miwa, 1934)	–	Japan: Honshu, Nagano, Ina, Nishikomagatake (E: 137°57', N: 35°49')	–	–	AB375511	[22]
272	Ctenicerini	Liotrichus ligneus (Candèze, 1879)	2307	Korea: GW, Pyeongchang, Jinbu, Mt. Odae (E: 128°33', N: 37°47')	6. VI. 2009	Alcohol	KJ433141	This study
273	Ctenicerini	Liotrichus ligneus (Candèze, 1879)	2812	Korea: GW, Injae, Temple Bukdaesa (E: 128°22', N: 38°09')	27. V. 2008	Alcohol	KJ433142	This study
274	Ctenicerini	Aplotarsus imperceptus Gurjeva, 1987	869	Korea: GW, Hongcheon, Dong-myeon, Hongyeon-am (E: 127°56', N: 37°40')	30. V. 2009	Frozen	KJ433143	This study
275	Ctenicerini	Aplotarsus imperceptus Gurjeva, 1987	871	Korea: GW, Hongcheon, Dong-myeon, Sinbong, Temple Dongbongsa (E: 127°56', N: 37°40')	30. V. 2009	Frozen	KF317224	Han et al. (2013, unpublished)
276	Ctenicerini	Aplotarsus imperceptus Gurjeva, 1987	2241	Korea: GW, Pyeongchang, Jinbu, Dongsan, Temple Bukdaesa (E: 128°22', N: 38°09')	28. V. 2009	Alcohol	KJ433144	This study
277	Ctenicerini	Aplotarsus imperceptus Gurjeva, 1987	2242	Korea: GW, Pyeongchang, Jinbu, Dongsan, Temple Bukdaesa (E: 128°22', N: 38°09')	28. V. 2009	Alcohol	KJ433145	This study
278	Ctenicerini	Aplotarsus imperceptus Gurjeva, 1987	2243	Korea: GW, Pyeongchang, Jinbu, Dongsan, Temple Bukdaesa (E: 128°22', N: 38°09')	28. V. 2009	Alcohol	KJ433146	This study
279	Ctenicerini	Aplotarsus imperceptus Gurjeva, 1987	2308	Korea: GW, Pyeongchang, Jinbu, Mt. Odae (E: 128°33', N: 37°47')	6. VI. 2009	Alcohol	KJ433147	This study
280	Ctenicerini	Aplotarsus imperceptus Gurjeva, 1987	2699	Korea: GG, Gapyeong, Cheongpyeong, Mt. Hwaya (E: 127°25', N: 37°40')	4. VI. 2010	Frozen	KJ433148	This study
281	Ctenicerini	Aplotarsus imperceptus Gurjeva, 1987	2816	Korea: GW, Injae, Temple Bukdaesa (E: 128°22', N: 38°09')	27. V. 2008	Alcohol	KJ433149	This study
282	Ctenicerini	Aplotarsus imperceptus Gurjeva, 1987	2836	Korea: GW, Sockcho, Jangsudae, Mt. Seolak (E: 128°27', N: 38°07')	1. IV-24. VI. 2010	Alcohol	KJ433150	This study
283	Ctenicerini	Aplotarsus imperceptus Gurjeva, 1987	3023	Korea: GG, Namyangju, Geumcheon (E: 127°13', N: 37°44')	15. VI. 2007	Alcohol	KJ433151	This study
284	Ctenicerini	Ctenicera pectinicornis (Linnaeus, 1758)	801	Russia: E Russia, Nizhnyi Novgorod reg, Volodarsk dist, Frolischiv (E: 43°10', N: 56°13')	24. VI. 2008	Dried	KJ433152	This study
285	Ctenicerini	Ctenicera pectinicornis (Linnaeus, 1758)	3481	Russia: E Russia, Nizhnyi Novgorod reg, Volodarsk dist, Frolischiv (E: 43°10', N: 56°13')	24. VI. 2008	Dried	KJ433153	This study
286	Ctenicerini	Ctenicera pectinicornis (Linnaeus, 1758)	3482	Russia: St-Petersburg reg, Kirovsk dist, Siniavinov (E: 30°59', N: 59°52')	23. VI. 2009	Dried	KJ433154	This study
287	Ctenicerini	Ctenicera pectinicornis (Linnaeus, 1758)	3483	Russia: St-Petersburg reg, Kirovsk dist, Siniavinov (E: 30°59', N: 59°52')	23. VI. 2009	Dried	KJ433155	This study
288	Ctenicerini	Ctenicera pectinicornis (Linnaeus, 1758)	3484	Russia: St-Petersburg reg, Kirovsk dist, Siniavinov (E: 30°59', N: 59°52')	23. VI. 2009	Dried	KJ433156	This study
289	Ctenicerini	Ctenicera mediana (Germar, 1843)	–	Canada	–	–	AY165675	[11]
290	Ctenicerini	Neopristilophus insitivus (Germar, 1824)	3516	Czech: Moravia, Pouzdrany (E: 16°36', N: 49°11')	6. VI. 2008	Dried	KJ433157	This study
291	Ctenicerini	Ctenicerini gen. and sp. 1, candidate new genus and species	738	Korea: GN, namhae, Mt. Mangun-san, 700m peak (E: 127°53', N: 34°50')	9. IV. 2009	Frozen	KJ433158	This study
292	Ctenicerini	Ctenicerini gen. and sp. 1, candidate new genus and species	739	Korea: GN, namhae (E: 127°53', N: 34°50')	9. IV. 2009	Frozen	KJ433159	This study
293	Ctenicerini	Ctenicerini gen. and sp. 1, candidate new genus and species	740	Korea: GN, namhae, Temple Hwabangsa (E: 127°53', N: 34°50')	9. IV. 2009	Frozen	KJ433160	This study
294	Ctenicerini	Ctenicerini gen. and sp. 1, candidate new genus and species	741	Korea: GN, namhae, Temple Hwabangsa (E: 127°53', N: 34°50')	9. IV. 2009	Frozen	KJ433161	This study
295	Ctenicerini	Ctenicerini gen. and sp. 1, candidate new genus and species	742	Korea: GN, namhae, Temple Hwabangsa (E: 127°53', N: 34°50')	9. IV. 2009	Frozen	KJ433162	This study
296	Ctenicerini	Ctenicerini gen. and sp. 1, candidate new genus and species	743	Korea: GN, namhae, Temple Hwabangsa (E: 127°53', N: 34°50')	9. IV. 2009	Frozen	KJ433163	This study
297	Ctenicerini	Ctenicerini gen. and sp. 1, candidate new genus and species	2805	Korea: GW, Injae, Mt. Odae (E: 128°33', N: 37°47')	28. V. 2009	Alcohol	KJ433164	This study
298	Ctenicerini	Ctenicerini gen. and sp. 1, candidate new genus and species	2814	Korea: GW, Injae, Temple Bukdaesa (E: 128°22', N: 38°09')	27. V. 2008	Alcohol	KJ433165	This study
299	Ctenicerini	Ctenicerini gen. and sp. 1, candidate new genus and species	2890	Korea: GG, Songchu, Mt. Bukhan (E: 126°59', N: 37°42')	6. VI. 2010	Alcohol	KJ433166	This study
300	Ctenicerini	Ctenicerini gen. and sp. 1, candidate new genus and species	3113	Korea: GG, Pocheon, Soheul, Gwangreung (E: 127°09', N: 37°45')	15. IV. 2011	Frozen	KJ433167	This study
301	Ctenicerini	Ctenicerini gen. and sp. 1, candidate new genus and species	3115	Korea: GG, Gapyeong, Hyeon-ri (E: 127°20', N: 37°49')	15. V. 2011	Frozen	KJ433168	This study
302	Ctenicerini	Ctenicerini gen. and sp. 2, candidate new genus and species	3348	Korea: JN, Gurae, Piagol, Mt. Jiri (E: 127°35', N: 35°14')	10. III-15. VII. 2011	Alcohol	KJ433169	This study
303	Ctenicerini	Ctenicerini gen. and sp. 2, candidate new genus and species	3349	Korea: JN, Gurae, Nogodan, Mt. Jiri (E: 127°31', N: 35°17')	20. V-10. XI. 2011	Alcohol	KJ433170	This study
304	Ctenicerini	Ctenicerini gen. and sp. 2, candidate new genus and species	3350	Korea: JN, Gurae, Nogodan, Mt. Jiri (E: 127°31', N: 35°17')	20. V-10. XI. 2011	Alcohol	KJ433171	This study
305	Ctenicerini	Poemnites katalinbodorae Platia and Németh, 2011	2896	Korea: GG, Uijeongbu, Angol, Mt. Satae-san in Mt. Bukhan (E: 126°59', N: 37°39')	8. VI. 2010	Alcohol	KJ433172	This study
306	Ctenicerini	Poemnites katalinbodorae Platia and Németh, 2011	2897	Korea: GG, Uijeongbu, Angol, Mt. Satae-san in Mt. Bukhan (E: 126°59', N: 37°39')	8. VI. 2010	Alcohol	KJ433173	This study
307	Ctenicerini	Poemnites katalinbodorae Platia and Németh, 2011	865	Korea: GG, Yangpyeong, Cheongun, Sindae (E: 127°48', N: 37°35')	29. V. 2009	Frozen	KJ433174	This study
308	Ctenicerini	Poemnites katalinbodorae Platia and Németh, 2011	882	Korea: GG, Yangpyeong, Cheongun, Shinnae, Mt. Galgi (E: 127°48', N: 37°35')	4. VI. 2009	Frozen	KF317225	Han et al. (2013, unpublished)
309	Ctenicerini	Poemnites katalinbodorae Platia and Németh, 2011	883	Korea: GG, Yangpyeong, Cheongun, Shinnae, Mt. Galgi (E: 127°48', N: 37°35')	4. VI. 2009	Frozen	KJ433175	This study
310	Ctenicerini	Actenicerus infirmus (Reitter, 1892)	227	Korea: JJ, Seongpanak (E: 126°37', N: 33°23')	5. VI. 2007	Alcohol	KJ433176	This study
311	Ctenicerini	Actenicerus infirmus (Reitter, 1892)	363	Korea: JJ, Mt. Hanlla, 1400 Peak (E: 126°31', N: 33°21')	22. V. 2008	Alcohol	KJ433177	This study
312	Ctenicerini	Actenicerus infirmus (Reitter, 1892)	816	Korea: JJ, Mt. Hanlla, 1400 Peak (E: 126°31', N: 33°21')	10. V. 2009	Frozen	KJ433178	This study
313	Ctenicerini	Actenicerus infirmus (Reitter, 1892)	817	Korea: JJ, Mt. Hanlla, 1400 Peak (E: 126°31', N: 33°21')	10. V. 2009	Frozen	KJ433179	This study
314	Ctenicerini	Actenicerus infirmus (Reitter, 1892)	818	Korea: JJ, Mt. Hanlla, 1400 Peak (E: 126°31', N: 33°21')	10. V. 2009	Frozen	KJ433180	This study
315	Ctenicerini	Actenicerus infirmus (Reitter, 1892)	2269	Korea: JJ, Jeju, Ara1-dong, Temple Gwanumsa (E: 126°32', N: 33°23')	8. V. 2009	Alcohol	KJ433181	This study
316	Ctenicerini	Actenicerus infirmus (Reitter, 1892)	3039	Korea: JN, Shinan, Docho, Is. Chuja-do (E: 126°19', N: 33°59')	22. V. 2008	Frozen	KJ433182	This study
317	Ctenicerini	Actenicerus infirmus (Reitter, 1892)	1049	Korea: JJ, Seoguipo, Hawon, Yeongsil (E: 126°33', N: 33°22')	22. VII. 2009	Alcohol	KJ433183	This study
318	Ctenicerini	Actenicerus infirmus (Reitter, 1892)	2802	Korea: GN, Milyang, Jeungsan, Gain (E: 128°44', N: 35°30')	2. V. 2010	Alcohol	KJ433184	This study
319	Ctenicerini	Actenicerus infirmus (Reitter, 1892)	2506	Korea: JN, Yeosu (E: 127°39', N: 47°45')	30. IV. 2010	Frozen	KJ433185	This study
320	Ctenicerini	Actenicerus infirmus (Reitter, 1892)	3249	Korea: GW, Yeongwol (E: 128°27', N: 37°11')	27. V. 2011	Frozen	KF317252	Han et al. (2013, unpublished)
321	Ctenicerini	Actenicerus alternatus (Heyden, 1886)	2403	Russia: Primorsky Krai (E: 135°00', N: 45°03')	4-6. VI. 2007	Dried	KJ433186	This study
322	Ctenicerini	Actenicerus alternatus (Heyden, 1886)	2404	Russia: Primorsky Krai (E: 135°00', N: 45°03')	4-9. VI. 2005	Dried	KJ433187	This study
323	Ctenicerini	Actenicerus alternatus (Heyden, 1886)	3309	Korea: GW, Pyeongchang, Jinbu, Daekwanryeong (E: 128°45', N: 37°41')	12. VII. 2012	Frozen	KJ433188	This study
324	Ctenicerini	Actenicerus odaisanus (Miwa, 1928)	–	Japan: Honshu, Nara, Kamikitayama, Odaigahara (E: 135°59', N: 34°08')	–	–	AB375506	[22]
325	Ctenicerini	Actenicerus orientalis (Candèze, 1889)	–	Japan: Honshu, Shiga, Ika, Yogo, Kushimi (E: 135°52', N: 35°00')	–	–	AB375507	[22]
326	Ctenicerini	Actenicerus pruinosus Motschulsky, 1861	–	Japan: Honshu, Kyoto, Sakyo, Hanase-Sugi (E: 135°46', N: 35°12')	–	–	AB375509	[22]
327	Ctenicerini	Actenicerus yamashiro Kishii, 1998	–	Japan: Honshu, Kyoto, Sakyo, Hanase-Sugi (E: 135°46', N: 35°12')	–	–	AB375510	[22]
328	Ctenicerini	Actenicerus suzukii (Miwa, 1928)	–	Japan: Honshu, Aichi, Shinshiro, Naganoyama (E: 137°29', N: 34°53')	–	–	AB375508	[22]
329	Ctenicerini	Actenicerus naomii Kishii, 1996	–	Japan: Shikoku, Ehime, Niihama, Douzangoe (E: 133°17', N: 33°57')	–	–	AB375505	[22]
330	Ctenicerini	Actenicerus kidonoi Ôhira, 2006	–	Japan: Honshu, Aichi, Okazaki, Kuwabara (E: 137°16', N: 34°54')	–	–	AB375504	[22]
331	Ctenicerini	Actenicerus kiashianus (Miwa, 1928)	–	Japan: Honshu, Aichi, Seto, Jokoji (E: 137°05', N: 35°13')	–	–	AB375503	[22]
332	Ctenicerini	Actenicerus giganteus (Kishii, 1975)	–	Japan: Honshu, Mie, Inabe, Fujiwara, Hongo (E: 136°26', N: 35°13')	–	–	AB375502	[22]
333	Ctenicerini	Actenicerus athoides (Kishii, 1955)	–	Japan: Honshu, Aomori, Towada, Sarukura (E: 141°12', N: 40°36')	–	–	AB375501	[22]
334	Ctenicerini	Actenicerus aerosus (Lewis, 1879)	–	Japan: Honshu, Nara, Kasugano, Mt. Kasuga (E: 135°50', N: 34°41')	–	–	AB375500	[22]
335	Ctenicerini	Actenicerus sjaelandicus (Müller, 1764)	–	Austria: Tyrol (E: 11°36', N: 47°15')	25. V. 2003	–	HM542009	[24]
336	Ctenicerini	Pristilophus melancholichus melancholicus (Fabricius 1798)	799	Russia: SE Siberia, N Chita reg, Kodar Mt. mg, Leprindo Lake, 1800m (E: 113°22', N: 52°02')	20. VI. 2003	Dried	KJ433189	This study
337	Ctenicerini	Selatosomus (s. str.) coreanus (Miwa, 1928)	824	Korea: GG, Uiwang, Hakui, Mt. Cheonggye (E: 127°02', N: 37°24')	22. V. 2009	Frozen	KJ433190	This study
338	Ctenicerini	Selatosomus (s. str.) coreanus (Miwa, 1928)	875	Korea: GW, Injae, Girin, Jindong (E: 128°27', N: 37°59')	13. VI. 2009	Frozen	KJ433191	This study
339	Ctenicerini	Selatosomus (s. str.) coreanus (Miwa, 1928)	2796	Korea: GG, Uiwang, Hakui, Mt. Cheonggye (E: 127°02', N: 37°24')	6. VI. 2006	Frozen	KJ433192	This study
340	Ctenicerini	Selatosomus (s. str.) coreanus (Miwa, 1928)	2797	Korea: GW, Pyeongchang, Temple Woljeongsa in Mt. Odae (E: 128°35', N: 37°43')	26. VIII. 2009	Alcohol	KJ433193	This study
341	Ctenicerini	Selatosomus (s. str.) coreanus (Miwa, 1928)	2831	Korea: GW, Sockcho, Jangsudae, Mt. Seolak (E: 128°27', N: 38°07')	1. IX-24. VI. 2010	Alcohol	KJ433194	This study
342	Ctenicerini	Selatosomus (s. str.) coreanus (Miwa, 1928)	2837	Korea: GW, Sockcho, Temple Baekdamsa, Mt. Seolak (E: 128°27', N: 38°07')	1. IX-24. VI. 2010	Alcohol	KJ433195	This study
343	Ctenicerini	Selatosomus (s. str.) coreanus (Miwa, 1928)	2844	Korea: GW, Yangyang, Seo-myeon, Osaek, Osaekyacksu (E: 128°26', N: 38°04')	29. VIII. 2010	Alcohol	KJ433196	This study
344	Ctenicerini	Selatosomus (s. str.) coreanus (Miwa, 1928)	2853	Korea: GW, Injae, Buk-myeon, Misiryeong (E: 128°26', N: 38°12')	10. V-24. VI. 2010	Alcohol	KJ433197	This study
345	Ctenicerini	Selatosomus (s. str.) coreanus (Miwa, 1928)	2876	Korea: GG, Seoul, Dobong, Uidong, load of Uiryeong (E: 126°59', N: 37°41')	8. VI- 9. VIII. 2010	Alcohol	KJ433198	This study
346	Ctenicerini	Selatosomus (s. str.) coreanus (Miwa, 1928)	2882	Korea: GW, Yangyang, Seo-myeon, Osaek, Osaekyacksu (E: 128°26', N: 38°04')	12. VIII. 2010	Alcohol	KJ433199	This study
347	Ctenicerini	Selatosomus (s. str.) coreanus (Miwa, 1928)	2883	Korea: GW, Yangyang, Seo-myeon, Osaek, Osaekyacksu (E: 128°26', N: 38°04')	12. VIII. 2010	Alcohol	KJ433200	This study
348	Ctenicerini	Selatosomus (s. str.) coreanus (Miwa, 1928)	2884	Korea: GW, Yangyang, Seo-myeon, Osaek, Osaekyacksu (E: 128°26', N: 38°04')	12. VIII. 2010	Alcohol	KJ433201	This study
349	Ctenicerini	Selatosomus (s. str.) coreanus (Miwa, 1928)	2885	Korea: GW, Yangyang, Seo-myeon, Osaek, Osaekyacksu (E: 128°26', N: 38°04')	12. VIII. 2010	Alcohol	KJ433202	This study
350	Ctenicerini	Selatosomus (s. str.) coreanus (Miwa, 1928)	2886	Korea: GW, Yangyang, Seo-myeon, Osaek, Osaekyacksu (E: 128°26', N: 38°04')	12. VIII. 2010	Alcohol	KJ433203	This study
351	Ctenicerini	Selatosomus (s. str.) coreanus (Miwa, 1928)	2894	Korea: GG, Seoul, Mt. Bukhan (E: 126°59', N: 37°39')	17. IX. 2010	Alcohol	KJ433204	This study
352	Ctenicerini	Selatosomus (s. str.) coreanus (Miwa, 1928)	2895	Korea: GG, Seoul, Mt. Bukhan (E: 126°59', N: 37°39')	17. IX. 2010	Alcohol	KJ433205	This study
353	Ctenicerini	Selatosomus (s. str.) coreanus (Miwa, 1928)	2898	Korea: GG, Seoul, Onerobong, Mt. Bukhan (E: 126°59', N: 37°39')	8. VI. 2010	Alcohol	KJ433206	This study
354	Ctenicerini	Selatosomus (s. str.) coreanus (Miwa, 1928)	2995	Korea (E: 127°', N: 37°)	2006	Alcohol	KJ433207	This study
355	Ctenicerini	Selatosomus (s. str.) coreanus (Miwa, 1928)	3029	Korea: Uijeongbu, Hyowon, Simwonsi, Mt. Bukhan (E: 126°59', N: 37°39')	20. IV. 2010	Alcohol	KJ433208	This study
356	Ctenicerini	Selatosomus (s. str.) coreanus (Miwa, 1928)	3030	Korea: GW, Sockcho, Misiryeong (E: 128°26', N: 38°12')	1. IX-24. VI. 2010	Alcohol	KJ433209	This study
357	Ctenicerini	Selatosomus (s. str.) coreanus (Miwa, 1928)	3031	Korea: GG, Seoul, Dobong, Uidong, Uiryeong-gil (E: 126°59', N: 37°41')	8. VI. 2010	Alcohol	KJ433210	This study
358	Ctenicerini	Selatosomus (s. str.) coreanus (Miwa, 1928)	3034	Korea: GW, Sockcho, Bisundae, Mt. Seolak (E: 128°27', N: 38°09')	6. VII. 2010	Alcohol	KJ433211	This study
359	Ctenicerini	Selatosomus (s. str.) coreanus (Miwa, 1928)	2608	Russia: Primorsky-Krai, Khasansky-District, Barabash (E: 131°29', N: 43°11')	22. VI. 2008	Alcohol	KJ433212	This study
360	Ctenicerini	Selatosomus (s. str.) coreanus (Miwa, 1928)	3204	Korea: JB, Muju (E: 127°39', N: 36°00')	15. V. 2011	Alcohol	KJ433213	This study
361	Ctenicerini	Selatosomus (s. str.) coreanus (Miwa, 1928)	3205	Korea: GW, Injae, Girin, Jindong, Mt. Jeombong (E: 128°25', N: 38°02')	23. V. 2011	Alcohol	KJ433214	This study
362	Ctenicerini	Selatosomus (s. str.) coreanus (Miwa, 1928)	3293	Korea: GB, Uljin (E: 129°24', N: 36°59')	13. VIII. 2007	Frozen	KJ433215	This study
363	Ctenicerini	Selatosomus (s. str.) coreanus (Miwa, 1928)	3341	Korea: CB, Chungju, Mt. Sokri (E: 127°54', N: 36°32')	6. IX. 2011	Frozen	KJ433216	This study
364	Ctenicerini	Selatosomus (s. str.) coreanus (Miwa, 1928)	3397	Korea: GB, Bonghwa, Seockpo-ri (E: 129°06', N: 37°03')	31. VII. 2012	Alcohol	KJ433217	This study
365	Ctenicerini	Selatosomus (s. str.) coreanus (Miwa, 1928)	3398	Korea: GB, Bonghwa, Seockpo-ri (E: 129°06', N: 37°03')	31. VII. 2012	Alcohol	KJ433218	This study
366	Ctenicerini	Selatosomus (s. str.) coreanus (Miwa, 1928)	3406	Korea: GB, Bonghwa, Seockpo-ri (E: 129°06', N: 37°03')	3. VII. 2012	Alcohol	KJ433219	This study
367	Ctenicerini	Selatosomus (s. str.) coreanus (Miwa, 1928)	3415	Korea: GB, Bonghwa, Seockpo-ri (E: 129°06', N: 37°03')	3. VII. 2012	Alcohol	KJ433220	This study
368	Ctenicerini	Selatosomus (s. str.) coreanus (Miwa, 1928)	3418	Korea: GB, Bonghwa, Seockpo-ri (E: 129°06', N: 37°03')	3. VII. 2012	Alcohol	KJ433221	This study
369	Ctenicerini	Selatosomus (s. str.) coreanus (Miwa, 1928)	3423	Korea: GB, Bonghwa, Seockpo-ri (E: 129°06', N: 37°03')	3. VII. 2012	Alcohol	KJ433222	This study
370	Ctenicerini	Selatosomus (s. str.) coreanus (Miwa, 1928)	876	Korea: GW, Pyeongchang, Bangrim, Unkyo (E: 128°23', N: 37°25')	3. VI. 2008	Frozen	KJ433223	This study
371	Ctenicerini	Selatosomus (s. str.) coreanus (Miwa, 1928)	2623	Korea: GB, Bonghwa, Chunghyang, Seobeok (E: 128°54', N: 36°56')	29. V. 2010	Alcohol	KJ433224	This study
372	Ctenicerini	Selatosomus (s. str.) coreanus (Miwa, 1928)	2795	Korea: GW, Pyeongchang, Temple Woljeongsa, Mt. Odae (E: 128°35', N: 37°43')	26. VIII. 2009	Alcohol	KJ433225	This study
373	Ctenicerini	Selatosomus (s. str.) coreanus (Miwa, 1928)	3010	Korea: GW, Jangpyeong (E: 128°25', N: 37°35')	12. IX. 2006	Alcohol	KJ433226	This study
374	Ctenicerini	Selatosomus (s. str.) coreanus (Miwa, 1928)	3203	Korea: GW, Injae, Girin, Jindong, Mt. Jeombong (E: 128°25', N: 38°02')	23. V. 2011	Alcohol	KJ433227	This study
375	Ctenicerini	Selatosomus (s. str.) coreanus (Miwa, 1928)	3308	Korea: GW, Pyeongchang, Jinbu, Daekwanryeong (E: 128°45', N: 37°41')	12. VII. 2012	Frozen	KJ433228	This study
376	Ctenicerini	Selatosomus (s. str.) coreanus (Miwa, 1928)	3498	Korea: N. Hamgyong prov, Mt. Solhan Redge alt, 1433m (E: 128°27', N: 41°48')	2-30. VI. 2008	Dried	KJ433229	This study
377	Ctenicerini	Selatosomus (s. str.) coreanus (Miwa, 1928)	3499	Korea: N. Hamgyong prov, Mt. Solhan Redge alt, 1433m (E: 128°27', N: 41°48')	2-30. VI. 2008	Dried	KJ433230	This study
378	Ctenicerini	Selatosomus (s. str.) coreanus (Miwa, 1928)	2399	Russia: Primorsky Krai (E: 135°00', N: 45°03')	1-7. VII. 2006	Dried	KJ433231	This study
379	Ctenicerini	Selatosomus (s. str.) koryeoensis Schimmel and Han, 2013 (= S. sp. 1 in NCBI)	3419	Korea: GB, Bonghwa, Seockpo-ri (E: 129°06', N: 37°03')	3. VII. 2012	Alcohol	KJ433232	This study
380	Ctenicerini	Selatosomus (s. str.) koryeoensis Schimmel and Han, 2013 (= S. sp. 1 in NCBI)	854	Korea: GG, Uiwang, Hakui, Mt. Cheonggye (E: 127°02', N: 37°24')	28. V. 2009	Frozen	KJ433233	This study
381	Ctenicerini	Selatosomus (s. str.) koryeoensis Schimmel and Han, 2013 (= S. sp. 1 in NCBI)	2511	Korea: CN, Gongju, Banpo, Mt. Geryong (E: 127°12', N: 36°20')	2. V. 2010	Frozen	KJ433234	This study
382	Ctenicerini	Selatosomus (s. str.) koryeoensis Schimmel and Han, 2013 (= S. sp. 1 in NCBI)	3053	Korea: CN, Gongju, Banpo, Mt. Geryong (E: 127°12', N: 36°20')	16. IV. 2011	Frozen	KJ433235	This study
383	Ctenicerini	Selatosomus (s. str.) koryeoensis Schimmel and Han, 2013 (= S. sp. 1 in NCBI)	3054	Korea: CN, Gongju, Banpo, Mt. Geryong (E: 127°12', N: 36°20')	16. IV. 2011	Frozen	KJ433236	This study
384	Ctenicerini	Selatosomus (s. str.) koryeoensis Schimmel and Han, 2013 (= S. sp. 1 in NCBI)	3028	Korea: GW, Sockcho, Misiryeong (E: 128°26', N: 38°12')	1. IV-24. VI. 2010	Alcohol	KJ433237	This study
385	Ctenicerini	Selatosomus (s. str.) koryeoensis Schimmel and Han, 2013 (= S. sp. 1 in NCBI)	3339	Korea: JN, Mt. Jiri Baemsagol (E: 127°34', N: 35°21')	6. IX. 2011	Frozen	KJ433238	This study
386	Ctenicerini	Selatosomus (s. str.) koryeoensis Schimmel and Han, 2013 (= S. sp. 1 in NCBI)	3340	Korea: JN, Mt. Jiri Baemsagol (E: 127°34', N: 35°21')	6. IX. 2011	Frozen	KF317258	Han et al. (2013, unpublished)
387	Ctenicerini	Selatosomus (s. str.) grandis Platia, 2008	3328	Korea: GW, Chuncheon, Dongsan, Joyang (E: 127°47', N: 37°44')	14. VI-7. VII. 2012	Alcohol	KJ433239	This study
388	Ctenicerini	Selatosomus (s. str.) sp. 2, candidate new species	3306	Korea: JJ, Seoguipo, Donnaeko (E: 126°35', N: 33°18')	20. VII. 2012	Frozen	KJ433240	This study
389	Ctenicerini	Selatosomus (s. str.) aeneus (Linnaeus, 1758)	–	Austria: Tyrol, Aldrans (E: 11°36', N: 47°15')	–	–	HM542061	[24]
390	Ctenicerini	Paraphotistus impressus sachalinensis (Miwa, 1928)	2835	Korea: GW, Sockcho, Jangsudae, Mt. Seolak (E: 128°27', N: 38°07')	1. IV-24. VI. 2010	Alcohol	KF317245	Han et al. (2013, unpublished)
391	Ctenicerini	Paraphotistus impressus sachalinensis (Miwa, 1928)	3421	Korea: GB, Bonghwa, Seockpo-ri (E: 129°06', N: 37°03')	3. VII. 2012	Alcohol	KJ433241	This study
392	Ctenicerini	Prosternon aurichalceum Stepanov, 1930	2104	Korea: GB, Punggi, Jungyeong (E: 128°31', N: 36°52')	21. V-3. VI. 2009	Alcohol	KJ433242	This study
393	Ctenicerini	Prosternon aurichalceum Stepanov, 1930	2695	Korea: GG, Gapyeong, Cheongpyeong, Mt. Hwaya (E: 127°25', N: 37°40')	4. VI. 2010	Frozen	KJ433243	This study
394	Ctenicerini	Prosternon aurichalceum Stepanov, 1930	2861	Korea: GW, Injae, Buk-myeon, Misiryeong (E: 128°26', N: 38°12')	10. V-24. VI. 2010	Alcohol	KJ433244	This study
395	Ctenicerini	Prosternon aurichalceum Stepanov, 1930	2862	Korea: GW, Injae, Buk-myeon, Misiryeong (E: 128°26', N: 38°12')	10. V-24. VI. 2010	Alcohol	KJ433245	This study
396	Ctenicerini	Prosternon aurichalceum Stepanov, 1930	2866	Korea: GG, Seoul, Jeongreung, Vally Jeongreung (E: 127°00', N: 37°36')	10. VI-7. IX. 2010	Alcohol	KJ433246	This study
397	Ctenicerini	Prosternon aurichalceum Stepanov, 1930	3024	Korea: GW, Injae, Buk-myeon, Yongdae, Temple Baekdamsa (E: 128°21', N: 38°11')	13. V. 2010	Alcohol	KJ433247	This study
398	Ctenicerini	Prosternon aurichalceum Stepanov, 1930	3232	Korea, CN, Gongju, Banpo, Temple Donghaksa (E: 127°13', N: 36°21')	18. VI. 2011	Frozen	KF317250	Han et al. (2013, unpublished)
399	Ctenicerini	Prosteron sericeum (Gebler, 1824)	2585	Russia: Sakhalin, Kholmsk, Chaplanovo (E: 142°47', N: 46°38')	14. VII. 2008	Alcohol	KJ433248	This study
400	Ctenicerini	Prosternon tesselatum (Linnaeus, 1758)	3494	Russia: Rostov reg, Chertkovo env (E: 40°08', N: 49°23')	11. VI. 2011	Dried	KJ433249	This study
401	Ctenicerini	Prosternon tesselatum (Linnaeus, 1758)	3497	Russia: Rostov reg, Chertkovo env (E: 40°08', N: 49°23')	11. VI. 2011	Dried	KJ433250	This study
402	Ctenicerini	Anostrius castaneus castaneus ((Linnaeus, 1758)	2540	Korea: GW, Pyungchang, Jinbu, Kanpyeong (E: 128°35', N: 37°41')	3. VI. 2005	Dried	KJ433251	This study
403	Ctenicerini	Anostrius daimio (Lewis, 1894)	2147	Japan: Hokkaido, Okusawa, Suigenchi otaru 223m (E: 141°00', N: 43°10')	1. VII. 2009	Alcohol	KF317232	Han et al. (2013, unpublished)
404	Ctenicerini	Anostrius daimio (Lewis, 1894)	2154	Japan: Hokkaido, Tomakomai Experimental Forest (E: 141°36', N: 42°38')	3. VII. 2009	Alcohol	KJ433252	This study
405	Ctenicerini	Anostrius turkestanicus Stepanov, 1935	802	Uzbekistan: Karzhantau Mts. Aktash v. 1600m (E: 65°55', N: 39°55')	29. VI. 2002	Dried	KJ433253	This study
406	Ctenicerini	Pseudanostrius ecarinatus Stepanov, 1930	2824	Korea: GW, Sockcho, Ojackgol, Mt. Seolak (E: 128°27', N: 38°07')	7. VII-26. VIII. 2010	Alcohol	KJ433254	This study
407	Ctenicerini	Pseudanostrius ecarinatus Stepanov, 1930	3407	Korea: GB, Bonghwa, Seockpo-ri (E: 128°42', N: 36°49')	3. VII. 2012	Alcohol	KJ433255	This study
408	Ctenicerini	Pseudanostrius ecarinatus Stepanov, 1930	3413	Korea: GB, Bonghwa, Seockpo-ri (E: 128°42', N: 36°49')	3. VII. 2012	Alcohol	KF317260	Han et al. (2013, unpublished)
409	Ctenicerini	Calamboganus abscondidus (Gurjeva, 1987)	3048	Korea: GW, Pyeongchang, Jinbu, Bukdaesa in Mt. Odae (E: 128°35', N: 37°43')	19. VI. 2010	Dried	KJ433256	This study
410	Ctenicerini	Calambus sp. 1, unidentified	3047	Korea: GW, Pyeongchang, Jinbu, Bukdaesa in Mt. Odae (E: 128°35', N: 37°43')	19. VI. 2010	Dried	KJ433257	This study
411	Ctenicerini	Calambus sp. 1, unidentified	3402	Korea: GB, Bonghwa, Seockpo-ri (E: 128°42', N: 36°49')	31. VII. 2012	Alcohol	KJ433258	This study
412	Ctenicerini	Calambus bipustulatus (Linnaeus, 1767)	2488	Korea: JN, Jeongeup, Temple Naejangsa (E: 126°54', N: 35°29')	6. IV. 2010	Frozen	KJ433259	This study
413	Ctenicerini	Calambus bipustulatus (Linnaeus, 1767)	2489	Korea: JN, Jeongeup, Temple Naejangsa (E: 126°54', N: 35°29')	6. IV. 2010	Frozen	KJ433260	This study
414	Ctenicerini	Calambus bipustulatus (Linnaeus, 1767)	2490	Korea: JN, Jeongeup, Temple Naejangsa (E: 126°54', N: 35°29')	6. IV. 2010	Frozen	KJ433261	This study
415	Ctenicerini	Calambus bipustulatus (Linnaeus, 1767)	3198	Korea: CN, Gongju, Temple Gapsa in Mt. Geryong (E: 127°11', N: 36°21')	1-8. V. 2011	Alcohol	KJ433262	This study
416	Ctenicerini	Calambus bipustulatus (Linnaeus, 1767)	3237	Korea: CN, Gongju, Temple Gapsa in Mt. Geryong (E: 127°11', N: 36°21')	22. V. 2011	Frozen	KF317251	Han et al. (2013, unpublished)
417	Ctenicerini	Calambus bipustulatus (Linnaeus, 1767)	3387	Korea: GB, Bonghwa, Seockpo-ri (E: 128°42', N: 36°49')	31. VII. 2012	Alcohol	KJ433263	This study
418	Ctenicerini	Calambus bipustulatus (Linnaeus, 1767)	3388	Korea: GB, Bonghwa, Seockpo-ri (E: 128°42', N: 36°49')	31. VII. 2012	Alcohol	KJ433264	This study
419	Ctenicerini	Calambus bipustulatus (Linnaeus, 1767)	3411	Korea: GB, Bonghwa, Seockpo-ri (E: 128°42', N: 36°49')	3. VII. 2012	Alcohol	KJ433265	This study
420	Ctenicerini	Calambus bipustulatus (Linnaeus, 1767)	3412	Korea: GB, Bonghwa, Seockpo-ri (E: 128°42', N: 36°49')	3. VII. 2012	Alcohol	KJ433266	This study
421	Ctenicerini	Hypoganomorphus leavicollis (Mannerheim, 1852)	2589	Russia: Sakhalin, Korsakov, Chapavevo-2 (E: 142°47', N: 46°38')	18. VII. 2008	Alcohol	KJ433267	This study
