# Supplementary material for: Reassessment of Species Diversity of the Subfamily Denticollinae (Coleoptera: Elateridae) through DNA Barcoding
Source: PLoS One. 2016 Feb 5;11(2):e0148602. doi: 10.1371/journal.pone.0148602 (PMC4744053; doi:10.1371/journal.pone.0148602)
Supplement: S2 Table — (XLSX) [file pone.0148602.s004.xlsx]

## Sheet: Table S2
Table S2. Intraspecific genetic distances within morphospecies and detection of the separated groups with large genetic distance in Denticollinae.
No. of morphospecies	Genus and species	No. of individuals	Ave. (%)	(Min. (%) -Max. (%))		Detecting the separated groups by DNA barcoding
1	Berninelsonius hyperboreus*	3	0.2	(0.20-0.30)
2	Hypnoidus narymensis*	2	0.3	0.3
3	Homotechnes motchulskyi	1	–	–
4	Limonius minutus	1	–	–
5	Limonius scutellaris*	8	0.35	(0.00-0.8)
6	Cidonotus koltzei**	2	2.5	2.5
7	Pheletes quercus	1	–	–
8	Limoniscus kraatzi**	13	1.15	(0.02-2.20)
9	Athous subfuscus	1	–	–
10	Athous bicolor	1	–	–
11	Athous haemorrhoidalis*	3	0.01	(0-0.17)
12	Athous puncticollis**	4	1.86	(0.00-3.67)
13-1	Athous vittatus***	4	7.37	(0.00-14.97)	→	A. vittatu, France (3)
13-2						A. vittatus, Poland JF781275 (1)
14	Hemicrepidius coreanus**	60	0.53	(0.00-2.62)	→	H. coreanus, JJ (57)
						H. coreanus, Chuja (3)
15	Hemicrepidius sp. 1	1	–	–
16	Hemicrepidius hallaensis stat. nov. *	10	0.69	(0.00-1.70)
17	Hemicrepidius sp. 2**	7	1.36	(0.00-2.29)	→	H. sp. 2, Mt. Gyebang (3)
						H. sp. 2, Mt. Seolak (4)
18	Hemicrepidius oblongus***	21	1.69	(0.00-5.13)	→	H. oblongus, Korea (18)
						H. oblongus, Russia (2)
						H. oblongus, Russia (no. 2397) (1)	comented Athous insulsus Buysson, 1904 from the Russian Far East
19	Hemicrepidius sinuatus sinuatus	1	–	–
20	Hemicrepidius seccesus seccessus**	10	1.55	(0.00-3.37)	→	H. seccesus seccessus (8)
						H. seccessus subsp. (?) (2)
21	Hemicrepidius desertor desertor*	2	0.3	0.3
22	Hemicrepidius niger HM542060	1	–	–
23	Hemicrepidius memnonius AY165705	1	–	–
24	Hemicrepidius (Miwacrepidius) rubriventris*	3	0.23	(0.20-0.30)
25	Hemicrepidius (Miwacrepidius) subcyaneus*	2	0.7	0.7
26	Yukara inornatus*	20	0.02	(0.00-1.40)
27	Denticollini gen. sp 1*	10	0.07	(0.00-0.20)
28	Scutellathous porrecticollis**	10	1.02	(0.00-2.20)
29	Scutellathous comes	1	–	–
30	Scutellathous spec ozaki	1	–	–
31	Ohirathous nantouensis	1	–	–
32	Megathous dauricus	1	–	–
33	Diacanthous undulatus*	3	0.73	(0.60-0.80)
34	Stenagostus umbratilis***	16	5.45	(0.00-16.08)	→	S. umbratilis, Japan (13)
						S. sp. 1 sp. nov., JJ (S. sp 1) (3)
35	Medakathous jactatus*	2	0	0			4
36-1	Denticollis nigricollis nigricollis**	15	1.42	(0.00-3.54)	→	D. n. nigricollis (12)
36-2	Denticollis nigircollis subsp. 1	3	0	0		D. n. nigricollis (no. 2691) (1)
						D. n. nigricollis (no. 2838, 3035) (2)
						D. n. jiriensis subsp. 1. (3)
37	Denticollis sp. 1*	2	0.05	0.05
38	Corymbitodes sp. 1*	5	0.04	(0.00-0.90)
39	Corymbitodes rubripennis	1	–	–
40	Corymbitodes sp. 2*	5	0.32	(0.00-0.80)
41	Corymbitodes gratus	1	–	–
42	Acteniceromorphus selectus*	8	0	0
43	Acteniceromorphus ferrugineipennis*	2	0.6	0.6
44	Acteniceromorphus kurofunei	1	–	–
45	Liotrichus ligneus*	2	0.2	0.2
46	Aplotarsus imperceptus*	10	0.22	(0.00-0.60)
47	Ctenicera pectinicornis*	5	0.78	(0.00-1.50)
48	Ctenicera mediana	1	–	–
49	Neopristilophus insitivus	1	–	–			4	5	6
50	Ctenicerini gen. and sp. 1**	11	2.11	(0.00-3.31)	→	Namhae 1 (no. 738) (1)
						Namhae 2 (no. 739) (1)
						Namhae 3 (no. 740-743) (4)
						Mt. Odae, GW (no. 2805, 2814) (2)
						GG (no. 2890, 3113) (2)	0.95 (0.80-1.10)
						GG (no. 3115) (1)	1.70 (1.70-1.70)	2.15 (2.10-2.20)
51	Ctenicerini gen. and sp. 2*	3	0.1	(0.00-0.15)	→	forming a cluster with sp. 1.
52	Poemnites katalinbodorae**	5	1.79	(0.20-2.59)	→	P. katalinobodorae (no. 2896, 2897) (2)
						P. katalinobodorae (no. 865, 883) (2)
						P. katalinobodorae (no. 882) (1)
53	Actenicerus infirmus**	11	1.2	(0.00-2.28)	→	A. infirmus (9)
						A. infirmus (no. 2802, 3249) (2)
54	Actenicerus alternatus**	3	1.8	(0.00-2.62)	→	A. alternatus, Russia (2)
						A. alternatus, Korea (no. 3309) (1)
55	Actenicerus odaisanus	1	–	–
56	Actenicerus orientalis	1	–	–
57	Actenicerus pruinosus	1	–	–
58	Actenicerus yamashiro	1	–	–
59	Actenicerus suzukii	1	–	–
60	Actenicerus naomii	1	–	–
61	Actenicerus kidonoi	1	–	–
62	Actenicerus kiashianus	1	–	–
63	Actenicerus giganteus	1	–	–
64	Actenicerus athoides	1	–	–
65	Actenicerus aerosus	1	–	–
66	Actenicerus sjaelandicus	1
67	Pristilophus melancholichus	1	–	–
68-1	Selatosomus coreanus***	42	4.28	(0.00-13.58)	→	S. coreanus ? Korea (31)
						S. coreanus ? Korea (no. 3415) (1)
						S. coreanus ? Russia (no. 2608) (1)
68-2					→	S. reichardti ? Korea (8)
						S. reichardti ? Russia (no. 2399) (1)
69-1	Selatosomus koryeoensis***	8	2.08	(0.00-7.76)	→	S. koryeoensis (7)
69-2						S. sp.1 sp. nov. (= S. sp. 1) (1)
70	Selatosomus grandicus	1	–	–
71	Selatosomus sp. 2	1	–	–
72	Selatosomus aeneus	1
73	Paraphotistus impressus*	2	0.9	0.9
74	Prosternon aurichalceum**	7	2.88	(0.20-4.83)	→	P. aurichalceum (4)
						P. sp. 1. sp. nov. (no. 2104, 3232) (2)
						P. sp. 2. sp. nov. (no. 3024) (1)
75	Prosteron sericeum	1	–	–
76	Prosternon tesselatum*	2	1.7	1.7
77	Anostrius castaneus	1	–	–
78	Anostrius daimio *	2	0	0
79	Anostrius turkestanicus	1	–	–
80	Pseudanostrius ecarinatus*	3	0.6	(0.00-0.90)
81	Calamboganus abscondidus	1	–	–
82	Calambus sp. 1*	2	0.6	0.6
83	Calambus bipapulatus*	9	0.59	(0.00-1.40)
84	Hypoganomorphus leavicollis	1	–	–
* denotes that the intraspecific distance are below 2.0%
** denotes that the intraspecific distnace ranged from 2.0% to 4.99%
*** denotes that the unexpectly large intraspecific distance over 5.0%
